# Supplementary material for: Green synthesis of Ag–Fe bimetallic nanoparticles using fungal filtrates: unlocking multifunctional medical and environmental applications
Source: RSC Adv. 2025 Jan 17;15(3):1565–75. doi: 10.1039/d4ra07541b (PMC11740205; doi:10.1039/d4ra07541b)
Supplement: RA-015-D4RA07541B-s001 [file RA-015-D4RA07541B-s001.xlsx]

## Sheet: UV
W.nm	AgFe	Fe	Ag	CFF
200	1.45283	1.42601	3.90853	1.80922
201	1.46586	1.43813	3.80943	1.80966
202	1.47848	1.44978	3.71175	1.81005
203	1.491	1.46119	3.6165	1.8104
204	1.50323	1.4726	3.52753	1.81083
205	1.51524	1.48357	3.44318	1.81126
206	1.52688	1.49425	3.36507	1.81169
207	1.53833	1.50449	3.29133	1.81214
208	1.54946	1.51433	3.22212	1.8125
209	1.56016	1.52377	3.15769	1.81288
210	1.57064	1.53299	3.0966	1.8133
211	1.5935	1.55359	2.99437	1.81367
212	1.61525	1.57322	2.88837	1.81406
213	1.6358	1.59139	2.77883	1.81445
214	1.65511	1.60875	2.66617	1.81483
215	1.67372	1.62547	2.55078	1.81516
216	1.69223	1.64177	2.43351	1.81546
217	1.70839	1.6561	2.32584	1.81579
218	1.72372	1.6695	2.21563	1.81618
219	1.7382	1.68172	2.10304	1.81652
220	1.75155	1.69335	1.98798	1.81678
221	1.76357	1.70346	1.91458	1.81708
222	1.77462	1.7129	1.85601	1.81737
223	1.78449	1.72137	1.80514	1.81769
224	1.7933	1.72894	1.76107	1.81802
225	1.80098	1.73517	1.72083	1.81826
226	1.80729	1.74043	1.68496	1.81847
227	1.81261	1.74471	1.6516	1.81869
228	1.81683	1.74803	1.62167	1.81889
229	1.81994	1.75048	1.59432	1.81914
230	1.82196	1.75203	1.56879	1.81939
231	1.82289	1.75261	1.54592	1.81966
232	1.823	1.75252	1.52505	1.81991
233	1.82228	1.75141	1.5062	1.82008
234	1.82073	1.74971	1.48934	1.82024
235	1.81859	1.74747	1.47414	1.82042
236	1.81579	1.74456	1.46054	1.82062
237	1.81235	1.74112	1.44837	1.82081
238	1.80837	1.7372	1.43773	1.82099
239	1.80418	1.73299	1.42843	1.82117
240	1.79934	1.728	1.42048	1.8214
241	1.7941	1.72251	1.41391	1.82158
242	1.7887	1.71694	1.40847	1.82176
243	1.783	1.71086	1.40429	1.82191
244	1.77723	1.70474	1.40114	1.8221
245	1.77125	1.69831	1.39902	1.82226
246	1.76513	1.69179	1.39777	1.82246
247	1.75917	1.68519	1.39724	1.82263
248	1.75293	1.6784	1.39727	1.82281
249	1.74652	1.67156	1.39758	1.82301
250	1.74004	1.66458	1.39821	1.82314
251	1.73375	1.65751	1.39902	1.82578
252	1.72729	1.65036	1.3999	1.82806
253	1.72086	1.64326	1.40079	1.82998
254	1.71445	1.63624	1.40167	1.83157
255	1.7082	1.62928	1.4024	1.83295
256	1.70201	1.6222	1.40303	1.834
257	1.69566	1.61502	1.40343	1.83485
258	1.68932	1.60806	1.40347	1.83542
259	1.68267	1.60099	1.40321	1.83573
260	1.67563	1.59365	1.40257	1.83558
261	1.66857	1.58656	1.40125	1.83529
262	1.66134	1.57934	1.39941	1.83536
263	1.65418	1.57225	1.39697	1.83536
264	1.64697	1.5652	1.39393	1.83541
265	1.63962	1.55795	1.39021	1.83552
266	1.63222	1.55073	1.38589	1.83561
267	1.62476	1.5437	1.38093	1.83571
268	1.61715	1.53669	1.37543	1.83576
269	1.60977	1.5299	1.36919	1.83584
270	1.60249	1.52326	1.3624	1.83611
271	1.5953	1.51682	1.35508	1.83676
272	1.58812	1.51069	1.34719	1.83737
273	1.58106	1.50473	1.33888	1.838
274	1.57432	1.4989	1.33009	1.83834
275	1.56755	1.4932	1.32091	1.83826
276	1.56104	1.48778	1.31134	1.83812
277	1.55467	1.48256	1.30146	1.83796
278	1.54832	1.47766	1.29139	1.83779
279	1.54218	1.47298	1.28147	1.83761
280	1.53646	1.46835	1.2708	1.83739
281	1.53078	1.46407	1.25999	1.83714
282	1.52547	1.46013	1.24913	1.83684
283	1.52027	1.45632	1.23814	1.83647
284	1.51504	1.45264	1.22695	1.83602
285	1.50986	1.44896	1.21558	1.83558
286	1.50481	1.44557	1.20409	1.83508
287	1.49968	1.44231	1.19245	1.83449
288	1.49459	1.43902	1.18075	1.83385
289	1.48961	1.43577	1.16884	1.83307
290	1.48449	1.43241	1.15696	1.82962
291	1.47933	1.42905	1.14499	1.82633
292	1.47426	1.42572	1.13293	1.82322
293	1.46907	1.42236	1.12081	1.82022
294	1.46391	1.41889	1.10851	1.81738
295	1.4585	1.41544	1.09615	1.81464
296	1.45297	1.41193	1.08356	1.81198
297	1.44715	1.40829	1.07082	1.80943
298	1.44122	1.40455	1.05792	1.80697
299	1.43533	1.40071	1.04476	1.80458
300	1.42924	1.39667	1.03113	1.80225
301	1.42297	1.39265	1.01791	1.80002
302	1.41667	1.3884	1.0046	1.79786
303	1.41014	1.38394	0.99124	1.79577
304	1.40365	1.37936	0.97785	1.79371
305	1.39714	1.37463	0.96449	1.79161
306	1.39044	1.36997	0.95118	1.78958
307	1.3837	1.36503	0.93795	1.78757
308	1.37686	1.35989	0.92484	1.7856
309	1.36994	1.3547	0.91183	1.78368
310	1.36293	1.34953	0.89901	1.78178
311	1.35597	1.34427	0.88645	1.77986
312	1.34898	1.33898	0.87417	1.77792
313	1.34187	1.33367	0.86226	1.77596
314	1.33476	1.32825	0.85077	1.77396
315	1.32759	1.32292	0.83973	1.77187
316	1.32052	1.31743	0.82927	1.7697
317	1.31352	1.31195	0.81946	1.76743
318	1.30674	1.30647	0.81034	1.76499
319	1.29988	1.30102	0.80194	1.76242
320	1.2932	1.2956	0.79436	1.75984
321	1.28672	1.29028	0.78753	1.75957
322	1.28019	1.28485	0.78194	1.75945
323	1.27374	1.27943	0.77733	1.75966
324	1.26742	1.27406	0.77373	1.76015
325	1.26132	1.26865	0.77114	1.76055
326	1.25544	1.26327	0.76961	1.76095
327	1.24977	1.25787	0.76904	1.76153
328	1.24419	1.25259	0.76939	1.76221
329	1.23867	1.24729	0.77043	1.76307
330	1.22459	1.23273	0.77431	1.76398
331	1.2112	1.21877	0.77898	1.76499
332	1.19864	1.2055	0.78447	1.76605
333	1.1869	1.19282	0.79069	1.76717
334	1.17593	1.18071	0.79748	1.76842
335	1.16579	1.16921	0.80481	1.76972
336	1.15642	1.15832	0.81264	1.771
337	1.14773	1.14825	0.8209	1.77232
338	1.1397	1.13881	0.82956	1.77364
339	1.13216	1.1298	0.83856	1.77498
340	1.12526	1.12117	0.84784	1.77623
341	1.11878	1.11298	0.85726	1.77743
342	1.11268	1.1051	0.8669	1.77865
343	1.10714	1.09769	0.87625	1.77977
344	1.10202	1.09055	0.88551	1.78082
345	1.09715	1.08372	0.89465	1.78181
346	1.09256	1.07724	0.90364	1.78275
347	1.08809	1.07095	0.91248	1.78353
348	1.08396	1.06482	0.92119	1.78425
349	1.08014	1.05896	0.92976	1.78484
350	1.07668	1.05348	0.93849	1.78529
351	1.08221	1.05737	0.94521	1.78564
352	1.08729	1.06069	0.95188	1.78586
353	1.09179	1.06339	0.9584	1.7859
354	1.09574	1.06558	0.96474	1.7858
355	1.09912	1.06716	0.97117	1.78559
356	1.10173	1.06814	0.97768	1.78513
357	1.10381	1.06828	0.98424	1.78455
358	1.10523	1.06751	0.99076	1.78371
359	1.10594	1.06598	0.99728	1.78275
360	1.10615	1.06412	1.00376	1.78158
361	1.1126	1.06757	1.00886	1.78024
362	1.11926	1.071	1.01389	1.77869
363	1.12612	1.07443	1.01873	1.77698
364	1.1333	1.07787	1.02341	1.77513
365	1.14071	1.08151	1.028	1.77306
366	1.14854	1.08532	1.03246	1.77076
367	1.15662	1.08923	1.03674	1.76821
368	1.16504	1.09334	1.04085	1.76545
369	1.17365	1.09757	1.04486	1.76251
370	1.18253	1.10186	1.04876	1.75935
371	1.19174	1.10614	1.05245	1.75586
372	1.20126	1.11061	1.05598	1.75179
373	1.21111	1.11536	1.05934	1.74756
374	1.22124	1.12041	1.06256	1.74309
375	1.2315	1.12571	1.06561	1.73872
376	1.24246	1.13124	1.06854	1.73457
377	1.25402	1.13703	1.0712	1.73028
378	1.266	1.14329	1.07368	1.72582
379	1.27851	1.15001	1.07606	1.72119
380	1.29167	1.15707	1.07832	1.71638
381	1.30513	1.16424	1.08038	1.71141
382	1.31229	1.16586	1.08368	1.70631
383	1.31905	1.16714	1.0869	1.70111
384	1.32556	1.16819	1.09014	1.69583
385	1.33172	1.16907	1.09341	1.69038
386	1.33771	1.16974	1.09652	1.68473
387	1.34328	1.16998	1.09962	1.67898
388	1.34854	1.17	1.10266	1.67311
389	1.35352	1.16976	1.10567	1.66715
390	1.35823	1.16933	1.10861	1.6612
391	1.3627	1.16868	1.11155	1.65773
392	1.36693	1.1679	1.1144	1.654
393	1.37091	1.16692	1.1172	1.64995
394	1.3747	1.16575	1.11998	1.64564
395	1.37833	1.1643	1.12267	1.64104
396	1.38196	1.16264	1.12549	1.63624
397	1.38496	1.16086	1.12812	1.63119
398	1.38771	1.15892	1.13075	1.62593
399	1.39015	1.15683	1.13329	1.62049
400	1.39232	1.15459	1.13576	1.61496
401	1.39416	1.15226	1.13817	1.60913
402	1.39594	1.14983	1.1406	1.60312
403	1.39738	1.14725	1.14294	1.59693
404	1.39876	1.1446	1.14528	1.59061
405	1.3999	1.14179	1.14755	1.58417
406	1.40093	1.13893	1.14974	1.57764
407	1.4017	1.13593	1.15196	1.57094
408	1.40232	1.13288	1.15406	1.56414
409	1.4028	1.12975	1.1562	1.5572
410	1.40308	1.12651	1.15831	1.55017
411	1.40314	1.12319	1.16035	1.54303
412	1.40296	1.11979	1.16234	1.53579
413	1.40246	1.11627	1.16438	1.52853
414	1.40173	1.11265	1.16639	1.52119
415	1.40088	1.10895	1.16834	1.51382
416	1.39973	1.1053	1.17028	1.50646
417	1.3983	1.10153	1.17212	1.49916
418	1.39681	1.09772	1.17399	1.49189
419	1.39506	1.09381	1.17584	1.4847
420	1.3931	1.08982	1.17766	1.47753
421	1.39092	1.08571	1.17946	1.47034
422	1.38858	1.08155	1.18117	1.46081
423	1.38588	1.0773	1.18281	1.45104
424	1.38311	1.07309	1.18441	1.44087
425	1.38006	1.06881	1.186	1.43032
426	1.37681	1.06449	1.18753	1.41979
427	1.3734	1.06012	1.18905	1.40925
428	1.36964	1.05563	1.19057	1.39849
429	1.36565	1.0511	1.19208	1.38754
430	1.36138	1.04651	1.19358	1.37636
431	1.35691	1.04189	1.19503	1.36503
432	1.35229	1.03717	1.19652	1.35352
433	1.34745	1.03239	1.198	1.34187
434	1.34246	1.02757	1.19943	1.3301
435	1.33725	1.02272	1.20078	1.31821
436	1.33182	1.01782	1.20215	1.30619
437	1.32629	1.01288	1.20347	1.29409
438	1.32054	1.00791	1.20475	1.28189
439	1.31464	1.00293	1.2061	1.26961
440	1.30875	0.99805	1.2074	1.25725
441	1.3034	0.9934	1.20849	1.2449
442	1.29819	0.98885	1.20944	1.23249
443	1.29318	0.98441	1.21031	1.22004
444	1.28831	0.98011	1.21113	1.20761
445	1.28361	0.97588	1.21186	1.19519
446	1.27905	0.97178	1.2125	1.18274
447	1.27468	0.96781	1.21312	1.17027
448	1.27041	0.96393	1.21357	1.15786
449	1.26642	0.96018	1.21394	1.14545
450	1.26262	0.95656	1.21425	1.13309
451	1.25903	0.95305	1.21444	1.12077
452	1.2556	0.94967	1.21458	1.10853
453	1.25238	0.94646	1.21462	1.09638
454	1.24935	0.94339	1.21458	1.08429
455	1.24656	0.94045	1.21443	1.0723
456	1.244	0.93767	1.21423	1.0604
457	1.24159	0.93503	1.21389	1.04861
458	1.23945	0.9325	1.2135	1.03691
459	1.2376	0.93013	1.21302	1.02537
460	1.23595	0.92786	1.21235	1.01384
461	1.23439	0.92561	1.2116	1.00242
462	1.23244	0.92326	1.21093	0.99111
463	1.23045	0.92093	1.21028	0.97995
464	1.22839	0.91861	1.20964	0.96892
465	1.22632	0.91631	1.20897	0.95803
466	1.22423	0.91402	1.20826	0.94727
467	1.22212	0.91176	1.20749	0.93663
468	1.21998	0.9095	1.20667	0.92613
469	1.21781	0.90729	1.20587	0.91578
470	1.21561	0.90513	1.20503	0.90557
471	1.21342	0.90297	1.20416	0.8955
472	1.21122	0.90084	1.20329	0.88559
473	1.209	0.89872	1.20236	0.8758
474	1.20681	0.89665	1.2014	0.86616
475	1.2047	0.89465	1.20044	0.85665
476	1.20245	0.89254	1.19933	0.84731
477	1.20023	0.89043	1.19827	0.83809
478	1.19804	0.88834	1.19715	0.82902
479	1.19583	0.88625	1.19604	0.82009
480	1.19357	0.88417	1.19487	0.8113
481	1.19127	0.8821	1.19371	0.80266
482	1.18894	0.88002	1.19254	0.79415
483	1.18658	0.87795	1.19137	0.78576
484	1.18427	0.87589	1.19024	0.77751
485	1.18191	0.87383	1.18895	0.76938
486	1.17957	0.87177	1.18759	0.76138
487	1.17724	0.86969	1.1862	0.75351
488	1.1749	0.86762	1.18484	0.74577
489	1.17255	0.86555	1.18346	0.73816
490	1.17018	0.86347	1.18203	0.73067
491	1.16775	0.8614	1.18057	0.7233
492	1.16533	0.85935	1.17912	0.71604
493	1.16295	0.85729	1.17757	0.70889
494	1.16056	0.85521	1.17599	0.70184
495	1.15811	0.85311	1.17444	0.69488
496	1.15561	0.85093	1.17281	0.68802
497	1.15321	0.84887	1.17128	0.68125
498	1.1508	0.8468	1.16969	0.67457
499	1.14838	0.84471	1.1681	0.66797
500	1.14592	0.84264	1.16645	0.66143
501	1.14352	0.84056	1.16476	0.65491
502	1.1411	0.83847	1.16304	0.64858
503	1.13873	0.83639	1.1613	0.64231
504	1.13638	0.8343	1.1595	0.63611
505	1.13402	0.83218	1.1576	0.62996
506	1.13166	0.83006	1.15581	0.62388
507	1.12934	0.82792	1.15407	0.61785
508	1.12701	0.82578	1.1523	0.61187
509	1.12467	0.82363	1.1505	0.60595
510	1.12236	0.82148	1.14872	0.60007
511	1.12006	0.81932	1.14692	0.59425
512	1.11783	0.81716	1.1451	0.58848
513	1.11552	0.81498	1.14318	0.58275
514	1.11319	0.81278	1.14131	0.57708
515	1.1109	0.81059	1.13946	0.57145
516	1.10863	0.80838	1.13754	0.56587
517	1.10636	0.80619	1.13555	0.56033
518	1.1041	0.80399	1.13358	0.55483
519	1.10182	0.80182	1.13153	0.54936
520	1.09951	0.79965	1.12949	0.54394
521	1.09719	0.79748	1.12747	0.53857
522	1.09485	0.79532	1.12547	0.53324
523	1.09248	0.79318	1.12343	0.52794
524	1.09005	0.79104	1.12138	0.5227
525	1.08761	0.7889	1.11934	0.51751
526	1.08513	0.78676	1.11728	0.51235
527	1.08266	0.78464	1.11519	0.50725
528	1.08007	0.78254	1.11304	0.50218
529	1.07744	0.78046	1.11094	0.49717
530	1.07479	0.77835	1.1088	0.4922
531	1.07206	0.77625	1.10661	0.48728
532	1.06932	0.77416	1.10444	0.4824
533	1.06648	0.77206	1.10225	0.47757
534	1.06369	0.77001	1.10011	0.4728
535	1.06088	0.76799	1.09793	0.46808
536	1.05804	0.76597	1.09571	0.46339
537	1.05518	0.76401	1.09346	0.45875
538	1.05229	0.76205	1.09122	0.45416
539	1.04936	0.76012	1.08895	0.44962
540	1.04641	0.75818	1.08671	0.44512
541	1.04343	0.75628	1.08445	0.44068
542	1.04041	0.75439	1.08216	0.43629
543	1.03737	0.75249	1.07988	0.43196
544	1.03434	0.75061	1.07763	0.42767
545	1.03124	0.74875	1.07538	0.42343
546	1.02811	0.74688	1.07312	0.41925
547	1.02491	0.74502	1.07088	0.41513
548	1.02166	0.74316	1.06863	0.41106
549	1.01842	0.7413	1.06639	0.40705
550	1.01515	0.73942	1.06415	0.4031
551	1.01183	0.73756	1.06192	0.39921
552	1.00846	0.73569	1.05968	0.39537
553	1.00506	0.73385	1.05746	0.39159
554	1.00166	0.73199	1.05522	0.38787
555	0.99819	0.73013	1.053	0.38419
556	0.99467	0.72825	1.05079	0.38058
557	0.99107	0.72636	1.04864	0.37701
558	0.98746	0.72444	1.04652	0.37349
559	0.98383	0.7225	1.04445	0.37002
560	0.98018	0.72053	1.04236	0.36656
561	0.97649	0.71856	1.04029	0.36322
562	0.97285	0.71658	1.03821	0.35994
563	0.96926	0.71459	1.03614	0.35672
564	0.96566	0.71261	1.03408	0.35354
565	0.96209	0.71064	1.03198	0.35041
566	0.9586	0.70869	1.02987	0.34734
567	0.95516	0.70678	1.02776	0.34432
568	0.95184	0.70491	1.02566	0.34135
569	0.94856	0.70304	1.02357	0.33842
570	0.94537	0.70117	1.02147	0.33555
571	0.94226	0.69937	1.01934	0.33272
572	0.93923	0.69758	1.0172	0.32994
573	0.93632	0.69581	1.0151	0.32721
574	0.93349	0.69405	1.01296	0.32452
575	0.93078	0.69237	1.01091	0.32187
576	0.92844	0.69086	1.00858	0.31927
577	0.92618	0.68939	1.00621	0.31671
578	0.92405	0.68796	1.00382	0.31419
579	0.92199	0.68655	1.00141	0.31171
580	0.92	0.68519	0.99896	0.30926
581	0.91811	0.68388	0.99654	0.30685
582	0.9163	0.68258	0.99412	0.30448
583	0.91453	0.68131	0.9917	0.30215
584	0.9128	0.68005	0.98928	0.29986
585	0.91113	0.67882	0.98685	0.29759
586	0.90949	0.67759	0.98445	0.29537
587	0.90789	0.67638	0.98202	0.29317
588	0.90633	0.67515	0.97962	0.291
589	0.90477	0.67391	0.97721	0.28886
590	0.90324	0.67268	0.97481	0.28675
591	0.90175	0.67148	0.97243	0.28467
592	0.90027	0.67024	0.97004	0.28261
593	0.89884	0.66904	0.96768	0.28058
594	0.89741	0.66784	0.9653	0.27858
595	0.89601	0.66667	0.96291	0.2766
596	0.89459	0.66546	0.96046	0.27465
597	0.89292	0.6641	0.95828	0.27272
598	0.89125	0.66274	0.95613	0.27082
599	0.88958	0.66139	0.954	0.26895
600	0.88794	0.66005	0.95189	0.26709
601	0.88633	0.65872	0.94976	0.26525
602	0.88472	0.65739	0.94763	0.26344
603	0.88314	0.65609	0.94549	0.26165
604	0.88159	0.65478	0.94338	0.25988
605	0.88005	0.6535	0.94126	0.25813
606	0.87856	0.6522	0.93916	0.2564
607	0.87709	0.65091	0.93705	0.25469
608	0.87562	0.64964	0.93497	0.253
609	0.87416	0.64836	0.93287	0.25133
610	0.87276	0.64711	0.93078	0.24968
611	0.87137	0.64588	0.92868	0.24805
612	0.87	0.64466	0.92659	0.24643
613	0.86863	0.64346	0.9245	0.24484
614	0.86729	0.64227	0.92243	0.24326
615	0.86597	0.64108	0.92033	0.24169
616	0.86466	0.63991	0.91828	0.24015
617	0.86338	0.63875	0.91621	0.23861
618	0.86212	0.6376	0.91418	0.2371
619	0.8609	0.63646	0.91215	0.2356
620	0.8597	0.63534	0.91011	0.23411
621	0.85852	0.63423	0.90805	0.23264
622	0.85733	0.63312	0.90601	0.23119
623	0.85617	0.63202	0.90398	0.22975
624	0.85499	0.63093	0.90197	0.22832
625	0.85382	0.62985	0.89995	0.2269
626	0.85268	0.62879	0.89794	0.22549
627	0.85152	0.62777	0.89594	0.2241
628	0.8504	0.62675	0.89395	0.22272
629	0.8493	0.62576	0.89197	0.22135
630	0.84821	0.62478	0.89001	0.21999
631	0.84709	0.62382	0.88805	0.21864
632	0.846	0.62287	0.8861	0.2173
633	0.8449	0.62194	0.88414	0.21598
634	0.84383	0.62101	0.88219	0.21466
635	0.84275	0.62009	0.88024	0.21336
636	0.84167	0.61919	0.87832	0.21205
637	0.84059	0.61827	0.87639	0.21078
638	0.83954	0.61737	0.87447	0.20952
639	0.8385	0.61646	0.87255	0.20827
640	0.83748	0.61559	0.87063	0.20704
641	0.83646	0.61473	0.86873	0.2058
642	0.83545	0.61387	0.86684	0.20458
643	0.83445	0.61303	0.86497	0.20337
644	0.83347	0.61221	0.86309	0.20217
645	0.83253	0.61138	0.86121	0.20098
646	0.83159	0.61057	0.85937	0.19981
647	0.83065	0.60975	0.85751	0.19864
648	0.82971	0.60894	0.85565	0.19748
649	0.82878	0.60812	0.85379	0.19633
650	0.82784	0.60733	0.85193	0.1952
651	0.82694	0.60655	0.85008	0.19407
652	0.82605	0.60578	0.84826	0.19295
653	0.82516	0.605	0.84644	0.19183
654	0.82431	0.60422	0.84462	0.19073
655	0.82347	0.60348	0.84283	0.18964
656	0.82263	0.60272	0.84104	0.18855
657	0.8218	0.60199	0.83924	0.18748
658	0.82097	0.60126	0.83745	0.18641
659	0.82015	0.60054	0.83565	0.18536
660	0.81934	0.59984	0.83386	0.18432
661	0.8185	0.59913	0.8321	0.18328
662	0.81769	0.59841	0.83033	0.18225
663	0.8169	0.5977	0.82856	0.18123
664	0.81612	0.597	0.82681	0.18022
665	0.81534	0.59631	0.82509	0.17921
666	0.81457	0.59564	0.82339	0.17822
667	0.81379	0.59497	0.82167	0.17723
668	0.81303	0.5943	0.81994	0.17625
669	0.81229	0.59364	0.81821	0.17528
670	0.81153	0.59299	0.81651	0.17432
671	0.81079	0.59233	0.81482	0.17337
672	0.81005	0.59167	0.81313	0.17242
673	0.80934	0.59101	0.81144	0.17148
674	0.80862	0.59038	0.80977	0.17055
675	0.8079	0.58975	0.80812	0.16962
676	0.80719	0.58912	0.80647	0.16871
677	0.80648	0.58852	0.80484	0.1678
678	0.8058	0.58791	0.8032	0.16689
679	0.80514	0.58731	0.80157	0.166
680	0.80447	0.58671	0.79995	0.16511
681	0.8038	0.5861	0.79834	0.16423
682	0.80313	0.58551	0.79671	0.16336
683	0.80246	0.58492	0.79511	0.16249
684	0.80177	0.58433	0.79351	0.16163
685	0.80109	0.58374	0.79193	0.16078
686	0.8004	0.58315	0.79033	0.15993
687	0.7997	0.58255	0.78875	0.15909
688	0.79904	0.58194	0.78717	0.15826
689	0.79836	0.58134	0.78563	0.15743
690	0.79767	0.58075	0.78409	0.15661
691	0.79701	0.58017	0.78255	0.1558
692	0.79634	0.5796	0.78102	0.155
693	0.79565	0.57903	0.77949	0.1542
694	0.79495	0.57847	0.77797	0.15341
695	0.79426	0.57791	0.77645	0.15263
696	0.79355	0.57735	0.77494	0.15186
697	0.79284	0.5768	0.77343	0.15109
698	0.79214	0.57626	0.77193	0.15033
699	0.79143	0.5757	0.77044	0.14957
700	0.79072	0.57513	0.76898	0.14882
701	0.78999	0.57458	0.76753	0.14808
702	0.78926	0.57402	0.76608	0.14734
703	0.78852	0.57346	0.76465	0.14661
704	0.78779	0.57291	0.7632	0.14589
705	0.78708	0.57236	0.76175	0.14517
706	0.78634	0.5718	0.7603	0.14446
707	0.78561	0.57125	0.75885	0.14375
708	0.78489	0.57071	0.75742	0.14305
709	0.78414	0.57019	0.756	0.14236
710	0.7834	0.56966	0.75458	0.14167
711	0.78266	0.56913	0.75318	0.14098
712	0.78192	0.5686	0.75178	0.14031
713	0.78116	0.56806	0.75039	0.13963
714	0.78042	0.56751	0.74901	0.13897
715	0.77967	0.56696	0.74763	0.1383
716	0.77893	0.56641	0.74625	0.13765
717	0.77819	0.56585	0.74487	0.137
718	0.77745	0.5653	0.74352	0.13635
719	0.77669	0.56474	0.74215	0.13571
720	0.77594	0.5642	0.7408	0.13508
721	0.77519	0.56366	0.73946	0.13445
722	0.77443	0.56313	0.73812	0.13383
723	0.77369	0.5626	0.7368	0.13321
724	0.77293	0.56206	0.73547	0.13259
725	0.77217	0.56152	0.73417	0.13198
726	0.77142	0.561	0.73287	0.13138
727	0.77066	0.56046	0.73158	0.13078
728	0.76992	0.55992	0.73031	0.13018
729	0.76917	0.55938	0.72902	0.12959
730	0.76842	0.55882	0.72774	0.12901
731	0.76767	0.55826	0.72645	0.12843
732	0.76694	0.55772	0.72517	0.12785
733	0.7662	0.55718	0.7239	0.12728
734	0.76549	0.55665	0.72263	0.12672
735	0.76478	0.55613	0.72138	0.12615
736	0.76406	0.55559	0.72012	0.1256
737	0.76335	0.55506	0.71887	0.12505
738	0.76264	0.55452	0.71764	0.1245
739	0.76195	0.55399	0.7164	0.12395
740	0.76125	0.55345	0.71519	0.12342
741	0.76053	0.55292	0.71396	0.12288
742	0.75981	0.5524	0.71275	0.12236
743	0.75911	0.55188	0.71155	0.12184
744	0.7584	0.55137	0.71034	0.12132
745	0.75771	0.55085	0.70914	0.1208
746	0.75704	0.55033	0.70795	0.12029
747	0.75638	0.54981	0.70677	0.11978
748	0.75571	0.54931	0.7056	0.11927
749	0.75503	0.54881	0.70445	0.11877
750	0.75435	0.5483	0.70331	0.11828
751	0.75368	0.54781	0.70217	0.118
752	0.75301	0.54732	0.70104	0.11772
753	0.75234	0.54683	0.69991	0.11744
754	0.75167	0.54634	0.69879	0.11716
755	0.751	0.54585	0.69768	0.11689
756	0.75033	0.54536	0.69657	0.11661
757	0.74967	0.54489	0.69547	0.11634
758	0.74899	0.54441	0.69437	0.11606
759	0.74832	0.54394	0.69326	0.11579
760	0.74765	0.54346	0.69216	0.11552
761	0.74698	0.54301	0.69107	0.11525
762	0.74632	0.54254	0.68999	0.11499
763	0.74567	0.54206	0.6889	0.11472
764	0.74501	0.54159	0.68782	0.11445
765	0.74437	0.5411	0.68673	0.11419
766	0.74372	0.54063	0.68566	0.11393
767	0.74305	0.54017	0.68459	0.11367
768	0.74238	0.5397	0.68353	0.11341
769	0.74173	0.53923	0.68247	0.11315
770	0.74109	0.53878	0.68142	0.1129
771	0.74047	0.53833	0.68037	0.11264
772	0.73983	0.53787	0.67936	0.11239
773	0.7392	0.53743	0.67835	0.11214
774	0.73857	0.53697	0.67735	0.11189
775	0.73792	0.53651	0.67637	0.11164
776	0.73727	0.53603	0.67539	0.1114
777	0.73662	0.53554	0.67442	0.11115
778	0.73598	0.53504	0.67347	0.11091
779	0.73536	0.53456	0.67253	0.11067
780	0.73473	0.53405	0.67161	0.11043
781	0.73408	0.53354	0.67069	0.11019
782	0.73342	0.53304	0.66978	0.10996
783	0.73277	0.53254	0.66888	0.10972
784	0.73213	0.53207	0.66798	0.10949
785	0.7315	0.5316	0.6671	0.10926
786	0.73086	0.53114	0.66622	0.10904
787	0.73024	0.53068	0.66535	0.10881
788	0.72963	0.53022	0.6645	0.10859
789	0.72902	0.52976	0.66366	0.10837
790	0.72841	0.5293	0.66287	0.10815
791	0.72808	0.52905	0.66245	0.10793
792	0.72776	0.52879	0.66203	0.10771
793	0.72743	0.52854	0.6616	0.10749
794	0.7271	0.52827	0.66118	0.10728
795	0.72678	0.52802	0.66075	0.10706
796	0.72646	0.52777	0.66033	0.10685
797	0.72616	0.52755	0.65991	0.10663
798	0.72585	0.52732	0.65949	0.10642
799	0.72552	0.52711	0.65908	0.10621
800	0.72519	0.52689	0.65867	0.106

## Sheet: XRD
2θ	Intensity Ag	Intensity Fe	Intensity AgFe
3	3	0	4
3.02	4	1	3
3.04	3	0	3
3.06	2	0	3
3.08	1	2	2
3.1	2	3	2
3.12	3	1	2
3.14	2	2	4
3.16	1	1	4
3.18	1	0	1
3.2	3	1	2
3.22	3	0	3
3.24	4	2	3
3.26	4	2	3
3.28	2	1	2
3.3	1	1	3
3.32	3	2	2
3.34	3	1	1
3.36	2	1	3
3.38	1	3	4
3.4	1	2	3
3.42	3	2	2
3.44	4	3	3
3.46	3	2	3
3.48	3	0	1
3.5	5	0	1
3.52	4	1	3
3.54	1	3	2
3.56	2	2	4
3.58	2	1	6
3.6	1	1	5
3.62	3	2	3
3.64	3	1	4
3.66	2	1	5
3.68	1	3	4
3.7	1	3	3
3.72	3	1	4
3.74	3	2	4
3.76	2	3	5
3.78	3	2	3
3.8	3	3	2
3.82	3	3	4
3.84	4	2	3
3.86	3	3	4
3.88	5	2	7
3.9	5	2	6
3.92	2	1	4
3.94	2	2	5
3.96	1	3	4
3.98	2	2	2
4	4	3	4
4.02	3	2	4
4.04	3	1	1
4.06	2	2	2
4.08	2	2	2
4.1	2	1	3
4.12	2	1	2
4.14	3	3	4
4.16	0	4	4
4.18	1	4	4
4.2	1	1	3
4.22	2	2	4
4.24	2	1	4
4.26	2	1	2
4.28	2	2	2
4.3	2	5	4
4.32	2	5	6
4.34	1	2	4
4.36	2	2	5
4.38	3	1	5
4.4	3	0	3
4.42	2	1	3
4.44	2	2	4
4.46	1	2	5
4.48	1	3	4
4.5	2	2	5
4.52	1	2	4
4.54	1	1	4
4.56	3	2	4
4.58	3	4	5
4.6	2	2	3
4.62	2	1	2
4.64	1	2	4
4.66	3	2	3
4.68	6	1	1
4.7	4	2	4
4.72	1	1	4
4.74	2	2	3
4.76	3	1	4
4.78	1	1	6
4.8	3	2	4
4.82	4	2	5
4.84	3	1	6
4.86	2	3	4
4.88	2	3	4
4.9	1	1	4
4.92	2	2	5
4.94	1	3	8
4.96	2	3	3
4.98	3	1	3
5	2	1	7
5.02	2	3	6
5.04	2	2	4
5.06	3	3	3
5.08	2	3	3
5.1	2	3	5
5.12	1	2	8
5.14	2	1	7
5.16	3	2	3
5.18	2	3	3
5.2	3	3	6
5.22	4	2	7
5.24	2	3	5
5.26	1	1	3
5.28	0	2	3
5.3	1	4	6
5.32	3	3	6
5.34	3	2	4
5.36	2	3	3
5.38	2	3	3
5.4	2	2	3
5.42	2	3	5
5.44	1	1	6
5.46	1	1	6
5.48	2	2	5
5.5	3	1	4
5.52	3	2	5
5.54	2	2	4
5.56	3	2	6
5.58	4	1	6
5.6	2	2	4
5.62	1	1	3
5.64	3	0	4
5.66	4	2	7
5.68	3	3	6
5.7	3	4	2
5.72	3	3	6
5.74	2	4	11
5.76	1	4	9
5.78	0	5	7
5.8	1	4	3
5.82	1	2	4
5.84	3	1	5
5.86	4	1	3
5.88	3	2	4
5.9	2	1	5
5.92	3	3	6
5.94	1	4	6
5.96	1	4	6
5.98	3	3	5
6	3	2	5
6.02	2	3	7
6.04	2	3	7
6.06	1	4	5
6.08	3	2	6
6.1	3	3	6
6.12	1	4	6
6.14	2	2	6
6.16	2	1	5
6.18	4	2	9
6.2	5	3	8
6.22	2	3	7
6.24	0	3	8
6.26	2	2	8
6.28	2	2	8
6.3	1	1	7
6.32	2	2	8
6.34	2	3	6
6.36	2	3	6
6.38	3	3	7
6.4	2	4	7
6.42	1	5	5
6.44	1	2	7
6.46	3	1	10
6.48	3	1	8
6.5	2	3	5
6.52	2	5	5
6.54	1	6	6
6.56	1	7	7
6.58	0	3	10
6.6	1	1	7
6.62	2	2	6
6.64	2	3	6
6.66	2	2	7
6.68	4	1	5
6.7	3	2	5
6.72	2	2	6
6.74	3	5	8
6.76	3	6	10
6.78	2	2	8
6.8	3	1	6
6.82	1	2	6
6.84	2	4	4
6.86	2	5	9
6.88	2	3	11
6.9	2	2	7
6.92	1	3	8
6.94	2	5	10
6.96	2	4	8
6.98	0	4	11
7	1	2	12
7.02	2	3	8
7.04	1	3	7
7.06	0	1	6
7.08	1	2	7
7.1	2	2	11
7.12	3	3	9
7.14	2	3	9
7.16	2	3	10
7.18	3	0	9
7.2	3	2	7
7.22	1	3	6
7.24	2	2	7
7.26	1	3	8
7.28	1	4	8
7.3	1	3	4
7.32	2	4	5
7.34	2	3	8
7.36	2	2	9
7.38	2	3	9
7.4	1	3	5
7.42	2	3	5
7.44	1	3	7
7.46	2	4	10
7.48	3	3	11
7.5	3	1	10
7.52	1	2	6
7.54	1	3	7
7.56	1	2	8
7.58	2	1	7
7.6	1	3	7
7.62	2	4	8
7.64	3	3	9
7.66	2	4	11
7.68	1	4	10
7.7	0	3	7
7.72	1	4	10
7.74	1	5	11
7.76	2	3	8
7.78	1	2	9
7.8	2	2	9
7.82	1	3	9
7.84	1	2	8
7.86	2	1	8
7.88	1	2	8
7.9	0	4	8
7.92	1	3	7
7.94	2	4	8
7.96	2	4	11
7.98	3	3	8
8	3	3	8
8.02	1	4	9
8.04	1	3	10
8.06	1	4	10
8.08	1	4	10
8.1	4	4	9
8.12	6	6	9
8.14	3	3	9
8.16	3	2	10
8.18	2	3	8
8.2	2	2	10
8.22	4	2	11
8.24	4	2	10
8.26	2	2	9
8.28	2	2	5
8.3	3	6	6
8.32	3	4	8
8.34	1	2	10
8.36	2	2	8
8.38	2	3	6
8.4	2	3	9
8.42	2	1	12
8.44	3	2	12
8.46	1	4	9
8.48	3	5	10
8.5	2	4	11
8.52	1	2	9
8.54	2	3	8
8.56	1	4	9
8.58	3	2	10
8.6	4	2	11
8.62	3	3	13
8.64	3	2	10
8.66	2	3	7
8.68	1	5	7
8.7	2	4	10
8.72	4	2	10
8.74	1	3	8
8.76	2	2	9
8.78	1	2	8
8.8	2	2	10
8.82	1	3	9
8.84	1	2	11
8.86	1	5	13
8.88	1	6	11
8.9	1	2	10
8.92	2	3	11
8.94	3	4	11
8.96	1	5	10
8.98	3	4	11
9	4	4	12
9.02	3	5	13
9.04	3	5	14
9.06	2	4	17
9.08	3	4	13
9.1	3	3	11
9.12	0	4	10
9.14	2	5	10
9.16	2	5	13
9.18	0	4	14
9.2	3	4	13
9.22	4	6	13
9.24	1	7	14
9.26	0	5	10
9.28	0	3	6
9.3	1	4	7
9.32	3	4	12
9.34	3	3	12
9.36	2	4	12
9.38	1	4	14
9.4	2	5	12
9.42	2	7	14
9.44	3	4	14
9.46	2	1	10
9.48	2	1	10
9.5	2	3	7
9.52	1	4	11
9.54	1	4	12
9.56	1	2	13
9.58	1	2	12
9.6	0	5	12
9.62	1	5	13
9.64	3	6	15
9.66	3	2	12
9.68	3	2	14
9.7	5	2	16
9.72	6	4	11
9.74	3	3	10
9.76	1	2	11
9.78	0	5	14
9.8	2	3	13
9.82	2	1	13
9.84	2	3	12
9.86	3	2	11
9.88	3	1	12
9.9	3	4	15
9.92	4	5	12
9.94	2	4	8
9.96	1	1	8
9.98	0	3	10
10	2	6	12
10.02	4	4	13
10.04	5	3	12
10.06	2	4	12
10.08	3	6	11
10.1	6	3	9
10.12	4	3	12
10.14	1	2	14
10.16	3	2	13
10.18	4	3	10
10.2	3	4	13
10.22	2	4	12
10.24	1	2	12
10.26	1	1	15
10.28	4	2	12
10.3	3	5	15
10.32	2	6	14
10.34	1	7	13
10.36	2	4	14
10.38	1	3	20
10.4	4	6	15
10.42	6	7	14
10.44	3	3	12
10.46	2	5	13
10.48	1	4	13
10.5	1	4	12
10.52	2	3	15
10.54	2	5	19
10.56	2	9	18
10.58	1	4	14
10.6	2	4	17
10.62	3	7	17
10.64	4	4	12
10.66	3	2	15
10.68	3	2	13
10.7	4	3	16
10.72	2	6	16
10.74	3	4	16
10.76	3	3	12
10.78	4	3	13
10.8	3	4	11
10.82	2	3	11
10.84	3	3	12
10.86	5	2	10
10.88	3	4	12
10.9	2	4	17
10.92	1	2	21
10.94	2	4	17
10.96	4	7	18
10.98	4	7	16
11	2	3	15
11.02	3	5	17
11.04	3	6	16
11.06	1	3	17
11.08	1	5	15
11.1	1	3	13
11.12	3	3	15
11.14	3	3	14
11.16	4	2	15
11.18	3	5	15
11.2	1	4	14
11.22	2	3	14
11.24	2	1	11
11.26	5	2	14
11.28	5	3	16
11.3	2	4	11
11.32	2	4	14
11.34	2	2	14
11.36	2	6	13
11.38	3	7	15
11.4	2	5	12
11.42	1	4	18
11.44	1	2	23
11.46	3	3	21
11.48	2	5	20
11.5	2	8	18
11.52	1	6	18
11.54	2	8	16
11.56	3	6	16
11.58	3	6	10
11.6	1	6	12
11.62	3	5	15
11.64	1	4	18
11.66	1	5	19
11.68	3	5	17
11.7	3	5	16
11.72	0	5	17
11.74	0	5	16
11.76	1	2	19
11.78	2	3	27
11.8	2	5	21
11.82	3	4	18
11.84	4	3	17
11.86	4	6	19
11.88	2	4	15
11.9	2	4	19
11.92	2	5	19
11.94	3	4	20
11.96	3	6	15
11.98	4	5	16
12	2	4	16
12.02	3	5	16
12.04	3	6	13
12.06	2	5	16
12.08	1	6	13
12.1	3	5	19
12.12	6	3	20
12.14	3	3	20
12.16	2	6	19
12.18	3	3	21
12.2	2	1	21
12.22	1	4	20
12.24	2	6	18
12.26	1	5	17
12.28	2	6	15
12.3	4	5	13
12.32	4	2	17
12.34	1	2	22
12.36	1	4	22
12.38	2	5	18
12.4	1	4	25
12.42	2	3	28
12.44	3	2	25
12.46	3	3	20
12.48	4	6	18
12.5	3	8	25
12.52	3	10	19
12.54	4	4	18
12.56	1	5	23
12.58	1	6	16
12.6	0	6	15
12.62	1	6	17
12.64	1	5	23
12.66	3	3	19
12.68	5	4	17
12.7	5	3	20
12.72	4	4	15
12.74	4	5	22
12.76	2	5	21
12.78	4	3	18
12.8	2	3	22
12.82	3	3	17
12.84	3	5	18
12.86	2	4	18
12.88	2	2	20
12.9	3	3	14
12.92	3	4	16
12.94	3	5	23
12.96	2	4	20
12.98	2	5	18
13	4	5	24
13.02	1	6	25
13.04	0	6	17
13.06	2	5	23
13.08	5	7	25
13.1	1	6	19
13.12	0	6	18
13.14	1	6	16
13.16	1	7	21
13.18	3	6	24
13.2	1	4	19
13.22	1	6	17
13.24	1	4	22
13.26	1	7	23
13.28	3	3	21
13.3	5	3	24
13.32	3	4	22
13.34	4	4	25
13.36	5	4	22
13.38	3	6	25
13.4	2	5	22
13.42	3	5	21
13.44	4	9	23
13.46	1	7	22
13.48	1	6	19
13.5	2	5	21
13.52	1	4	21
13.54	3	7	20
13.56	4	4	25
13.58	3	7	20
13.6	3	6	12
13.62	3	5	19
13.64	4	5	15
13.66	3	7	25
13.68	4	5	26
13.7	3	7	17
13.72	2	9	15
13.74	3	9	16
13.76	3	5	16
13.78	2	3	20
13.8	4	3	20
13.82	6	9	26
13.84	6	8	21
13.86	4	4	26
13.88	4	4	28
13.9	1	6	28
13.92	2	7	24
13.94	2	5	30
13.96	4	5	22
13.98	2	6	26
14	3	10	22
14.02	5	3	20
14.04	6	2	18
14.06	2	2	27
14.08	2	5	30
14.1	1	6	23
14.12	2	7	24
14.14	3	7	26
14.16	3	5	20
14.18	4	5	24
14.2	2	7	21
14.22	1	5	26
14.24	1	3	26
14.26	4	4	28
14.28	1	7	23
14.3	1	10	17
14.32	3	6	28
14.34	2	6	24
14.36	1	8	25
14.38	2	7	21
14.4	3	4	21
14.42	1	6	27
14.44	2	7	30
14.46	2	6	23
14.48	3	8	21
14.5	1	9	22
14.52	2	7	23
14.54	3	9	21
14.56	1	8	23
14.58	3	3	20
14.6	2	5	18
14.62	4	5	20
14.64	5	8	23
14.66	1	6	25
14.68	3	6	25
14.7	4	5	23
14.72	2	7	28
14.74	0	5	28
14.76	2	4	27
14.78	3	6	20
14.8	4	4	25
14.82	2	5	21
14.84	1	6	22
14.86	3	6	22
14.88	2	8	26
14.9	5	8	24
14.92	3	5	26
14.94	0	6	26
14.96	0	4	25
14.98	2	4	28
15	4	4	30
15.02	3	9	26
15.04	2	5	28
15.06	2	2	26
15.08	4	6	25
15.1	3	6	23
15.12	3	8	27
15.14	1	8	18
15.16	3	5	18
15.18	2	10	20
15.2	3	7	21
15.22	1	4	16
15.24	3	8	24
15.26	2	7	22
15.28	1	4	28
15.3	2	6	32
15.32	5	8	28
15.34	3	8	21
15.36	2	9	27
15.38	2	6	21
15.4	3	7	21
15.42	3	1	25
15.44	2	3	24
15.46	3	9	24
15.48	4	7	18
15.5	0	4	25
15.52	1	2	23
15.54	3	5	24
15.56	5	6	28
15.58	3	6	24
15.6	2	4	20
15.62	1	9	19
15.64	3	8	28
15.66	3	10	19
15.68	2	4	25
15.7	3	5	27
15.72	2	4	21
15.74	4	7	23
15.76	2	7	24
15.78	2	6	26
15.8	4	9	26
15.82	2	6	33
15.84	2	8	23
15.86	2	2	21
15.88	7	4	23
15.9	4	8	29
15.92	1	7	17
15.94	3	7	14
15.96	2	8	20
15.98	1	6	23
16	3	5	19
16.02	3	7	30
16.04	4	6	29
16.06	4	5	23
16.08	3	6	29
16.1	1	5	26
16.12	4	5	24
16.14	2	4	35
16.16	3	6	25
16.18	4	6	29
16.2	2	5	21
16.22	2	7	17
16.24	4	7	30
16.26	3	8	29
16.28	3	13	26
16.3	3	5	28
16.32	4	8	32
16.34	2	7	20
16.36	3	7	22
16.38	4	4	29
16.4	3	8	29
16.42	7	7	26
16.44	6	6	25
16.46	4	6	28
16.48	2	10	25
16.5	4	6	28
16.52	3	5	27
16.54	6	10	28
16.56	5	11	19
16.58	3	6	31
16.6	6	9	29
16.62	3	8	31
16.64	4	6	25
16.66	2	4	21
16.68	6	9	25
16.7	4	9	31
16.72	1	7	35
16.74	4	9	27
16.76	3	8	31
16.78	1	7	23
16.8	6	6	25
16.82	7	6	33
16.84	3	10	26
16.86	0	11	20
16.88	1	11	32
16.9	2	5	23
16.92	2	7	19
16.94	5	7	24
16.96	3	5	28
16.98	3	3	27
17	4	7	24
17.02	3	11	30
17.04	3	11	28
17.06	3	13	34
17.08	4	8	28
17.1	3	10	26
17.12	3	6	32
17.14	2	9	25
17.16	4	9	24
17.18	6	11	30
17.2	3	5	30
17.22	4	8	33
17.24	2	3	23
17.26	5	6	27
17.28	5	5	31
17.3	2	5	35
17.32	5	9	22
17.34	5	4	26
17.36	7	7	22
17.38	2	10	23
17.4	6	7	37
17.42	3	7	27
17.44	3	4	26
17.46	4	9	30
17.48	5	9	33
17.5	3	10	29
17.52	1	8	24
17.54	5	9	35
17.56	3	6	34
17.58	4	8	25
17.6	2	6	28
17.62	2	11	26
17.64	1	9	21
17.66	1	10	30
17.68	2	7	33
17.7	6	6	29
17.72	3	6	30
17.74	5	6	26
17.76	6	7	30
17.78	6	9	31
17.8	4	4	34
17.82	0	3	23
17.84	3	7	24
17.86	5	7	31
17.88	6	11	26
17.9	2	10	26
17.92	3	8	30
17.94	5	6	30
17.96	3	5	25
17.98	2	7	28
18	3	8	33
18.02	3	6	31
18.04	3	5	41
18.06	6	6	21
18.08	3	9	24
18.1	4	6	30
18.12	3	9	35
18.14	2	10	28
18.16	4	4	28
18.18	5	10	29
18.2	5	5	23
18.22	1	5	29
18.24	3	13	15
18.26	3	8	22
18.28	4	11	26
18.3	2	6	27
18.32	7	7	29
18.34	6	7	39
18.36	4	9	26
18.38	1	14	27
18.4	4	8	22
18.42	8	10	27
18.44	3	8	31
18.46	4	3	33
18.48	5	5	28
18.5	5	4	28
18.52	9	9	33
18.54	6	8	33
18.56	4	7	34
18.58	2	11	31
18.6	3	6	21
18.62	3	4	28
18.64	2	9	34
18.66	3	7	31
18.68	4	4	41
18.7	3	12	26
18.72	4	6	22
18.74	2	12	32
18.76	5	9	26
18.78	1	6	28
18.8	4	9	29
18.82	2	6	29
18.84	5	10	24
18.86	2	7	26
18.88	0	11	27
18.9	4	5	25
18.92	2	11	24
18.94	3	8	32
18.96	4	5	26
18.98	6	12	24
19	5	10	31
19.02	5	8	32
19.04	7	4	31
19.06	1	9	28
19.08	5	7	25
19.1	3	14	31
19.12	5	7	27
19.14	5	9	27
19.16	4	9	40
19.18	6	6	24
19.2	2	9	27
19.22	3	10	26
19.24	1	6	34
19.26	3	8	30
19.28	2	11	25
19.3	5	6	33
19.32	1	11	27
19.34	3	10	30
19.36	3	14	29
19.38	2	13	19
19.4	1	8	39
19.42	2	12	35
19.44	2	12	34
19.46	5	7	24
19.48	4	10	34
19.5	3	3	30
19.52	5	15	24
19.54	5	6	21
19.56	3	6	34
19.58	6	9	31
19.6	7	4	31
19.62	4	4	32
19.64	1	6	37
19.66	4	10	29
19.68	4	7	21
19.7	4	8	31
19.72	4	11	19
19.74	4	12	27
19.76	4	8	19
19.78	1	9	31
19.8	7	5	41
19.82	6	8	28
19.84	5	7	26
19.86	5	11	26
19.88	3	9	33
19.9	3	16	35
19.92	3	5	34
19.94	2	9	28
19.96	4	9	34
19.98	6	7	29
20	3	6	42
20.02	1	6	25
20.04	8	11	21
20.06	6	3	23
20.08	5	12	19
20.1	8	6	29
20.12	2	13	25
20.14	5	12	27
20.16	2	7	30
20.18	3	7	28
20.2	7	6	33
20.22	6	12	30
20.24	1	5	32
20.26	0	9	35
20.28	4	12	30
20.3	4	5	22
20.32	3	6	38
20.34	1	9	40
20.36	5	5	33
20.38	6	5	32
20.4	5	17	24
20.42	9	7	19
20.44	4	12	30
20.46	4	13	26
20.48	5	12	20
20.5	2	10	34
20.52	3	6	23
20.54	2	13	36
20.56	4	11	27
20.58	4	13	26
20.6	7	8	30
20.62	2	8	31
20.64	5	5	34
20.66	2	9	20
20.68	7	9	28
20.7	3	9	27
20.72	6	7	30
20.74	2	10	29
20.76	4	9	25
20.78	3	8	40
20.8	5	13	26
20.82	2	9	32
20.84	2	10	28
20.86	8	7	33
20.88	7	10	27
20.9	3	11	33
20.92	10	7	26
20.94	3	9	31
20.96	9	8	33
20.98	6	10	33
21	2	9	22
21.02	6	10	32
21.04	5	11	29
21.06	1	9	34
21.08	5	8	37
21.1	5	7	39
21.12	4	7	37
21.14	3	13	30
21.16	3	7	42
21.18	3	8	26
21.2	6	6	30
21.22	4	10	40
21.24	3	10	32
21.26	5	6	20
21.28	4	7	29
21.3	2	10	25
21.32	5	6	18
21.34	3	11	35
21.36	5	6	26
21.38	6	10	30
21.4	3	5	24
21.42	6	10	28
21.44	1	6	29
21.46	2	11	32
21.48	4	10	33
21.5	4	11	26
21.52	10	9	28
21.54	3	12	27
21.56	5	8	26
21.58	3	9	24
21.6	5	10	29
21.62	6	6	29
21.64	6	10	34
21.66	4	6	36
21.68	2	11	35
21.7	2	3	33
21.72	0	9	25
21.74	1	10	16
21.76	4	6	30
21.78	4	1	30
21.8	2	10	29
21.82	4	8	22
21.84	3	12	28
21.86	9	12	32
21.88	5	7	27
21.9	6	6	24
21.92	4	8	21
21.94	4	13	32
21.96	5	8	27
21.98	2	8	16
22	2	12	34
22.02	4	12	25
22.04	3	11	37
22.06	5	4	31
22.08	4	9	25
22.1	1	3	36
22.12	6	5	30
22.14	3	15	22
22.16	2	9	27
22.18	5	10	29
22.2	2	14	28
22.22	3	13	33
22.24	5	8	27
22.26	3	5	24
22.28	2	6	38
22.3	8	8	32
22.32	6	7	32
22.34	5	8	33
22.36	4	6	32
22.38	1	12	32
22.4	4	14	26
22.42	2	8	34
22.44	3	8	33
22.46	3	12	28
22.48	7	6	34
22.5	5	2	22
22.52	4	12	36
22.54	5	8	32
22.56	2	5	29
22.58	4	8	26
22.6	8	9	26
22.62	3	10	31
22.64	4	14	25
22.66	1	7	26
22.68	3	11	34
22.7	2	8	35
22.72	5	11	30
22.74	4	6	34
22.76	4	10	29
22.78	2	7	22
22.8	1	6	39
22.82	3	7	30
22.84	4	8	33
22.86	4	7	26
22.88	5	8	28
22.9	6	8	30
22.92	2	7	39
22.94	6	9	24
22.96	3	7	27
22.98	1	7	30
23	6	11	31
23.02	9	6	17
23.04	6	5	25
23.06	6	6	30
23.08	4	10	27
23.1	6	8	39
23.12	2	12	27
23.14	3	9	43
23.16	1	9	31
23.18	3	6	25
23.2	3	7	30
23.22	6	6	27
23.24	4	7	28
23.26	5	9	34
23.28	3	9	38
23.3	5	10	34
23.32	7	15	39
23.34	9	10	26
23.36	1	6	28
23.38	1	12	17
23.4	2	15	26
23.42	2	13	28
23.44	4	8	23
23.46	3	9	32
23.48	4	9	29
23.5	5	6	27
23.52	6	10	30
23.54	5	10	37
23.56	4	7	30
23.58	4	11	27
23.6	4	7	33
23.62	2	7	36
23.64	1	6	28
23.66	4	8	33
23.68	5	11	28
23.7	3	4	33
23.72	1	6	41
23.74	5	7	29
23.76	2	16	30
23.78	1	10	38
23.8	2	8	33
23.82	3	8	31
23.84	2	12	34
23.86	6	8	38
23.88	4	4	40
23.9	4	7	30
23.92	3	7	35
23.94	4	10	30
23.96	6	9	26
23.98	1	6	31
24	5	9	35
24.02	4	6	29
24.04	2	8	33
24.06	2	12	37
24.08	2	8	38
24.1	3	8	39
24.12	4	13	36
24.14	7	13	30
24.16	4	20	39
24.18	4	13	33
24.2	5	12	32
24.22	1	10	29
24.24	3	7	35
24.26	4	12	34
24.28	3	10	34
24.3	3	4	36
24.32	6	6	23
24.34	3	9	30
24.36	4	10	35
24.38	2	8	28
24.4	2	10	25
24.42	1	12	32
24.44	3	8	32
24.46	1	9	27
24.48	2	11	32
24.5	2	8	38
24.52	2	6	32
24.54	7	8	25
24.56	4	10	28
24.58	4	11	37
24.6	4	11	33
24.62	6	8	33
24.64	3	7	38
24.66	2	10	32
24.68	0	9	32
24.7	7	8	36
24.72	5	9	31
24.74	2	10	34
24.76	3	8	30
24.78	6	6	26
24.8	4	8	25
24.82	1	4	38
24.84	4	8	41
24.86	4	8	24
24.88	2	4	28
24.9	4	10	30
24.92	3	6	28
24.94	5	7	25
24.96	3	13	31
24.98	6	8	31
25	4	7	36
25.02	3	7	35
25.04	4	5	29
25.06	4	6	33
25.08	3	6	32
25.1	6	4	29
25.12	4	5	27
25.14	3	11	25
25.16	4	15	30
25.18	5	13	27
25.2	4	7	31
25.22	5	5	33
25.24	5	7	29
25.26	3	9	31
25.28	5	9	31
25.3	3	7	27
25.32	4	9	32
25.34	4	9	36
25.36	4	7	38
25.38	3	4	31
25.4	4	5	37
25.42	2	6	35
25.44	4	8	33
25.46	5	9	24
25.48	1	15	27
25.5	2	8	29
25.52	2	7	37
25.54	4	6	33
25.56	5	8	40
25.58	5	6	34
25.6	3	5	30
25.62	7	7	24
25.64	3	6	20
25.66	6	8	24
25.68	5	9	29
25.7	4	11	29
25.72	3	11	34
25.74	4	3	40
25.76	6	11	33
25.78	6	9	38
25.8	2	10	37
25.82	0	9	37
25.84	4	10	32
25.86	2	7	28
25.88	3	8	30
25.9	2	7	42
25.92	0	9	33
25.94	2	8	31
25.96	1	13	24
25.98	3	7	33
26	5	8	32
26.02	3	11	33
26.04	2	4	22
26.06	0	10	32
26.08	1	10	28
26.1	1	6	31
26.12	3	6	31
26.14	5	8	31
26.16	4	10	30
26.18	1	7	26
26.2	1	12	29
26.22	3	11	31
26.24	4	9	34
26.26	5	8	39
26.28	2	9	31
26.3	2	8	32
26.32	3	9	38
26.34	1	11	30
26.36	5	11	35
26.38	4	7	28
26.4	2	9	29
26.42	3	11	26
26.44	2	12	30
26.46	6	13	30
26.48	6	9	30
26.5	4	10	31
26.52	3	7	32
26.54	1	7	26
26.56	4	6	31
26.58	4	6	31
26.6	4	7	29
26.62	5	7	32
26.64	6	8	37
26.66	3	6	34
26.68	4	9	36
26.7	3	12	29
26.72	4	12	33
26.74	5	8	29
26.76	4	12	19
26.78	2	10	26
26.8	3	11	34
26.82	5	8	28
26.84	4	5	37
26.86	4	6	35
26.88	5	6	33
26.9	2	7	37
26.92	2	6	27
26.94	5	8	34
26.96	5	10	25
26.98	6	7	29
27	3	6	35
27.02	6	5	30
27.04	5	9	31
27.06	4	9	29
27.08	4	8	34
27.1	4	9	34
27.12	5	10	27
27.14	3	9	27
27.16	3	7	26
27.18	7	10	23
27.2	5	12	28
27.22	5	11	31
27.24	7	10	28
27.26	7	6	29
27.28	6	7	27
27.3	7	14	33
27.32	7	11	29
27.34	6	6	30
27.36	12	8	31
27.38	22	7	31
27.4	19	4	23
27.42	14	6	28
27.44	12	10	24
27.46	10	9	29
27.48	9	8	29
27.5	12	5	27
27.52	9	11	32
27.54	12	8	27
27.56	11	6	29
27.58	8	9	35
27.6	11	7	29
27.62	10	11	32
27.64	7	8	32
27.66	5	8	38
27.68	5	9	36
27.7	3	12	37
27.72	2	7	30
27.74	2	7	31
27.76	3	8	35
27.78	5	8	32
27.8	4	9	27
27.82	2	11	32
27.84	3	9	34
27.86	5	7	27
27.88	6	9	28
27.9	4	11	37
27.92	4	11	36
27.94	6	11	34
27.96	3	12	29
27.98	2	7	28
28	4	4	32
28.02	5	8	28
28.04	2	12	31
28.06	5	12	35
28.08	5	11	29
28.1	6	12	25
28.12	2	5	29
28.14	1	7	32
28.16	2	5	32
28.18	1	7	30
28.2	0	7	31
28.22	3	7	27
28.24	2	8	27
28.26	2	9	29
28.28	4	8	33
28.3	5	7	40
28.32	6	12	39
28.34	6	10	29
28.36	3	9	33
28.38	1	7	31
28.4	0	7	23
28.42	3	12	29
28.44	4	8	33
28.46	5	4	35
28.48	5	6	30
28.5	3	10	34
28.52	3	7	33
28.54	5	5	29
28.56	4	8	29
28.58	1	6	35
28.6	3	5	34
28.62	5	8	32
28.64	4	10	29
28.66	3	9	31
28.68	4	11	28
28.7	4	10	26
28.72	3	6	28
28.74	4	9	33
28.76	4	8	45
28.78	2	5	38
28.8	2	5	39
28.82	3	7	43
28.84	4	7	36
28.86	3	11	31
28.88	2	13	30
28.9	4	13	28
28.92	5	12	29
28.94	2	10	33
28.96	2	9	38
28.98	5	11	35
29	5	10	40
29.02	2	8	41
29.04	4	5	39
29.06	4	6	35
29.08	3	8	29
29.1	4	7	22
29.12	5	7	24
29.14	5	5	27
29.16	3	8	30
29.18	3	7	34
29.2	4	10	31
29.22	3	11	24
29.24	3	9	27
29.26	3	10	38
29.28	3	8	43
29.3	5	7	40
29.32	4	9	31
29.34	2	7	28
29.36	3	9	30
29.38	7	13	33
29.4	5	9	29
29.42	3	4	28
29.44	2	4	29
29.46	2	7	27
29.48	3	7	32
29.5	4	8	26
29.52	6	14	26
29.54	5	13	38
29.56	2	11	31
29.58	2	9	27
29.6	2	10	32
29.62	6	10	37
29.64	6	8	38
29.66	4	10	31
29.68	3	8	27
29.7	4	8	29
29.72	5	7	32
29.74	4	5	33
29.76	3	7	31
29.78	6	10	33
29.8	5	10	42
29.82	3	7	34
29.84	4	4	25
29.86	5	7	31
29.88	3	11	30
29.9	2	11	24
29.92	3	9	20
29.94	2	5	24
29.96	5	6	33
29.98	4	9	37
30	4	10	35
30.02	5	11	30
30.04	4	10	25
30.06	4	8	31
30.08	4	6	44
30.1	3	7	41
30.12	4	9	29
30.14	2	10	29
30.16	2	9	36
30.18	4	11	40
30.2	3	16	36
30.22	4	12	30
30.24	4	5	30
30.26	4	5	30
30.28	4	8	36
30.3	5	9	44
30.32	4	8	39
30.34	3	8	31
30.36	4	8	32
30.38	3	8	30
30.4	3	7	20
30.42	4	6	24
30.44	3	8	34
30.46	3	8	27
30.48	3	10	27
30.5	4	10	27
30.52	2	10	25
30.54	3	10	26
30.56	5	9	29
30.58	4	8	32
30.6	4	8	34
30.62	5	7	36
30.64	4	8	30
30.66	2	8	25
30.68	1	9	30
30.7	3	10	39
30.72	3	6	38
30.74	1	10	31
30.76	1	15	31
30.78	3	13	34
30.8	4	8	33
30.82	4	8	24
30.84	3	7	21
30.86	2	8	27
30.88	3	10	32
30.9	4	8	33
30.92	3	5	29
30.94	3	6	27
30.96	5	7	32
30.98	4	8	33
31	7	10	34
31.02	7	8	39
31.04	6	4	37
31.06	4	5	32
31.08	0	7	34
31.1	2	8	31
31.12	4	12	28
31.14	5	12	27
31.16	5	10	32
31.18	4	8	38
31.2	5	5	32
31.22	5	4	28
31.24	5	6	24
31.26	5	7	26
31.28	4	10	31
31.3	2	10	32
31.32	2	9	35
31.34	3	8	32
31.36	4	7	33
31.38	4	8	29
31.4	3	9	23
31.42	5	10	30
31.44	5	8	33
31.46	4	9	31
31.48	5	11	32
31.5	7	11	33
31.52	6	8	27
31.54	5	8	31
31.56	6	10	43
31.58	6	7	39
31.6	5	6	34
31.62	6	9	33
31.64	8	8	36
31.66	10	9	38
31.68	11	11	37
31.7	11	10	37
31.72	15	11	36
31.74	16	15	32
31.76	15	16	27
31.78	16	12	31
31.8	18	12	31
31.82	18	11	29
31.84	24	9	36
31.86	26	9	30
31.88	21	11	22
31.9	24	10	30
31.92	28	11	33
31.94	19	12	34
31.96	12	8	33
31.98	17	6	29
32	18	9	33
32.02	13	10	32
32.04	10	9	33
32.06	11	9	35
32.08	11	12	31
32.1	11	10	29
32.12	7	9	31
32.14	7	10	28
32.16	9	7	34
32.18	7	7	36
32.2	6	7	31
32.22	5	7	28
32.24	4	8	25
32.26	6	10	30
32.28	6	7	37
32.3	5	6	36
32.32	5	11	40
32.34	5	14	40
32.36	6	14	38
32.38	7	14	37
32.4	7	13	37
32.42	4	12	35
32.44	5	10	26
32.46	5	11	28
32.48	7	9	37
32.5	7	8	37
32.52	5	9	34
32.54	4	10	33
32.56	8	8	36
32.58	10	8	35
32.6	6	10	25
32.62	4	9	33
32.64	4	8	38
32.66	6	9	38
32.68	7	12	43
32.7	9	12	45
32.72	8	9	52
32.74	8	8	52
32.76	8	9	40
32.78	8	8	48
32.8	10	9	51
32.82	7	8	48
32.84	7	8	43
32.86	6	12	42
32.88	8	12	46
32.9	8	12	41
32.92	7	13	42
32.94	7	16	50
32.96	9	15	45
32.98	7	15	42
33	7	13	39
33.02	13	8	36
33.04	13	12	38
33.06	6	12	42
33.08	7	8	49
33.1	9	12	45
33.12	9	17	40
33.14	8	18	39
33.16	9	19	36
33.18	8	17	39
33.2	7	13	32
33.22	7	18	36
33.24	8	15	39
33.26	6	13	38
33.28	6	15	36
33.3	8	14	38
33.32	7	12	38
33.34	6	11	29
33.36	7	12	30
33.38	5	10	29
33.4	5	7	31
33.42	9	10	32
33.44	8	12	34
33.46	6	10	39
33.48	5	7	37
33.5	7	9	29
33.52	7	11	31
33.54	5	10	31
33.56	6	9	28
33.58	8	10	28
33.6	6	7	29
33.62	3	9	31
33.64	4	7	36
33.66	6	6	36
33.68	4	9	28
33.7	3	11	28
33.72	4	12	32
33.74	5	11	29
33.76	5	9	30
33.78	4	11	27
33.8	7	14	26
33.82	7	9	34
33.84	5	5	41
33.86	8	9	35
33.88	7	11	31
33.9	5	12	35
33.92	7	11	31
33.94	7	12	26
33.96	5	9	25
33.98	4	8	34
34	6	11	32
34.02	6	9	22
34.04	6	10	29
34.06	5	8	28
34.08	2	9	30
34.1	4	11	38
34.12	3	9	40
34.14	3	7	35
34.16	4	8	32
34.18	5	9	38
34.2	4	13	36
34.22	5	13	34
34.24	3	15	34
34.26	4	13	32
34.28	2	13	37
34.3	4	9	33
34.32	4	8	33
34.34	5	11	38
34.36	6	9	31
34.38	5	9	27
34.4	5	10	30
34.42	3	9	28
34.44	3	11	29
34.46	2	11	34
34.48	1	14	29
34.5	3	10	28
34.52	4	9	35
34.54	3	13	36
34.56	6	10	30
34.58	5	10	30
34.6	4	10	29
34.62	4	8	30
34.64	1	8	40
34.66	2	8	37
34.68	2	6	26
34.7	2	7	35
34.72	4	7	36
34.74	3	10	29
34.76	2	10	33
34.78	3	9	32
34.8	5	10	32
34.82	4	9	37
34.84	4	10	31
34.86	5	12	29
34.88	5	9	33
34.9	7	8	32
34.92	5	14	33
34.94	4	10	35
34.96	4	8	36
34.98	1	8	33
35	3	8	37
35.02	5	6	39
35.04	5	7	31
35.06	4	8	35
35.08	4	9	39
35.1	3	9	41
35.12	3	12	38
35.14	4	12	35
35.16	6	10	46
35.18	4	8	49
35.2	7	12	43
35.22	8	14	40
35.24	3	10	46
35.26	2	7	52
35.28	5	8	47
35.3	4	15	46
35.32	3	13	53
35.34	4	14	45
35.36	6	12	36
35.38	2	11	38
35.4	1	10	37
35.42	5	9	48
35.44	5	8	35
35.46	3	8	41
35.48	3	7	39
35.5	4	9	31
35.52	5	11	42
35.54	4	11	45
35.56	3	18	35
35.58	4	21	34
35.6	3	13	28
35.62	3	18	30
35.64	4	12	40
35.66	7	12	44
35.68	4	13	42
35.7	4	16	34
35.72	5	15	36
35.74	3	17	36
35.76	4	16	30
35.78	4	10	34
35.8	5	13	33
35.82	5	12	33
35.84	4	13	39
35.86	5	12	33
35.88	7	14	34
35.9	6	16	24
35.92	4	9	27
35.94	8	9	27
35.96	8	11	38
35.98	6	10	33
36	4	10	41
36.02	3	16	34
36.04	6	10	35
36.06	6	12	38
36.08	6	12	36
36.1	4	9	33
36.12	6	10	28
36.14	5	10	37
36.16	6	8	36
36.18	5	8	33
36.2	5	7	29
36.22	8	11	30
36.24	6	8	39
36.26	7	9	43
36.28	10	8	33
36.3	9	9	29
36.32	5	9	27
36.34	5	10	25
36.36	4	8	24
36.38	4	11	29
36.4	6	4	30
36.42	8	6	36
36.44	10	8	34
36.46	9	8	39
36.48	9	6	36
36.5	10	6	42
36.52	6	9	34
36.54	6	11	27
36.56	7	10	27
36.58	7	10	23
36.6	6	11	36
36.62	9	9	37
36.64	7	5	35
36.66	5	6	35
36.68	5	10	27
36.7	9	13	31
36.72	8	11	33
36.74	6	8	41
36.76	5	10	39
36.78	6	13	26
36.8	6	14	32
36.82	5	12	25
36.84	7	11	35
36.86	12	12	36
36.88	9	9	37
36.9	5	6	36
36.92	8	10	36
36.94	9	14	36
36.96	9	14	40
36.98	6	11	35
37	6	12	44
37.02	10	9	32
37.04	11	6	35
37.06	11	8	35
37.08	9	13	35
37.1	14	7	28
37.12	12	11	32
37.14	11	14	32
37.16	12	10	34
37.18	7	6	31
37.2	9	3	37
37.22	11	9	37
37.24	10	7	27
37.26	11	10	31
37.28	12	9	29
37.3	9	7	25
37.32	13	7	23
37.34	15	10	34
37.36	12	11	34
37.38	14	8	39
37.4	11	6	36
37.42	17	10	28
37.44	15	9	31
37.46	12	15	30
37.48	15	11	33
37.5	12	6	33
37.52	8	11	26
37.54	11	12	28
37.56	17	12	28
37.58	19	12	30
37.6	12	8	33
37.62	18	9	33
37.64	17	7	29
37.66	13	11	38
37.68	17	13	34
37.7	19	1	37
37.72	19	3	26
37.74	14	8	24
37.76	17	9	31
37.78	18	10	31
37.8	13	13	26
37.82	18	11	33
37.84	17	9	33
37.86	19	11	21
37.88	18	12	26
37.9	17	12	34
37.92	19	13	26
37.94	19	22	31
37.96	17	17	34
37.98	17	26	38
38	12	27	31
38.02	16	36	38
38.04	13	37	34
38.06	11	42	27
38.08	15	38	28
38.1	11	44	33
38.12	12	43	27
38.14	17	56	27
38.16	15	55	18
38.18	16	55	25
38.2	10	46	34
38.22	8	56	42
38.24	8	56	27
38.26	13	52	36
38.28	11	47	45
38.3	14	36	38
38.32	6	31	31
38.34	7	32	33
38.36	8	32	29
38.38	9	25	33
38.4	17	20	30
38.42	11	24	32
38.44	9	16	35
38.46	10	19	39
38.48	10	14	32
38.5	10	18	32
38.52	15	10	40
38.54	15	10	31
38.56	7	11	34
38.58	8	9	32
38.6	11	8	52
38.62	8	9	34
38.64	7	8	25
38.66	13	12	29
38.68	11	12	27
38.7	12	11	35
38.72	7	11	42
38.74	11	11	30
38.76	7	8	31
38.78	9	7	33
38.8	7	5	39
38.82	9	8	32
38.84	6	14	35
38.86	4	14	42
38.88	6	14	42
38.9	9	11	39
38.92	3	6	32
38.94	6	7	35
38.96	11	9	37
38.98	12	14	30
39	6	7	31
39.02	7	10	31
39.04	3	14	41
39.06	8	7	34
39.08	6	7	41
39.1	2	8	30
39.12	3	8	35
39.14	10	9	37
39.16	7	7	30
39.18	9	10	32
39.2	6	5	30
39.22	4	12	36
39.24	7	8	30
39.26	7	11	38
39.28	4	12	29
39.3	2	8	30
39.32	7	9	33
39.34	15	9	39
39.36	5	13	34
39.38	5	12	25
39.4	6	10	37
39.42	8	6	33
39.44	5	3	47
39.46	5	7	37
39.48	5	11	36
39.5	4	13	35
39.52	6	11	39
39.54	4	9	40
39.56	5	12	30
39.58	8	10	33
39.6	5	8	31
39.62	7	9	29
39.64	8	12	34
39.66	8	16	32
39.68	8	9	27
39.7	2	10	40
39.72	6	8	26
39.74	3	9	35
39.76	4	12	33
39.78	4	11	32
39.8	6	9	23
39.82	4	12	38
39.84	5	9	24
39.86	4	11	21
39.88	7	13	37
39.9	9	6	28
39.92	8	11	38
39.94	5	8	27
39.96	4	8	26
39.98	4	13	29
40	6	12	29
40.02	2	14	33
40.04	5	11	34
40.06	5	11	40
40.08	2	11	47
40.1	3	4	31
40.12	6	13	43
40.14	5	8	26
40.16	4	8	42
40.18	2	12	36
40.2	2	9	41
40.22	7	9	37
40.24	3	7	28
40.26	4	7	29
40.28	3	8	41
40.3	5	8	39
40.32	6	8	39
40.34	4	9	29
40.36	5	12	44
40.38	4	10	38
40.4	4	6	28
40.42	5	9	37
40.44	6	12	39
40.46	0	9	30
40.48	4	10	47
40.5	3	9	43
40.52	1	13	36
40.54	4	8	32
40.56	6	11	31
40.58	3	14	45
40.6	1	11	39
40.62	4	7	39
40.64	4	11	37
40.66	4	9	35
40.68	8	9	33
40.7	4	7	42
40.72	3	9	41
40.74	6	9	37
40.76	5	10	30
40.78	4	7	32
40.8	6	12	43
40.82	1	9	41
40.84	4	10	38
40.86	3	14	43
40.88	4	15	30
40.9	1	16	29
40.92	9	15	32
40.94	5	12	32
40.96	4	10	36
40.98	5	10	36
41	7	9	41
41.02	4	9	39
41.04	6	8	33
41.06	3	13	37
41.08	2	15	32
41.1	7	13	34
41.12	8	8	31
41.14	3	13	35
41.16	4	10	31
41.18	6	9	34
41.2	6	13	30
41.22	6	7	36
41.24	6	10	29
41.26	4	10	28
41.28	8	14	23
41.3	4	9	29
41.32	6	6	35
41.34	4	10	30
41.36	5	4	33
41.38	4	8	42
41.4	5	10	33
41.42	4	9	33
41.44	5	12	35
41.46	5	9	38
41.48	6	9	34
41.5	6	10	27
41.52	3	9	43
41.54	1	8	37
41.56	1	11	35
41.58	6	16	34
41.6	5	7	34
41.62	3	12	32
41.64	8	11	35
41.66	7	6	39
41.68	3	9	35
41.7	4	10	34
41.72	6	14	27
41.74	5	9	31
41.76	3	15	31
41.78	8	7	37
41.8	8	14	29
41.82	3	11	38
41.84	8	10	27
41.86	5	13	31
41.88	4	7	36
41.9	5	7	28
41.92	1	7	29
41.94	3	7	20
41.96	8	6	42
41.98	6	10	36
42	6	7	28
42.02	6	14	23
42.04	4	6	31
42.06	3	9	29
42.08	4	6	39
42.1	7	12	32
42.12	4	10	36
42.14	10	8	29
42.16	6	9	30
42.18	2	12	38
42.2	4	4	34
42.22	4	9	42
42.24	3	11	32
42.26	9	8	23
42.28	6	13	28
42.3	4	7	32
42.32	5	9	30
42.34	7	5	36
42.36	4	5	39
42.38	4	8	33
42.4	8	4	31
42.42	11	8	28
42.44	8	4	35
42.46	6	12	41
42.48	7	5	29
42.5	4	11	38
42.52	6	9	28
42.54	8	14	38
42.56	6	9	36
42.58	6	8	32
42.6	3	6	29
42.62	4	13	36
42.64	10	9	33
42.66	2	4	25
42.68	2	14	35
42.7	9	7	36
42.72	2	11	37
42.74	7	15	30
42.76	3	5	34
42.78	4	13	31
42.8	1	10	22
42.82	4	4	30
42.84	4	6	32
42.86	10	10	41
42.88	6	5	30
42.9	4	5	35
42.92	0	9	20
42.94	8	4	28
42.96	2	9	37
[truncated: 2,352 more rows]

## Sheet: FTIR
	AgFe	Fe	Ag
3997.43	0.97802	0.99561	0.89586
3996.02	0.97806	0.99527	0.89581
3994.6	0.97824	0.99516	0.89572
3993.18	0.97847	0.99532	0.89564
3991.77	0.97859	0.99554	0.89556
3990.35	0.97856	0.9956	0.89535
3988.93	0.97852	0.99551	0.89495
3987.52	0.97854	0.99541	0.89455
3986.1	0.97857	0.99542	0.89428
3984.68	0.97859	0.99555	0.89417
3983.27	0.97872	0.99579	0.89425
3981.85	0.979	0.99611	0.89461
3980.43	0.97924	0.9964	0.89519
3979.02	0.97931	0.99651	0.89576
3977.6	0.97927	0.99636	0.89612
3976.18	0.97927	0.99612	0.89621
3974.77	0.97928	0.99588	0.89606
3973.35	0.97917	0.99563	0.89586
3971.94	0.97884	0.99532	0.8959
3970.52	0.9784	0.99499	0.89625
3969.1	0.97811	0.99481	0.89663
3967.69	0.9782	0.99492	0.89662
3966.27	0.97861	0.99525	0.89616
3964.85	0.97903	0.9956	0.89563
3963.44	0.97921	0.99577	0.89534
3962.02	0.97918	0.99583	0.89521
3960.6	0.97915	0.99584	0.89503
3959.19	0.97923	0.99581	0.89482
3957.77	0.97934	0.99582	0.89474
3956.35	0.97932	0.99604	0.8948
3954.94	0.97909	0.99641	0.89489
3953.52	0.97871	0.99664	0.89499
3952.1	0.97832	0.9965	0.89518
3950.69	0.97802	0.99605	0.89547
3949.27	0.97782	0.99561	0.89563
3947.85	0.97771	0.9954	0.89542
3946.44	0.97775	0.99524	0.89506
3945.02	0.97795	0.99483	0.89511
3943.6	0.97829	0.99439	0.89566
3942.19	0.97864	0.99452	0.89617
3940.77	0.97892	0.99519	0.89625
3939.36	0.9791	0.99582	0.89599
3937.94	0.97912	0.99608	0.89557
3936.52	0.97899	0.99596	0.89513
3935.11	0.97879	0.99531	0.895
3933.69	0.97863	0.99417	0.8953
3932.27	0.97848	0.99323	0.8957
3930.86	0.97828	0.9932	0.89579
3929.44	0.97803	0.994	0.89556
3928.02	0.97788	0.99476	0.89539
3926.61	0.97797	0.99487	0.89557
3925.19	0.97827	0.99476	0.89586
3923.77	0.97863	0.99507	0.89588
3922.36	0.9789	0.99558	0.89573
3920.94	0.97903	0.99556	0.89584
3919.52	0.97909	0.99488	0.89629
3918.11	0.97912	0.99414	0.89669
3916.69	0.97911	0.99399	0.89659
3915.27	0.97909	0.99447	0.89602
3913.86	0.9791	0.99509	0.89544
3912.44	0.97912	0.99557	0.89518
3911.02	0.97907	0.99611	0.895
3909.61	0.97894	0.99677	0.89459
3908.19	0.97891	0.99704	0.89414
3906.78	0.97908	0.99644	0.89405
3905.36	0.97931	0.99534	0.89431
3903.94	0.97923	0.99462	0.89462
3902.53	0.97872	0.99437	0.89512
3901.11	0.97815	0.99403	0.89618
3899.69	0.97797	0.99377	0.89721
3898.28	0.97822	0.99438	0.89712
3896.86	0.97863	0.99564	0.89601
3895.44	0.97893	0.99629	0.89507
3894.03	0.97901	0.99559	0.89521
3892.61	0.9789	0.99446	0.89587
3891.19	0.97871	0.99464	0.8957
3889.78	0.9786	0.99615	0.89464
3888.36	0.9786	0.99702	0.89431
3886.94	0.97864	0.99642	0.89528
3885.53	0.97859	0.99574	0.89598
3884.11	0.97851	0.99574	0.89553
3882.69	0.97854	0.99517	0.8953
3881.28	0.97878	0.99384	0.8961
3879.86	0.97915	0.99358	0.89654
3878.44	0.9795	0.99481	0.89573
3877.03	0.97964	0.99572	0.89483
3875.61	0.97952	0.99545	0.89471
3874.2	0.97931	0.99506	0.89485
3872.78	0.97919	0.99508	0.89501
3871.36	0.9791	0.995	0.89557
3869.95	0.97874	0.99529	0.89578
3868.53	0.97807	0.99636	0.89489
3867.11	0.97734	0.99686	0.89411
3865.7	0.97685	0.99575	0.89481
3864.28	0.97667	0.99436	0.89621
3862.86	0.97683	0.99425	0.89677
3861.45	0.97737	0.99537	0.89599
3860.03	0.97822	0.99687	0.89439
3858.61	0.97919	0.99783	0.8929
3857.2	0.98009	0.99713	0.89279
3855.78	0.98072	0.99422	0.89472
3854.36	0.98077	0.99092	0.89751
3852.95	0.9802	0.99055	0.89867
3851.53	0.97944	0.99353	0.89764
3850.11	0.97904	0.99682	0.89607
3848.7	0.97905	0.99828	0.89511
3847.28	0.97922	0.99794	0.89481
3845.86	0.97929	0.99673	0.89492
3844.45	0.97919	0.99574	0.89509
3843.03	0.97905	0.99564	0.89515
3841.62	0.97906	0.99592	0.89561
3840.2	0.97925	0.9956	0.897
3838.78	0.97939	0.99486	0.89856
3837.37	0.97925	0.9947	0.89894
3835.95	0.97897	0.99525	0.89803
3834.53	0.97888	0.99565	0.89705
3833.12	0.97919	0.99552	0.89667
3831.7	0.97977	0.99543	0.89639
3830.28	0.98026	0.99568	0.89587
3828.87	0.98036	0.99584	0.89549
3827.45	0.97998	0.99595	0.89523
3826.03	0.97937	0.9964	0.89459
3824.62	0.97884	0.99644	0.89414
3823.2	0.97849	0.99503	0.89516
3821.78	0.97821	0.99351	0.89687
3820.37	0.97803	0.99414	0.89713
3818.95	0.97811	0.99558	0.89652
3817.53	0.97843	0.99523	0.89708
3816.12	0.97873	0.99395	0.89826
3814.7	0.97884	0.99422	0.89808
3813.28	0.97889	0.99591	0.8966
3811.87	0.97909	0.99715	0.89536
3810.45	0.97949	0.99694	0.89525
3809.04	0.97991	0.99564	0.89607
3807.62	0.98003	0.99464	0.8966
3806.2	0.97973	0.995	0.8957
3804.79	0.9793	0.99543	0.89452
3803.37	0.97915	0.99402	0.89523
3801.95	0.97934	0.99213	0.89712
3800.54	0.97948	0.99239	0.89778
3799.12	0.97924	0.99406	0.89731
3797.7	0.97866	0.99481	0.8974
3796.29	0.9781	0.99464	0.89799
3794.87	0.97782	0.99481	0.89802
3793.45	0.97789	0.99528	0.89755
3792.04	0.97822	0.99548	0.89726
3790.62	0.97867	0.99543	0.89722
3789.2	0.97913	0.9953	0.89723
3787.79	0.97951	0.99496	0.89736
3786.37	0.97978	0.99448	0.89764
3784.95	0.97995	0.99443	0.89782
3783.54	0.9801	0.99485	0.89782
3782.12	0.98026	0.99487	0.8982
3780.7	0.98036	0.99403	0.89905
3779.29	0.98027	0.99333	0.89942
3777.87	0.98001	0.99371	0.89862
3776.45	0.97976	0.99472	0.89735
3775.04	0.97966	0.99545	0.89652
3773.62	0.97972	0.99545	0.89644
3772.21	0.97984	0.9947	0.89709
3770.79	0.97987	0.99391	0.89798
3769.37	0.97971	0.99396	0.8984
3767.96	0.97943	0.99455	0.8984
3766.54	0.97923	0.99492	0.89831
3765.12	0.97923	0.99531	0.89774
3763.71	0.97946	0.99588	0.89666
3762.29	0.97977	0.99579	0.89613
3760.87	0.97997	0.99473	0.89679
3759.46	0.97995	0.99395	0.89766
3758.04	0.97983	0.99465	0.89733
3756.62	0.97986	0.99637	0.89579
3755.21	0.98014	0.99737	0.89449
3753.79	0.98043	0.99653	0.89491
3752.37	0.98037	0.9947	0.89688
3750.96	0.97992	0.9942	0.89828
3749.54	0.97944	0.99612	0.89734
3748.12	0.97931	0.99804	0.89557
3746.71	0.97948	0.99701	0.89597
3745.29	0.97967	0.99403	0.89852
3743.87	0.97967	0.99312	0.89984
3742.46	0.97953	0.99519	0.89845
3741.04	0.97941	0.99734	0.89632
3739.63	0.97929	0.9975	0.89538
3738.21	0.97902	0.99595	0.89597
3736.79	0.97854	0.99402	0.89743
3735.38	0.97803	0.99294	0.8987
3733.96	0.97779	0.99309	0.89914
3732.54	0.97796	0.99408	0.89864
3731.13	0.97842	0.99549	0.8975
3729.71	0.97898	0.99651	0.8966
3728.29	0.97944	0.99643	0.89677
3726.88	0.97962	0.99564	0.89772
3725.46	0.97942	0.99503	0.89852
3724.04	0.97892	0.99474	0.89893
3722.63	0.9784	0.99453	0.89922
3721.21	0.97809	0.99445	0.8994
3719.79	0.97815	0.9947	0.89928
3718.38	0.97853	0.99531	0.89866
3716.96	0.97909	0.99604	0.89766
3715.54	0.97955	0.99617	0.89703
3714.13	0.97971	0.99503	0.8977
3712.71	0.9795	0.99321	0.89955
3711.29	0.97909	0.99226	0.90108
3709.88	0.97877	0.99302	0.90104
3708.46	0.97876	0.99468	0.89976
3707.05	0.97905	0.99597	0.89841
3705.63	0.97953	0.9961	0.89797
3704.21	0.98004	0.99505	0.89878
3702.8	0.98041	0.99375	0.90017
3701.38	0.98052	0.99348	0.90085
3699.96	0.98044	0.99425	0.90045
3698.55	0.98034	0.99499	0.89969
3697.13	0.98035	0.99522	0.89903
3695.71	0.98049	0.99538	0.89826
3694.3	0.98061	0.99554	0.89758
3692.88	0.98055	0.99506	0.89788
3691.46	0.98027	0.99371	0.89957
3690.05	0.97992	0.99235	0.90168
3688.63	0.9797	0.99231	0.90245
3687.21	0.97966	0.99371	0.90142
3685.8	0.97968	0.99521	0.89991
3684.38	0.97974	0.9958	0.89914
3682.96	0.97986	0.9957	0.89897
3681.55	0.98009	0.99566	0.89876
3680.13	0.98045	0.99588	0.89846
3678.71	0.98086	0.99561	0.89894
3677.3	0.98107	0.99441	0.90054
3675.88	0.9808	0.99394	0.9015
3674.47	0.98007	0.99569	0.90017
3673.05	0.97923	0.99738	0.89869
3671.63	0.97861	0.99624	0.89986
3670.22	0.97841	0.99379	0.90244
3668.8	0.97869	0.99336	0.90312
3667.38	0.97929	0.99483	0.90167
3665.97	0.97988	0.99586	0.90031
3664.55	0.98021	0.99562	0.90009
3663.13	0.98027	0.99496	0.90033
3661.72	0.98019	0.99467	0.90021
3660.3	0.98013	0.99457	0.89988
3658.88	0.98017	0.994	0.90019
3657.47	0.9803	0.99333	0.90107
3656.05	0.98045	0.99392	0.90105
3654.63	0.98053	0.99574	0.89955
3653.22	0.98051	0.99655	0.89827
3651.8	0.98034	0.99472	0.899
3650.38	0.97984	0.99174	0.90125
3648.97	0.97899	0.99055	0.90298
3647.55	0.9782	0.99192	0.90319
3646.13	0.97791	0.99418	0.90231
3644.72	0.97819	0.99548	0.90134
3643.3	0.97872	0.99536	0.90103
3641.89	0.9792	0.99457	0.90122
3640.47	0.97949	0.99398	0.90136
3639.05	0.97955	0.99385	0.90117
3637.64	0.97944	0.99398	0.9008
3636.22	0.97929	0.99416	0.90048
3634.8	0.97926	0.99449	0.90014
3633.39	0.97944	0.99484	0.89978
3631.97	0.97983	0.99419	0.90038
3630.55	0.98022	0.992	0.90257
3629.14	0.98034	0.9902	0.90467
3627.72	0.98013	0.99118	0.9043
3626.3	0.97986	0.99397	0.90194
3624.89	0.97981	0.99597	0.89986
3623.47	0.97998	0.99605	0.89916
3622.05	0.98013	0.99469	0.89971
3620.64	0.97994	0.99303	0.9008
3619.22	0.97939	0.99249	0.90132
3617.8	0.9788	0.99355	0.90076
3616.39	0.97856	0.99489	0.90006
3614.97	0.97873	0.99519	0.9003
3613.55	0.9791	0.99491	0.90109
3612.14	0.97942	0.99488	0.90166
3610.72	0.97957	0.99477	0.90215
3609.31	0.97961	0.99407	0.9028
3607.89	0.97966	0.9934	0.90289
3606.47	0.97979	0.99347	0.90183
3605.06	0.97999	0.99387	0.90047
3603.64	0.98015	0.99382	0.90002
3602.22	0.98017	0.99334	0.90058
3600.81	0.98002	0.99313	0.90122
3599.39	0.97981	0.99351	0.90133
3597.97	0.97969	0.99404	0.90128
3596.56	0.97968	0.9942	0.90165
3595.14	0.97968	0.9942	0.9022
3593.72	0.97959	0.99457	0.90207
3592.31	0.97949	0.99515	0.90119
3590.89	0.97943	0.99498	0.90065
3589.47	0.97937	0.99363	0.90138
3588.06	0.97927	0.99223	0.90273
3586.64	0.97925	0.99224	0.90324
3585.22	0.97936	0.9935	0.9026
3583.81	0.97949	0.99461	0.90183
3582.39	0.97942	0.99483	0.90168
3580.97	0.97915	0.99449	0.90196
3579.56	0.97884	0.99408	0.90219
3578.14	0.97867	0.99373	0.90222
3576.72	0.97868	0.99345	0.90218
3575.31	0.97886	0.99338	0.90208
3573.89	0.97915	0.99375	0.90166
3572.48	0.97946	0.99437	0.90086
3571.06	0.97962	0.99451	0.90028
3569.64	0.97947	0.99351	0.90064
3568.23	0.979	0.99187	0.90181
3566.81	0.97849	0.99116	0.90264
3565.39	0.97829	0.99211	0.90241
3563.98	0.97848	0.99358	0.90177
3562.56	0.97879	0.99423	0.90155
3561.14	0.97892	0.994	0.90176
3559.73	0.97881	0.99364	0.90191
3558.31	0.97865	0.99363	0.90173
3556.89	0.97866	0.99381	0.90139
3555.48	0.97885	0.99377	0.90128
3554.06	0.97907	0.99353	0.90151
3552.64	0.97916	0.99355	0.90169
3551.23	0.9791	0.99403	0.90144
3549.81	0.97897	0.99443	0.90104
3548.39	0.97884	0.99413	0.90106
3546.98	0.97876	0.99336	0.90154
3545.56	0.97874	0.99288	0.9019
3544.14	0.97879	0.99301	0.90178
3542.73	0.97887	0.99344	0.90134
3541.31	0.97896	0.99371	0.90099
3539.9	0.979	0.99358	0.90099
3538.48	0.97896	0.99315	0.90135
3537.06	0.97885	0.99278	0.90175
3535.65	0.97877	0.99282	0.90182
3534.23	0.97876	0.99325	0.90154
3532.81	0.97883	0.99368	0.90123
3531.4	0.97895	0.99382	0.90117
3529.98	0.97911	0.99369	0.90129
3528.56	0.97926	0.99354	0.90131
3527.15	0.9793	0.99351	0.90114
3525.73	0.97915	0.99351	0.90096
3524.31	0.97882	0.99339	0.90092
3522.9	0.97845	0.99324	0.90094
3521.48	0.9782	0.99318	0.90096
3520.06	0.97817	0.99321	0.90106
3518.65	0.97832	0.99332	0.90117
3517.23	0.97852	0.9935	0.90114
3515.81	0.97869	0.99373	0.90096
3514.4	0.97885	0.99389	0.90077
3512.98	0.97901	0.99386	0.90075
3511.56	0.9791	0.99363	0.90087
3510.15	0.97903	0.99338	0.90085
3508.73	0.97884	0.99335	0.90041
3507.32	0.97863	0.99334	0.89983
3505.9	0.97842	0.99292	0.89973
3504.48	0.97816	0.99222	0.90022
3503.07	0.97787	0.99196	0.90071
3501.65	0.9777	0.99252	0.90064
3500.23	0.97782	0.99334	0.90018
3498.82	0.97818	0.9937	0.89981
3497.4	0.97853	0.99349	0.89975
3495.98	0.97864	0.99316	0.89983
3494.57	0.97849	0.99307	0.8999
3493.15	0.97828	0.99316	0.89988
3491.73	0.9782	0.99312	0.8998
3490.32	0.97825	0.99285	0.89969
3488.9	0.97827	0.99258	0.89955
3487.48	0.97818	0.99265	0.89936
3486.07	0.97803	0.99302	0.8992
3484.65	0.978	0.99332	0.8993
3483.23	0.97814	0.99342	0.89968
3481.82	0.97841	0.99363	0.89996
3480.4	0.97861	0.99411	0.89987
3478.98	0.97864	0.99448	0.89965
3477.57	0.97854	0.99432	0.89967
3476.15	0.97843	0.99382	0.89991
3474.74	0.97842	0.99349	0.90005
3473.32	0.97851	0.9935	0.89996
3471.9	0.97861	0.99357	0.89971
3470.49	0.97866	0.99345	0.89948
3469.07	0.9787	0.99322	0.89929
3467.65	0.97871	0.99318	0.89911
3466.24	0.97864	0.99342	0.89893
3464.82	0.97844	0.99365	0.89882
3463.4	0.9782	0.99357	0.89884
3461.99	0.97803	0.9933	0.89895
3460.57	0.97796	0.99306	0.8991
3459.15	0.97793	0.99291	0.89928
3457.74	0.97794	0.99275	0.89941
3456.32	0.97807	0.99264	0.89932
3454.9	0.97833	0.99267	0.899
3453.49	0.97859	0.9929	0.89861
3452.07	0.97874	0.99328	0.89823
3450.65	0.97879	0.99357	0.89796
3449.24	0.97878	0.99346	0.89789
3447.82	0.97871	0.99308	0.89788
3446.4	0.97856	0.99287	0.89767
3444.99	0.97836	0.99287	0.89737
3443.57	0.97821	0.99276	0.89743
3442.16	0.97811	0.99263	0.89787
3440.74	0.97802	0.99275	0.89834
3439.32	0.978	0.99298	0.89858
3437.91	0.9781	0.99306	0.89852
3436.49	0.97823	0.99297	0.89821
3435.07	0.97823	0.99283	0.8978
3433.66	0.97812	0.99269	0.89758
3432.24	0.97797	0.99254	0.89767
3430.82	0.97783	0.99246	0.89795
3429.41	0.97775	0.9925	0.89811
3427.99	0.97781	0.99257	0.89795
3426.57	0.97801	0.99258	0.89752
3425.16	0.9782	0.99252	0.89709
3423.74	0.9783	0.99234	0.89694
3422.32	0.97836	0.99206	0.89711
3420.91	0.97838	0.99183	0.89732
3419.49	0.97829	0.99181	0.8973
3418.07	0.97804	0.99196	0.89715
3416.66	0.97774	0.99223	0.89705
3415.24	0.97754	0.99257	0.89704
3413.82	0.97749	0.99286	0.89696
3412.41	0.97761	0.99291	0.89677
3410.99	0.97789	0.9927	0.89658
3409.58	0.97826	0.9924	0.89653
3408.16	0.97847	0.99219	0.89656
3406.74	0.97832	0.99217	0.89648
3405.33	0.97793	0.99234	0.89624
3403.91	0.97763	0.99254	0.89602
3402.49	0.97759	0.99269	0.89597
3401.08	0.97777	0.9928	0.8961
3399.66	0.97802	0.99294	0.89638
3398.24	0.97813	0.99305	0.89666
3396.83	0.97804	0.99309	0.89682
3395.41	0.9778	0.99299	0.89683
3393.99	0.97756	0.99278	0.89675
3392.58	0.97741	0.99266	0.89658
3391.16	0.97734	0.99279	0.89634
3389.74	0.97736	0.99307	0.89614
3388.33	0.97749	0.99325	0.89612
3386.91	0.97773	0.9932	0.89628
3385.49	0.97801	0.99299	0.89646
3384.08	0.9782	0.99278	0.89649
3382.66	0.97824	0.99265	0.89631
3381.24	0.97812	0.99261	0.89603
3379.83	0.97789	0.99262	0.89585
3378.41	0.97767	0.99264	0.89586
3376.99	0.97762	0.99257	0.89595
3375.58	0.97774	0.99243	0.896
3374.16	0.97789	0.99231	0.89597
3372.75	0.97794	0.99229	0.89589
3371.33	0.97788	0.99235	0.89578
3369.91	0.9778	0.99242	0.89564
3368.5	0.97781	0.99244	0.89556
3367.08	0.97788	0.99242	0.89558
3365.66	0.97796	0.99237	0.89563
3364.25	0.97798	0.99227	0.89562
3362.83	0.97791	0.99214	0.89556
3361.41	0.97783	0.99208	0.89537
3360	0.97786	0.99211	0.89497
3358.58	0.97798	0.9921	0.89446
3357.16	0.97801	0.992	0.89406
3355.75	0.97784	0.99195	0.89396
3354.33	0.97763	0.99204	0.89411
3352.91	0.97762	0.99215	0.89428
3351.5	0.97779	0.99214	0.89432
3350.08	0.9779	0.99213	0.89429
3348.66	0.97776	0.99229	0.89437
3347.25	0.97746	0.99257	0.89453
3345.83	0.97719	0.99271	0.89459
3344.41	0.97711	0.9925	0.8944
3343	0.97724	0.99209	0.89402
3341.58	0.97749	0.99182	0.89367
3340.17	0.97778	0.9919	0.89357
3338.75	0.97805	0.99219	0.89376
3337.33	0.97822	0.99244	0.89403
3335.92	0.97823	0.99259	0.8941
3334.5	0.97811	0.99272	0.89399
3333.08	0.97794	0.99281	0.8939
3331.67	0.9778	0.9928	0.89392
3330.25	0.9777	0.99274	0.894
3328.83	0.97764	0.99273	0.89405
3327.42	0.97762	0.9928	0.89412
3326	0.97759	0.99287	0.89426
3324.58	0.97754	0.9929	0.89438
3323.17	0.97751	0.99288	0.89432
3321.75	0.97757	0.99279	0.89401
3320.33	0.97769	0.99262	0.8936
3318.92	0.97778	0.99243	0.89334
3317.5	0.97778	0.99232	0.89334
3316.08	0.97777	0.99234	0.89352
3314.67	0.97782	0.99242	0.89366
3313.25	0.97794	0.99248	0.89362
3311.83	0.97801	0.9925	0.8934
3310.42	0.97794	0.99247	0.8931
3309	0.97775	0.99236	0.89276
3307.59	0.97757	0.99217	0.89249
3306.17	0.97745	0.99195	0.8924
3304.75	0.97731	0.99179	0.89253
3303.34	0.97719	0.99179	0.89278
3301.92	0.97723	0.99186	0.89301
3300.5	0.97748	0.99189	0.89311
3299.09	0.97785	0.99187	0.89302
3297.67	0.97819	0.9919	0.89277
3296.25	0.97837	0.99202	0.89251
3294.84	0.97829	0.99219	0.89237
3293.42	0.97797	0.99232	0.89243
3292	0.97765	0.99242	0.89256
3290.59	0.97761	0.99248	0.89258
3289.17	0.97782	0.99254	0.89244
3287.75	0.97802	0.99255	0.89228
3286.34	0.97797	0.99246	0.89231
3284.92	0.97776	0.99224	0.89257
3283.5	0.97767	0.992	0.89293
3282.09	0.97784	0.99191	0.89317
3280.67	0.97809	0.99206	0.89317
3279.25	0.9782	0.99228	0.89293
3277.84	0.97815	0.99237	0.89252
3276.42	0.97804	0.99229	0.89207
3275.01	0.97796	0.99215	0.89175
3273.59	0.97792	0.99209	0.89162
3272.17	0.97789	0.99211	0.8916
3270.76	0.97787	0.99213	0.89161
3269.34	0.97793	0.99208	0.89166
3267.92	0.97809	0.99196	0.89172
3266.51	0.97828	0.99183	0.89177
3265.09	0.9784	0.99179	0.89183
3263.67	0.97841	0.99192	0.8919
3262.26	0.97832	0.99214	0.89194
3260.84	0.97813	0.99227	0.89189
3259.42	0.97785	0.99222	0.89179
3258.01	0.97758	0.99207	0.89173
3256.59	0.97743	0.99188	0.89168
3255.17	0.97742	0.99169	0.89156
3253.76	0.97747	0.99158	0.89134
3252.34	0.97749	0.99165	0.8911
3250.92	0.97749	0.99182	0.89092
3249.51	0.97757	0.99194	0.89085
3248.09	0.97777	0.99195	0.89095
3246.67	0.97807	0.99189	0.89116
3245.26	0.97836	0.99185	0.89131
3243.84	0.97852	0.99188	0.89127
3242.43	0.97847	0.9919	0.89112
3241.01	0.97824	0.99184	0.89101
3239.59	0.97793	0.99174	0.89096
3238.18	0.97765	0.99166	0.89092
3236.76	0.97745	0.99164	0.89085
3235.34	0.97738	0.99166	0.89081
3233.93	0.97749	0.99168	0.89091
3232.51	0.97767	0.99169	0.8912
3231.09	0.9778	0.99173	0.89154
3229.68	0.97785	0.9918	0.89174
3228.26	0.97794	0.99186	0.89168
3226.84	0.97812	0.99192	0.89138
3225.43	0.97828	0.99198	0.89105
3224.01	0.97825	0.99197	0.89089
3222.59	0.97799	0.99187	0.89092
3221.18	0.97767	0.99174	0.891
3219.76	0.97751	0.99168	0.89095
3218.34	0.97755	0.99169	0.89074
3216.93	0.97766	0.99171	0.8905
3215.51	0.97772	0.99169	0.89038
3214.09	0.9777	0.9917	0.89041
3212.68	0.97764	0.99176	0.89058
3211.26	0.97753	0.9918	0.89085
3209.85	0.97739	0.99181	0.89105
3208.43	0.97728	0.99185	0.89106
3207.01	0.97725	0.99185	0.89087
3205.6	0.97731	0.99174	0.89066
3204.18	0.97741	0.99163	0.89058
3202.76	0.97753	0.99163	0.8907
3201.35	0.97768	0.9917	0.89096
3199.93	0.97784	0.99167	0.89122
3198.51	0.97795	0.9915	0.89131
3197.1	0.97797	0.9913	0.89118
3195.68	0.97791	0.99119	0.89097
3194.26	0.97781	0.99117	0.8909
3192.85	0.97772	0.99114	0.89102
3191.43	0.97775	0.99108	0.89118
3190.01	0.97795	0.991	0.89129
3188.6	0.97823	0.99097	0.89132
3187.18	0.97846	0.99099	0.89127
3185.76	0.97856	0.99106	0.8912
3184.35	0.97851	0.99114	0.89123
3182.93	0.9783	0.99121	0.89143
3181.51	0.97798	0.9913	0.89169
3180.1	0.97773	0.99136	0.89179
3178.68	0.97768	0.99138	0.89165
3177.26	0.97773	0.99135	0.89141
3175.85	0.97773	0.99132	0.89127
3174.43	0.97759	0.99133	0.89126
3173.02	0.9774	0.99138	0.89129
3171.6	0.97733	0.9914	0.89126
3170.18	0.97744	0.99133	0.89119
3168.77	0.97764	0.99114	0.89115
3167.35	0.9778	0.99096	0.89116
3165.93	0.97784	0.99093	0.8912
3164.52	0.9778	0.99103	0.89121
3163.1	0.97776	0.99112	0.89122
3161.68	0.97775	0.99114	0.89124
3160.27	0.9778	0.99111	0.89123
3158.85	0.97786	0.99106	0.89112
3157.43	0.97791	0.99101	0.8909
3156.02	0.9779	0.99097	0.8907
3154.6	0.97784	0.99093	0.89061
3153.18	0.97774	0.9909	0.8906
3151.77	0.97764	0.99088	0.89059
3150.35	0.97758	0.99088	0.8906
3148.93	0.97758	0.9909	0.89072
3147.52	0.97768	0.99095	0.89098
3146.1	0.97789	0.99099	0.89126
3144.68	0.97816	0.99101	0.89134
3143.27	0.97842	0.99102	0.89117
3141.85	0.97855	0.99099	0.89089
3140.44	0.97848	0.99091	0.89075
3139.02	0.97829	0.9908	0.89082
3137.6	0.97812	0.99074	0.89099
3136.19	0.97805	0.99078	0.89114
3134.77	0.97805	0.99083	0.89128
3133.35	0.97805	0.99087	0.89138
3131.94	0.97805	0.99087	0.89135
3130.52	0.97811	0.99084	0.89121
3129.1	0.97821	0.99082	0.8911
3127.69	0.97824	0.99096	0.89112
3126.27	0.9782	0.99124	0.89125
3124.85	0.97813	0.99142	0.8914
3123.44	0.97804	0.99135	0.89146
3122.02	0.9779	0.99109	0.89137
3120.6	0.97777	0.99083	0.89119
3119.19	0.97779	0.99074	0.89104
3117.77	0.97796	0.99083	0.89098
3116.35	0.97818	0.99097	0.89095
3114.94	0.97836	0.99105	0.89093
3113.52	0.97846	0.99101	0.89096
3112.1	0.97845	0.99091	0.89101
3110.69	0.97831	0.99082	0.89101
3109.27	0.97811	0.99081	0.89092
3107.86	0.97798	0.99089	0.89084
3106.44	0.97798	0.99099	0.89087
3105.02	0.97809	0.99104	0.89104
3103.61	0.97823	0.99101	0.89127
3102.19	0.97826	0.99094	0.89144
3100.77	0.97818	0.99094	0.89146
3099.36	0.9781	0.99102	0.89141
3097.94	0.97811	0.99108	0.89143
3096.52	0.97819	0.99109	0.89152
3095.11	0.97829	0.99108	0.89155
3093.69	0.97838	0.99105	0.89142
3092.27	0.97848	0.99097	0.89129
3090.86	0.97855	0.99087	0.89132
3089.44	0.97857	0.99078	0.89152
3088.02	0.97857	0.99072	0.89174
3086.61	0.97852	0.9907	0.89177
3085.19	0.97839	0.99072	0.89154
3083.77	0.97824	0.99077	0.89113
3082.36	0.97821	0.99081	0.8908
3080.94	0.9783	0.99082	0.89077
3079.52	0.97835	0.99075	0.89101
3078.11	0.97827	0.99065	0.8913
3076.69	0.97815	0.99059	0.89149
3075.28	0.97813	0.99061	0.89161
3073.86	0.97823	0.99065	0.89179
3072.44	0.97831	0.99069	0.89201
3071.03	0.97831	0.99075	0.89211
3069.61	0.97825	0.9908	0.89198
3068.19	0.97819	0.9908	0.89171
3066.78	0.97816	0.99076	0.89153
3065.36	0.97815	0.99079	0.89161
3063.94	0.97819	0.99095	0.89186
3062.53	0.97828	0.99119	0.89205
3061.11	0.97836	0.99138	0.89204
3059.69	0.97842	0.99144	0.89189
3058.28	0.97853	0.9914	0.89174
3056.86	0.97873	0.99132	0.89164
3055.44	0.97901	0.99119	0.89157
3054.03	0.97921	0.99102	0.89155
3052.61	0.9792	0.99083	0.89163
3051.19	0.97899	0.99073	0.89179
3049.78	0.97869	0.99076	0.89192
3048.36	0.97844	0.99087	0.89194
3046.94	0.97831	0.99097	0.89185
3045.53	0.97833	0.99101	0.89171
3044.11	0.97849	0.99095	0.89166
3042.7	0.97868	0.99079	0.89179
3041.28	0.97881	0.99064	0.89204
3039.86	0.9788	0.99059	0.89226
3038.45	0.97866	0.99067	0.89232
3037.03	0.97845	0.99081	0.89226
3035.61	0.97827	0.99091	0.89221
3034.2	0.9782	0.99085	0.89227
3032.78	0.97821	0.99061	0.89238
3031.36	0.97825	0.99035	0.89247
3029.95	0.97834	0.99026	0.8925
3028.53	0.97853	0.99035	0.89252
3027.11	0.97876	0.99047	0.89251
3025.7	0.97891	0.9905	0.89242
3024.28	0.97889	0.99043	0.89225
3022.86	0.97877	0.99031	0.89213
3021.45	0.97868	0.99026	0.89212
3020.03	0.97868	0.9903	0.89221
3018.61	0.97874	0.99034	0.89235
3017.2	0.97878	0.99027	0.89249
3015.78	0.97878	0.99014	0.89258
3014.36	0.97874	0.99007	0.89264
3012.95	0.97874	0.99009	0.89272
3011.53	0.97879	0.99011	0.89285
3010.12	0.97884	0.99012	0.89302
3008.7	0.97887	0.99016	0.89314
3007.28	0.97891	0.99024	0.89316
3005.87	0.97897	0.99032	0.89314
3004.45	0.979	0.99041	0.89318
3003.03	0.97896	0.99048	0.89329
3001.62	0.97893	0.99045	0.8934
3000.2	0.97894	0.9903	0.89347
2998.78	0.97895	0.99009	0.89353
2997.37	0.97891	0.98998	0.89361
2995.95	0.97889	0.99001	0.89365
2994.53	0.97896	0.99006	0.8936
2993.12	0.97911	0.99001	0.89353
2991.7	0.97927	0.9899	0.89357
2990.28	0.97944	0.98983	0.89376
2988.87	0.97963	0.98984	0.89395
2987.45	0.97982	0.98987	0.89401
2986.03	0.97995	0.9898	0.89398
2984.62	0.98004	0.98968	0.89402
2983.2	0.98012	0.98958	0.8942
2981.78	0.98023	0.9895	0.89444
2980.37	0.98032	0.98945	0.89457
2978.95	0.9804	0.98943	0.89453
2977.53	0.98049	0.98947	0.89437
2976.12	0.9806	0.98952	0.89422
2974.7	0.98076	0.98954	0.89415
2973.29	0.98099	0.98957	0.89418
2971.87	0.98127	0.98958	0.89427
2970.45	0.98152	0.98951	0.89436
2969.04	0.98172	0.98936	0.8944
2967.62	0.98189	0.98929	0.89438
2966.2	0.98209	0.98939	0.89431
2964.79	0.98237	0.98959	0.89417
2963.37	0.9827	0.98969	0.89398
2961.95	0.98303	0.98962	0.89384
2960.54	0.98321	0.98947	0.89377
2959.12	0.98321	0.98941	0.89373
2957.7	0.9831	0.98948	0.89364
2956.29	0.98302	0.9896	0.89356
2954.87	0.98298	0.9897	0.89357
2953.45	0.98292	0.98976	0.89365
2952.04	0.9828	0.98981	0.89375
2950.62	0.98264	0.98987	0.89381
2949.2	0.98248	0.98993	0.89379
2947.79	0.98235	0.98995	0.8937
2946.37	0.98233	0.98989	0.89362
2944.95	0.98241	0.98982	0.89362
2943.54	0.9825	0.98979	0.89366
2942.12	0.98253	0.98981	0.89372
2940.71	0.98256	0.98982	0.89379
2939.29	0.98268	0.98979	0.89387
2937.87	0.98286	0.98975	0.89391
2936.46	0.98304	0.98968	0.89388
2935.04	0.98317	0.98958	0.89376
2933.62	0.98325	0.98945	0.89356
2932.21	0.9833	0.98938	0.89333
2930.79	0.98332	0.98942	0.89308
2929.37	0.98334	0.98959	0.89285
2927.96	0.9834	0.98979	0.89263
2926.54	0.98347	0.98991	0.8924
2925.12	0.98348	0.9899	0.89214
2923.71	0.98335	0.98983	0.8919
2922.29	0.98311	0.98979	0.89171
2920.87	0.9828	0.98981	0.89155
2919.46	0.98244	0.98983	0.89149
2918.04	0.98208	0.98981	0.89155
2916.62	0.98177	0.98973	0.89167
2915.21	0.9816	0.9897	0.89173
2913.79	0.98153	0.98974	0.89176
2912.37	0.98149	0.98974	0.89179
2910.96	0.98138	0.98959	0.89176
2909.54	0.98126	0.9894	0.89163
2908.13	0.98119	0.98933	0.89157
2906.71	0.98115	0.98945	0.89174
2905.29	0.98101	0.98965	0.89203
2903.88	0.98077	0.98977	0.89222
2902.46	0.98061	0.98978	0.89222
2901.04	0.98064	0.98978	0.89223
2899.63	0.98074	0.98982	0.89234
2898.21	0.98075	0.98987	0.89247
2896.79	0.98062	0.98985	0.89246
2895.38	0.98044	0.98976	0.89238
2893.96	0.98028	0.98968	0.89239
2892.54	0.98014	0.98963	0.89256
2891.13	0.98003	0.98959	0.89274
2889.71	0.97999	0.98952	0.89283
2888.29	0.98003	0.98941	0.89288
2886.88	0.98007	0.98933	0.89295
2885.46	0.98002	0.98929	0.89305
2884.04	0.97992	0.98925	0.89315
2882.63	0.9799	0.98926	0.89315
2881.21	0.98003	0.9894	0.89303
2879.79	0.98024	0.98965	0.89285
2878.38	0.98047	0.98987	0.89272
2876.96	0.98075	0.98989	0.89264
2875.55	0.98107	0.98971	0.89257
2874.13	0.98132	0.98948	0.89248
2872.71	0.98139	0.98936	0.8925
2871.3	0.98128	0.98937	0.89268
2869.88	0.98112	0.98942	0.89295
2868.46	0.9811	0.98944	0.89315
2867.05	0.98127	0.98943	0.89324
2865.63	0.98146	0.98941	0.89328
2864.21	0.98149	0.98937	0.89331
2862.8	0.98133	0.98933	0.89334
2861.38	0.98115	0.98935	0.89328
2859.96	0.98112	0.98943	0.89307
2858.55	0.98127	0.9895	0.89278
2857.13	0.98149	0.98953	0.89261
2855.71	0.98166	0.9895	0.89269
2854.3	0.98166	0.98944	0.89293
2852.88	0.98142	0.9894	0.89311
2851.46	0.98097	0.98946	0.8931
2850.05	0.98041	0.98961	0.89291
2848.63	0.97991	0.98971	0.89268
2847.21	0.97953	0.98966	0.89256
2845.8	0.97928	0.98954	0.89262
2844.38	0.97914	0.9895	0.89274
2842.97	0.97906	0.98958	0.89278
2841.55	0.979	0.98972	0.89273
2840.13	0.97898	0.98981	0.89268
2838.72	0.97905	0.98983	0.89271
2837.3	0.97913	0.9898	0.89281
2835.88	0.97912	0.98973	0.89287
2834.47	0.97898	0.98962	0.89285
2833.05	0.97879	0.98951	0.89286
2831.63	0.97869	0.98947	0.89298
2830.22	0.9787	0.98946	0.89318
2828.8	0.97875	0.9894	0.89335
2827.38	0.97878	0.98929	0.89345
2825.97	0.97882	0.9892	0.89346
2824.55	0.97889	0.98919	0.89342
2823.13	0.97894	0.98925	0.89337
2821.72	0.97897	0.98937	0.89338
2820.3	0.97899	0.98953	0.89347
2818.88	0.97903	0.9896	0.89356
2817.47	0.97911	0.98954	0.89362
2816.05	0.97921	0.98942	0.89372
2814.63	0.97928	0.98937	0.89387
2813.22	0.97923	0.98938	0.89397
2811.8	0.97906	0.98938	0.89392
2810.39	0.97886	0.98933	0.89378
2808.97	0.97877	0.98929	0.89374
2807.55	0.97883	0.98927	0.8939
2806.14	0.97896	0.98916	0.89415
2804.72	0.97897	0.98894	0.89439
2803.3	0.97884	0.98873	0.89457
2801.89	0.97874	0.98869	0.89469
2800.47	0.97883	0.98884	0.89469
2799.05	0.97905	0.98909	0.89458
2797.64	0.97926	0.98928	0.8944
2796.22	0.97933	0.98934	0.89423
2794.8	0.97927	0.98934	0.89414
2793.39	0.97911	0.98935	0.89411
2791.97	0.97895	0.98934	0.89406
2790.55	0.97886	0.98927	0.89399
2789.14	0.97887	0.9892	0.89401
2787.72	0.97894	0.98918	0.89418
2786.3	0.97904	0.98919	0.89448
2784.89	0.97919	0.98917	0.89479
2783.47	0.97933	0.98913	0.89501
2782.05	0.97939	0.98911	0.89509
2780.64	0.97936	0.98911	0.89506
2779.22	0.97929	0.98911	0.89502
2777.81	0.97922	0.98903	0.895
2776.39	0.97911	0.98892	0.89493
2774.97	0.979	0.98887	0.8948
2773.56	0.97894	0.98893	0.89466
2772.14	0.97893	0.98903	0.8946
2770.72	0.97892	0.98911	0.89463
2769.31	0.97889	0.98913	0.89472
2767.89	0.97893	0.98904	0.89484
2766.47	0.97911	0.98888	0.89492
2765.06	0.97938	0.98874	0.89497
2763.64	0.97959	0.9887	0.89498
2762.22	0.97961	0.98871	0.89494
2760.81	0.97944	0.98866	0.89491
2759.39	0.97918	0.98858	0.89492
2757.97	0.97894	0.9886	0.89499
2756.56	0.97886	0.98874	0.89503
2755.14	0.97899	0.98885	0.89497
2753.72	0.97927	0.98883	0.89484
2752.31	0.97945	0.98874	0.89482
2750.89	0.97936	0.9887	0.89501
2749.47	0.97912	0.98874	0.89526
2748.06	0.97898	0.98876	0.89534
2746.64	0.97904	0.98873	0.89528
2745.22	0.97917	0.98869	0.89528
2743.81	0.97925	0.9887	0.89544
2742.39	0.97926	0.9887	0.89565
2740.98	0.97929	0.98866	0.89578
2739.56	0.97937	0.9886	0.89576
2738.14	0.97949	0.98858	0.89557
2736.73	0.97959	0.98856	0.89536
2735.31	0.9796	0.98852	0.8953
2733.89	0.97946	0.9885	0.89544
2732.48	0.97923	0.98851	0.89562
2731.06	0.97911	0.98852	0.89567
2729.64	0.97918	0.98847	0.89558
2728.23	0.97932	0.98837	0.89546
2726.81	0.97938	0.9883	0.89537
2725.39	0.97935	0.98831	0.89535
2723.98	0.97933	0.98835	0.89539
2722.56	0.97942	0.98843	0.8955
2721.14	0.97961	0.98858	0.89564
2719.73	0.97975	0.98877	0.89576
2718.31	0.97972	0.98888	0.8958
2716.89	0.97959	0.98881	0.89579
2715.48	0.97952	0.98857	0.89582
2714.06	0.97963	0.98832	0.89595
2712.64	0.97984	0.98825	0.89611
2711.23	0.97996	0.98839	0.89617
2709.81	0.97989	0.98861	0.89611
2708.4	0.97968	0.98875	0.89602
2706.98	0.97946	0.98875	0.89597
2705.56	0.97931	0.98871	0.89595
2704.15	0.97925	0.98868	0.89595
2702.73	0.97926	0.98866	0.89595
2701.31	0.9793	0.98859	0.89599
2699.9	0.97933	0.98853	0.89607
2698.48	0.97927	0.98857	0.89617
2697.06	0.97913	0.98867	0.89625
2695.65	0.97898	0.98872	0.8963
2694.23	0.97891	0.98865	0.89629
2692.81	0.97891	0.9885	0.89624
2691.4	0.97893	0.98833	0.89619
2689.98	0.97898	0.98818	0.89618
2688.56	0.97909	0.98813	0.89621
2687.15	0.97919	0.98822	0.89625
2685.73	0.97923	0.98834	0.89628
2684.31	0.97923	0.98836	0.89629
2682.9	0.97924	0.98829	0.89633
2681.48	0.97928	0.98825	0.89641
2680.06	0.97929	0.98826	0.8965
2678.65	0.97929	0.98822	0.89661
2677.23	0.97933	0.9881	0.89667
2675.82	0.97944	0.98799	0.89663
2674.4	0.97954	0.98796	0.89648
2672.98	0.97956	0.98797	0.89625
2671.57	0.97954	0.98797	0.89609
2670.15	0.9795	0.98799	0.89612
2668.73	0.97941	0.98809	0.89634
2667.32	0.97931	0.98826	0.89658
2665.9	0.9793	0.9884	0.89666
2664.48	0.97949	0.98838	0.89661
2663.07	0.97976	0.9882	0.89654
2661.65	0.97989	0.98797	0.89646
2660.23	0.97975	0.98783	0.89636
2658.82	0.97949	0.98781	0.89625
2657.4	0.97933	0.9879	0.89618
2655.98	0.9794	0.98801	0.89617
2654.57	0.9796	0.98812	0.89627
2653.15	0.97974	0.9882	0.89647
2651.73	0.97968	0.98826	0.89668
2650.32	0.97947	0.98827	0.89677
2648.9	0.97928	0.98818	0.89675
2647.48	0.97926	0.98802	0.89672
2646.07	0.97941	0.98782	0.89676
2644.65	0.9796	0.98768	0.89683
2643.24	0.9797	0.98765	0.89688
2641.82	0.97973	0.98777	0.89695
2640.4	0.97975	0.98801	0.89706
2638.99	0.97982	0.98822	0.89717
2637.57	0.97982	0.98831	0.89721
2636.15	0.9797	0.98829	0.89717
2634.74	0.97955	0.98826	0.89709
2633.32	0.97951	0.98824	0.89705
2631.9	0.97957	0.98823	0.89713
2630.49	0.97966	0.98823	0.8973
2629.07	0.9797	0.98825	0.89738
2627.65	0.97968	0.98825	0.89719
2626.24	0.9796	0.98823	0.89683
2624.82	0.97946	0.98821	0.89657
2623.4	0.97929	0.9882	0.89655
2621.99	0.9792	0.98819	0.89671
2620.57	0.97922	0.98818	0.8969
2619.15	0.97929	0.98817	0.89705
2617.74	0.97932	0.98818	0.89718
2616.32	0.97929	0.98824	0.89729
2614.9	0.97924	0.98835	0.89739
2613.49	0.97924	0.98843	0.89747
2612.07	0.97931	0.98842	0.89756
2610.66	0.97939	0.9883	0.89768
2609.24	0.97949	0.98817	0.89779
2607.82	0.9796	0.98815	0.89782
2606.41	0.97967	0.9882	0.89775
2604.99	0.97963	0.98826	0.89766
2603.57	0.97949	0.98831	0.89764
2602.16	0.97941	0.98837	0.89768
2600.74	0.97949	0.9884	0.8977
2599.32	0.97969	0.98836	0.89766
2597.91	0.9799	0.98827	0.89758
2596.49	0.98001	0.9882	0.89757
2595.07	0.98	0.98822	0.89764
2593.66	0.9799	0.98829	0.89771
2592.24	0.97977	0.98828	0.89772
2590.82	0.97963	0.9882	0.89768
2589.41	0.9795	0.98811	0.89766
2587.99	0.97939	0.98806	0.89771
2586.57	0.9793	0.98801	0.89781
2585.16	0.97923	0.9879	0.89792
2583.74	0.97917	0.98774	0.89796
2582.32	0.97917	0.98761	0.89793
2580.91	0.97922	0.98757	0.89785
2579.49	0.97931	0.98761	0.89777
2578.08	0.97939	0.98767	0.89772
2576.66	0.97948	0.98771	0.89771
2575.24	0.97955	0.98768	0.89776
2573.83	0.97958	0.98761	0.89791
2572.41	0.97959	0.98753	0.89814
2570.99	0.97958	0.98752	0.89833
2569.58	0.97959	0.98757	0.89834
2568.16	0.97964	0.98764	0.89815
2566.74	0.97976	0.98769	0.8979
2565.33	0.97988	0.98774	0.89776
2563.91	0.97995	0.9878	0.89779
2562.49	0.97989	0.98788	0.89794
2561.08	0.97972	0.98794	0.89808
2559.66	0.97951	0.98797	0.89811
2558.24	0.97941	0.98797	0.89808
2556.83	0.97945	0.98794	0.89807
2555.41	0.97953	0.98789	0.89813
2553.99	0.9796	0.98782	0.89821
2552.58	0.97968	0.98772	0.89824
2551.16	0.97976	0.98757	0.89824
2549.74	0.97974	0.9874	0.89826
2548.33	0.97959	0.98728	0.8983
2546.91	0.97938	0.98723	0.89831
2545.49	0.97922	0.98728	0.89828
2544.08	0.97919	0.98738	0.89828
2542.66	0.97926	0.98744	0.89838
2541.25	0.97936	0.98747	0.89858
2539.83	0.97947	0.98748	0.89878
2538.41	0.97959	0.9875	0.89881
2537	0.97966	0.98752	0.89862
2535.58	0.97962	0.98753	0.89833
2534.16	0.97949	0.9875	0.89817
2532.75	0.9794	0.98741	0.89822
2531.33	0.97941	0.98728	0.89837
2529.91	0.97952	0.98719	0.89846
2528.5	0.97961	0.98717	0.89845
2527.08	0.97964	0.9872	0.89839
2525.66	0.97964	0.98725	0.89838
2524.25	0.97966	0.98731	0.89843
2522.83	0.97965	0.98739	0.8985
2521.41	0.97957	0.98744	0.89856
2520	0.97943	0.98743	0.89862
2518.58	0.97934	0.98734	0.89867
2517.16	0.97937	0.98719	0.89869
2515.75	0.97947	0.98706	0.8987
2514.33	0.97955	0.98698	0.89876
2512.91	0.97961	0.98697	0.8989
2511.5	0.97969	0.98696	0.89906
2510.08	0.97979	0.98696	0.8991
2508.67	0.97986	0.98697	0.89901
2507.25	0.97989	0.98702	0.89889
2505.83	0.97986	0.98705	0.89883
2504.42	0.97976	0.98703	0.89883
2503	0.97965	0.98699	0.89887
2501.58	0.97962	0.98699	0.89894
2500.17	0.97965	0.98706	0.89902
2498.75	0.97965	0.98714	0.89904
2497.33	0.97958	0.98714	0.89896
2495.92	0.97948	0.98708	0.89877
2494.5	0.97941	0.987	0.89853
2493.08	0.97943	0.98697	0.8983
2491.67	0.97954	0.98699	0.89818
2490.25	0.9797	0.98707	0.89825
2488.83	0.9798	0.98714	0.89849
2487.42	0.97982	0.98714	0.89878
2486	0.97983	0.98709	0.89894
2484.58	0.97989	0.98703	0.89892
2483.17	0.97993	0.98694	0.89885
2481.75	0.97991	0.98684	0.89888
2480.33	0.97986	0.98679	0.89897
2478.92	0.97984	0.98682	0.89894
2477.5	0.97987	0.98692	0.89875
2476.09	0.97992	0.98701	0.89857
2474.67	0.97997	0.98707	0.8986
2473.25	0.97995	0.98711	0.89883
2471.84	0.97981	0.98714	0.89908
2470.42	0.97963	0.98712	0.89922
2469	0.97955	0.98706	0.89926
2467.59	0.97963	0.98698	0.89925
2466.17	0.97974	0.98693	0.89926
2464.75	0.97978	0.98691	0.89929
2463.34	0.97974	0.98689	0.89928
2461.92	0.97974	0.98684	0.89919
2460.5	0.97983	0.98677	0.89906
2459.09	0.97998	0.98675	0.89901
2457.67	0.98006	0.98679	0.89907
2456.25	0.98004	0.98684	0.89912
2454.84	0.97997	0.98689	0.8991
2453.42	0.9799	0.98695	0.89913
2452	0.97984	0.98705	0.89924
2450.59	0.97974	0.98713	0.89934
2449.17	0.97963	0.98712	0.89931
2447.75	0.9796	0.98701	0.89921
2446.34	0.97968	0.98688	0.89915
2444.92	0.97981	0.98679	0.89916
2443.51	0.97991	0.98677	0.89921
2442.09	0.97995	0.9868	0.89928
2440.67	0.97996	0.98688	0.89935
2439.26	0.97996	0.98698	0.89937
2437.84	0.98	0.98701	0.89937
2436.42	0.98006	0.98695	0.89939
2435.01	0.98008	0.98688	0.89947
2433.59	0.98001	0.98688	0.89955
2432.17	0.97988	0.98692	0.89954
2430.76	0.97975	0.98691	0.89942
2429.34	0.97967	0.98687	0.89928
2427.92	0.97967	0.98687	0.89919
2426.51	0.97975	0.98696	0.89916
2425.09	0.97987	0.98708	0.89915
2423.67	0.97999	0.98717	0.89915
2422.26	0.98006	0.98722	0.89916
2420.84	0.98008	0.98725	0.89921
2419.42	0.98006	0.98723	0.89927
2418.01	0.98005	0.98713	0.8993
2416.59	0.98009	0.98699	0.89931
2415.17	0.98014	0.98691	0.89937
2413.76	0.98013	0.98692	0.8995
2412.34	0.98004	0.98697	0.89965
2410.93	0.97991	0.98698	0.89978
2409.51	0.97984	0.98696	0.89985
2408.09	0.97984	0.98691	0.89981
2406.68	0.97984	0.98678	0.89966
2405.26	0.97978	0.98661	0.89957
2403.84	0.97968	0.9865	0.89964
2402.43	0.97956	0.98654	0.8998
2401.01	0.97947	0.98666	0.89989
2399.59	0.97944	0.98674	0.89988
2398.18	0.97948	0.98678	0.89983
2396.76	0.9796	0.98679	0.89978
2395.34	0.97977	0.98678	0.89979
2393.93	0.97992	0.9868	0.89987
2392.51	0.97999	0.98685	0.89999
2391.09	0.97994	0.98696	0.90008
2389.68	0.97978	0.98714	0.9001
2388.26	0.97959	0.98739	0.90007
2386.84	0.97942	0.98768	0.90005
2385.43	0.97927	0.98796	0.90008
2384.01	0.97916	0.98816	0.90018
2382.59	0.97911	0.98817	0.90028
2381.18	0.97919	0.98799	0.90032
2379.76	0.97938	0.98767	0.90026
2378.35	0.97964	0.98728	0.90018
2376.93	0.97994	0.98686	0.90017
2375.51	0.98022	0.98646	0.90023
2374.1	0.98031	0.98622	0.90028
2372.68	0.98007	0.98621	0.90025
2371.26	0.97962	0.9863	0.90017
2369.85	0.97927	0.98628	0.90015
2368.43	0.97925	0.9861	0.90029
2367.01	0.97955	0.9859	0.90053
2365.6	0.98001	0.98573	0.9007
2364.18	0.98035	0.98567	0.90062
2362.76	0.98036	0.98583	0.90038
2361.35	0.98007	0.98612	0.90012
2359.93	0.97985	0.98603	0.8998
2358.51	0.98006	0.98501	0.89931
2357.1	0.98068	0.98318	0.89875
2355.68	0.98119	0.98175	0.89849
2354.26	0.98085	0.98242	0.89887
2352.85	0.97924	0.98604	0.89988
2351.43	0.97695	0.99138	0.90112
2350.01	0.97538	0.99547	0.90199
2348.6	0.97567	0.99571	0.90202
2347.18	0.97771	0.99205	0.90127
2345.76	0.98021	0.98699	0.90025
2344.35	0.98171	0.9835	0.89954
2342.93	0.98175	0.98277	0.89938
2341.52	0.98093	0.98391	0.89962
2340.1	0.98002	0.98551	0.90006
2338.68	0.97941	0.98669	0.90053
2337.27	0.97918	0.98724	0.90079
2335.85	0.97919	0.98719	0.9007
2334.43	0.9793	0.98677	0.9003
2333.02	0.97939	0.98631	0.89989
2331.6	0.97948	0.98602	0.8997
2330.18	0.9796	0.98603	0.89976
2328.77	0.97975	0.98631	0.89993
2327.35	0.97986	0.98665	0.90007
2325.93	0.97991	0.98683	0.90014
2324.52	0.97999	0.9867	0.90016
2323.1	0.98019	0.98636	0.90014
2321.68	0.98044	0.98607	0.90012
2320.27	0.98052	0.98612	0.90016
2318.85	0.98033	0.98648	0.90031
2317.43	0.97998	0.98686	0.90051
2316.02	0.97967	0.987	0.90062
2314.6	0.97953	0.98679	0.90057
2313.18	0.97955	0.98641	0.90042
2311.77	0.97964	0.98609	0.90025
2310.35	0.97974	0.98594	0.90014
2308.94	0.9798	0.98594	0.90012
2307.52	0.9798	0.98602	0.9002
2306.1	0.97979	0.98613	0.90035
2304.69	0.97982	0.98622	0.90046
2303.27	0.97993	0.98626	0.90051
2301.85	0.98007	0.9862	0.90055
2300.44	0.98019	0.98607	0.90067
2299.02	0.98021	0.98589	0.90084
2297.6	0.98018	0.98572	0.90098
2296.19	0.98013	0.98556	0.90099
2294.77	0.98015	0.98545	0.90089
2293.35	0.98022	0.98542	0.90072
2291.94	0.98031	0.98549	0.90057
2290.52	0.98033	0.98564	0.90047
2289.1	0.98025	0.9858	0.90044
2287.69	0.98009	0.9859	0.90046
2286.27	0.97993	0.98594	0.90055
2284.85	0.9798	0.98598	0.90065
2283.44	0.97974	0.98604	0.90071
2282.02	0.97975	0.98607	0.90068
2280.6	0.97985	0.986	0.90059
2279.19	0.98003	0.98585	0.90051
2277.77	0.98021	0.9857	0.90044
2276.36	0.98033	0.98562	0.90036
2274.94	0.98038	0.98559	0.90029
2273.52	0.98041	0.98558	0.90031
2272.11	0.98047	0.98559	0.90045
2270.69	0.98052	0.98564	0.90066
2269.27	0.98048	0.98573	0.90083
2267.86	0.98036	0.98581	0.90093
2266.44	0.98019	0.9858	0.90095
2265.02	0.98003	0.98569	0.90088
2263.61	0.97992	0.98554	0.90075
2262.19	0.9799	0.98545	0.90063
2260.77	0.97994	0.98546	0.90059
2259.36	0.98	0.98554	0.90063
2257.94	0.98005	0.98562	0.90068
2256.52	0.98012	0.98565	0.90069
2255.11	0.98022	0.98566	0.90068
2253.69	0.98033	0.98564	0.90064
2252.27	0.98037	0.98559	0.90062
2250.86	0.98032	0.98553	0.90064
2249.44	0.9802	0.98553	0.90069
2248.02	0.98003	0.98562	0.9008
2246.61	0.97992	0.9857	0.90091
2245.19	0.97995	0.98573	0.90094
2243.78	0.98006	0.9857	0.90089
2242.36	0.98019	0.9856	0.90082
2240.94	0.98031	0.98541	0.9008
2239.53	0.98042	0.98524	0.90081
2238.11	0.98052	0.98522	0.90081
2236.69	0.98055	0.98538	0.90085
2235.28	0.9805	0.98556	0.90096
2233.86	0.98038	0.98562	0.90107
2232.44	0.98024	0.98558	0.90104
2231.03	0.98004	0.98554	0.90086
2229.61	0.97979	0.9855	0.90067
2228.19	0.97961	0.9855	0.90058
2226.78	0.97969	0.98558	0.9006
2225.36	0.97999	0.98569	0.90069
2223.94	0.98028	0.98572	0.90084
2222.53	0.98034	0.98565	0.90106
2221.11	0.9802	0.98561	0.9013
2219.69	0.98001	0.98564	0.90149
2218.28	0.97993	0.98563	0.90159
2216.86	0.97996	0.98554	0.9016
2215.44	0.98004	0.9854	0.90155
2214.03	0.98013	0.98528	0.9015
2212.61	0.98025	0.98522	0.9015
2211.2	0.9804	0.98525	0.90153
2209.78	0.98048	0.98532	0.90152
2208.36	0.98044	0.98534	0.9015
2206.95	0.98034	0.98528	0.9015
2205.53	0.98027	0.9852	0.90155
2204.11	0.98026	0.98516	0.90159
2202.7	0.98025	0.98519	0.90157
2201.28	0.98021	0.9853	0.90148
2199.86	0.98016	0.98548	0.90143
2198.45	0.98011	0.98567	0.90146
2197.03	0.98006	0.98574	0.90158
2195.61	0.98003	0.98572	0.90169
2194.2	0.98	0.98567	0.90171
2192.78	0.98	0.98558	0.90166
2191.36	0.98007	0.98538	0.90164
2189.95	0.98022	0.9851	0.90174
2188.53	0.98035	0.98488	0.90193
2187.11	0.98038	0.98477	0.90205
2185.7	0.98029	0.98478	0.90199
2184.28	0.98019	0.98489	0.9018
2182.86	0.98014	0.98501	0.90165
2181.45	0.9802	0.98506	0.9016
2180.03	0.98034	0.98499	0.90157
2178.62	0.98048	0.98487	0.9015
2177.2	0.98052	0.9848	0.90144
2175.78	0.98041	0.98489	0.90143
2174.37	0.98026	0.98508	0.90147
2172.95	0.98018	0.98528	0.90151
2171.53	0.9802	0.98535	0.90153
2170.12	0.9803	0.98528	0.90152
2168.7	0.98042	0.98514	0.90155
2167.28	0.98049	0.98506	0.90163
2165.87	0.98044	0.98505	0.90172
2164.45	0.98035	0.98509	0.90173
2163.03	0.98029	0.98515	0.90163
2161.62	0.98025	0.9852	0.90154
2160.2	0.98018	0.98517	0.90155
2158.78	0.98012	0.98503	0.90162
2157.37	0.98016	0.98487	0.90168
2155.95	0.98032	0.9848	0.90168
2154.53	0.98051	0.98486	0.90163
2153.12	0.98059	0.98495	0.90157
2151.7	0.98053	0.98503	0.90158
2150.28	0.98039	0.98511	0.90166
2148.87	0.98025	0.98519	0.90169
2147.45	0.98013	0.9852	0.90161
2146.03	0.98004	0.98514	0.90152
2144.62	0.97996	0.98509	0.90147
2143.2	0.97988	0.98507	0.90143
2141.79	0.97983	0.98501	0.90142
2140.37	0.97988	0.98491	0.90145
2138.95	0.98002	0.98484	0.90157
2137.54	0.98017	0.98489	0.90172
2136.12	0.98024	0.98501	0.90187
2134.7	0.98022	0.98512	0.90198
2133.29	0.98014	0.98515	0.90199
2131.87	0.98002	0.98509	0.90188
2130.45	0.97987	0.98498	0.90175
2129.04	0.97978	0.9849	0.90169
2127.62	0.97983	0.98487	0.90168
2126.2	0.98002	0.98487	0.90162
2124.79	0.98021	0.98484	0.90153
2123.37	0.98026	0.98473	0.90156
2121.95	0.98016	0.9846	0.90179
2120.54	0.98006	0.98456	0.9021
2119.12	0.98007	0.98461	0.90229
2117.7	0.98014	0.9847	0.90228
2116.29	0.98015	0.98476	0.90214
2114.87	0.98014	0.98475	0.902
2113.45	0.98019	0.98467	0.90194
2112.04	0.98032	0.98454	0.90198
2110.62	0.98042	0.98446	0.90205
2109.21	0.98044	0.98449	0.9021
2107.79	0.98039	0.98461	0.90218
2106.37	0.98029	0.98475	0.9023
2104.96	0.98019	0.98483	0.90243
2103.54	0.98013	0.9848	0.90249
2102.12	0.98013	0.98466	0.90248
2100.71	0.98021	0.98449	0.90247
2099.29	0.98037	0.98441	0.90249
2097.87	0.98058	0.98441	0.90253
2096.46	0.98076	0.98442	0.90252
2095.04	0.98082	0.98444	0.90243
2093.62	0.98072	0.98442	0.90228
2092.21	0.98053	0.98435	0.90215
2090.79	0.9804	0.98427	0.90212
2089.37	0.98037	0.98429	0.90217
2087.96	0.98039	0.9844	0.90228
2086.54	0.98039	0.98447	0.9024
2085.12	0.98034	0.9844	0.90255
2083.71	0.9803	0.98424	0.90271
2082.29	0.98033	0.98406	0.90283
2080.87	0.9804	0.98392	0.90288
2079.46	0.9804	0.98386	0.90284
2078.04	0.98035	0.98391	0.90276
2076.63	0.98033	0.98404	0.90267
2075.21	0.98039	0.9842	0.90253
2073.79	0.98043	0.98429	0.90233
2072.38	0.98035	0.98427	0.90215
2070.96	0.98021	0.98421	0.90208
2069.54	0.9801	0.98421	0.90215
2068.13	0.98008	0.98423	0.90231
2066.71	0.98014	0.9842	0.90249
2065.29	0.98026	0.98416	0.90259
2063.88	0.98041	0.98423	0.90259
2062.46	0.98051	0.98434	0.90258
2061.04	0.9805	0.98433	0.90266
2059.63	0.9804	0.98419	0.90276
2058.21	0.98026	0.98402	0.90279
2056.79	0.98019	0.98392	0.90276
2055.38	0.98024	0.98396	0.90279
2053.96	0.98043	0.98411	0.90289
2052.54	0.98063	0.98429	0.90305
2051.13	0.98072	0.9844	0.90315
2049.71	0.98068	0.98435	0.90317
2048.29	0.98061	0.98419	0.90317
2046.88	0.98058	0.98401	0.90322
2045.46	0.98056	0.9839	0.90328
2044.05	0.9805	0.98382	0.90334
2042.63	0.98043	0.98376	0.90341
2041.21	0.9804	0.98381	0.90346
2039.8	0.98042	0.98397	0.90346
2038.38	0.98045	0.98408	0.90347
2036.96	0.98046	0.98401	0.90351
2035.55	0.98045	0.98385	0.90349
2034.13	0.98045	0.98372	0.90339
2032.71	0.98047	0.98367	0.90328
2031.3	0.98048	0.98367	0.90326
2029.88	0.98046	0.98371	0.90332
2028.46	0.9804	0.98381	0.9034
2027.05	0.98033	0.98394	0.90349
2025.63	0.98029	0.98402	0.90361
2024.21	0.98032	0.98401	0.90371
2022.8	0.98039	0.98396	0.9037
2021.38	0.98045	0.98391	0.90356
2019.96	0.98047	0.98377	0.9035
2018.55	0.98047	0.98356	0.90362
2017.13	0.9805	0.9835	0.90376
2015.71	0.98055	0.98371	0.90368
2014.3	0.98059	0.98395	0.90348
2012.88	0.98059	0.98397	0.90337
2011.47	0.98056	0.98386	0.90342
2010.05	0.98051	0.98378	0.90356
2008.63	0.98043	0.98369	0.90371
2007.22	0.98034	0.98355	0.90381
2005.8	0.98031	0.9834	0.90381
2004.38	0.98039	0.9833	0.90381
2002.97	0.98056	0.98324	0.90389
2001.55	0.98071	0.98317	0.90406
2000.13	0.98078	0.98316	0.90421
1998.72	0.98079	0.9833	0.90421
1997.3	0.98076	0.98357	0.90398
1995.88	0.9807	0.98376	0.9037
1994.47	0.98061	0.98358	0.90377
1993.05	0.98051	0.98316	0.90417
1991.63	0.98041	0.98295	0.90447
1990.22	0.9803	0.98307	0.90445
1988.8	0.98021	0.98328	0.90439
1987.38	0.98016	0.98345	0.90444
1985.97	0.9802	0.98365	0.90446
1984.55	0.98035	0.98375	0.90441
1983.13	0.98057	0.98362	0.90441
1981.72	0.98079	0.98338	0.90446
1980.3	0.98097	0.98321	0.9045
1978.89	0.98108	0.98319	0.90451
1977.47	0.9811	0.98325	0.9045
1976.05	0.98106	0.98332	0.90452
1974.64	0.98098	0.98334	0.90459
1973.22	0.98091	0.98336	0.9046
1971.8	0.98085	0.9834	0.9045
1970.39	0.98079	0.98334	0.90442
1968.97	0.98071	0.98306	0.90459
1967.55	0.98063	0.98282	0.90487
1966.14	0.98063	0.98295	0.90494
1964.72	0.9807	0.98328	0.9048
1963.3	0.98078	0.98337	0.90475
1961.89	0.9808	0.98318	0.90483
1960.47	0.98075	0.98307	0.90487
1959.05	0.98069	0.98318	0.90487
1957.64	0.98063	0.98333	0.90496
1956.22	0.98057	0.98339	0.90518
1954.8	0.98049	0.9834	0.90537
1953.39	0.98036	0.98348	0.90534
1951.97	0.98023	0.98362	0.90512
1950.55	0.98018	0.98373	0.90488
1949.14	0.98028	0.98374	0.90472
1947.72	0.98054	0.9837	0.90457
1946.3	0.98085	0.9836	0.90448
1944.89	0.98106	0.98324	0.90472
1943.47	0.98103	0.98277	0.90523
1942.06	0.98078	0.98275	0.90545
1940.64	0.98048	0.98327	0.90516
1939.22	0.98034	0.98371	0.90489
1937.81	0.98044	0.98369	0.90497
1936.39	0.98069	0.98343	0.9052
1934.97	0.98091	0.98323	0.90533
1933.56	0.98096	0.98315	0.90538
1932.14	0.98087	0.98317	0.90538
1930.72	0.98075	0.98327	0.90534
1929.31	0.9807	0.98342	0.90525
1927.89	0.98073	0.9836	0.90513
1926.47	0.98081	0.98361	0.9052
1925.06	0.98092	0.98328	0.90559
1923.64	0.98105	0.98296	0.90589
1922.22	0.98118	0.98311	0.90562
1920.81	0.98127	0.98334	0.90516
1919.39	0.98127	0.98299	0.90521
1917.97	0.98118	0.9825	0.90545
1916.56	0.98101	0.98268	0.90524
1915.14	0.98078	0.98327	0.90486
1913.72	0.98053	0.98352	0.90493
1912.31	0.98034	0.98329	0.90548
1910.89	0.98029	0.98293	0.90603
1909.48	0.98035	0.98281	0.90618
1908.06	0.98043	0.98302	0.90591
1906.64	0.98049	0.98332	0.90558
1905.23	0.98055	0.9834	0.90555
1903.81	0.98064	0.98326	0.90579
1902.39	0.98073	0.98311	0.90605
1900.98	0.98083	0.9831	0.90617
1899.56	0.98093	0.98315	0.90621
1898.14	0.98103	0.98303	0.90634
1896.73	0.98113	0.98269	0.90653
1895.31	0.98119	0.9825	0.90648
1893.89	0.98123	0.9827	0.90611
1892.48	0.98119	0.98281	0.90597
1891.06	0.98105	0.98243	0.90644
1889.64	0.98083	0.98204	0.90698
1888.23	0.98064	0.98221	0.9069
1886.81	0.98059	0.98265	0.90645
1885.39	0.98068	0.98278	0.90624
1883.98	0.98082	0.98261	0.90637
1882.56	0.98089	0.98246	0.90658
1881.14	0.98087	0.98242	0.90677
1879.73	0.98085	0.98243	0.90692
1878.31	0.98092	0.98246	0.90705
1876.9	0.98108	0.98256	0.90707
1875.48	0.98128	0.98279	0.90688
1874.06	0.98147	0.98311	0.90649
1872.65	0.98156	0.98314	0.90626
1871.23	0.9815	0.9825	0.90664
1869.81	0.98126	0.98156	0.90746
1868.4	0.98095	0.98131	0.90789
1866.98	0.98074	0.98208	0.90751
1865.56	0.98071	0.98303	0.90694
1864.15	0.98082	0.98338	0.9068
1862.73	0.98092	0.98318	0.90706
1861.31	0.98093	0.98288	0.90736
1859.9	0.98088	0.98273	0.90748
1858.48	0.98084	0.98268	0.9074
1857.06	0.98087	0.98263	0.90724
1855.65	0.98096	0.98255	0.90711
1854.23	0.98105	0.98251	0.90713
1852.81	0.98107	0.98256	0.90723
1851.4	0.98102	0.98267	0.90728
1849.98	0.98094	0.9828	0.90712
1848.56	0.98092	0.98288	0.90684
1847.15	0.98099	0.98256	0.90694
1845.73	0.98108	0.98168	0.90773
1844.32	0.98113	0.98105	0.90847
1842.9	0.98107	0.98156	0.90821
1841.48	0.98096	0.98263	0.90739
1840.07	0.98088	0.98307	0.90716
1838.65	0.98085	0.98277	0.9077
1837.23	0.98085	0.98253	0.90825
1835.82	0.98085	0.98283	0.90823
1834.4	0.98085	0.98332	0.90781
1832.98	0.98082	0.98318	0.90776
1831.57	0.98076	0.98221	0.90834
1830.15	0.98072	0.98141	0.9088
1828.73	0.98074	0.98158	0.90849
1827.32	0.98079	0.98202	0.90805
1825.9	0.98084	0.98186	0.90819
1824.48	0.98088	0.98155	0.90852
1823.07	0.98095	0.98173	0.9085
1821.65	0.98108	0.98203	0.90846
1820.23	0.9812	0.98196	0.90878
1818.82	0.98126	0.98164	0.90923
1817.4	0.98128	0.98154	0.90934
1815.98	0.98129	0.98178	0.90906
1814.57	0.98128	0.98199	0.90885
1813.15	0.98126	0.98178	0.9091
1811.74	0.98122	0.98137	0.90961
1810.32	0.98122	0.98124	0.90982
1808.9	0.98122	0.98154	0.90956
1807.49	0.98121	0.98194	0.90911
1806.07	0.98112	0.98214	0.90883
1804.65	0.98102	0.98203	0.90889
1803.24	0.98098	0.98159	0.90933
1801.82	0.9811	0.98108	0.90989
1800.4	0.98131	0.98106	0.91002
1798.99	0.98147	0.98172	0.9095
1797.57	0.98146	0.98253	0.90876
1796.15	0.98134	0.98265	0.90856
1794.74	0.9812	0.98161	0.90942
1793.32	0.98111	0.98002	0.91086
1791.9	0.9811	0.97942	0.91157
1790.49	0.98118	0.98046	0.9109
1789.07	0.98137	0.98184	0.90997
1787.65	0.98159	0.98217	0.90997
1786.24	0.98172	0.9816	0.9107
1784.82	0.9817	0.98114	0.91125
1783.4	0.98159	0.9811	0.91139
1781.99	0.98151	0.98115	0.91149
1780.57	0.98152	0.98136	0.9115
1779.16	0.98161	0.98207	0.91103
1777.74	0.98169	0.98303	0.91026
1776.32	0.98173	0.98342	0.90998
1774.91	0.9817	0.98261	0.91079
1773.49	0.98165	0.98106	0.91229
1772.07	0.98163	0.98027	0.91308
1770.66	0.98167	0.98077	0.91268
1769.24	0.98176	0.98164	0.91203
1767.82	0.98188	0.98229	0.91164
1766.41	0.98205	0.98282	0.91128
1764.99	0.98225	0.98282	0.91118
1763.57	0.98244	0.98187	0.91179
1762.16	0.98251	0.98088	0.91245
1760.74	0.98247	0.98088	0.91241
1759.32	0.98241	0.9813	0.91222
1757.91	0.98239	0.98139	0.91243
1756.49	0.98242	0.98169	0.9124
1755.07	0.98248	0.98253	0.91177
1753.66	0.98254	0.98283	0.91156
1752.24	0.98257	0.98193	0.91238
1750.82	0.98258	0.98078	0.91332
1749.41	0.98266	0.98061	0.91331
1747.99	0.98296	0.98134	0.91247
1746.58	0.98355	0.98205	0.91165
1745.16	0.98438	0.98225	0.9113
1743.74	0.98528	0.98201	0.9114
1742.33	0.98605	0.98153	0.91183
1740.91	0.98659	0.98134	0.91215
1739.49	0.98693	0.98217	0.91161
1738.08	0.98719	0.98346	0.91064
1736.66	0.98753	0.98313	0.91119
1735.24	0.98794	0.98079	0.91366
1733.83	0.98834	0.97913	0.91546
1732.41	0.98868	0.97991	0.91474
1730.99	0.98896	0.98141	0.91312
1729.58	0.98915	0.98197	0.91234
1728.16	0.9892	0.98194	0.91226
1726.74	0.98903	0.98179	0.91241
1725.33	0.98866	0.98161	0.91262
1723.91	0.98813	0.98191	0.9124
1722.49	0.98757	0.98281	0.91159
1721.08	0.98705	0.98305	0.91129
1719.66	0.98649	0.9815	0.91244
1718.24	0.98573	0.97923	0.91415
1716.83	0.98473	0.97849	0.91457
1715.41	0.98374	0.97974	0.91344
1713.99	0.98299	0.98152	0.91204
1712.58	0.98252	0.98265	0.9113
1711.16	0.9822	0.98301	0.91127
1709.75	0.98197	0.98274	0.91178
1708.33	0.98177	0.98195	0.91267
1706.91	0.9816	0.98122	0.91334
1705.5	0.98147	0.98158	0.91286
1704.08	0.98148	0.98269	0.91169
1702.66	0.98162	0.9825	0.91178
1701.25	0.98173	0.98083	0.91327
1699.83	0.9817	0.98004	0.91385
1698.41	0.98157	0.98062	0.91315
1697	0.98147	0.98073	0.91297
1695.58	0.98143	0.98071	0.91291
1694.16	0.98142	0.98181	0.91155
1692.75	0.9814	0.98298	0.90983
1691.33	0.98137	0.98302	0.90898
1689.91	0.98131	0.98279	0.90836
1688.5	0.9812	0.98298	0.9075
1687.08	0.98099	0.98208	0.90792
1685.66	0.98067	0.97926	0.91027
1684.25	0.98033	0.97719	0.91181
1682.83	0.98021	0.97844	0.90993
1681.41	0.98041	0.98128	0.90641
1680	0.98079	0.98294	0.90413
1678.58	0.98115	0.9827	0.90384
1677.17	0.98134	0.98128	0.9047
1675.75	0.98134	0.98022	0.90512
1674.33	0.98121	0.98067	0.90399
1672.92	0.98104	0.98148	0.90246
1671.5	0.98089	0.98073	0.90235
1670.08	0.98075	0.9792	0.90285
1668.67	0.98062	0.97933	0.90168
1667.25	0.98056	0.98107	0.89905
1665.83	0.98051	0.98194	0.89742
1664.42	0.98042	0.98082	0.89783
1663	0.98029	0.97936	0.89868
1661.58	0.9802	0.97954	0.89795
1660.17	0.98022	0.9813	0.89568
1658.75	0.98034	0.98317	0.89325
1657.33	0.98049	0.98356	0.89218
1655.92	0.98059	0.98113	0.89361
1654.5	0.98052	0.97693	0.89638
1653.08	0.98026	0.9757	0.89614
1651.67	0.97992	0.97971	0.89116
1650.25	0.97958	0.98364	0.88662
1648.83	0.97927	0.98289	0.88659
1647.42	0.97902	0.97949	0.88909
1646	0.97899	0.97816	0.88987
1644.59	0.9792	0.97979	0.8881
1643.17	0.97947	0.98172	0.88607
1641.75	0.97967	0.98255	0.88497
1640.34	0.97977	0.98251	0.88463
1638.92	0.97985	0.98144	0.88536
1637.5	0.97995	0.97909	0.8875
1636.09	0.98004	0.97717	0.8894
1634.67	0.98006	0.97803	0.88863
1633.25	0.97999	0.98063	0.88595
1631.84	0.97986	0.98203	0.88408
1630.42	0.97975	0.98134	0.88402
1629	0.9797	0.98002	0.8846
1627.59	0.97976	0.97954	0.88458
1626.17	0.97989	0.97955	0.88439
1624.75	0.97997	0.97922	0.8848
1623.34	0.97989	0.97919	0.88505
1621.92	0.97968	0.98038	0.88406
1620.5	0.97952	0.9815	0.88291
1619.09	0.97948	0.98046	0.88347
1617.67	0.97956	0.97799	0.88516
1616.25	0.97969	0.97709	0.88537
1614.84	0.97987	0.97861	0.88344
1613.42	0.98003	0.98033	0.88138
1612.01	0.98011	0.98051	0.88067
1610.59	0.98011	0.97961	0.88083
1609.17	0.98008	0.97887	0.88076
1607.76	0.98012	0.97877	0.88006
1606.34	0.98028	0.97896	0.87902
1604.92	0.9805	0.979	0.87807
1603.51	0.98068	0.97887	0.87726
1602.09	0.98074	0.97887	0.87635
1600.67	0.98067	0.97914	0.87526
1599.26	0.98049	0.97941	0.87421
1597.84	0.98025	0.97941	0.87341
1596.42	0.98004	0.97915	0.87278
1595.01	0.97992	0.97891	0.87202
1593.59	0.97993	0.97886	0.87105
1592.17	0.98001	0.97892	0.87014
1590.76	0.98012	0.97894	0.86951
1589.34	0.98023	0.97894	0.86916
1587.92	0.98039	0.97896	0.86891
1586.51	0.98058	0.97895	0.86869
1585.09	0.98075	0.9789	0.8685
1583.67	0.98087	0.97895	0.86819
1582.26	0.98095	0.97932	0.86755
1580.84	0.98102	0.97977	0.86673
1579.43	0.98108	0.97936	0.86667
1578.01	0.98107	0.97763	0.86794
1576.59	0.98093	0.97629	0.86911
1575.18	0.98071	0.97758	0.86802
1573.76	0.98051	0.98021	0.86559
1572.34	0.98037	0.98082	0.86484
1570.93	0.98027	0.97882	0.86651
1569.51	0.9802	0.97699	0.86834
1568.09	0.98018	0.97725	0.86846
1566.68	0.98019	0.97862	0.86745
1565.26	0.9802	0.98005	0.8661
1563.84	0.98023	0.9814	0.86472
1562.43	0.98031	0.98124	0.86486
1561.01	0.98041	0.97786	0.86824
1559.59	0.98047	0.97371	0.8727
1558.18	0.98048	0.97415	0.87302
1556.76	0.98047	0.97831	0.86967
1555.34	0.98041	0.98113	0.8672
1553.93	0.98024	0.98128	0.86695
1552.51	0.97995	0.98026	0.86767
1551.09	0.9796	0.97934	0.86828
1549.68	0.97934	0.97926	0.86822
1548.26	0.97923	0.98004	0.86757
1546.85	0.97919	0.98069	0.86718
1545.43	0.97908	0.98046	0.86761
1544.01	0.97886	0.97936	0.86867
1542.6	0.97868	0.97723	0.87048
1541.18	0.97872	0.97464	0.87273
1539.76	0.97908	0.97444	0.87307
1538.35	0.9796	0.97781	0.87038
1536.93	0.98006	0.98105	0.86777
1535.51	0.98031	0.9808	0.86814
1534.1	0.98031	0.97849	0.87032
1532.68	0.98013	0.97782	0.87103
1531.26	0.97994	0.97926	0.86984
1529.85	0.97983	0.98031	0.86889
1528.43	0.97981	0.97979	0.86916
1527.01	0.97982	0.97895	0.86958
1525.6	0.9798	0.97887	0.86945
1524.18	0.97971	0.97875	0.86982
1522.76	0.97949	0.97801	0.87132
1521.35	0.97924	0.97799	0.87244
1519.93	0.97906	0.97921	0.87225
1518.51	0.97905	0.97997	0.87218
1517.1	0.97923	0.97955	0.87303
1515.68	0.97953	0.97938	0.87368
1514.26	0.97985	0.98016	0.87347
1512.85	0.97998	0.98122	0.87291
1511.43	0.97981	0.98166	0.87278
1510.02	0.97939	0.98029	0.87428
1508.6	0.979	0.97663	0.87813
1507.18	0.97894	0.97354	0.8819
1505.77	0.97924	0.97468	0.88188
1504.35	0.97958	0.97861	0.87894
1502.93	0.97975	0.98121	0.87683
1501.52	0.97983	0.9809	0.87724
1500.1	0.97986	0.9788	0.87939
1498.68	0.97986	0.97666	0.88183
1497.27	0.97982	0.97596	0.88325
1495.85	0.97981	0.97733	0.88292
1494.43	0.97991	0.97957	0.88167
1493.02	0.98009	0.98028	0.88154
1491.6	0.98024	0.97862	0.88335
1490.18	0.98029	0.97628	0.88573
1488.77	0.98024	0.97549	0.88678
1487.35	0.98021	0.97641	0.88641
1485.93	0.98032	0.9777	0.88577
1484.52	0.98056	0.97829	0.8857
1483.1	0.98082	0.97807	0.88623
1481.68	0.98102	0.97777	0.88673
1480.27	0.98113	0.97805	0.88668
1478.85	0.98118	0.97857	0.88641
1477.44	0.98123	0.97865	0.88642
1476.02	0.98127	0.97796	0.88693
1474.6	0.98125	0.97657	0.88789
1473.19	0.98117	0.97545	0.88853
1471.77	0.98118	0.97613	0.88761
1470.35	0.98135	0.97833	0.88541
1468.94	0.98165	0.97982	0.88395
1467.52	0.98194	0.97914	0.88448
1466.1	0.98216	0.97732	0.88602
1464.69	0.98231	0.97668	0.88633
1463.27	0.98242	0.97809	0.88454
1461.85	0.98247	0.97972	0.88238
1460.44	0.98232	0.97917	0.88216
1459.02	0.98185	0.97627	0.88421
1457.6	0.98115	0.97378	0.88613
1456.19	0.98067	0.97443	0.88542
1454.77	0.98066	0.97712	0.88298
1453.35	0.98095	0.97897	0.88136
1451.94	0.98124	0.979	0.88138
1450.52	0.98139	0.97792	0.88244
1449.1	0.98145	0.97664	0.88365
1447.69	0.98148	0.97596	0.88428
1446.27	0.98149	0.97617	0.88402
1444.86	0.98144	0.97677	0.88347
1443.44	0.98136	0.97725	0.88317
1442.02	0.98133	0.97769	0.88304
1440.61	0.98133	0.97777	0.88314
1439.19	0.98124	0.97674	0.88404
1437.77	0.98096	0.97501	0.88538
1436.36	0.98058	0.97451	0.88561
1434.94	0.98033	0.97594	0.88421
1433.52	0.98033	0.97748	0.8829
1432.11	0.98047	0.97753	0.88301
1430.69	0.98065	0.97673	0.88387
1429.27	0.98077	0.97652	0.88404
1427.86	0.98077	0.97693	0.88343
1426.44	0.98064	0.97713	0.88289
1425.02	0.98049	0.97705	0.88259
1423.61	0.98045	0.97728	0.88208
1422.19	0.98052	0.97731	0.88173
1420.77	0.98059	0.97611	0.88229
1419.36	0.98055	0.9744	0.88306
1417.94	0.98049	0.97404	0.88254
1416.52	0.9805	0.97512	0.88093
1415.11	0.98056	0.9761	0.87963
1413.69	0.98056	0.97621	0.87917
1412.28	0.98049	0.97592	0.879
1410.86	0.98041	0.97587	0.87854
1409.44	0.98043	0.97611	0.87768
1408.03	0.9805	0.97612	0.87685
1406.61	0.98052	0.97561	0.87632
1405.19	0.98049	0.97521	0.87573
1403.78	0.98054	0.97555	0.87467
1402.36	0.98071	0.97604	0.87361
1400.94	0.98087	0.97579	0.87315
1399.53	0.98083	0.97508	0.87304
1398.11	0.98064	0.9747	0.87278
1396.69	0.98048	0.97465	0.87256
1395.28	0.98047	0.97475	0.87243
1393.86	0.98061	0.97533	0.87181
1392.44	0.98082	0.97625	0.87069
1391.03	0.98107	0.97652	0.87009
1389.61	0.98138	0.97564	0.87065
1388.19	0.98168	0.9744	0.87165
1386.78	0.98191	0.97402	0.87189
1385.36	0.98198	0.9746	0.87127
1383.94	0.98188	0.97521	0.87069
1382.53	0.9817	0.9753	0.87066
1381.11	0.98154	0.97513	0.87085
1379.7	0.98141	0.97509	0.8708
1378.28	0.98128	0.97513	0.87052
1376.86	0.98109	0.97486	0.87045
1375.45	0.98084	0.9743	0.87073
1374.03	0.98063	0.97414	0.87088
1372.61	0.98056	0.97474	0.87057
1371.2	0.9806	0.97541	0.87026
1369.78	0.98068	0.97552	0.87032
1368.36	0.98069	0.97539	0.87038
1366.95	0.98062	0.97532	0.87023
1365.53	0.98047	0.97494	0.87031
1364.11	0.98032	0.97408	0.87089
1362.7	0.98025	0.97344	0.87137
1361.28	0.98029	0.97369	0.87117
1359.86	0.98042	0.97442	0.87064
1358.45	0.98056	0.97487	0.87045
1357.03	0.98066	0.97487	0.87071
1355.61	0.98071	0.97473	0.87109
1354.2	0.98074	0.97472	0.87129
1352.78	0.98075	0.97479	0.87132
1351.36	0.98075	0.97472	0.87135
1349.95	0.98075	0.97446	0.87144
1348.53	0.98081	0.97422	0.87153
1347.12	0.9809	0.97422	0.87157
1345.7	0.98098	0.97456	0.87158
1344.28	0.98098	0.97502	0.87167
1342.87	0.98088	0.97514	0.87203
1341.45	0.98077	0.97458	0.87271
1340.03	0.98077	0.97373	0.87334
1338.62	0.98094	0.97331	0.87341
1337.2	0.98123	0.97351	0.873
1335.78	0.98154	0.97389	0.87264
1334.37	0.98181	0.97406	0.87268
1332.95	0.98201	0.974	0.87303
1331.53	0.98216	0.97389	0.87349
1330.12	0.98227	0.97385	0.87387
1328.7	0.98234	0.97387	0.87412
1327.28	0.98239	0.97389	0.87424
1325.87	0.98242	0.97385	0.87428
1324.45	0.98244	0.9738	0.87429
1323.03	0.98247	0.97377	0.87437
1321.62	0.98252	0.97373	0.8746
1320.2	0.98259	0.9737	0.87491
1318.78	0.9827	0.97381	0.87514
1317.37	0.98282	0.97407	0.87523
1315.95	0.98294	0.97424	0.87536
1314.53	0.98302	0.97416	0.87566
1313.12	0.98311	0.974	0.87602
1311.7	0.98323	0.97399	0.87626
1310.29	0.98337	0.97406	0.87643
1308.87	0.98358	0.974	0.8767
1307.45	0.98385	0.97387	0.87708
1306.04	0.98418	0.9738	0.87752
1304.62	0.98456	0.97377	0.87795
1303.2	0.98497	0.97372	0.87828
1301.79	0.98535	0.97362	0.87845
1300.37	0.98568	0.97352	0.87853
1298.95	0.98593	0.97343	0.87863
1297.54	0.98618	0.97336	0.87875
1296.12	0.98645	0.97331	0.87883
1294.7	0.98677	0.97327	0.87886
1293.29	0.98713	0.97325	0.87894
1291.87	0.98753	0.97324	0.8792
1290.45	0.98794	0.97319	0.87962
1289.04	0.98828	0.97306	0.88007
1287.62	0.98851	0.97298	0.88045
1286.2	0.98864	0.97308	0.88077
1284.79	0.98872	0.97339	0.88111
1283.37	0.98877	0.97372	0.88147
1281.95	0.98886	0.97392	0.88174
1280.54	0.98903	0.97391	0.88184
1279.12	0.98923	0.97375	0.88189
1277.71	0.98938	0.9736	0.88204
1276.29	0.98942	0.97354	0.88229
1274.87	0.98936	0.97353	0.88257
1273.46	0.9892	0.97347	0.88283
1272.04	0.98898	0.9734	0.88309
1270.62	0.98875	0.9734	0.88338
1269.21	0.98856	0.9735	0.88367
1267.79	0.98842	0.97365	0.88385
1266.37	0.98831	0.97375	0.88383
1264.96	0.98819	0.97378	0.88367
1263.54	0.98801	0.97368	0.88358
1262.12	0.98776	0.97348	0.88366
1260.71	0.98747	0.9733	0.88384
1259.29	0.98721	0.97328	0.884
1257.87	0.987	0.9734	0.88414
1256.46	0.98681	0.97358	0.88435
1255.04	0.98657	0.97369	0.88467
1253.62	0.98624	0.97367	0.88507
1252.21	0.98586	0.97352	0.88545
1250.79	0.98554	0.97331	0.88566
1249.37	0.98535	0.9731	0.88564
1247.96	0.98528	0.97293	0.88554
1246.54	0.98524	0.97283	0.88554
1245.13	0.98517	0.97278	0.88565
1243.71	0.98508	0.97273	0.88571
1242.29	0.98498	0.97263	0.88566
1240.88	0.98482	0.97253	0.88564
1239.46	0.98462	0.97247	0.88578
1238.04	0.98449	0.97245	0.88604
1236.63	0.98449	0.97242	0.88627
1235.21	0.98456	0.97237	0.88637
1233.79	0.98463	0.97231	0.88631
1232.38	0.98465	0.97227	0.88621
1230.96	0.98457	0.97228	0.88617
1229.54	0.98442	0.97233	0.88622
1228.13	0.98427	0.97239	0.88627
1226.71	0.98419	0.9724	0.88627
1225.29	0.98418	0.97236	0.88626
1223.88	0.9842	0.9723	0.88631
1222.46	0.98425	0.97228	0.88637
1221.04	0.98434	0.97228	0.88636
1219.63	0.98442	0.97222	0.88627
1218.21	0.98442	0.97208	0.88625
1216.79	0.98434	0.97194	0.8864
1215.38	0.98424	0.97186	0.88668
1213.96	0.98417	0.97184	0.88691
1212.55	0.98416	0.97183	0.88698
1211.13	0.98421	0.97183	0.88701
1209.71	0.98424	0.97184	0.88715
1208.3	0.98423	0.97185	0.88743
1206.88	0.98422	0.97183	0.88774
1205.46	0.98428	0.97178	0.888
1204.05	0.98437	0.97171	0.88821
1202.63	0.98442	0.97166	0.88838
1201.21	0.98445	0.97164	0.88847
1199.8	0.98447	0.97162	0.88847
1198.38	0.9845	0.9716	0.88842
1196.96	0.98447	0.9716	0.88842
1195.55	0.98439	0.9716	0.88858
1194.13	0.9843	0.97151	0.88895
1192.71	0.98424	0.97126	0.88948
1191.3	0.98419	0.97093	0.88996
1189.88	0.98409	0.97073	0.89029
1188.46	0.98395	0.97071	0.89056
1187.05	0.98385	0.97079	0.89087
1185.63	0.9839	0.97082	0.89114
1184.21	0.9841	0.97072	0.89125
1182.8	0.98428	0.97051	0.89123
1181.38	0.98425	0.97025	0.89122
1179.97	0.98402	0.97002	0.89125
1178.55	0.98378	0.96992	0.89128
1177.13	0.98361	0.96996	0.89121
1175.72	0.98347	0.97009	0.89108
1174.3	0.98335	0.97019	0.89103
1172.88	0.98324	0.9702	0.89108
1171.47	0.98311	0.97009	0.89106
1170.05	0.98297	0.96985	0.89081
1168.63	0.9829	0.96953	0.89038
1167.22	0.98298	0.96925	0.88995
[truncated: 401 more rows]

## Sheet: MB DYE AgFe
Mb dye removal by AgFeBMNPs
W.nm	0min	10min	20min	30min	40min	50min	60min	70min	80min	90min	100min	110min	120min	130min	140min	150min	160min	170min	180min
300	3.39474	3.45932	1.44477	0.520546	0.452449	1.077	0.507823	0.474111	0.332205	0.26648	0.54559	0.230755	0.411121	0.33697	0.227296	0.295767	0.321623	0.314712	0.314712
301	1.48638	3.53632	1.23224	0.510473	0.455934	0.948897	0.486091	0.470445	0.34417	0.271166	0.487	0.232913	0.36884	0.303746	0.235426	0.274303	0.298329	0.292762	0.292762
302	0.990041	3.60637	1.11112	0.498551	0.454658	0.869024	0.465196	0.459556	0.351406	0.271962	0.445196	0.233103	0.338015	0.27743	0.23935	0.257892	0.281404	0.275894	0.275894
303	0.783536	2.20028	1.02676	0.484729	0.451424	0.800755	0.445541	0.450002	0.356178	0.271293	0.409624	0.231608	0.309246	0.255249	0.241969	0.244731	0.267358	0.262853	0.262853
304	0.653343	1.49206	0.956494	0.470053	0.445224	0.746199	0.425078	0.437489	0.358621	0.268751	0.380839	0.227083	0.287255	0.236805	0.243454	0.23273	0.255051	0.252187	0.252187
305	0.562023	1.25339	0.903342	0.455123	0.438343	0.701591	0.406154	0.423846	0.3585	0.264983	0.355271	0.222806	0.266599	0.218898	0.243614	0.223032	0.246015	0.244323	0.244323
306	0.489966	1.11678	0.855241	0.439126	0.42817	0.664406	0.388554	0.411	0.355427	0.260304	0.333404	0.216356	0.249321	0.204229	0.242228	0.215539	0.238692	0.237631	0.237631
307	0.434697	1.0258	0.817083	0.423946	0.418571	0.632133	0.371599	0.396999	0.35207	0.256721	0.314607	0.211836	0.234215	0.193818	0.241338	0.207922	0.231417	0.230737	0.230737
308	0.392597	0.959689	0.789469	0.411562	0.410122	0.605864	0.358031	0.38597	0.348025	0.251614	0.299617	0.206488	0.222474	0.184077	0.238819	0.2025	0.226638	0.226519	0.226519
309	0.359476	0.911896	0.765598	0.401691	0.403029	0.585853	0.345471	0.377991	0.34457	0.247401	0.288279	0.202867	0.213374	0.175684	0.238302	0.198444	0.22242	0.222506	0.222506
310	0.334114	0.875892	0.746915	0.39308	0.3975	0.569021	0.33657	0.369813	0.341824	0.244058	0.279253	0.199542	0.206123	0.168734	0.237591	0.194409	0.218786	0.219236	0.219236
311	0.31355	0.844935	0.733145	0.387246	0.39306	0.556614	0.328872	0.364015	0.339754	0.241869	0.27201	0.197188	0.200279	0.1638	0.23706	0.19231	0.216641	0.216683	0.216683
312	0.297775	0.822756	0.720519	0.381522	0.389537	0.546562	0.322722	0.359515	0.338221	0.239943	0.266903	0.194983	0.195383	0.159403	0.236121	0.190098	0.214473	0.214804	0.214804
313	0.285111	0.804442	0.710788	0.376564	0.385929	0.537813	0.31789	0.3554	0.336803	0.238262	0.261657	0.192996	0.19081	0.155918	0.23587	0.18752	0.212181	0.212468	0.212468
314	0.274797	0.789919	0.703633	0.373789	0.383534	0.530513	0.314826	0.352982	0.335404	0.236726	0.257574	0.191252	0.186589	0.152918	0.235334	0.185602	0.210624	0.211013	0.211013
315	0.266621	0.777583	0.697148	0.370582	0.381061	0.524701	0.311468	0.35087	0.334503	0.234972	0.254304	0.189497	0.18428	0.150553	0.23522	0.184603	0.209257	0.210156	0.210156
316	0.259125	0.766412	0.6902	0.368062	0.379533	0.518758	0.308675	0.34874	0.333289	0.233801	0.251102	0.188246	0.181559	0.148235	0.234702	0.182895	0.207558	0.208803	0.208803
317	0.252157	0.757027	0.685182	0.365763	0.378149	0.513708	0.306633	0.346358	0.333194	0.232728	0.248594	0.186968	0.179958	0.146218	0.234272	0.182124	0.206238	0.208414	0.208414
318	0.246454	0.747436	0.679389	0.36365	0.375546	0.508817	0.30402	0.344612	0.334118	0.231384	0.246165	0.185271	0.17786	0.144613	0.234161	0.180684	0.205473	0.208847	0.208847
319	0.241697	0.739053	0.673505	0.361456	0.374562	0.503695	0.301831	0.342314	0.332737	0.230086	0.2435	0.184084	0.176088	0.143026	0.232709	0.179379	0.204111	0.207583	0.207583
320	0.237068	0.731007	0.668548	0.359971	0.373447	0.499487	0.300062	0.341329	0.331228	0.229406	0.241469	0.183422	0.174963	0.141556	0.232343	0.17846	0.203433	0.206828	0.206828
321	0.233468	0.724463	0.664056	0.358049	0.372185	0.495712	0.298286	0.339262	0.330399	0.228149	0.239448	0.182185	0.173391	0.140281	0.231485	0.177745	0.202431	0.205904	0.205904
322	0.229658	0.718828	0.659855	0.356637	0.370194	0.493148	0.296853	0.337703	0.32887	0.227391	0.238245	0.181423	0.172397	0.139438	0.230708	0.177024	0.202026	0.205099	0.205099
323	0.226915	0.713802	0.656101	0.354883	0.369459	0.489782	0.295973	0.336798	0.32746	0.226168	0.236104	0.180587	0.171091	0.138266	0.229816	0.176146	0.200764	0.204094	0.204094
324	0.223502	0.707799	0.652001	0.353568	0.367785	0.486203	0.294178	0.335003	0.326308	0.225496	0.234594	0.179945	0.169994	0.137334	0.229415	0.175158	0.200109	0.203427	0.203427
325	0.220199	0.702368	0.648098	0.3519	0.365829	0.482437	0.292908	0.333698	0.32445	0.22432	0.233006	0.179202	0.168837	0.136479	0.228438	0.174159	0.199085	0.202426	0.202426
326	0.216161	0.69635	0.644456	0.349808	0.363668	0.478426	0.291568	0.331647	0.322841	0.223036	0.231097	0.178033	0.167382	0.135134	0.227392	0.173038	0.197919	0.201518	0.201518
327	0.211757	0.689714	0.639356	0.347708	0.361417	0.474051	0.288762	0.329566	0.320283	0.2217	0.228857	0.176731	0.165633	0.133568	0.225719	0.171937	0.197014	0.200331	0.200331
328	0.206313	0.681947	0.633609	0.345005	0.358848	0.468982	0.286558	0.326807	0.317218	0.219583	0.226476	0.174931	0.163647	0.13216	0.22463	0.170776	0.194796	0.199308	0.199308
329	0.199317	0.673127	0.627396	0.341393	0.355184	0.464178	0.283078	0.323462	0.314415	0.217147	0.223483	0.173024	0.161717	0.13015	0.22314	0.169856	0.193509	0.198383	0.198383
330	0.192694	0.664971	0.621893	0.337974	0.351613	0.458885	0.279631	0.319852	0.31146	0.215181	0.220164	0.171302	0.159234	0.128243	0.221671	0.168082	0.192091	0.197031	0.197031
331	0.189353	0.660228	0.618618	0.336285	0.349498	0.456457	0.278093	0.318412	0.309867	0.214041	0.218884	0.170449	0.15833	0.127448	0.220811	0.16763	0.191478	0.196764	0.196764
332	0.169529	0.636896	0.601943	0.325548	0.339724	0.440642	0.267682	0.307911	0.300503	0.207417	0.209882	0.164617	0.150881	0.118881	0.216349	0.163425	0.18699	0.1929	0.1929
333	0.15817	0.625031	0.593342	0.319353	0.333702	0.432262	0.262	0.302132	0.295498	0.203788	0.205494	0.161713	0.147351	0.115994	0.214399	0.161887	0.185434	0.191344	0.191344
334	0.147265	0.613436	0.58434	0.313285	0.327767	0.424237	0.25641	0.296804	0.290588	0.200393	0.201268	0.158372	0.143752	0.112957	0.212273	0.16049	0.184079	0.190195	0.190195
335	0.136262	0.60152	0.575515	0.307698	0.321772	0.416842	0.250696	0.291405	0.284913	0.196479	0.196899	0.154846	0.140136	0.110006	0.209421	0.158745	0.182942	0.188883	0.188883
336	0.12569	0.590693	0.568272	0.301898	0.316251	0.409365	0.245251	0.286212	0.280043	0.192825	0.19296	0.152221	0.136866	0.106819	0.207018	0.157369	0.181676	0.187965	0.187965
337	0.116818	0.581568	0.561293	0.296915	0.311256	0.403147	0.240302	0.281474	0.275906	0.189448	0.189304	0.14971	0.134327	0.104402	0.204642	0.155967	0.180697	0.186826	0.186826
338	0.109323	0.574134	0.555637	0.29265	0.307168	0.398438	0.236311	0.277365	0.271726	0.187125	0.186679	0.147593	0.132146	0.102672	0.202902	0.154878	0.179823	0.186172	0.186172
339	0.105876	0.571029	0.553355	0.290521	0.304755	0.39628	0.233936	0.275393	0.268871	0.185133	0.185324	0.145751	0.1311	0.101683	0.201316	0.153406	0.179268	0.185848	0.185848
340	0.096541	0.599221	0.558332	0.276833	0.279372	0.406399	0.225941	0.257949	0.233637	0.164805	0.187113	0.130309	0.133671	0.104242	0.176209	0.160956	0.187562	0.196644	0.196644
341	0.08853	0.588488	0.551599	0.272199	0.277515	0.397873	0.22162	0.254913	0.232298	0.16428	0.183171	0.12949	0.13052	0.101956	0.176796	0.159402	0.186008	0.194576	0.194576
342	0.081063	0.578052	0.545326	0.267878	0.275013	0.392929	0.219352	0.253193	0.231639	0.163685	0.180226	0.128644	0.128624	0.099805	0.176649	0.158148	0.18466	0.193205	0.193205
343	0.075262	0.56897	0.539401	0.266158	0.273156	0.387884	0.217008	0.251083	0.230747	0.162238	0.177764	0.127756	0.126373	0.098281	0.176659	0.157331	0.183361	0.192003	0.192003
344	0.070105	0.561489	0.535383	0.264501	0.272431	0.383335	0.215169	0.249155	0.230629	0.161419	0.175509	0.127583	0.124775	0.096798	0.177286	0.156053	0.182048	0.190321	0.190321
345	0.065704	0.554726	0.531255	0.263245	0.271785	0.379911	0.213316	0.247706	0.230305	0.161818	0.173228	0.126738	0.122802	0.095238	0.178514	0.154943	0.181097	0.189285	0.189285
346	0.061255	0.549357	0.528007	0.261499	0.270388	0.377209	0.211053	0.246498	0.230275	0.161545	0.171991	0.126495	0.121516	0.093971	0.178666	0.15442	0.180245	0.188357	0.188357
347	0.058045	0.545026	0.525232	0.261034	0.269746	0.374588	0.210323	0.246443	0.230537	0.161003	0.170833	0.126442	0.120686	0.093104	0.178956	0.153253	0.179029	0.187599	0.187599
348	0.054585	0.540408	0.522101	0.259262	0.268774	0.37228	0.208858	0.245174	0.230583	0.161202	0.171187	0.126553	0.120126	0.092245	0.179832	0.153046	0.178584	0.187027	0.187027
349	0.051305	0.535893	0.519916	0.258233	0.26769	0.369934	0.206819	0.244057	0.230878	0.161687	0.170118	0.127077	0.120381	0.091629	0.180465	0.15262	0.178228	0.186149	0.186149
350	0.048671	0.532952	0.518164	0.257157	0.266537	0.367524	0.20541	0.243375	0.231018	0.161962	0.169055	0.127461	0.1194	0.090461	0.180876	0.15204	0.178119	0.185187	0.185187
351	0.046006	0.53018	0.516081	0.256441	0.266216	0.366245	0.204584	0.242578	0.232161	0.163057	0.168855	0.127584	0.118949	0.089765	0.182068	0.151959	0.17796	0.18489	0.18489
352	0.044004	0.528122	0.515309	0.255791	0.265953	0.365206	0.203851	0.241957	0.233527	0.164869	0.167754	0.129522	0.118138	0.089229	0.18432	0.15209	0.17741	0.184563	0.184563
353	0.042119	0.526023	0.513634	0.255395	0.266181	0.364388	0.203412	0.241256	0.23278	0.164407	0.167468	0.12883	0.11798	0.089647	0.183872	0.15205	0.177207	0.184748	0.184748
354	0.040932	0.523565	0.513325	0.254727	0.266019	0.363401	0.202689	0.240919	0.232564	0.163767	0.166611	0.128947	0.117108	0.088539	0.184072	0.151688	0.177168	0.184019	0.184019
355	0.038947	0.521653	0.513129	0.254684	0.265962	0.362886	0.202204	0.24072	0.232083	0.163704	0.166365	0.128388	0.116964	0.088565	0.184309	0.151857	0.17735	0.183969	0.183969
356	0.037138	0.520269	0.512448	0.254154	0.265595	0.361595	0.201832	0.240914	0.23255	0.163438	0.165933	0.128608	0.116678	0.088108	0.184515	0.151883	0.177158	0.183811	0.183811
357	0.035596	0.519458	0.511674	0.254052	0.265423	0.361271	0.201919	0.241017	0.232337	0.163698	0.165598	0.128414	0.116698	0.087751	0.184361	0.152158	0.177241	0.184521	0.184521
358	0.033871	0.518748	0.511819	0.253704	0.264676	0.360926	0.201353	0.240214	0.231923	0.163649	0.165462	0.128453	0.116523	0.087688	0.184341	0.152333	0.177591	0.184245	0.184245
359	0.032684	0.517577	0.512127	0.254099	0.264557	0.360403	0.201367	0.240197	0.232421	0.163941	0.165411	0.128748	0.116234	0.087459	0.185118	0.152204	0.177921	0.184161	0.184161
360	0.032478	0.517792	0.511611	0.2548	0.265419	0.36029	0.202064	0.240709	0.232399	0.163672	0.165186	0.127799	0.11613	0.087196	0.185353	0.152609	0.178021	0.184425	0.184425
361	0.031623	0.518232	0.511571	0.255062	0.265537	0.360004	0.202215	0.23922	0.232302	0.164125	0.164711	0.127764	0.116052	0.087128	0.185895	0.152647	0.177824	0.184554	0.184554
362	0.03042	0.51884	0.512129	0.254777	0.265741	0.361018	0.202028	0.23902	0.23158	0.16373	0.164806	0.12727	0.115929	0.0873	0.185763	0.152703	0.178033	0.185055	0.185055
363	0.029876	0.51883	0.512896	0.255301	0.2661	0.362706	0.202379	0.239119	0.230641	0.16423	0.165213	0.127209	0.116169	0.086986	0.185722	0.152861	0.178234	0.185388	0.185388
364	0.029436	0.520182	0.514219	0.256016	0.266379	0.363253	0.202611	0.239117	0.229147	0.164658	0.165338	0.127311	0.116452	0.0871	0.185819	0.153208	0.178848	0.185482	0.185482
365	0.028717	0.521128	0.514673	0.255945	0.266331	0.363887	0.201906	0.2393	0.22855	0.164801	0.165619	0.127585	0.116694	0.087187	0.185356	0.153579	0.17942	0.185863	0.185863
366	0.028487	0.522558	0.515508	0.256364	0.26691	0.36473	0.202429	0.239373	0.228096	0.164979	0.165856	0.127169	0.116805	0.08732	0.185379	0.154255	0.180423	0.186405	0.186405
367	0.028591	0.524119	0.516678	0.256824	0.267321	0.366376	0.202973	0.239251	0.227792	0.164258	0.166384	0.126834	0.117205	0.087953	0.185089	0.154626	0.182317	0.187014	0.187014
368	0.028311	0.526216	0.518239	0.256973	0.267233	0.367708	0.203055	0.239656	0.225905	0.162858	0.166901	0.125722	0.117764	0.088078	0.183171	0.155093	0.181959	0.187154	0.187154
369	0.028163	0.528453	0.519131	0.257315	0.267115	0.368953	0.203113	0.239822	0.223066	0.161026	0.167718	0.123256	0.118237	0.088606	0.179373	0.155481	0.181633	0.187791	0.187791
370	0.028545	0.529484	0.520059	0.25744	0.267322	0.369051	0.20336	0.240312	0.222203	0.160606	0.167901	0.122279	0.118307	0.088531	0.180285	0.155771	0.18184	0.188107	0.188107
371	0.025073	0.50974	0.511308	0.257506	0.26886	0.359071	0.200093	0.242792	0.237479	0.167024	0.162891	0.12961	0.113811	0.0864	0.190454	0.15156	0.174975	0.181253	0.181253
372	0.02507	0.509692	0.511458	0.257922	0.269644	0.358972	0.20027	0.242286	0.239065	0.168144	0.162361	0.130694	0.113558	0.086217	0.192157	0.151313	0.17503	0.181044	0.181044
373	0.025089	0.509855	0.511428	0.258275	0.270525	0.358876	0.200466	0.242614	0.241297	0.169791	0.161629	0.13193	0.113352	0.085958	0.194827	0.150363	0.174977	0.180729	0.180729
374	0.025263	0.509464	0.512216	0.25902	0.271044	0.35894	0.200941	0.243167	0.24254	0.170802	0.161633	0.132729	0.113226	0.086061	0.196676	0.150203	0.175029	0.180519	0.180519
375	0.025211	0.509885	0.512581	0.259633	0.271519	0.359071	0.201389	0.243393	0.243552	0.171282	0.161689	0.133139	0.113407	0.085922	0.197277	0.15057	0.175296	0.180301	0.180301
376	0.025442	0.509997	0.512914	0.260453	0.272419	0.358834	0.201845	0.244226	0.24459	0.172325	0.161902	0.133971	0.113099	0.085693	0.19853	0.150183	0.174817	0.180315	0.180315
377	0.025414	0.509618	0.512874	0.260691	0.273046	0.35889	0.201847	0.244611	0.245839	0.17295	0.161901	0.134417	0.113149	0.085597	0.198992	0.150254	0.17464	0.18021	0.18021
378	0.025767	0.509566	0.512777	0.261319	0.273743	0.358802	0.202186	0.245297	0.246923	0.173891	0.161734	0.134842	0.112844	0.08526	0.199496	0.150333	0.174418	0.179905	0.179905
379	0.025872	0.509509	0.513092	0.261716	0.274381	0.358448	0.202355	0.246376	0.24779	0.17433	0.161391	0.134908	0.112465	0.084923	0.19988	0.15054	0.174062	0.179529	0.179529
380	0.026213	0.50924	0.51321	0.262031	0.274652	0.358607	0.202765	0.246873	0.248255	0.174834	0.161534	0.134791	0.112493	0.084843	0.200278	0.150824	0.173973	0.179624	0.179624
381	0.026209	0.509008	0.513228	0.262077	0.275033	0.359013	0.202642	0.247078	0.24881	0.175016	0.161766	0.134118	0.112496	0.084947	0.200621	0.15083	0.173911	0.179747	0.179747
382	0.026678	0.508631	0.512993	0.262725	0.275693	0.3587	0.203279	0.247719	0.249498	0.175378	0.161311	0.134163	0.112347	0.084613	0.20066	0.150651	0.173558	0.179261	0.179261
383	0.026895	0.508527	0.513196	0.262999	0.276001	0.358176	0.203429	0.24783	0.250434	0.175539	0.161742	0.134463	0.112426	0.084486	0.200891	0.150496	0.173614	0.179235	0.179235
384	0.027358	0.50857	0.513487	0.263379	0.276466	0.358218	0.203435	0.247829	0.250799	0.175755	0.161484	0.134611	0.112095	0.084237	0.201129	0.150243	0.173406	0.178738	0.178738
385	0.027593	0.508552	0.513437	0.263711	0.276827	0.35802	0.203675	0.247297	0.251373	0.176207	0.161372	0.134823	0.111992	0.084305	0.201365	0.150198	0.173255	0.178625	0.178625
386	0.028384	0.508273	0.513709	0.265597	0.278978	0.358229	0.203858	0.248518	0.252576	0.177121	0.161131	0.135205	0.111813	0.084051	0.20197	0.149843	0.173051	0.178451	0.178451
387	0.028699	0.507426	0.513701	0.265746	0.279518	0.358469	0.204356	0.248429	0.253133	0.176951	0.161217	0.13551	0.111905	0.084051	0.202193	0.149902	0.173057	0.178198	0.178198
388	0.029141	0.507517	0.514052	0.266067	0.279616	0.358395	0.204728	0.248141	0.253632	0.177269	0.161142	0.135718	0.111534	0.083829	0.202724	0.149578	0.172724	0.177954	0.177954
389	0.029512	0.507555	0.514354	0.266681	0.279952	0.358289	0.205043	0.24856	0.254173	0.177603	0.16098	0.135784	0.111414	0.083781	0.202765	0.149138	0.172693	0.177672	0.177672
390	0.029692	0.506792	0.514423	0.266594	0.280319	0.358417	0.205085	0.248662	0.254822	0.178251	0.160764	0.13606	0.111302	0.083568	0.203074	0.149151	0.172236	0.177696	0.177696
391	0.029999	0.506782	0.514193	0.266706	0.280358	0.3583	0.205233	0.248662	0.255088	0.178358	0.160332	0.135947	0.11086	0.082858	0.203124	0.148541	0.171931	0.177153	0.177153
392	0.030396	0.506081	0.513709	0.267111	0.280443	0.35813	0.205285	0.248776	0.255454	0.178314	0.159899	0.136026	0.110599	0.082906	0.203126	0.148228	0.171705	0.17664	0.17664
393	0.030337	0.505453	0.513059	0.266906	0.280359	0.357641	0.205155	0.248593	0.256408	0.178478	0.159724	0.136224	0.11015	0.082484	0.203136	0.14786	0.171496	0.176449	0.176449
394	0.030484	0.504735	0.513007	0.266889	0.280405	0.357227	0.204759	0.248388	0.256842	0.178372	0.159271	0.135976	0.109896	0.082066	0.203016	0.147553	0.171194	0.176061	0.176061
395	0.030303	0.503545	0.512459	0.266754	0.280495	0.356297	0.204706	0.248503	0.256923	0.178019	0.158697	0.135852	0.109513	0.081754	0.202397	0.147122	0.170706	0.175683	0.175683
396	0.029735	0.502542	0.511689	0.266114	0.280096	0.35514	0.204349	0.248224	0.256595	0.177854	0.158045	0.135465	0.108632	0.081159	0.201473	0.146481	0.170177	0.175166	0.175166
397	0.02902	0.501507	0.510695	0.265768	0.279391	0.354246	0.203828	0.247954	0.255912	0.177084	0.157412	0.134769	0.108075	0.080922	0.200969	0.146147	0.169818	0.174606	0.174606
398	0.028349	0.500439	0.50972	0.265207	0.27925	0.353096	0.203506	0.247486	0.255078	0.176209	0.156896	0.13393	0.107197	0.080311	0.200185	0.145954	0.169517	0.174355	0.174355
399	0.027595	0.498482	0.508621	0.264746	0.278904	0.351862	0.20294	0.247105	0.25448	0.175827	0.156375	0.133542	0.106777	0.079891	0.20005	0.145457	0.169237	0.174197	0.174197
400	0.026708	0.497084	0.507633	0.264275	0.278034	0.350602	0.202529	0.246428	0.253823	0.175672	0.155358	0.133127	0.106145	0.079337	0.199566	0.144842	0.168779	0.173647	0.173647
401	0.025463	0.495626	0.506484	0.263311	0.277153	0.349266	0.201733	0.245434	0.253713	0.176022	0.154627	0.132913	0.105585	0.078764	0.199651	0.144239	0.168141	0.173079	0.173079
402	0.024323	0.494153	0.505363	0.262524	0.276358	0.347875	0.201038	0.244903	0.252727	0.175349	0.153455	0.132133	0.104634	0.078013	0.199071	0.143788	0.167561	0.172469	0.172469
403	0.023078	0.491851	0.503677	0.261626	0.275498	0.34668	0.200237	0.244088	0.252127	0.174868	0.15273	0.131795	0.103975	0.077364	0.198718	0.143098	0.167092	0.172082	0.172082
404	0.021663	0.490113	0.502135	0.260567	0.274691	0.345162	0.199521	0.243131	0.251335	0.174312	0.151836	0.131175	0.103397	0.07672	0.198217	0.142662	0.166691	0.171684	0.171684
405	0.020458	0.48806	0.500628	0.260102	0.27362	0.343611	0.19923	0.242317	0.25042	0.173698	0.150993	0.13057	0.102526	0.075834	0.197822	0.142154	0.166164	0.171204	0.171204
406	0.019485	0.486748	0.499139	0.259038	0.272905	0.34188	0.19835	0.241336	0.249684	0.173299	0.149988	0.130296	0.101925	0.075429	0.197708	0.141521	0.165555	0.17065	0.17065
407	0.018284	0.484844	0.497895	0.258069	0.271792	0.340773	0.197595	0.240604	0.249146	0.17289	0.149102	0.130139	0.10115	0.074861	0.197437	0.14104	0.165127	0.170164	0.170164
408	0.017367	0.483071	0.49625	0.257224	0.270828	0.339283	0.19686	0.239902	0.248349	0.17207	0.148275	0.129493	0.100507	0.074181	0.197033	0.140411	0.164633	0.169623	0.169623
409	0.016346	0.481395	0.495039	0.256669	0.270266	0.337805	0.196264	0.239236	0.247563	0.171538	0.14723	0.129231	0.099864	0.073701	0.196672	0.139879	0.164045	0.169216	0.169216
410	0.015597	0.479473	0.493423	0.255878	0.26935	0.336632	0.195578	0.238637	0.246924	0.170669	0.146559	0.129276	0.0992	0.073295	0.196124	0.139617	0.163728	0.168824	0.168824
411	0.014823	0.478192	0.492669	0.255204	0.268775	0.335735	0.195061	0.238053	0.246359	0.169915	0.145863	0.129254	0.098667	0.072822	0.195809	0.139042	0.163267	0.168373	0.168373
412	0.014254	0.47643	0.49102	0.254902	0.268264	0.334411	0.194682	0.237694	0.245685	0.169506	0.145147	0.128861	0.098276	0.072424	0.19538	0.138681	0.162824	0.167957	0.167957
413	0.013749	0.475185	0.489986	0.25435	0.267754	0.333156	0.194216	0.237077	0.245042	0.169218	0.144449	0.128548	0.097686	0.072044	0.194982	0.138075	0.162223	0.167372	0.167372
414	0.013458	0.473659	0.48893	0.254043	0.267139	0.33191	0.194113	0.236812	0.244697	0.168793	0.143901	0.12825	0.097389	0.071772	0.194693	0.137733	0.162057	0.167082	0.167082
415	0.013255	0.472333	0.487519	0.253609	0.266747	0.330553	0.193841	0.236557	0.24423	0.168436	0.143295	0.127939	0.096935	0.071484	0.194301	0.13716	0.161516	0.166555	0.166555
416	0.013094	0.471271	0.486681	0.253452	0.2665	0.329471	0.193773	0.236335	0.24377	0.168213	0.142666	0.127788	0.096626	0.071138	0.194065	0.136698	0.161228	0.166242	0.166242
417	0.012981	0.469605	0.48557	0.253234	0.26596	0.328323	0.193545	0.235857	0.243116	0.168029	0.142071	0.12742	0.096283	0.070886	0.193628	0.136227	0.160697	0.16583	0.16583
418	0.012996	0.468786	0.48461	0.252931	0.265676	0.327398	0.19357	0.235807	0.242731	0.167902	0.141744	0.127277	0.095755	0.070632	0.193339	0.135779	0.16038	0.165397	0.165397
419	0.013058	0.467362	0.483464	0.252617	0.265314	0.32639	0.193266	0.23555	0.242243	0.167517	0.141	0.127066	0.095412	0.07043	0.192928	0.135226	0.159856	0.165002	0.165002
420	0.013032	0.466092	0.482873	0.252212	0.264835	0.325355	0.193002	0.235263	0.24189	0.167283	0.140704	0.127083	0.0952	0.070132	0.192779	0.134932	0.159531	0.16449	0.16449
421	0.01329	0.465078	0.481748	0.252273	0.264551	0.324432	0.193077	0.23516	0.241608	0.167085	0.140116	0.126797	0.094981	0.070054	0.192399	0.134417	0.159078	0.163932	0.163932
422	0.013414	0.463942	0.480696	0.252494	0.264303	0.323621	0.193027	0.234956	0.241335	0.166713	0.139736	0.126694	0.094769	0.06989	0.191868	0.134149	0.158798	0.163767	0.163767
423	0.013736	0.462841	0.479648	0.252234	0.264006	0.322551	0.193041	0.234875	0.240943	0.166571	0.139257	0.12645	0.094346	0.069687	0.191418	0.133552	0.15834	0.163289	0.163289
424	0.014039	0.461926	0.47878	0.252282	0.263827	0.321669	0.192942	0.234837	0.240488	0.1663	0.138733	0.126323	0.094525	0.069456	0.191069	0.133145	0.157856	0.162912	0.162912
425	0.014498	0.461022	0.477769	0.252038	0.263722	0.320871	0.193031	0.235138	0.240091	0.166164	0.138321	0.126242	0.094229	0.069412	0.190693	0.132581	0.157404	0.162502	0.162502
426	0.014732	0.460014	0.476749	0.251872	0.263469	0.319779	0.193111	0.234927	0.239796	0.166008	0.137687	0.126159	0.093724	0.069168	0.190473	0.13214	0.15698	0.161893	0.161893
427	0.015254	0.458782	0.475953	0.251846	0.263385	0.318951	0.193247	0.234946	0.239395	0.165785	0.137246	0.125926	0.093497	0.068941	0.189971	0.131605	0.156348	0.161402	0.161402
428	0.015966	0.45791	0.474814	0.251936	0.263275	0.318093	0.193474	0.235032	0.238919	0.16539	0.136804	0.125902	0.093283	0.068711	0.190109	0.131183	0.15592	0.160955	0.160955
429	0.01602	0.456686	0.47388	0.251824	0.262839	0.31714	0.19335	0.234724	0.238355	0.164907	0.136408	0.125501	0.093015	0.068625	0.189622	0.130693	0.155414	0.160669	0.160669
430	0.016436	0.455689	0.472996	0.251829	0.262679	0.316157	0.193414	0.234655	0.238026	0.164897	0.136203	0.125436	0.092526	0.068422	0.188616	0.130169	0.154975	0.160212	0.160212
431	0.016768	0.454385	0.471735	0.251554	0.262451	0.315008	0.193424	0.234476	0.237657	0.164904	0.135521	0.125458	0.092318	0.068334	0.188421	0.129724	0.154579	0.159619	0.159619
432	0.017264	0.453243	0.470265	0.251525	0.262339	0.313889	0.193569	0.234551	0.237131	0.164622	0.135232	0.12506	0.09218	0.068339	0.187666	0.129363	0.154131	0.159282	0.159282
433	0.017924	0.452525	0.469372	0.25157	0.26224	0.312899	0.19385	0.23455	0.236572	0.164188	0.134638	0.124929	0.091845	0.067981	0.18732	0.128843	0.153807	0.158698	0.158698
434	0.01841	0.451314	0.468354	0.251401	0.261965	0.312044	0.193889	0.234502	0.235934	0.163945	0.134276	0.124702	0.09179	0.068017	0.187274	0.12838	0.15354	0.15825	0.15825
435	0.018972	0.449972	0.46706	0.251258	0.261615	0.310761	0.193884	0.234432	0.235459	0.163663	0.133769	0.124677	0.091336	0.067769	0.186912	0.127835	0.153089	0.157716	0.157716
436	0.019672	0.448578	0.466179	0.251389	0.261574	0.309677	0.193804	0.234428	0.234857	0.163191	0.13316	0.124473	0.091089	0.067673	0.186272	0.127174	0.152548	0.157234	0.157234
437	0.020083	0.447317	0.464612	0.251119	0.26121	0.308473	0.193652	0.234102	0.234838	0.163045	0.132603	0.124478	0.090798	0.06755	0.185897	0.126589	0.151965	0.15666	0.15666
438	0.02081	0.446186	0.463256	0.251004	0.260934	0.307191	0.193545	0.233965	0.2343	0.162835	0.132004	0.124344	0.090489	0.067199	0.185397	0.125903	0.151454	0.156007	0.156007
439	0.021739	0.444675	0.461824	0.251149	0.260899	0.306057	0.193554	0.233826	0.233449	0.162318	0.131345	0.123939	0.090182	0.067152	0.184341	0.125274	0.150791	0.155363	0.155363
440	0.022281	0.443258	0.460721	0.251169	0.260196	0.304794	0.19363	0.233313	0.232868	0.162238	0.130836	0.123878	0.089927	0.066969	0.183797	0.124746	0.150354	0.155025	0.155025
441	0.023003	0.442072	0.459485	0.2511	0.259805	0.303553	0.193756	0.232664	0.232431	0.16189	0.130337	0.123959	0.089688	0.066963	0.183434	0.124161	0.149895	0.154394	0.154394
442	0.023667	0.440556	0.458039	0.251013	0.259604	0.30227	0.19388	0.232804	0.231669	0.161576	0.129722	0.123601	0.089355	0.066696	0.182623	0.123546	0.149059	0.15384	0.15384
443	0.024482	0.439011	0.456833	0.250872	0.259337	0.30095	0.194187	0.232828	0.230907	0.161103	0.12916	0.123306	0.089132	0.066724	0.182029	0.123094	0.148519	0.153366	0.153366
444	0.025168	0.437555	0.455707	0.250813	0.25891	0.299715	0.194507	0.232526	0.230062	0.160474	0.128656	0.122904	0.088748	0.06654	0.181184	0.122497	0.148042	0.1526	0.1526
445	0.025829	0.436483	0.45413	0.250489	0.258283	0.298457	0.194833	0.232101	0.229393	0.160141	0.128057	0.122735	0.088399	0.066498	0.180638	0.121924	0.147576	0.152026	0.152026
446	0.026486	0.435077	0.453033	0.250276	0.25804	0.29743	0.195098	0.232143	0.228666	0.159714	0.127627	0.122611	0.088377	0.066409	0.179969	0.121385	0.14696	0.151457	0.151457
447	0.027418	0.434045	0.451684	0.250191	0.257858	0.296205	0.195376	0.231866	0.228111	0.159325	0.127227	0.122349	0.088177	0.066387	0.179252	0.120921	0.146555	0.151033	0.151033
448	0.028295	0.433059	0.450184	0.250159	0.257447	0.295066	0.195524	0.232017	0.227346	0.158673	0.126791	0.122107	0.087698	0.06632	0.178362	0.120056	0.145934	0.150429	0.150429
449	0.028917	0.431822	0.449032	0.249964	0.257189	0.29422	0.195556	0.231865	0.226822	0.158376	0.126459	0.121914	0.087691	0.066216	0.177716	0.119629	0.145629	0.150129	0.150129
450	0.029404	0.431635	0.448961	0.250313	0.257022	0.293499	0.19574	0.232076	0.226212	0.158052	0.125968	0.121655	0.087617	0.066248	0.177148	0.119588	0.145346	0.149905	0.149905
451	0.031395	0.426934	0.445272	0.251019	0.257374	0.290568	0.196687	0.232754	0.226715	0.158715	0.124967	0.121426	0.086686	0.065911	0.177086	0.117852	0.144242	0.148555	0.148555
452	0.032481	0.425317	0.443879	0.251328	0.257321	0.289142	0.197014	0.232875	0.226492	0.158627	0.123989	0.121514	0.086184	0.065451	0.176547	0.117036	0.14327	0.147632	0.147632
453	0.033382	0.423633	0.442784	0.251035	0.257117	0.28783	0.197084	0.232756	0.226094	0.15894	0.123739	0.121559	0.085982	0.065504	0.176258	0.116341	0.142699	0.14696	0.14696
454	0.034117	0.422098	0.440951	0.250984	0.256544	0.286751	0.19726	0.232826	0.225985	0.159181	0.123062	0.121626	0.085827	0.065233	0.175812	0.115653	0.141776	0.146427	0.146427
455	0.035041	0.420423	0.439813	0.251168	0.256515	0.285324	0.197361	0.232566	0.225612	0.159286	0.12254	0.121682	0.085467	0.064659	0.175169	0.114906	0.140722	0.145741	0.145741
456	0.036049	0.41869	0.438342	0.251285	0.256464	0.284176	0.197738	0.232713	0.225548	0.159132	0.122221	0.121743	0.085496	0.064779	0.174769	0.114594	0.140302	0.145045	0.145045
457	0.03706	0.417172	0.436928	0.251398	0.256398	0.282943	0.198111	0.232768	0.225245	0.159035	0.121564	0.121627	0.085181	0.06468	0.174443	0.11394	0.139605	0.144486	0.144486
458	0.038107	0.416156	0.43599	0.251447	0.256426	0.282071	0.198382	0.232862	0.225155	0.158916	0.121125	0.12182	0.084832	0.064489	0.174276	0.113299	0.139049	0.143915	0.143915
459	0.038918	0.414277	0.434494	0.251493	0.256158	0.280974	0.19873	0.232634	0.224962	0.158906	0.120607	0.121875	0.084561	0.064396	0.173743	0.112581	0.138504	0.143285	0.143285
460	0.040118	0.412705	0.433356	0.251838	0.256201	0.27982	0.199013	0.232874	0.224754	0.15878	0.120129	0.121794	0.084256	0.064155	0.173295	0.112207	0.137797	0.142554	0.142554
461	0.041078	0.411398	0.431859	0.251783	0.255909	0.27876	0.199404	0.232797	0.224272	0.158655	0.119678	0.121618	0.084052	0.064164	0.172843	0.111435	0.137355	0.141964	0.141964
462	0.042066	0.409878	0.430706	0.251971	0.25576	0.277832	0.199699	0.232721	0.223979	0.158673	0.119345	0.121784	0.084108	0.064182	0.172515	0.111085	0.136868	0.141445	0.141445
463	0.043216	0.40878	0.429697	0.252169	0.255696	0.276857	0.200055	0.232913	0.223848	0.158482	0.118905	0.121876	0.083947	0.064279	0.172217	0.110641	0.136325	0.140879	0.140879
464	0.044165	0.407183	0.428391	0.252162	0.255396	0.275983	0.200159	0.232733	0.223904	0.158712	0.118575	0.122192	0.083835	0.064286	0.171943	0.110007	0.135753	0.14045	0.14045
465	0.045178	0.406117	0.427232	0.252044	0.255543	0.275011	0.200433	0.232935	0.223519	0.158434	0.118211	0.122103	0.083656	0.064161	0.171462	0.109504	0.135273	0.139944	0.139944
466	0.046231	0.404847	0.426138	0.252085	0.255663	0.274066	0.200933	0.232781	0.223415	0.158431	0.117423	0.122128	0.083566	0.064132	0.17102	0.109036	0.134767	0.139194	0.139194
467	0.047053	0.403729	0.425008	0.252125	0.255365	0.273284	0.201136	0.232775	0.223199	0.158253	0.117273	0.122125	0.083469	0.06435	0.170498	0.108597	0.134386	0.138969	0.138969
468	0.048181	0.402494	0.423959	0.252588	0.255628	0.272442	0.201689	0.2328	0.222884	0.158033	0.117062	0.122122	0.083515	0.064376	0.170234	0.108226	0.133996	0.138557	0.138557
469	0.049091	0.401509	0.423072	0.252744	0.255659	0.271679	0.20212	0.232452	0.222764	0.158072	0.116636	0.122204	0.083338	0.064224	0.169845	0.107678	0.133346	0.138034	0.138034
470	0.050339	0.400513	0.4221	0.253076	0.255453	0.270791	0.202584	0.23266	0.222391	0.157998	0.116392	0.122078	0.083269	0.064302	0.169524	0.107177	0.132935	0.137529	0.137529
471	0.051245	0.399497	0.421127	0.253067	0.255569	0.27004	0.202784	0.232699	0.222369	0.157927	0.116076	0.122262	0.082936	0.064152	0.169379	0.106753	0.132348	0.136839	0.136839
472	0.052261	0.398509	0.420186	0.253305	0.255529	0.269444	0.202961	0.23282	0.222157	0.157794	0.115901	0.122289	0.082923	0.064264	0.168948	0.106265	0.131934	0.136512	0.136512
473	0.053308	0.397697	0.419307	0.253696	0.255484	0.268491	0.203416	0.232908	0.222189	0.157751	0.115991	0.122333	0.082919	0.064341	0.168609	0.105861	0.131355	0.135817	0.135817
474	0.054529	0.396604	0.418616	0.25416	0.255517	0.267899	0.203899	0.232954	0.222117	0.157969	0.115618	0.122621	0.082827	0.064358	0.168449	0.105379	0.130926	0.135384	0.135384
475	0.05573	0.395943	0.417809	0.254799	0.255566	0.267271	0.204331	0.233093	0.222005	0.157817	0.115429	0.122681	0.082704	0.064393	0.168002	0.104931	0.130536	0.134607	0.134607
476	0.056844	0.395115	0.41698	0.25523	0.255811	0.26675	0.204618	0.233422	0.221967	0.157839	0.11525	0.123008	0.082811	0.064318	0.167619	0.104624	0.130236	0.134241	0.134241
477	0.057928	0.394407	0.416194	0.25551	0.255834	0.266086	0.205141	0.233555	0.221961	0.157689	0.114897	0.123081	0.082663	0.06435	0.167384	0.10417	0.129723	0.133923	0.133923
478	0.059218	0.393642	0.415437	0.255524	0.25601	0.26539	0.205703	0.23384	0.22197	0.157791	0.114655	0.123087	0.082496	0.06441	0.16695	0.103734	0.12928	0.133614	0.133614
479	0.060215	0.393029	0.414878	0.255661	0.25627	0.264854	0.206156	0.234118	0.22213	0.157813	0.114478	0.123248	0.082569	0.064459	0.166837	0.103402	0.128868	0.133249	0.133249
480	0.061461	0.392502	0.414443	0.25606	0.256611	0.264327	0.206704	0.234354	0.222197	0.158058	0.114166	0.123424	0.082543	0.064537	0.166705	0.102846	0.128385	0.132882	0.132882
481	0.062614	0.391879	0.413651	0.256368	0.25657	0.26362	0.207118	0.23464	0.222108	0.157955	0.11392	0.123535	0.082377	0.064597	0.166519	0.102372	0.127772	0.132287	0.132287
482	0.063522	0.391185	0.41317	0.256663	0.256629	0.263467	0.207506	0.234715	0.222087	0.158106	0.113956	0.124118	0.082562	0.064978	0.166421	0.10224	0.127642	0.132151	0.132151
483	0.064642	0.390701	0.412631	0.257082	0.257006	0.262892	0.208005	0.234951	0.221961	0.158131	0.113789	0.124603	0.082367	0.065069	0.16615	0.101728	0.127249	0.13167	0.13167
484	0.06559	0.390346	0.412246	0.257286	0.257138	0.262545	0.208196	0.235202	0.221947	0.158183	0.113823	0.12475	0.082443	0.065147	0.165899	0.101593	0.126991	0.131387	0.131387
485	0.066033	0.390162	0.41176	0.257462	0.257121	0.262376	0.208351	0.235176	0.222042	0.158277	0.113794	0.1249	0.082419	0.065097	0.165941	0.101478	0.126901	0.13135	0.13135
486	0.068188	0.388929	0.410416	0.258561	0.257653	0.261208	0.209317	0.235803	0.22221	0.158144	0.113355	0.125409	0.082368	0.065271	0.165524	0.100689	0.12605	0.130687	0.130687
487	0.069057	0.388162	0.409811	0.258704	0.257657	0.26094	0.209645	0.236151	0.222297	0.158355	0.113286	0.125457	0.082211	0.065205	0.165342	0.10017	0.125708	0.130047	0.130047
488	0.070234	0.38795	0.409077	0.259056	0.257958	0.260229	0.20977	0.236327	0.221956	0.158249	0.112929	0.125367	0.082286	0.065191	0.165041	0.099728	0.125178	0.129774	0.129774
489	0.071212	0.387115	0.408647	0.259441	0.258253	0.259582	0.210244	0.236519	0.222123	0.158405	0.112542	0.125676	0.081922	0.065394	0.164979	0.099423	0.124789	0.129217	0.129217
490	0.071795	0.386273	0.407691	0.25945	0.258175	0.259108	0.210289	0.236402	0.22216	0.158527	0.112522	0.125543	0.082143	0.0656	0.164693	0.099151	0.124508	0.129075	0.129075
491	0.072782	0.385317	0.406966	0.259976	0.258405	0.258467	0.210575	0.236887	0.222115	0.158363	0.112411	0.125725	0.082018	0.065427	0.164289	0.099003	0.124231	0.128727	0.128727
492	0.073815	0.384382	0.405922	0.260321	0.258425	0.257775	0.211022	0.236953	0.221923	0.157984	0.11218	0.125566	0.081915	0.065376	0.163905	0.098422	0.123707	0.128044	0.128044
493	0.074573	0.383499	0.405218	0.260337	0.258358	0.256601	0.211236	0.236693	0.221508	0.157942	0.111802	0.125599	0.081666	0.065449	0.163623	0.098066	0.123434	0.127596	0.127596
494	0.075325	0.382646	0.404251	0.260412	0.258237	0.256172	0.211501	0.2368	0.221324	0.157917	0.111456	0.125496	0.081647	0.065238	0.163233	0.097594	0.122949	0.127248	0.127248
495	0.075872	0.381686	0.403222	0.260599	0.258229	0.25571	0.211724	0.23708	0.221188	0.158061	0.111529	0.125766	0.08158	0.065414	0.163214	0.097432	0.122851	0.126889	0.126889
496	0.076692	0.380634	0.402387	0.260854	0.258099	0.254489	0.211987	0.237103	0.220952	0.157916	0.110785	0.125719	0.081049	0.064741	0.162907	0.09672	0.121972	0.126029	0.126029
497	0.077082	0.379636	0.401704	0.260794	0.257814	0.25382	0.21192	0.236709	0.22065	0.157753	0.110469	0.125978	0.081061	0.064999	0.162528	0.096298	0.12176	0.125822	0.125822
498	0.077824	0.378467	0.400534	0.260931	0.25758	0.252898	0.212033	0.236843	0.220138	0.157459	0.109875	0.125684	0.08081	0.06485	0.162183	0.095915	0.121224	0.125445	0.125445
499	0.078066	0.377327	0.399545	0.260574	0.257098	0.252254	0.21183	0.236886	0.219818	0.1572	0.109829	0.12544	0.080669	0.06501	0.161626	0.095641	0.12107	0.125141	0.125141
500	0.078442	0.376113	0.398584	0.260754	0.256819	0.25125	0.21218	0.236923	0.219462	0.156919	0.109352	0.125439	0.08043	0.064664	0.161327	0.094932	0.120469	0.124591	0.124591
501	0.078542	0.375157	0.397381	0.260589	0.256403	0.250311	0.211926	0.236515	0.219246	0.157018	0.108789	0.12547	0.080234	0.064356	0.161245	0.094795	0.120023	0.124344	0.124344
502	0.079081	0.373908	0.396702	0.260446	0.256127	0.249446	0.212153	0.236341	0.218959	0.156801	0.108295	0.125182	0.07982	0.06407	0.160671	0.094302	0.119567	0.123951	0.123951
503	0.079397	0.372694	0.395584	0.260318	0.256096	0.248601	0.212057	0.236165	0.218434	0.156389	0.108069	0.124954	0.079816	0.064137	0.16016	0.093917	0.119313	0.123603	0.123603
504	0.079587	0.371442	0.394473	0.260036	0.255967	0.247639	0.211752	0.235871	0.218204	0.156058	0.107662	0.124961	0.079337	0.063943	0.159926	0.093571	0.118721	0.123042	0.123042
505	0.079905	0.370105	0.393588	0.260034	0.255647	0.246593	0.211674	0.235532	0.217921	0.155915	0.107076	0.124924	0.07896	0.063484	0.159605	0.093054	0.118268	0.122686	0.122686
506	0.080144	0.369093	0.392149	0.259713	0.255325	0.245867	0.211668	0.235424	0.217312	0.155422	0.106842	0.124506	0.078853	0.063501	0.159136	0.092959	0.118111	0.122376	0.122376
507	0.080357	0.367884	0.391317	0.259772	0.255018	0.24498	0.211584	0.235159	0.216794	0.155233	0.106409	0.124276	0.078583	0.063274	0.158649	0.092293	0.117967	0.122077	0.122077
508	0.080494	0.366834	0.390375	0.259591	0.254569	0.244158	0.211396	0.234864	0.216522	0.154786	0.10598	0.124124	0.078374	0.063073	0.158075	0.091958	0.117576	0.121667	0.121667
509	0.081055	0.365834	0.389563	0.259522	0.254244	0.243182	0.21152	0.234782	0.216129	0.154583	0.105614	0.123949	0.078016	0.062986	0.157616	0.091463	0.117121	0.121303	0.121303
510	0.08137	0.364599	0.388259	0.259524	0.254105	0.242521	0.211576	0.234597	0.215816	0.154284	0.105142	0.12394	0.077932	0.062773	0.157412	0.091155	0.116748	0.120863	0.120863
511	0.081575	0.363699	0.387563	0.259227	0.25376	0.241823	0.211403	0.234665	0.215361	0.154127	0.104615	0.123642	0.077494	0.062621	0.156967	0.090635	0.116388	0.120403	0.120403
512	0.081857	0.362919	0.386804	0.259166	0.253764	0.241001	0.211595	0.234508	0.21506	0.153936	0.104301	0.123608	0.077302	0.062407	0.156686	0.09031	0.115953	0.120141	0.120141
513	0.082585	0.362008	0.386068	0.259183	0.253548	0.240334	0.211611	0.234355	0.215038	0.153826	0.104129	0.123669	0.077139	0.062222	0.156656	0.090096	0.115729	0.119911	0.119911
514	0.083042	0.361159	0.38536	0.259172	0.253203	0.239622	0.211727	0.23428	0.214622	0.153583	0.103639	0.123666	0.076912	0.061905	0.15635	0.089456	0.115149	0.119609	0.119609
515	0.083283	0.360641	0.384744	0.259068	0.253037	0.239145	0.211646	0.234064	0.214478	0.152876	0.103317	0.123462	0.076854	0.061926	0.155902	0.089344	0.114895	0.119159	0.119159
516	0.084147	0.360203	0.384318	0.25931	0.253047	0.238675	0.212031	0.234417	0.214352	0.152993	0.103168	0.123589	0.076531	0.061733	0.155598	0.089025	0.114614	0.118914	0.118914
517	0.084975	0.359545	0.383535	0.259481	0.253033	0.238459	0.21222	0.234441	0.214162	0.153115	0.102842	0.123634	0.076477	0.061794	0.155612	0.088781	0.114405	0.118652	0.118652
518	0.085918	0.359074	0.383291	0.259757	0.253156	0.238091	0.21263	0.234653	0.214146	0.152756	0.102637	0.123513	0.076429	0.061541	0.155309	0.088421	0.113878	0.118265	0.118265
519	0.086862	0.358853	0.382757	0.259789	0.25323	0.237743	0.212779	0.23491	0.214122	0.152958	0.102467	0.123616	0.076552	0.061831	0.155083	0.088275	0.113727	0.118133	0.118133
520	0.087919	0.358472	0.382543	0.260128	0.253275	0.237457	0.213094	0.235023	0.214222	0.153118	0.102283	0.123799	0.076571	0.061692	0.154859	0.087731	0.113418	0.117739	0.117739
521	0.089251	0.358406	0.382053	0.260524	0.253865	0.237371	0.213565	0.235389	0.214208	0.153069	0.10238	0.123952	0.076714	0.061878	0.154742	0.087445	0.113211	0.117718	0.117718
522	0.090582	0.358084	0.381994	0.261074	0.254062	0.237249	0.214358	0.235915	0.214373	0.153172	0.102267	0.123842	0.076738	0.061901	0.154433	0.087317	0.11304	0.117386	0.117386
523	0.091988	0.358182	0.381773	0.261424	0.254349	0.237334	0.21492	0.236226	0.214706	0.15339	0.102175	0.124217	0.076734	0.062143	0.154449	0.087043	0.112664	0.117022	0.117022
524	0.09367	0.358268	0.381832	0.262152	0.254659	0.237465	0.215485	0.236853	0.215089	0.153415	0.10236	0.124224	0.076954	0.062363	0.154074	0.086948	0.112574	0.1169	0.1169
525	0.095354	0.358623	0.382039	0.262481	0.255222	0.237601	0.216243	0.237286	0.215381	0.153661	0.102307	0.124574	0.076966	0.06256	0.154081	0.086525	0.112213	0.116542	0.116542
526	0.097113	0.358805	0.382044	0.263308	0.255872	0.237931	0.217054	0.238065	0.215804	0.154176	0.102355	0.124922	0.077159	0.062578	0.154052	0.086277	0.111926	0.116444	0.116444
527	0.098972	0.359195	0.382227	0.264153	0.256395	0.238468	0.217879	0.238754	0.216028	0.15448	0.102355	0.125037	0.077546	0.063005	0.153769	0.086119	0.111854	0.11631	0.11631
528	0.101278	0.359817	0.382697	0.265067	0.257279	0.2387	0.218955	0.239563	0.216552	0.154769	0.102515	0.125453	0.077714	0.06314	0.153843	0.085706	0.111546	0.115945	0.115945
529	0.10354	0.360434	0.382863	0.26613	0.258267	0.239154	0.220071	0.240418	0.217118	0.155284	0.102952	0.126055	0.078051	0.063625	0.153948	0.085533	0.111234	0.115946	0.115946
530	0.105886	0.361221	0.383336	0.267091	0.259101	0.239572	0.22112	0.241265	0.217879	0.15565	0.103235	0.12671	0.078278	0.064018	0.153881	0.085343	0.111214	0.115694	0.115694
531	0.10853	0.362011	0.383883	0.268306	0.259944	0.240053	0.222342	0.242305	0.218557	0.156382	0.103375	0.127079	0.078551	0.064462	0.15393	0.08514	0.110903	0.115438	0.115438
532	0.111253	0.363236	0.384713	0.269532	0.261008	0.240649	0.223674	0.243235	0.219309	0.156769	0.103774	0.12754	0.078825	0.064947	0.153883	0.085002	0.110772	0.115578	0.115578
533	0.114164	0.364315	0.385447	0.270749	0.262058	0.241452	0.224979	0.24418	0.220255	0.157665	0.104343	0.128256	0.079223	0.065446	0.154151	0.084705	0.110664	0.115465	0.115465
534	0.11719	0.365822	0.386385	0.272156	0.263261	0.242365	0.226473	0.245327	0.221179	0.158145	0.104746	0.128763	0.079665	0.065952	0.153997	0.084643	0.110374	0.11524	0.11524
535	0.12102	0.367089	0.38719	0.274021	0.264853	0.243227	0.228237	0.246737	0.222336	0.159352	0.105196	0.129613	0.080197	0.066384	0.154262	0.084472	0.110185	0.114892	0.114892
536	0.124529	0.368436	0.388081	0.275797	0.266343	0.244201	0.230134	0.248104	0.223397	0.16023	0.105941	0.130255	0.080769	0.067055	0.15437	0.084613	0.110162	0.114757	0.114757
537	0.128158	0.370166	0.389281	0.277359	0.268049	0.245456	0.231928	0.24966	0.224573	0.160968	0.106595	0.131076	0.081443	0.067716	0.154655	0.084466	0.110088	0.114635	0.114635
538	0.13215	0.371996	0.390651	0.279299	0.269801	0.246596	0.233818	0.251314	0.226025	0.161837	0.107131	0.131863	0.082232	0.068399	0.154858	0.084383	0.110037	0.114534	0.114534
539	0.136285	0.37405	0.391818	0.281406	0.271458	0.247989	0.235757	0.252888	0.227209	0.162994	0.108097	0.132754	0.082984	0.069328	0.155168	0.084345	0.110029	0.11449	0.11449
540	0.140571	0.376223	0.393472	0.28355	0.273444	0.249401	0.237919	0.254648	0.22875	0.163892	0.109109	0.13379	0.083795	0.069968	0.15555	0.084177	0.109828	0.114231	0.114231
541	0.144979	0.378062	0.394916	0.285688	0.275484	0.251028	0.240163	0.256489	0.23041	0.165115	0.109942	0.134778	0.084632	0.070926	0.155946	0.084144	0.109655	0.114119	0.114119
542	0.149871	0.380479	0.396559	0.288186	0.277759	0.252577	0.242588	0.258745	0.231787	0.166166	0.110783	0.135651	0.085566	0.071769	0.156081	0.084006	0.109674	0.113964	0.113964
543	0.154818	0.382838	0.398291	0.290675	0.279925	0.254268	0.245183	0.260715	0.233678	0.167229	0.111737	0.13681	0.086319	0.072635	0.156472	0.084032	0.109572	0.113884	0.113884
544	0.159891	0.385332	0.399987	0.293061	0.282181	0.255987	0.247782	0.263137	0.235648	0.168681	0.112792	0.138092	0.087358	0.073683	0.15694	0.08391	0.109419	0.11366	0.11366
545	0.165267	0.388144	0.402034	0.295782	0.284732	0.258031	0.250618	0.265398	0.237459	0.170143	0.113829	0.139341	0.088429	0.074726	0.157509	0.083995	0.10927	0.113622	0.113622
546	0.170967	0.391306	0.404163	0.298847	0.287431	0.26017	0.253533	0.267761	0.239867	0.171788	0.115129	0.140841	0.089702	0.075867	0.158023	0.083927	0.10931	0.113659	0.113659
547	0.176748	0.394579	0.406525	0.301724	0.290244	0.262457	0.256471	0.270311	0.24189	0.173022	0.116542	0.14205	0.09095	0.077198	0.158411	0.084055	0.109339	0.113714	0.113714
548	0.183062	0.397639	0.408713	0.304792	0.293321	0.264814	0.259666	0.273214	0.244353	0.174731	0.117769	0.143626	0.092131	0.078357	0.159075	0.083917	0.109146	0.11348	0.11348
549	0.18918	0.401129	0.411074	0.307861	0.296227	0.266952	0.262895	0.275902	0.246795	0.176341	0.119094	0.145178	0.093311	0.079593	0.159777	0.083884	0.109007	0.11339	0.11339
550	0.195468	0.404605	0.413596	0.311353	0.299276	0.26959	0.266197	0.278689	0.249195	0.178227	0.120336	0.146711	0.094658	0.080857	0.16031	0.084063	0.109089	0.113462	0.113462
551	0.202055	0.408325	0.41609	0.31471	0.302505	0.27207	0.269509	0.281705	0.251742	0.179894	0.121582	0.148189	0.095921	0.082063	0.160898	0.084035	0.108904	0.113388	0.113388
552	0.208857	0.412087	0.418823	0.318257	0.305688	0.274853	0.273035	0.284732	0.254396	0.181779	0.123192	0.149564	0.097349	0.083478	0.161562	0.084087	0.109041	0.113427	0.113427
553	0.215301	0.41596	0.421733	0.32163	0.308788	0.277475	0.27632	0.287596	0.256705	0.183357	0.124809	0.150983	0.098852	0.084906	0.162104	0.084165	0.109107	0.113413	0.113413
554	0.222119	0.419847	0.424479	0.325365	0.312326	0.280168	0.279853	0.290833	0.259423	0.185135	0.126273	0.152646	0.100308	0.086215	0.162771	0.084013	0.108796	0.113231	0.113231
555	0.229155	0.423834	0.427332	0.328826	0.315516	0.283095	0.283436	0.294023	0.261947	0.18703	0.127939	0.154363	0.101822	0.087836	0.163405	0.084219	0.108982	0.113269	0.113269
556	0.236361	0.428177	0.430393	0.332593	0.318943	0.286049	0.287197	0.297156	0.264699	0.188943	0.129605	0.155959	0.103347	0.089189	0.164039	0.084269	0.108932	0.11323	0.11323
557	0.2438	0.432361	0.433331	0.336251	0.32235	0.289047	0.290862	0.300605	0.267514	0.190931	0.131309	0.15781	0.104882	0.090727	0.164737	0.084366	0.108955	0.113207	0.113207
558	0.25135	0.436791	0.436641	0.340396	0.326053	0.292167	0.29498	0.304137	0.270371	0.192841	0.133213	0.159576	0.106585	0.092437	0.165434	0.084526	0.108984	0.113289	0.113289
559	0.259148	0.441406	0.43996	0.344365	0.329813	0.295568	0.298985	0.307647	0.273293	0.194927	0.135054	0.161393	0.108273	0.094135	0.166175	0.084693	0.109058	0.11352	0.11352
560	0.266842	0.446164	0.443278	0.348564	0.333469	0.298927	0.303042	0.311061	0.276188	0.197005	0.137002	0.163343	0.110271	0.095833	0.166824	0.084884	0.109161	0.113508	0.113508
561	0.274647	0.450959	0.44678	0.352538	0.337262	0.302342	0.307139	0.314628	0.279134	0.199134	0.138906	0.165226	0.112065	0.097386	0.167308	0.085062	0.109298	0.113627	0.113627
562	0.282294	0.455617	0.450331	0.356527	0.340996	0.305741	0.311115	0.318281	0.281844	0.201125	0.140829	0.166913	0.113824	0.099004	0.167874	0.085139	0.109229	0.113609	0.113609
563	0.290205	0.460481	0.453905	0.360731	0.34484	0.309328	0.314969	0.321972	0.284759	0.20321	0.142787	0.168782	0.11561	0.100775	0.168798	0.085237	0.109229	0.113609	0.113609
564	0.298434	0.465677	0.457599	0.364651	0.348758	0.313071	0.319165	0.325634	0.287413	0.205282	0.145	0.170786	0.117566	0.102585	0.169572	0.085667	0.109563	0.1137	0.1137
565	0.306845	0.471023	0.461524	0.369047	0.352854	0.3165	0.323481	0.329628	0.290585	0.207467	0.146885	0.172838	0.119303	0.104314	0.170349	0.085605	0.109428	0.113822	0.113822
566	0.315563	0.476216	0.465405	0.373658	0.356907	0.320263	0.327996	0.333433	0.293844	0.209599	0.149135	0.174414	0.121167	0.106178	0.171041	0.085813	0.109488	0.113781	0.113781
567	0.324232	0.481849	0.469306	0.378138	0.360904	0.324432	0.332281	0.337387	0.297274	0.212079	0.151311	0.176749	0.123222	0.108182	0.172181	0.086094	0.109334	0.11389	0.11389
568	0.333548	0.487751	0.47372	0.382718	0.365139	0.32865	0.337089	0.341373	0.300879	0.214612	0.153795	0.178767	0.125541	0.110288	0.172915	0.086608	0.109561	0.114068	0.114068
569	0.343265	0.493915	0.478433	0.387882	0.370039	0.33316	0.341999	0.345784	0.304039	0.217045	0.156104	0.181153	0.12765	0.112391	0.173901	0.086706	0.10965	0.114215	0.114215
570	0.353327	0.500731	0.483675	0.392958	0.375276	0.33809	0.347253	0.350507	0.308058	0.219895	0.159011	0.183501	0.130149	0.11467	0.175092	0.087216	0.110079	0.114647	0.114647
571	0.364089	0.507782	0.488855	0.398741	0.380281	0.342944	0.352676	0.355472	0.312269	0.222582	0.161613	0.186091	0.132543	0.116853	0.176535	0.087458	0.110207	0.114968	0.114968
572	0.375422	0.514951	0.494381	0.404339	0.38577	0.348405	0.358145	0.360409	0.316771	0.225698	0.164614	0.188676	0.135097	0.119468	0.178181	0.087916	0.11058	0.115226	0.115226
573	0.386718	0.522793	0.500025	0.410184	0.391573	0.353825	0.363893	0.365875	0.321465	0.229286	0.167711	0.19164	0.137747	0.121876	0.179829	0.088247	0.110839	0.115445	0.115445
574	0.398398	0.530724	0.506046	0.416346	0.397355	0.359406	0.369935	0.371225	0.326491	0.232933	0.170682	0.194887	0.140309	0.124581	0.181596	0.088645	0.111019	0.115563	0.115563
575	0.410696	0.539207	0.512607	0.42233	0.403293	0.365416	0.376095	0.376832	0.331512	0.236338	0.174071	0.19774	0.143079	0.12724	0.18317	0.089197	0.111318	0.115807	0.115807
576	0.423461	0.54796	0.519012	0.428871	0.409992	0.371924	0.382472	0.38304	0.336809	0.239913	0.177465	0.201018	0.146204	0.130192	0.18496	0.089903	0.111771	0.116181	0.116181
577	0.43701	0.557081	0.525839	0.436132	0.416982	0.378776	0.389303	0.389281	0.34227	0.243671	0.181334	0.204155	0.149335	0.1331	0.186788	0.090552	0.112263	0.116729	0.116729
578	0.451115	0.566513	0.533133	0.443123	0.423933	0.385579	0.396281	0.395967	0.348051	0.247595	0.185062	0.207391	0.152568	0.136122	0.188648	0.091194	0.112721	0.116997	0.116997
579	0.46607	0.577044	0.540747	0.450481	0.431254	0.392987	0.403585	0.402685	0.354188	0.251974	0.188897	0.211074	0.155978	0.139314	0.190884	0.091764	0.113397	0.117415	0.117415
580	0.480933	0.587906	0.549164	0.458743	0.438958	0.400982	0.411356	0.409976	0.360514	0.256612	0.193407	0.214912	0.159924	0.142891	0.193167	0.092715	0.113968	0.118041	0.118041
581	0.497223	0.599241	0.557982	0.467371	0.447496	0.409068	0.419635	0.417604	0.367548	0.261188	0.198043	0.219051	0.163699	0.146404	0.195484	0.093679	0.114631	0.11872	0.11872
582	0.5143	0.611505	0.567341	0.476343	0.456001	0.417846	0.428072	0.425841	0.374584	0.266118	0.202793	0.223147	0.16771	0.150218	0.197988	0.094575	0.115167	0.119163	0.119163
583	0.53161	0.623702	0.576402	0.485327	0.464528	0.426976	0.436547	0.434196	0.381741	0.270853	0.207743	0.227374	0.171946	0.153948	0.200493	0.095599	0.11612	0.119876	0.119876
584	0.546481	0.634359	0.584499	0.492916	0.471978	0.434687	0.444162	0.441087	0.388078	0.275397	0.21218	0.231242	0.175679	0.157431	0.202846	0.096578	0.116892	0.120643	0.120643
585	0.554094	0.63979	0.588571	0.496598	0.47591	0.438482	0.447589	0.444592	0.391071	0.277541	0.214049	0.233162	0.177315	0.159153	0.203904	0.0971	0.117115	0.120874	0.120874
586	0.585662	0.661239	0.606101	0.514723	0.494215	0.455342	0.464427	0.460898	0.408821	0.28977	0.224087	0.243226	0.185332	0.166755	0.210142	0.098789	0.118187	0.121248	0.121248
587	0.605548	0.676052	0.61751	0.524893	0.504708	0.46617	0.474767	0.470407	0.41763	0.295863	0.229913	0.248473	0.190471	0.171333	0.213191	0.100163	0.119273	0.122236	0.122236
588	0.626493	0.690964	0.628904	0.536114	0.515768	0.477012	0.485041	0.480684	0.426731	0.302144	0.235937	0.253787	0.195726	0.176112	0.216431	0.1014	0.120272	0.122984	0.122984
589	0.647872	0.706653	0.640761	0.547632	0.527169	0.488321	0.495862	0.490822	0.435805	0.3083	0.242228	0.259097	0.200805	0.180991	0.219371	0.102833	0.121361	0.124008	0.124008
590	0.669537	0.723003	0.653168	0.558993	0.538403	0.499934	0.50691	0.501472	0.445461	0.314831	0.248626	0.264526	0.206264	0.186071	0.222462	0.104325	0.122687	0.1251	0.1251
591	0.692195	0.73931	0.665425	0.570789	0.550041	0.511927	0.517902	0.512321	0.45515	0.321767	0.255403	0.270435	0.211869	0.191137	0.225742	0.105914	0.123854	0.126109	0.126109
592	0.71569	0.756343	0.678532	0.583388	0.562361	0.524103	0.52957	0.523601	0.465366	0.328766	0.262308	0.276229	0.217752	0.196502	0.229144	0.10747	0.125131	0.127155	0.127155
593	0.740209	0.774437	0.692105	0.596423	0.575423	0.536741	0.542084	0.535375	0.475877	0.336007	0.269377	0.28229	0.223529	0.201912	0.232723	0.108989	0.12625	0.128225	0.128225
594	0.765302	0.792885	0.705989	0.609216	0.588237	0.54981	0.554445	0.547247	0.487185	0.343464	0.276653	0.288715	0.229748	0.207617	0.236356	0.110768	0.127629	0.129475	0.129475
595	0.790915	0.811672	0.720072	0.622479	0.601607	0.563479	0.566964	0.55949	0.497969	0.351163	0.28436	0.295137	0.236015	0.213728	0.240042	0.112453	0.12905	0.130661	0.130661
596	0.816458	0.830171	0.734272	0.636192	0.615108	0.576671	0.580001	0.571883	0.50904	0.358759	0.291978	0.301639	0.242345	0.219434	0.24374	0.114219	0.130469	0.131869	0.131869
597	0.841895	0.849289	0.748443	0.649168	0.628251	0.589806	0.592598	0.584079	0.520022	0.366321	0.299536	0.308081	0.248844	0.225297	0.247616	0.116006	0.131986	0.133207	0.133207
598	0.866607	0.867817	0.762653	0.662082	0.640975	0.603085	0.605139	0.595853	0.53108	0.373731	0.307018	0.314406	0.255182	0.231095	0.251245	0.117854	0.133505	0.134496	0.134496
599	0.891308	0.885689	0.776121	0.675372	0.653948	0.615948	0.617447	0.607724	0.541318	0.38097	0.314397	0.320611	0.261345	0.236764	0.254785	0.11955	0.134838	0.135756	0.135756
600	0.915295	0.903404	0.789278	0.68815	0.666631	0.628442	0.629449	0.619224	0.551628	0.388133	0.321626	0.326581	0.267494	0.242499	0.25822	0.121433	0.136261	0.136861	0.136861
601	0.93844	0.920759	0.802215	0.700019	0.67872	0.640695	0.641044	0.630331	0.561772	0.395283	0.328764	0.332739	0.273394	0.248029	0.261783	0.123168	0.137701	0.138238	0.138238
602	0.960782	0.937211	0.814506	0.711735	0.690584	0.652099	0.652373	0.641309	0.571497	0.402414	0.335549	0.338531	0.279204	0.2532	0.265141	0.124795	0.139054	0.139327	0.139327
603	0.981972	0.952921	0.826255	0.722962	0.701487	0.663277	0.662881	0.651436	0.580904	0.409085	0.342361	0.344271	0.28494	0.258535	0.268536	0.126533	0.140377	0.140529	0.140529
604	1.00157	0.967783	0.837624	0.733835	0.71233	0.674055	0.673257	0.661383	0.589779	0.415485	0.348587	0.349739	0.29023	0.263335	0.27198	0.127869	0.141559	0.141638	0.141638
605	1.02035	0.981959	0.848803	0.74421	0.722567	0.68403	0.68322	0.67064	0.59811	0.421516	0.354907	0.354774	0.295656	0.268387	0.275088	0.129541	0.142862	0.142829	0.142829
606	1.03778	0.994781	0.858182	0.753576	0.731927	0.693549	0.692597	0.679353	0.606104	0.427526	0.360587	0.359947	0.300537	0.272934	0.278394	0.131004	0.144	0.143861	0.143861
607	1.0531	1.00569	0.867268	0.762359	0.740575	0.702247	0.700738	0.687691	0.613476	0.432745	0.365973	0.364474	0.305183	0.277183	0.281395	0.132211	0.145155	0.144687	0.144687
608	1.06567	1.01595	0.875137	0.769779	0.748096	0.709543	0.70803	0.6948	0.619597	0.43715	0.370745	0.36854	0.309271	0.280922	0.283645	0.133499	0.146173	0.145565	0.145565
609	1.07642	1.0241	0.881621	0.77661	0.754413	0.715919	0.714468	0.700974	0.624852	0.441459	0.375021	0.372238	0.312961	0.284447	0.285838	0.134704	0.147114	0.146435	0.146435
610	1.08562	1.03066	0.88735	0.781915	0.759844	0.721386	0.719777	0.706149	0.629635	0.445329	0.378517	0.375393	0.316203	0.287355	0.287889	0.135547	0.147923	0.147008	0.147008
611	1.09211	1.03547	0.891804	0.786453	0.764119	0.725661	0.723953	0.710302	0.633425	0.448445	0.38164	0.378114	0.319058	0.289903	0.289536	0.136553	0.148487	0.147501	0.147501
612	1.09664	1.03957	0.895645	0.790122	0.76814	0.729184	0.727976	0.714213	0.636451	0.451169	0.384529	0.380397	0.32143	0.29214	0.291089	0.137362	0.149184	0.147897	0.147897
613	1.09972	1.0424	0.898527	0.793166	0.770894	0.731757	0.730824	0.71702	0.638619	0.453374	0.386731	0.382107	0.323313	0.293978	0.292283	0.137869	0.149583	0.148381	0.148381
614	1.10147	1.04335	0.90068	0.795349	0.773108	0.734081	0.733249	0.719102	0.640028	0.455072	0.388626	0.383769	0.325042	0.295676	0.293184	0.138284	0.150109	0.148695	0.148695
615	1.10273	1.04408	0.902147	0.796997	0.774802	0.735352	0.73501	0.721017	0.641326	0.45642	0.390026	0.385126	0.326357	0.297025	0.294036	0.138738	0.150228	0.148832	0.148832
616	1.10109	1.04427	0.903318	0.797831	0.775978	0.736195	0.736026	0.722297	0.642617	0.457906	0.391347	0.386534	0.327686	0.29813	0.29479	0.139241	0.150572	0.149106	0.149106
617	1.10026	1.04321	0.903714	0.798703	0.776705	0.737021	0.737134	0.723195	0.643319	0.458886	0.392329	0.387475	0.328764	0.299092	0.295304	0.139615	0.150816	0.149213	0.149213
618	1.09826	1.0422	0.903915	0.799414	0.777164	0.737241	0.737581	0.723917	0.643718	0.459765	0.393425	0.388394	0.329719	0.300116	0.295882	0.139807	0.150962	0.149385	0.149385
619	1.0963	1.04047	0.904395	0.7997	0.777689	0.737699	0.737961	0.724804	0.6443	0.460618	0.394225	0.389429	0.330688	0.301079	0.296443	0.140191	0.151093	0.14952	0.14952
620	1.09429	1.03979	0.904586	0.800258	0.778711	0.738184	0.738868	0.725423	0.644829	0.461222	0.395229	0.39025	0.331653	0.301895	0.296651	0.140402	0.151362	0.149534	0.149534
621	1.09285	1.03838	0.904913	0.800448	0.779129	0.738907	0.739512	0.726166	0.645186	0.462081	0.396182	0.391247	0.332803	0.303057	0.296988	0.140824	0.151661	0.149674	0.149674
622	1.09199	1.03756	0.905752	0.801343	0.779824	0.739697	0.740685	0.727332	0.64584	0.463428	0.397476	0.392585	0.333747	0.304174	0.297888	0.141205	0.15199	0.149851	0.149851
623	1.09143	1.03773	0.906992	0.802877	0.781561	0.741084	0.742024	0.728893	0.647186	0.464586	0.39886	0.393899	0.335175	0.305459	0.298582	0.141597	0.152246	0.14983	0.14983
624	1.09271	1.03831	0.909072	0.80488	0.783762	0.74285	0.744095	0.730898	0.648744	0.466307	0.400843	0.395673	0.336826	0.307049	0.299762	0.142051	0.152521	0.150143	0.150143
625	1.09512	1.04048	0.91153	0.807409	0.786188	0.74533	0.746599	0.733508	0.650842	0.468422	0.402881	0.397655	0.338864	0.308772	0.301034	0.142684	0.152954	0.150379	0.150379
626	1.098	1.04281	0.915062	0.810722	0.789597	0.748564	0.750355	0.736666	0.653691	0.470857	0.405437	0.39995	0.341246	0.311143	0.30276	0.143448	0.153533	0.150843	0.150843
627	1.10304	1.04661	0.919222	0.81471	0.793651	0.752652	0.753922	0.740531	0.656733	0.473754	0.408565	0.402553	0.343807	0.313569	0.304467	0.144392	0.154226	0.151272	0.151272
628	1.10914	1.05213	0.924184	0.819136	0.798676	0.757397	0.758526	0.745177	0.660961	0.477229	0.411878	0.405723	0.346854	0.316418	0.30648	0.145328	0.15503	0.151945	0.151945
629	1.11755	1.05833	0.930752	0.824954	0.804273	0.763739	0.764187	0.7506	0.665734	0.4809	0.416214	0.409254	0.350631	0.319801	0.308488	0.146535	0.156136	0.152732	0.152732
630	1.1273	1.06635	0.937953	0.83204	0.8115	0.770403	0.770871	0.756973	0.671444	0.48568	0.42101	0.4131	0.354762	0.323769	0.311162	0.147864	0.157022	0.153453	0.153453
631	1.14013	1.07636	0.94641	0.839609	0.819574	0.778541	0.778712	0.76453	0.677984	0.490818	0.426459	0.41776	0.359366	0.327981	0.314104	0.149434	0.158344	0.154543	0.154543
632	1.15474	1.08719	0.956253	0.848476	0.828549	0.787429	0.787583	0.772929	0.685136	0.49648	0.432415	0.422786	0.364559	0.332869	0.317164	0.151073	0.159593	0.15575	0.15575
633	1.17014	1.09947	0.966689	0.858265	0.838221	0.797291	0.796797	0.782003	0.693088	0.502869	0.438803	0.428558	0.370164	0.337974	0.320723	0.152784	0.16103	0.157081	0.157081
634	1.18751	1.11308	0.977687	0.868348	0.848612	0.808185	0.807301	0.79177	0.701803	0.509561	0.445817	0.434497	0.376263	0.343608	0.324448	0.154801	0.162496	0.158447	0.158447
635	1.2071	1.12793	0.989806	0.879888	0.859484	0.819875	0.818637	0.802144	0.711094	0.516853	0.453289	0.440872	0.382716	0.349525	0.328637	0.156943	0.164349	0.159957	0.159957
636	1.22795	1.14437	1.00319	0.892055	0.87226	0.83208	0.830309	0.813843	0.721231	0.524509	0.461393	0.447529	0.389518	0.355836	0.33281	0.158944	0.166202	0.161416	0.161416
637	1.25038	1.16172	1.01694	0.904947	0.884795	0.845465	0.84252	0.825875	0.732256	0.532633	0.470308	0.454981	0.397062	0.362704	0.337636	0.161396	0.168224	0.163086	0.163086
638	1.27478	1.18098	1.0321	0.919277	0.898864	0.859917	0.855772	0.838994	0.743653	0.541259	0.479224	0.462658	0.404781	0.369861	0.342315	0.163974	0.170464	0.164952	0.164952
639	1.30196	1.20084	1.0487	0.933364	0.913361	0.874938	0.870381	0.852219	0.755678	0.550488	0.488814	0.47107	0.413078	0.377465	0.34733	0.166684	0.172639	0.16692	0.16692
640	1.32912	1.22278	1.06562	0.949249	0.92865	0.890424	0.88543	0.866897	0.76863	0.560205	0.499128	0.479612	0.421827	0.385543	0.352938	0.169518	0.175135	0.169006	0.169006
641	1.35895	1.24566	1.08323	0.965865	0.944791	0.907671	0.901142	0.882163	0.782092	0.570605	0.510128	0.488955	0.431257	0.394246	0.358613	0.172587	0.177788	0.171308	0.171308
642	1.39045	1.27036	1.10227	0.982825	0.962586	0.925698	0.917947	0.897949	0.796773	0.58144	0.521606	0.498649	0.441	0.403274	0.364841	0.17578	0.1805	0.17356	0.17356
643	1.42567	1.29552	1.1209	1.00066	0.979561	0.943868	0.935326	0.914414	0.811301	0.592974	0.533178	0.508757	0.451029	0.412301	0.371253	0.178986	0.183129	0.176025	0.176025
644	1.45933	1.32176	1.14154	1.01876	0.997506	0.962727	0.952956	0.931509	0.82632	0.604269	0.545365	0.518747	0.461205	0.421837	0.37774	0.182456	0.186121	0.178714	0.178714
645	1.49336	1.34742	1.16076	1.03761	1.01541	0.981205	0.970458	0.947941	0.841379	0.615696	0.557231	0.528752	0.471303	0.431143	0.384132	0.185672	0.188964	0.181159	0.181159
646	1.52784	1.3727	1.1808	1.05521	1.03273	0.999489	0.987995	0.964297	0.855803	0.62664	0.569063	0.538579	0.481189	0.440212	0.390389	0.188776	0.191597	0.183583	0.183583
647	1.5631	1.39847	1.20042	1.07285	1.05029	1.01758	1.00567	0.981532	0.870001	0.637484	0.580749	0.548366	0.491394	0.449461	0.396538	0.192242	0.194428	0.186036	0.186036
648	1.59874	1.4261	1.21968	1.09094	1.06755	1.03516	1.02249	0.997268	0.884714	0.648631	0.592453	0.557997	0.501357	0.458568	0.402749	0.195401	0.197177	0.188522	0.188522
649	1.63364	1.45097	1.23806	1.10775	1.08417	1.05302	1.0392	1.01309	0.898118	0.659268	0.603765	0.567523	0.511135	0.467497	0.408831	0.198671	0.199953	0.190899	0.190899
650	1.66944	1.47528	1.25629	1.12423	1.10078	1.06991	1.05559	1.02865	0.91153	0.669883	0.615104	0.577071	0.520602	0.476269	0.414759	0.201619	0.202679	0.19322	0.19322
651	1.70258	1.49941	1.27432	1.14084	1.11674	1.08605	1.07116	1.04422	0.924763	0.679557	0.625934	0.585789	0.530055	0.484904	0.420098	0.204699	0.205205	0.195551	0.195551
652	1.73576	1.52348	1.29003	1.15652	1.13211	1.10269	1.08729	1.05903	0.937775	0.689332	0.636324	0.594727	0.539172	0.49323	0.426132	0.207578	0.207676	0.19785	0.19785
653	1.76784	1.54733	1.30638	1.17287	1.14653	1.11843	1.10193	1.07301	0.950243	0.699561	0.647071	0.603507	0.548102	0.501257	0.431638	0.210519	0.210225	0.20002	0.20002
654	1.80241	1.56848	1.32325	1.18727	1.16079	1.13276	1.11661	1.08661	0.961742	0.708701	0.657056	0.611869	0.556556	0.509278	0.437039	0.213345	0.212571	0.202067	0.202067
655	1.83406	1.59217	1.33829	1.20116	1.17509	1.14668	1.13031	1.09972	0.973446	0.717613	0.666521	0.619892	0.56476	0.516892	0.442111	0.216013	0.214825	0.204191	0.204191
656	1.86533	1.6113	1.35095	1.21486	1.18704	1.15962	1.14347	1.11205	0.983949	0.726213	0.6755	0.627549	0.572485	0.523847	0.446948	0.218526	0.216972	0.206205	0.206205
657	1.89247	1.62853	1.3623	1.22666	1.19959	1.17142	1.15496	1.12344	0.993654	0.734176	0.683914	0.634648	0.5798	0.530364	0.451494	0.220959	0.219015	0.207949	0.207949
658	1.91732	1.64672	1.37295	1.23767	1.21	1.1823	1.16663	1.13324	1.00273	0.741054	0.691528	0.641051	0.586203	0.536413	0.455499	0.222845	0.220695	0.209458	0.209458
659	1.938	1.65948	1.38333	1.24784	1.21914	1.1909	1.17581	1.14186	1.01112	0.747456	0.697974	0.646691	0.59194	0.541567	0.459034	0.224667	0.22226	0.210814	0.210814
660	1.95796	1.67009	1.39065	1.25608	1.22731	1.19814	1.18421	1.1505	1.01755	0.752361	0.703514	0.651585	0.596871	0.545971	0.462066	0.226117	0.223533	0.211986	0.211986
661	1.97095	1.68096	1.39752	1.26307	1.23394	1.20355	1.19026	1.1557	1.0229	0.756593	0.708031	0.655542	0.600699	0.549591	0.464289	0.227293	0.224676	0.212862	0.212862
662	1.98108	1.68762	1.39956	1.26651	1.23771	1.20665	1.1943	1.15965	1.02601	0.759485	0.711281	0.658055	0.60323	0.552063	0.465823	0.228363	0.225515	0.213508	0.213508
663	1.98492	1.68946	1.39984	1.26804	1.23987	1.20776	1.19619	1.16151	1.02768	0.760889	0.712673	0.659489	0.604717	0.553305	0.466574	0.228805	0.225822	0.213836	0.213836
664	1.97792	1.68514	1.39654	1.26809	1.23823	1.20467	1.19564	1.16151	1.02712	0.760793	0.71214	0.659603	0.604346	0.552899	0.466273	0.228389	0.225465	0.213464	0.213464
665	1.96321	1.67835	1.38952	1.26466	1.23463	1.1988	1.19255	1.15744	1.0243	0.758476	0.709742	0.657753	0.602432	0.55115	0.464933	0.227645	0.224933	0.21303	0.21303
666	1.94214	1.66392	1.37903	1.25652	1.22678	1.18886	1.18417	1.15056	1.01792	0.753869	0.70456	0.653593	0.597988	0.547239	0.462051	0.226115	0.223564	0.21178	0.21178
667	1.91018	1.64306	1.36493	1.24477	1.21581	1.17489	1.17305	1.13988	1.0088	0.746791	0.696941	0.647366	0.591572	0.541394	0.457867	0.223759	0.221535	0.209878	0.209878
668	1.86928	1.61577	1.34392	1.22895	1.20122	1.15584	1.15747	1.12545	0.995791	0.737226	0.686061	0.638615	0.582917	0.533176	0.45212	0.220695	0.218766	0.207507	0.207507
669	1.81734	1.58098	1.31997	1.20895	1.18212	1.13224	1.13778	1.10691	0.979559	0.725035	0.672756	0.627753	0.571512	0.522983	0.444586	0.216786	0.215449	0.204607	0.204607
670	1.76151	1.54073	1.2902	1.18522	1.15916	1.10545	1.11454	1.08459	0.960122	0.710324	0.656767	0.614779	0.55823	0.510713	0.435774	0.212226	0.211373	0.200857	0.200857
671	1.69679	1.49548	1.25806	1.15588	1.13158	1.07465	1.08723	1.05885	0.936571	0.692782	0.638259	0.599402	0.542577	0.4963	0.425453	0.206719	0.206652	0.196549	0.196549
672	1.62798	1.4447	1.22066	1.1238	1.10066	1.03873	1.05604	1.02956	0.909986	0.672463	0.617516	0.582185	0.525007	0.480001	0.41392	0.200569	0.201242	0.191809	0.191809
673	1.55584	1.38916	1.17868	1.08875	1.06599	1.0004	1.02202	0.996039	0.880563	0.650448	0.593864	0.563056	0.505263	0.462291	0.401176	0.193834	0.195324	0.186539	0.186539
674	1.47631	1.32862	1.13455	1.0499	1.02832	0.960063	0.983711	0.96056	0.848651	0.626336	0.569118	0.542061	0.48414	0.443051	0.387172	0.186602	0.189024	0.180981	0.180981
675	1.39555	1.26776	1.08733	1.00892	0.9874	0.916021	0.944108	0.922323	0.814062	0.600315	0.542615	0.519426	0.461508	0.422192	0.372105	0.178845	0.182229	0.174728	0.174728
676	1.31454	1.20372	1.03881	0.964985	0.944692	0.869828	0.902159	0.88203	0.777566	0.573379	0.51368	0.495915	0.437112	0.400129	0.356555	0.17045	0.174762	0.168148	0.168148
677	1.23163	1.13772	0.987499	0.918983	0.898907	0.821445	0.858047	0.83945	0.739438	0.545223	0.484116	0.471017	0.412136	0.377162	0.340373	0.161764	0.167217	0.161474	0.161474
678	1.14798	1.07047	0.934772	0.871025	0.852325	0.772925	0.812017	0.795999	0.699295	0.515726	0.454325	0.445932	0.386946	0.353671	0.323553	0.152995	0.159626	0.154744	0.154744
679	1.06507	1.00369	0.88246	0.823712	0.805203	0.724541	0.766017	0.751966	0.658562	0.485569	0.424042	0.42006	0.360881	0.32989	0.306261	0.144317	0.151888	0.147766	0.147766
680	0.98612	0.938105	0.83167	0.776476	0.758064	0.675533	0.721229	0.708225	0.618636	0.456164	0.394019	0.394127	0.335594	0.306743	0.289492	0.135483	0.144234	0.140858	0.140858
681	0.910343	0.874954	0.782001	0.730648	0.712623	0.628555	0.677353	0.665985	0.57996	0.42796	0.364638	0.36954	0.310859	0.283968	0.273289	0.126829	0.136611	0.133973	0.133973
682	0.837649	0.814792	0.734321	0.685995	0.667979	0.585505	0.635389	0.625093	0.542544	0.400408	0.337421	0.346085	0.287516	0.262674	0.257865	0.118798	0.129742	0.127873	0.127873
683	0.769225	0.758422	0.688773	0.644701	0.626796	0.543599	0.595766	0.587022	0.507083	0.374149	0.311429	0.323327	0.265248	0.242526	0.2431	0.111159	0.122938	0.121619	0.121619
684	0.705914	0.70565	0.646791	0.606168	0.587854	0.50373	0.55863	0.550862	0.473208	0.349512	0.286636	0.302011	0.244231	0.223107	0.229123	0.103852	0.116429	0.115814	0.115814
685	0.645789	0.655094	0.606786	0.568776	0.550243	0.466515	0.523127	0.516485	0.441457	0.326612	0.263403	0.281795	0.224444	0.204949	0.216042	0.096893	0.11047	0.110462	0.110462
686	0.588949	0.607847	0.568998	0.533639	0.515001	0.431409	0.489182	0.483779	0.411331	0.304634	0.241642	0.2629	0.205871	0.188193	0.203631	0.09051	0.10475	0.105251	0.105251
687	0.536435	0.563802	0.533786	0.501035	0.482085	0.398204	0.458392	0.453129	0.382467	0.283866	0.221066	0.244881	0.18859	0.172074	0.191629	0.084368	0.099348	0.100273	0.100273
688	0.4883	0.522423	0.501383	0.470117	0.451291	0.367505	0.429005	0.424918	0.356377	0.264347	0.201936	0.228225	0.172066	0.157204	0.18055	0.078632	0.094316	0.095811	0.095811
689	0.44369	0.484289	0.470766	0.441599	0.422359	0.339243	0.401895	0.398489	0.331838	0.246782	0.184448	0.212908	0.157137	0.143358	0.170683	0.073243	0.089645	0.091749	0.091749
690	0.401431	0.448574	0.44214	0.414866	0.39536	0.312919	0.376258	0.37371	0.309037	0.230001	0.168278	0.198562	0.14325	0.130683	0.161231	0.06836	0.08531	0.087728	0.087728
691	0.363153	0.416465	0.416426	0.390823	0.370905	0.288383	0.353448	0.351169	0.287729	0.214565	0.153176	0.185034	0.130471	0.118986	0.152393	0.063879	0.081277	0.083997	0.083997
692	0.329604	0.387449	0.39293	0.368893	0.348799	0.266822	0.332841	0.331039	0.268752	0.200674	0.139438	0.173144	0.118848	0.108342	0.144599	0.059745	0.077631	0.080518	0.080518
693	0.298832	0.361038	0.371638	0.34868	0.328656	0.247406	0.31389	0.312277	0.252038	0.188601	0.127558	0.162672	0.10864	0.099062	0.137518	0.056154	0.074439	0.077622	0.077622
694	0.271037	0.337434	0.352582	0.330916	0.310717	0.229798	0.296785	0.295803	0.23679	0.177579	0.116753	0.153046	0.099376	0.090414	0.131187	0.052835	0.07152	0.074834	0.074834
695	0.246625	0.316204	0.335342	0.315258	0.294903	0.213922	0.281777	0.281304	0.223217	0.167722	0.106888	0.144491	0.090915	0.082847	0.125568	0.049816	0.06876	0.072465	0.072465
696	0.224694	0.297173	0.320271	0.301039	0.280697	0.199912	0.268447	0.268145	0.210716	0.158745	0.098061	0.136643	0.08342	0.076041	0.120388	0.047224	0.066487	0.070272	0.070272
697	0.204405	0.279564	0.306172	0.287904	0.267633	0.187279	0.256154	0.25618	0.199635	0.150601	0.0903	0.129678	0.076595	0.069858	0.115847	0.044739	0.064261	0.068143	0.068143
698	0.186234	0.263768	0.293674	0.276167	0.255846	0.175629	0.244847	0.245365	0.18978	0.143215	0.083123	0.123412	0.070611	0.064322	0.111674	0.042563	0.062397	0.0663	0.0663
699	0.170151	0.250014	0.282602	0.265728	0.245382	0.165022	0.235062	0.235801	0.180409	0.13641	0.076732	0.117594	0.065008	0.059227	0.107706	0.040513	0.060481	0.064564	0.064564
700	0.155598	0.237365	0.272173	0.256015	0.235538	0.155685	0.225934	0.226926	0.172346	0.130449	0.070774	0.112446	0.060085	0.054694	0.104341	0.038771	0.058927	0.063113	0.063113
701	0.14214	0.225625	0.262789	0.247211	0.226681	0.146955	0.217626	0.21888	0.164936	0.125109	0.065541	0.107827	0.055408	0.050524	0.101433	0.036951	0.057251	0.061548	0.061548
702	0.129811	0.21517	0.254177	0.239289	0.218788	0.138942	0.210168	0.211436	0.157956	0.120035	0.060473	0.103457	0.051141	0.046589	0.098501	0.035239	0.055812	0.060105	0.060105
703	0.118916	0.205474	0.246657	0.23236	0.211889	0.131724	0.20375	0.204952	0.151753	0.115497	0.056102	0.099608	0.047395	0.043153	0.095929	0.033732	0.054497	0.058919	0.058919
704	0.109254	0.196953	0.239671	0.225889	0.205447	0.125574	0.197637	0.199023	0.146271	0.111573	0.052476	0.096198	0.044318	0.040299	0.093485	0.032601	0.053443	0.058009	0.058009
705	0.100567	0.189154	0.233502	0.22025	0.199781	0.119718	0.192284	0.193731	0.141535	0.107925	0.048978	0.093082	0.0413	0.037752	0.091436	0.031443	0.052372	0.057054	0.057054
706	0.092563	0.182257	0.227865	0.21531	0.194774	0.114544	0.187442	0.189113	0.137126	0.104621	0.045806	0.09047	0.038652	0.035233	0.089661	0.030437	0.051387	0.056072	0.056072
707	0.08579	0.175859	0.222871	0.210935	0.190117	0.110122	0.183287	0.185163	0.132988	0.101627	0.043118	0.08793	0.036358	0.033231	0.087818	0.029681	0.050631	0.055341	0.055341
708	0.079516	0.170206	0.218481	0.206824	0.185996	0.105985	0.179321	0.181479	0.129608	0.099241	0.040779	0.085833	0.034405	0.031359	0.086393	0.028813	0.04986	0.054573	0.054573
709	0.073799	0.165186	0.214422	0.203167	0.182217	0.102283	0.175788	0.177978	0.126315	0.096839	0.038543	0.083772	0.032386	0.029512	0.084944	0.027992	0.049119	0.053811	0.053811
710	0.068783	0.160527	0.21075	0.200058	0.179001	0.09886	0.172693	0.174981	0.12335	0.09468	0.03655	0.082016	0.030651	0.027906	0.083637	0.027322	0.048435	0.053083	0.053083
711	0.064152	0.156122	0.207346	0.197163	0.175987	0.095806	0.169883	0.172254	0.120639	0.092784	0.034692	0.080373	0.029088	0.026533	0.082428	0.026804	0.047746	0.052458	0.052458
712	0.059976	0.152423	0.204257	0.194306	0.173148	0.092936	0.167303	0.169672	0.118239	0.091018	0.032964	0.078901	0.027642	0.025212	0.081355	0.026177	0.047169	0.051828	0.051828
713	0.055902	0.148652	0.201357	0.191682	0.170536	0.090402	0.16482	0.167143	0.115988	0.089319	0.031517	0.077442	0.026424	0.024105	0.080316	0.025694	0.046726	0.051341	0.051341
714	0.05247	0.145337	0.198903	0.189287	0.168089	0.087997	0.162607	0.165021	0.113798	0.087826	0.030153	0.076244	0.025229	0.023028	0.079412	0.025157	0.046216	0.050885	0.050885
715	0.049197	0.142242	0.19643	0.187226	0.165985	0.085861	0.160592	0.163216	0.111914	0.086509	0.028855	0.075135	0.02417	0.021955	0.07865	0.02466	0.045738	0.050311	0.050311
716	0.046214	0.13936	0.194216	0.185334	0.164053	0.083685	0.158818	0.161577	0.11018	0.085307	0.027747	0.074141	0.023286	0.021126	0.077912	0.024114	0.045273	0.049772	0.049772
717	0.043515	0.136739	0.192075	0.183564	0.162331	0.08179	0.15714	0.160099	0.108591	0.084174	0.026626	0.07314	0.022301	0.020188	0.077103	0.023672	0.044739	0.049324	0.049324
718	0.040963	0.134361	0.190269	0.181917	0.160692	0.080191	0.155656	0.158517	0.107223	0.083201	0.025646	0.072458	0.021522	0.019465	0.076513	0.023403	0.044304	0.049	0.049
719	0.038896	0.132229	0.188506	0.180534	0.159208	0.078683	0.154272	0.157308	0.10589	0.082392	0.024877	0.071702	0.020936	0.018976	0.075934	0.023195	0.044109	0.048714	0.048714
720	0.036773	0.130199	0.187021	0.178995	0.157721	0.077234	0.152831	0.156044	0.104574	0.081537	0.024038	0.070901	0.020096	0.018275	0.075413	0.022762	0.043728	0.048375	0.048375
721	0.034922	0.128263	0.185634	0.177702	0.156651	0.075957	0.151872	0.154953	0.103532	0.080635	0.023401	0.070226	0.019484	0.017691	0.074853	0.022464	0.043437	0.047966	0.047966
722	0.033204	0.126587	0.184232	0.1766	0.155524	0.074727	0.150879	0.153944	0.102477	0.079799	0.022833	0.069649	0.018976	0.01719	0.074393	0.022257	0.043192	0.047683	0.047683
723	0.031353	0.124778	0.182789	0.175439	0.154341	0.073516	0.149807	0.15292	0.101365	0.079237	0.022091	0.06898	0.01839	0.016699	0.073864	0.022105	0.042789	0.047305	0.047305
724	0.02985	0.123137	0.18158	0.174317	0.153242	0.072375	0.148744	0.151948	0.100534	0.078901	0.021543	0.068622	0.017955	0.016298	0.073522	0.021755	0.042543	0.047065	0.047065
725	0.028366	0.121641	0.180377	0.173465	0.152349	0.071513	0.147909	0.151069	0.099693	0.078355	0.021061	0.068136	0.017641	0.01586	0.073166	0.021655	0.042324	0.046829	0.046829
726	0.027018	0.120125	0.179107	0.172549	0.151431	0.070504	0.147027	0.150253	0.09891	0.077784	0.020647	0.067633	0.017266	0.015588	0.072748	0.021487	0.042132	0.0466	0.0466
727	0.025786	0.118872	0.178192	0.171751	0.150663	0.06947	0.146236	0.149591	0.098132	0.077104	0.020033	0.067094	0.016605	0.015045	0.072413	0.021101	0.041725	0.04616	0.04616
728	0.024665	0.117646	0.177307	0.171052	0.149966	0.068632	0.145533	0.148974	0.09742	0.076499	0.019635	0.06673	0.016373	0.014791	0.072045	0.020881	0.041502	0.046048	0.046048
729	0.023396	0.116345	0.176431	0.170271	0.149172	0.067653	0.144706	0.148246	0.09673	0.075862	0.019053	0.06626	0.016052	0.014392	0.071677	0.020601	0.041192	0.04565	0.04565
730	0.022283	0.115185	0.175645	0.169584	0.148458	0.066984	0.144065	0.14758	0.096302	0.075326	0.018757	0.06593	0.015765	0.014277	0.071258	0.020558	0.041127	0.045547	0.045547
731	0.021512	0.114066	0.174731	0.169034	0.147884	0.066333	0.143597	0.147091	0.095691	0.07498	0.018512	0.065644	0.015537	0.014054	0.070933	0.020385	0.040934	0.045352	0.045352
732	0.020504	0.113129	0.173869	0.168297	0.147102	0.065735	0.142903	0.146329	0.094992	0.074543	0.018359	0.065153	0.015288	0.013839	0.07062	0.020329	0.040761	0.045278	0.045278
733	0.01958	0.11207	0.173159	0.167636	0.146632	0.065073	0.142374	0.145827	0.094524	0.074209	0.017931	0.064801	0.014935	0.013539	0.070243	0.020187	0.040634	0.045035	0.045035
734	0.018713	0.111159	0.172427	0.166992	0.145906	0.064318	0.141598	0.145223	0.093947	0.074067	0.017529	0.064725	0.014578	0.013174	0.070155	0.019836	0.040317	0.04465	0.04465
735	0.017979	0.110269	0.171844	0.166515	0.14544	0.063697	0.141236	0.144686	0.093456	0.073815	0.017219	0.064509	0.014407	0.012961	0.070007	0.019709	0.039983	0.044468	0.044468
736	0.017377	0.109371	0.171232	0.166007	0.14495	0.063115	0.140797	0.14422	0.093047	0.07367	0.016912	0.064278	0.01412	0.012809	0.069811	0.019563	0.039873	0.044294	0.044294
737	0.01658	0.108598	0.170546	0.16547	0.14426	0.062597	0.140383	0.143675	0.092667	0.073581	0.016675	0.064073	0.014015	0.012621	0.069713	0.01934	0.039816	0.044056	0.044056
738	0.015802	0.107688	0.16992	0.164804	0.143581	0.06211	0.139887	0.143096	0.092397	0.073327	0.016536	0.063854	0.013734	0.012402	0.069473	0.019259	0.039608	0.043991	0.043991
739	0.015214	0.106843	0.169186	0.164535	0.143296	0.061623	0.139441	0.142776	0.091956	0.072913	0.016293	0.063668	0.013466	0.012264	0.069273	0.01918	0.039469	0.043828	0.043828
740	0.014622	0.105999	0.168744	0.164154	0.142899	0.061271	0.13913	0.142507	0.091493	0.072631	0.016013	0.063488	0.013364	0.012109	0.069046	0.019052	0.039265	0.043691	0.043691
741	0.01418	0.105251	0.168111	0.163821	0.142607	0.060813	0.1388	0.142087	0.090911	0.072275	0.015796	0.063126	0.013078	0.011996	0.068605	0.018784	0.039125	0.043474	0.043474
742	0.013536	0.104592	0.16766	0.163471	0.142221	0.060418	0.138408	0.141826	0.090638	0.072152	0.015693	0.063155	0.012896	0.011873	0.068648	0.01872	0.039151	0.043413	0.043413
743	0.012909	0.104017	0.167118	0.16303	0.141799	0.060249	0.13796	0.141422	0.090209	0.071885	0.01549	0.062843	0.012871	0.011857	0.068414	0.018828	0.039055	0.043457	0.043457
744	0.012399	0.103254	0.166533	0.162607	0.141312	0.059706	0.137589	0.141057	0.089855	0.07152	0.015343	0.062587	0.01267	0.011666	0.06813	0.018539	0.038841	0.043143	0.043143
745	0.011938	0.102607	0.166149	0.1624	0.141058	0.059336	0.137381	0.140721	0.089617	0.071252	0.015094	0.062354	0.012489	0.011448	0.067982	0.01838	0.038651	0.043024	0.043024
746	0.011542	0.102066	0.165673	0.162214	0.140743	0.059047	0.137069	0.140528	0.08935	0.071009	0.015027	0.06222	0.012418	0.011422	0.067751	0.018347	0.038654	0.042934	0.042934
747	0.011012	0.101349	0.165227	0.161652	0.14052	0.058813	0.136833	0.140135	0.088969	0.070728	0.014815	0.061906	0.012284	0.011395	0.067503	0.018247	0.038512	0.04288	0.04288
748	0.010607	0.10093	0.164821	0.161333	0.140079	0.058428	0.13654	0.13986	0.088637	0.070543	0.014682	0.061754	0.012247	0.011186	0.067219	0.01815	0.038359	0.042699	0.042699
749	0.010222	0.100234	0.16444	0.161104	0.1396	0.057966	0.136161	0.139692	0.088119	0.070169	0.014494	0.061317	0.01197	0.011032	0.06682	0.018115	0.038323	0.042596	0.042596
750	0.009737	0.099653	0.164072	0.160879	0.139363	0.057663	0.13583	0.139409	0.08769	0.069773	0.014404	0.061062	0.011925	0.011004	0.066621	0.017922	0.038206	0.042433	0.042433
751	0.009371	0.099144	0.163659	0.160442	0.13902	0.057391	0.135592	0.139195	0.087359	0.069664	0.014198	0.060841	0.011863	0.011057	0.06645	0.017764	0.038172	0.04234	0.04234
752	0.009103	0.098734	0.163382	0.160167	0.13874	0.057159	0.135348	0.13898	0.087132	0.069427	0.014036	0.060733	0.011861	0.010795	0.066251	0.017677	0.037999	0.042109	0.042109
753	0.008828	0.098179	0.16283	0.159878	0.138431	0.057083	0.135167	0.138756	0.08689	0.069303	0.013982	0.06067	0.011844	0.010809	0.066247	0.01756	0.037939	0.042004	0.042004
754	0.008597	0.097681	0.162556	0.159672	0.138235	0.05682	0.134893	0.138592	0.086819	0.069261	0.013834	0.060612	0.011749	0.010717	0.066239	0.017604	0.037922	0.041948	0.041948
755	0.008323	0.097217	0.162197	0.159732	0.138061	0.056621	0.13481	0.138388	0.086456	0.069009	0.013671	0.060323	0.011612	0.010584	0.065874	0.017411	0.037744	0.041828	0.041828
756	0.007818	0.096852	0.161832	0.159212	0.137741	0.056396	0.134412	0.138059	0.086029	0.068589	0.013653	0.060026	0.011589	0.010609	0.065608	0.017305	0.037697	0.041765	0.041765
757	0.007638	0.096283	0.161266	0.159088	0.137596	0.056243	0.134124	0.137832	0.085599	0.068382	0.013489	0.05979	0.011435	0.010562	0.065345	0.017198	0.037516	0.041572	0.041572
758	0.007485	0.095961	0.161075	0.158858	0.137388	0.055928	0.133912	0.137681	0.08533	0.068243	0.01336	0.059602	0.011276	0.010418	0.065137	0.017015	0.037371	0.04147	0.04147
759	0.007141	0.095452	0.160752	0.158672	0.137296	0.055773	0.133747	0.1374	0.085035	0.068035	0.013304	0.059473	0.011298	0.01053	0.064962	0.017056	0.037384	0.041362	0.041362
760	0.006873	0.094938	0.160533	0.158451	0.137061	0.055559	0.133439	0.136922	0.084795	0.067952	0.013242	0.059387	0.011193	0.010447	0.064867	0.01697	0.037431	0.041214	0.041214
761	0.006627	0.094707	0.160255	0.15819	0.136909	0.055476	0.133341	0.136822	0.084664	0.067869	0.013295	0.059283	0.011225	0.010437	0.064605	0.017015	0.037344	0.041353	0.041353
762	0.006354	0.094312	0.159971	0.158021	0.136662	0.055089	0.133156	0.136581	0.084363	0.067661	0.012943	0.059124	0.011082	0.010231	0.064438	0.016897	0.037076	0.041088	0.041088
763	0.006232	0.09399	0.159721	0.158048	0.13655	0.055064	0.133079	0.136393	0.0844	0.067887	0.013093	0.059361	0.011146	0.010437	0.064633	0.016941	0.037238	0.041095	0.041095
764	0.006079	0.093617	0.159467	0.157803	0.13662	0.054846	0.133003	0.1361	0.084193	0.067764	0.012913	0.059253	0.010998	0.010394	0.064565	0.016696	0.03712	0.040976	0.040976
765	0.005949	0.093337	0.15928	0.157746	0.136411	0.054647	0.132877	0.136013	0.083905	0.067496	0.012778	0.059186	0.01102	0.010242	0.064384	0.01664	0.037004	0.04089	0.04089
766	0.005693	0.092992	0.159001	0.157491	0.136088	0.054502	0.13259	0.135696	0.083611	0.067515	0.012699	0.058995	0.010879	0.010255	0.06431	0.0165	0.036932	0.040832	0.040832
767	0.00546	0.092545	0.15876	0.157385	0.135974	0.054259	0.132328	0.135553	0.083314	0.067221	0.012627	0.058936	0.010798	0.010073	0.064136	0.016491	0.036918	0.040789	0.040789
768	0.005232	0.092178	0.158467	0.157186	0.135761	0.053904	0.132242	0.135403	0.083127	0.066978	0.012465	0.058756	0.010636	0.010069	0.063984	0.016324	0.036744	0.04062	0.04062
769	0.005054	0.091802	0.15813	0.157057	0.135732	0.053775	0.132046	0.135232	0.082986	0.066812	0.012418	0.058715	0.010539	0.009956	0.063702	0.016255	0.036654	0.040465	0.040465
770	0.00489	0.09148	0.157859	0.156869	0.135195	0.053732	0.131897	0.135042	0.082608	0.066831	0.012396	0.058699	0.010507	0.009944	0.063354	0.016318	0.036667	0.040521	0.040521
771	0.004731	0.0913	0.157794	0.156785	0.135086	0.053407	0.131741	0.134859	0.082088	0.066659	0.012036	0.058565	0.010199	0.009868	0.06313	0.016176	0.036494	0.040298	0.040298
772	0.004662	0.091094	0.157488	0.156697	0.135038	0.053236	0.131575	0.134749	0.081818	0.066474	0.011998	0.058314	0.010187	0.009676	0.062947	0.016038	0.036334	0.040078	0.040078
773	0.004412	0.09059	0.157116	0.156497	0.134771	0.05308	0.131339	0.134445	0.081548	0.066281	0.012063	0.058249	0.010148	0.009604	0.062792	0.016008	0.036192	0.04009	0.04009
774	0.004514	0.090496	0.157094	0.156541	0.134697	0.053039	0.131366	0.134499	0.081526	0.066167	0.012104	0.05813	0.010133	0.009663	0.062717	0.015918	0.036171	0.040022	0.040022
775	0.004278	0.090023	0.156773	0.156363	0.134529	0.052902	0.131237	0.134346	0.081166	0.065942	0.011894	0.057949	0.010029	0.00951	0.062477	0.015793	0.036052	0.039767	0.039767
776	0.004093	0.089676	0.156312	0.156219	0.134415	0.052722	0.130963	0.134197	0.080733	0.065607	0.011746	0.057581	0.00989	0.009423	0.062279	0.015604	0.035911	0.039671	0.039671
777	0.003949	0.089517	0.156324	0.155993	0.134154	0.052502	0.130823	0.134009	0.080424	0.065361	0.011823	0.05748	0.009865	0.009432	0.061979	0.015552	0.035868	0.039508	0.039508
778	0.004086	0.089409	0.156188	0.155949	0.134117	0.052369	0.130827	0.134009	0.080051	0.065109	0.011741	0.057275	0.009835	0.009394	0.061734	0.015622	0.035882	0.03959	0.03959
779	0.003958	0.089052	0.155967	0.15554	0.133853	0.052283	0.130646	0.133885	0.079996	0.06509	0.01161	0.057233	0.009746	0.009378	0.0617	0.015445	0.035796	0.039418	0.039418
780	0.003913	0.088641	0.155641	0.155466	0.133847	0.052172	0.13064	0.133798	0.079626	0.064852	0.011575	0.057001	0.009778	0.009325	0.061531	0.015427	0.035748	0.039472	0.039472
781	0.003727	0.088384	0.155504	0.155326	0.133513	0.05207	0.130548	0.133614	0.079324	0.064515	0.011727	0.056657	0.009758	0.00926	0.061103	0.015347	0.035747	0.039491	0.039491
782	0.003666	0.088083	0.155429	0.155219	0.133153	0.051861	0.130523	0.133479	0.079301	0.064539	0.01163	0.056714	0.00982	0.009435	0.061134	0.015346	0.035731	0.039513	0.039513
783	0.003299	0.087878	0.155072	0.155112	0.132866	0.051923	0.130087	0.133052	0.079038	0.064377	0.011591	0.056713	0.009764	0.009328	0.061078	0.015368	0.035601	0.039459	0.039459
784	0.003338	0.087563	0.154792	0.155154	0.132673	0.051585	0.129985	0.132922	0.078803	0.064191	0.011389	0.056676	0.009449	0.009074	0.060966	0.015192	0.035424	0.039039	0.039039
785	0.003236	0.087313	0.154595	0.155101	0.132641	0.05163	0.1299	0.132857	0.078549	0.063705	0.011339	0.056528	0.009625	0.009337	0.060859	0.015163	0.035518	0.039129	0.039129
786	0.003093	0.087227	0.154512	0.154847	0.132516	0.051384	0.129798	0.13277	0.078514	0.063475	0.011284	0.056445	0.009488	0.009066	0.060789	0.01514	0.035385	0.038967	0.038967
787	0.003067	0.086987	0.15462	0.154836	0.132523	0.051447	0.129832	0.132856	0.078246	0.063405	0.011342	0.056311	0.009621	0.00929	0.0606	0.015136	0.035399	0.038978	0.038978
788	0.003182	0.086628	0.154244	0.154727	0.132361	0.051118	0.129782	0.132839	0.078094	0.063354	0.011139	0.056198	0.009393	0.009003	0.060455	0.01488	0.03529	0.038881	0.038881
789	0.003048	0.086241	0.154305	0.154738	0.132344	0.051126	0.129696	0.132709	0.078328	0.063709	0.011089	0.056181	0.009445	0.009098	0.060484	0.014913	0.035303	0.038893	0.038893
790	0.003146	0.085909	0.153951	0.154823	0.132309	0.051002	0.12968	0.13259	0.0781	0.063506	0.011146	0.055947	0.009344	0.00895	0.060188	0.014947	0.035164	0.038684	0.038684
791	0.003004	0.08567	0.153734	0.154716	0.132184	0.050851	0.129577	0.132601	0.077811	0.063247	0.011	0.055594	0.009242	0.008875	0.060035	0.014907	0.035131	0.038682	0.038682
792	0.00296	0.085449	0.153598	0.154613	0.131972	0.050784	0.129456	0.132475	0.077716	0.063217	0.010995	0.055576	0.009433	0.00896	0.060051	0.014778	0.035071	0.038609	0.038609
793	0.002945	0.085377	0.153546	0.15463	0.131928	0.050651	0.129121	0.132315	0.077417	0.063064	0.010928	0.055398	0.009274	0.008927	0.059811	0.014703	0.035051	0.038545	0.038545
794	0.002888	0.085111	0.153235	0.154375	0.13181	0.050542	0.128833	0.132231	0.077277	0.062927	0.010817	0.055392	0.009245	0.008832	0.059511	0.014653	0.034898	0.038368	0.038368
795	0.002717	0.085018	0.153067	0.154185	0.131594	0.050285	0.128733	0.13201	0.077207	0.062888	0.010704	0.055361	0.009163	0.00866	0.059544	0.014638	0.034635	0.038257	0.038257
796	0.00263	0.084755	0.153014	0.154188	0.13142	0.050397	0.128728	0.131777	0.076836	0.062806	0.010838	0.055335	0.009114	0.008695	0.059417	0.014611	0.034745	0.038346	0.038346
797	0.002526	0.084354	0.152825	0.154023	0.131222	0.050241	0.128646	0.131704	0.076714	0.062654	0.010718	0.05518	0.009144	0.008697	0.059329	0.014432	0.034652	0.038129	0.038129
798	0.002629	0.084216	0.152656	0.153867	0.131094	0.049985	0.128486	0.131531	0.076548	0.062526	0.010596	0.055112	0.008943	0.008645	0.059383	0.014376	0.034505	0.03799	0.03799
799	0.002504	0.084032	0.15238	0.153767	0.130993	0.049981	0.128457	0.131441	0.076586	0.062387	0.010614	0.055066	0.008985	0.008629	0.059505	0.014297	0.034496	0.037939	0.037939
800	0.002521	0.083989	0.152367	0.153633	0.130985	0.049907	0.128488	0.131524	0.076333	0.062346	0.010705	0.054951	0.009096	0.008696	0.059439	0.014334	0.034572	0.038026	0.038026

## Sheet: MB dye AgNPs
Mb dye removal by AgNPs
W.nm	0min	10min	20min	30min	40min	50min	60min	70min	80min	90min	100min	110min	120min	130min	140min	150min	160min	170min	180min
300	3.39474	0.772167	0.755914	0.751838	0.751583	0.751073	0.742971	0.733574	0.737263	0.717601	0.741105	0.726608	0.711689	0.70851	0.706783	0.711353	0.83441	0.83763	0.737274
301	1.48638	0.716123	0.704633	0.700506	0.7008	0.701286	0.695506	0.686057	0.690273	0.670276	0.694047	0.681059	0.667668	0.664826	0.66363	0.668558	0.796467	0.798266	0.691949
302	0.990041	0.662931	0.655405	0.651773	0.653114	0.654578	0.651111	0.640887	0.645504	0.625163	0.650468	0.637821	0.625421	0.622752	0.621415	0.627258	0.75821	0.760617	0.649166
303	0.783536	0.612929	0.608703	0.606245	0.60857	0.609569	0.607889	0.597796	0.602858	0.582968	0.608595	0.597276	0.584828	0.582285	0.581137	0.586787	0.722197	0.723914	0.607362
304	0.653343	0.565762	0.56482	0.563501	0.565515	0.567335	0.566135	0.556307	0.561483	0.542439	0.568421	0.557701	0.545361	0.542488	0.542864	0.547662	0.687139	0.688663	0.566913
305	0.562023	0.520356	0.523456	0.522602	0.52504	0.526929	0.527097	0.516904	0.522176	0.503588	0.529258	0.519853	0.508413	0.505751	0.506447	0.510906	0.654654	0.655905	0.529032
306	0.489966	0.478919	0.484091	0.485191	0.487245	0.489843	0.490608	0.480941	0.486729	0.4683	0.494117	0.484947	0.474086	0.471378	0.472383	0.476816	0.623709	0.625477	0.493959
307	0.434697	0.442716	0.450118	0.451933	0.453864	0.456832	0.458842	0.448961	0.455422	0.436614	0.462526	0.453615	0.443672	0.440425	0.442153	0.446236	0.595898	0.597364	0.463192
308	0.392597	0.412687	0.422355	0.424102	0.426433	0.429538	0.43102	0.422474	0.428323	0.410036	0.435161	0.427543	0.418136	0.415208	0.416523	0.420893	0.573748	0.574715	0.43676
309	0.359476	0.387143	0.398744	0.401046	0.403479	0.406325	0.408109	0.39987	0.405643	0.387795	0.41286	0.405812	0.396759	0.393771	0.395924	0.399807	0.555154	0.555831	0.414764
310	0.334114	0.366826	0.379578	0.382051	0.384628	0.3877	0.390138	0.38178	0.387505	0.370308	0.395069	0.388083	0.379851	0.376646	0.379308	0.382447	0.539271	0.540384	0.39712
311	0.31355	0.350153	0.364672	0.367159	0.37006	0.373136	0.375849	0.367777	0.372559	0.356459	0.380875	0.374217	0.365882	0.362605	0.365388	0.368946	0.527476	0.527736	0.383071
312	0.297775	0.337378	0.352497	0.355104	0.358508	0.361506	0.363959	0.355713	0.36074	0.345069	0.369021	0.362823	0.354381	0.351319	0.353882	0.357446	0.517311	0.51728	0.371126
313	0.285111	0.326536	0.34259	0.345251	0.348714	0.351406	0.354406	0.345967	0.351034	0.335531	0.360002	0.353121	0.345174	0.341968	0.344985	0.348293	0.509122	0.508956	0.361607
314	0.274797	0.31793	0.334559	0.337366	0.341286	0.343421	0.346498	0.33853	0.343482	0.327938	0.35302	0.345684	0.337798	0.334361	0.337478	0.340532	0.502702	0.502854	0.354156
315	0.266621	0.310241	0.327414	0.330022	0.334179	0.336253	0.339115	0.331345	0.336273	0.321223	0.345611	0.338594	0.330922	0.327163	0.330607	0.333249	0.496858	0.496863	0.347091
316	0.259125	0.303505	0.321189	0.323868	0.327928	0.329945	0.332782	0.3251	0.330247	0.315395	0.339546	0.332235	0.324654	0.320804	0.324801	0.32752	0.491919	0.491803	0.341087
317	0.252157	0.297302	0.315205	0.31809	0.321917	0.324256	0.326984	0.319562	0.32438	0.309632	0.333973	0.326231	0.319277	0.315507	0.319514	0.321975	0.487094	0.48684	0.335142
318	0.246454	0.291768	0.309955	0.312883	0.316458	0.319033	0.322006	0.314455	0.319445	0.304472	0.328585	0.321128	0.314061	0.310522	0.314368	0.316803	0.48256	0.482365	0.329932
319	0.241697	0.286563	0.304997	0.30802	0.311633	0.313985	0.316967	0.309634	0.314317	0.299829	0.323266	0.316265	0.309223	0.305474	0.30945	0.311973	0.477874	0.478065	0.324971
320	0.237068	0.282315	0.301042	0.303975	0.307446	0.309985	0.312716	0.305568	0.309936	0.296236	0.319276	0.312077	0.305126	0.301297	0.305284	0.307806	0.4746	0.474633	0.320686
321	0.233468	0.278116	0.297168	0.300106	0.303767	0.306185	0.309181	0.301454	0.306204	0.292408	0.315281	0.308247	0.301494	0.297615	0.301691	0.304536	0.471439	0.471447	0.316753
322	0.229658	0.275097	0.293919	0.297058	0.300701	0.302997	0.306102	0.298405	0.303152	0.289143	0.312208	0.305574	0.298299	0.294788	0.298864	0.301335	0.468717	0.468507	0.31363
323	0.226915	0.271784	0.290817	0.294026	0.297778	0.29998	0.303052	0.295363	0.299918	0.286048	0.308761	0.30235	0.295361	0.291641	0.295924	0.298172	0.465964	0.465843	0.310422
324	0.223502	0.268597	0.287834	0.290923	0.294575	0.296921	0.299853	0.292343	0.296754	0.283194	0.305802	0.29897	0.292337	0.288586	0.292958	0.295742	0.463566	0.463223	0.307368
325	0.220199	0.265434	0.284582	0.287787	0.291282	0.29362	0.296486	0.289176	0.293621	0.280112	0.302285	0.296236	0.289448	0.285687	0.289927	0.293357	0.461267	0.460132	0.303886
326	0.216161	0.261365	0.281023	0.284383	0.287909	0.29004	0.292901	0.285552	0.290109	0.276659	0.299007	0.292776	0.285938	0.282214	0.286746	0.289794	0.458941	0.457107	0.300293
327	0.211757	0.256945	0.276412	0.279643	0.283372	0.28573	0.288304	0.281201	0.285524	0.272698	0.294447	0.288172	0.281987	0.277909	0.282219	0.285589	0.454349	0.453246	0.295727
328	0.206313	0.25119	0.271627	0.274592	0.278175	0.280644	0.283648	0.276426	0.280787	0.267911	0.289713	0.283256	0.277176	0.273035	0.277651	0.280677	0.450023	0.448676	0.290895
329	0.199317	0.244251	0.265106	0.26833	0.272181	0.274579	0.277665	0.270572	0.27476	0.262002	0.283818	0.27748	0.271851	0.26765	0.272373	0.274917	0.444893	0.443239	0.285165
330	0.192694	0.237648	0.258784	0.262174	0.266199	0.268472	0.271666	0.26487	0.26881	0.256455	0.278026	0.271714	0.266268	0.262169	0.266501	0.268657	0.439529	0.437542	0.279446
331	0.189353	0.234182	0.255563	0.258748	0.262858	0.265013	0.268604	0.261374	0.265644	0.253388	0.275061	0.268832	0.263197	0.258963	0.263187	0.265411	0.436783	0.434548	0.276336
332	0.169529	0.214491	0.237031	0.24082	0.245222	0.247534	0.251324	0.243181	0.248251	0.236252	0.257778	0.251917	0.245947	0.242544	0.247393	0.248836	0.420996	0.418907	0.259558
333	0.15817	0.203086	0.226912	0.230634	0.235007	0.237734	0.241482	0.233666	0.238633	0.226697	0.248293	0.242722	0.23685	0.233288	0.238367	0.239728	0.412327	0.41062	0.250327
334	0.147265	0.192063	0.216862	0.220712	0.225193	0.227765	0.232027	0.224036	0.229349	0.217411	0.238656	0.233696	0.227932	0.224014	0.22911	0.230918	0.403381	0.401769	0.241282
335	0.136262	0.181113	0.206678	0.210749	0.215642	0.217622	0.222584	0.214664	0.219879	0.208318	0.228964	0.224467	0.218634	0.214926	0.220228	0.22208	0.394109	0.392591	0.231832
336	0.12569	0.170764	0.197316	0.201312	0.205882	0.20853	0.213224	0.205344	0.210787	0.199389	0.220112	0.215733	0.210319	0.206396	0.211873	0.213753	0.385282	0.383287	0.223346
337	0.116818	0.161283	0.188806	0.192847	0.197797	0.199949	0.205231	0.197237	0.202522	0.191231	0.212095	0.208044	0.202722	0.199031	0.204075	0.206119	0.377621	0.376153	0.215353
338	0.109323	0.153799	0.182099	0.186347	0.191099	0.193425	0.198946	0.191116	0.196413	0.185364	0.20593	0.202195	0.196712	0.193078	0.197949	0.200293	0.371628	0.36995	0.209257
339	0.105876	0.150348	0.17896	0.183445	0.188151	0.1894	0.195946	0.188189	0.193765	0.182609	0.202935	0.19937	0.19402	0.190145	0.195467	0.197191	0.368859	0.367179	0.206421
340	0.096541	0.135203	0.164765	0.171431	0.17514	0.177102	0.182528	0.178496	0.182363	0.170385	0.190499	0.186194	0.180596	0.178966	0.183449	0.183573	0.345858	0.348624	0.194523
341	0.08853	0.127838	0.158062	0.164841	0.16815	0.170268	0.176177	0.172061	0.175715	0.163639	0.18431	0.180166	0.174649	0.172897	0.178184	0.178058	0.341318	0.343286	0.188595
342	0.081063	0.120862	0.151561	0.158418	0.162341	0.164587	0.170598	0.166411	0.170524	0.158205	0.17836	0.175046	0.169301	0.16792	0.172691	0.172818	0.338002	0.338591	0.183384
343	0.075262	0.115412	0.146372	0.153376	0.157425	0.159573	0.166462	0.161548	0.165867	0.15334	0.173635	0.170774	0.165196	0.163778	0.168211	0.168648	0.337227	0.335021	0.178501
344	0.070105	0.110002	0.141727	0.148311	0.152568	0.15484	0.162021	0.157122	0.16134	0.149068	0.169288	0.166369	0.161232	0.159919	0.163993	0.164271	0.33386	0.331591	0.17466
345	0.065704	0.105577	0.137899	0.144392	0.149007	0.150902	0.158541	0.153272	0.158174	0.145443	0.165985	0.163297	0.15808	0.15653	0.160792	0.1611	0.331407	0.329031	0.171175
346	0.061255	0.102098	0.134627	0.141398	0.145764	0.147735	0.15596	0.149962	0.155188	0.142989	0.162918	0.160683	0.155417	0.153401	0.158477	0.158685	0.32907	0.327486	0.168062
347	0.058045	0.100164	0.133353	0.140041	0.144252	0.146529	0.154268	0.148616	0.154074	0.141914	0.161476	0.159605	0.154449	0.152437	0.157616	0.157816	0.328702	0.327086	0.166782
348	0.054585	0.096737	0.129824	0.13656	0.140867	0.143256	0.150937	0.145507	0.150952	0.139041	0.15709	0.156552	0.151522	0.149671	0.154507	0.155248	0.327201	0.324896	0.16406
349	0.051305	0.093848	0.127139	0.133724	0.13821	0.140952	0.149095	0.143042	0.148195	0.136512	0.154425	0.154708	0.149572	0.147686	0.152793	0.152964	0.325111	0.323058	0.162031
350	0.048671	0.090926	0.125014	0.13101	0.135919	0.138385	0.146611	0.140505	0.146221	0.133762	0.151821	0.151913	0.146982	0.145553	0.150357	0.150476	0.323831	0.321668	0.159772
351	0.046006	0.088077	0.122526	0.128487	0.133525	0.135952	0.144182	0.138238	0.143453	0.131711	0.149366	0.149582	0.144553	0.143257	0.147804	0.148735	0.322057	0.31974	0.157307
352	0.044004	0.085572	0.120667	0.126497	0.131468	0.134371	0.142237	0.136385	0.141444	0.12977	0.147429	0.147388	0.142779	0.141178	0.146319	0.147353	0.320723	0.318638	0.15492
353	0.042119	0.083051	0.118209	0.124435	0.129184	0.131967	0.14023	0.134291	0.139548	0.127324	0.145597	0.145418	0.140997	0.13927	0.144056	0.146716	0.319329	0.317535	0.153308
354	0.040932	0.080271	0.115923	0.122149	0.127144	0.129546	0.138206	0.132357	0.137306	0.125258	0.143585	0.143503	0.138798	0.137555	0.142249	0.146062	0.317513	0.31578	0.151137
355	0.038947	0.078261	0.113857	0.120274	0.125265	0.12767	0.136603	0.130449	0.135492	0.123642	0.141814	0.141666	0.136927	0.135798	0.140629	0.144522	0.316329	0.314586	0.149335
356	0.037138	0.075832	0.111956	0.117956	0.123115	0.125639	0.13459	0.12817	0.133424	0.122352	0.140217	0.139645	0.13526	0.134578	0.138722	0.142719	0.314686	0.313508	0.147721
357	0.035596	0.074187	0.110211	0.116368	0.121164	0.124348	0.132739	0.126551	0.132061	0.121971	0.138651	0.137625	0.133584	0.132726	0.137372	0.141103	0.312953	0.312466	0.146209
358	0.033871	0.07227	0.1086	0.114654	0.119519	0.122514	0.131532	0.12521	0.130505	0.120528	0.137575	0.134859	0.131931	0.131384	0.136204	0.140154	0.310973	0.311951	0.14478
359	0.032684	0.070358	0.106917	0.112472	0.117601	0.12089	0.13058	0.123657	0.1291	0.118927	0.137451	0.13313	0.130467	0.130013	0.134858	0.138362	0.310319	0.310438	0.142719
360	0.032478	0.069162	0.105489	0.110055	0.116936	0.119605	0.13069	0.122747	0.128154	0.117764	0.136415	0.13295	0.129693	0.129121	0.133866	0.137282	0.30964	0.309923	0.141773
361	0.031623	0.067972	0.104647	0.109187	0.117552	0.118865	0.129847	0.121701	0.127587	0.117093	0.135204	0.133361	0.128997	0.128538	0.133109	0.136943	0.309629	0.310084	0.141382
362	0.03042	0.066701	0.103828	0.108524	0.117409	0.118031	0.128902	0.121005	0.126657	0.116332	0.132976	0.133126	0.127838	0.127673	0.132239	0.136128	0.308916	0.309489	0.140382
363	0.029876	0.065539	0.102779	0.107316	0.116384	0.117092	0.128045	0.120103	0.125841	0.115476	0.131658	0.132131	0.125539	0.127148	0.131576	0.135417	0.308471	0.309043	0.139296
364	0.029436	0.064361	0.101743	0.106253	0.115381	0.116234	0.127278	0.119137	0.124876	0.114904	0.130937	0.131289	0.124694	0.126495	0.130703	0.134594	0.308036	0.308467	0.138205
365	0.028717	0.063659	0.101179	0.105955	0.114678	0.115733	0.12671	0.119037	0.124197	0.114539	0.130729	0.130545	0.124385	0.125822	0.130195	0.134362	0.307989	0.307836	0.137728
366	0.028487	0.062419	0.10102	0.104786	0.11367	0.115701	0.126288	0.118399	0.123385	0.113268	0.129908	0.13002	0.124877	0.125215	0.129475	0.133783	0.307816	0.307608	0.136849
367	0.028591	0.062236	0.102097	0.10481	0.113958	0.116929	0.126361	0.118594	0.123444	0.113509	0.129725	0.129769	0.125841	0.125199	0.129649	0.133812	0.308114	0.307558	0.136646
368	0.028311	0.061765	0.101653	0.104628	0.113957	0.11665	0.12601	0.11788	0.123392	0.113344	0.129725	0.129372	0.125486	0.125314	0.129549	0.133603	0.307369	0.307196	0.136509
369	0.028163	0.061179	0.1013	0.104401	0.113764	0.116293	0.126017	0.11699	0.122976	0.113299	0.129007	0.129227	0.125312	0.124941	0.128752	0.133379	0.307286	0.306504	0.136304
370	0.028545	0.061127	0.101293	0.104353	0.113641	0.116512	0.12607	0.115502	0.123389	0.113069	0.129179	0.129103	0.125265	0.125023	0.128872	0.133171	0.30744	0.305742	0.136357
371	0.025073	0.059584	0.098407	0.103477	0.109943	0.112121	0.121758	0.112874	0.119518	0.107629	0.126487	0.125524	0.122074	0.121666	0.124747	0.127734	0.310694	0.308105	0.133064
372	0.02507	0.059214	0.098275	0.103242	0.109632	0.112005	0.121482	0.112491	0.119231	0.10731	0.127012	0.125028	0.121741	0.121341	0.124505	0.12766	0.312045	0.307502	0.132628
373	0.025089	0.058823	0.097709	0.102556	0.109149	0.111601	0.120927	0.112253	0.118861	0.106819	0.126329	0.124412	0.121296	0.120885	0.124379	0.127337	0.313169	0.307513	0.132241
374	0.025263	0.058622	0.097576	0.102569	0.108912	0.111428	0.120954	0.111903	0.118588	0.106619	0.126287	0.124272	0.121225	0.1207	0.124095	0.126983	0.313303	0.307799	0.131875
375	0.025211	0.058583	0.09776	0.102552	0.109208	0.111464	0.120948	0.112137	0.118801	0.106667	0.12625	0.124363	0.121449	0.120859	0.123996	0.127225	0.313827	0.308602	0.131796
376	0.025442	0.058487	0.097651	0.102483	0.109208	0.111618	0.120901	0.112006	0.118752	0.106961	0.126062	0.124408	0.121351	0.120898	0.124163	0.126998	0.31443	0.309124	0.131615
377	0.025414	0.057954	0.097197	0.101877	0.108617	0.111109	0.120516	0.111806	0.118134	0.106588	0.125819	0.124026	0.12088	0.120722	0.123839	0.126944	0.314958	0.309293	0.13114
378	0.025767	0.058226	0.097389	0.101909	0.108572	0.111238	0.120595	0.111849	0.11837	0.106793	0.125715	0.124073	0.120807	0.120998	0.124115	0.127205	0.315337	0.31004	0.131089
379	0.025872	0.058197	0.097573	0.102058	0.108695	0.111214	0.120542	0.111861	0.118411	0.10676	0.125858	0.124215	0.120401	0.121139	0.123891	0.127363	0.315067	0.310745	0.131446
380	0.026213	0.058276	0.097409	0.101989	0.108204	0.11122	0.120527	0.111838	0.118304	0.106569	0.12542	0.123986	0.119699	0.121443	0.123887	0.127167	0.315404	0.312235	0.131312
381	0.026209	0.058191	0.097647	0.101782	0.107623	0.111045	0.120359	0.111735	0.118254	0.106532	0.125377	0.123929	0.119627	0.121433	0.123932	0.127272	0.315963	0.312879	0.131144
382	0.026678	0.058362	0.097798	0.101804	0.107515	0.111182	0.120465	0.111704	0.118309	0.106789	0.12565	0.123906	0.120062	0.121433	0.123986	0.127473	0.316569	0.313496	0.131239
383	0.026895	0.058476	0.097929	0.101811	0.107555	0.1114	0.120341	0.111573	0.118376	0.10697	0.12577	0.124145	0.1202	0.121656	0.124225	0.127537	0.317427	0.313777	0.131327
384	0.027358	0.058454	0.097998	0.101812	0.10754	0.111359	0.120277	0.111657	0.118369	0.107283	0.125591	0.123992	0.12039	0.121619	0.124112	0.127361	0.317601	0.313568	0.13126
385	0.027593	0.058529	0.098132	0.101905	0.107658	0.111585	0.120386	0.11166	0.118557	0.107505	0.125697	0.123981	0.120573	0.121813	0.124252	0.127716	0.317817	0.313598	0.131272
386	0.028384	0.059698	0.098522	0.101556	0.108146	0.111851	0.120802	0.112336	0.118758	0.108141	0.126513	0.124426	0.122307	0.122302	0.124921	0.128153	0.318977	0.314957	0.131478
387	0.028699	0.059835	0.098747	0.101883	0.108257	0.112059	0.120663	0.1127	0.118872	0.108292	0.126534	0.124739	0.122387	0.122429	0.125158	0.128523	0.319392	0.315416	0.131265
388	0.029141	0.059972	0.099025	0.102538	0.108421	0.112113	0.121064	0.113004	0.119093	0.108257	0.12676	0.124913	0.122652	0.122781	0.125484	0.128745	0.320142	0.315868	0.131619
389	0.029512	0.060392	0.099301	0.10272	0.108722	0.112302	0.121151	0.113192	0.119522	0.108519	0.126916	0.125081	0.122775	0.123042	0.125695	0.128857	0.320828	0.316591	0.131953
390	0.029692	0.060342	0.099436	0.1029	0.10908	0.112585	0.12117	0.113281	0.119466	0.108415	0.126947	0.125345	0.122395	0.123268	0.125972	0.12925	0.321455	0.317295	0.131918
391	0.029999	0.06017	0.099246	0.102608	0.108873	0.112387	0.121043	0.113095	0.119403	0.108439	0.126612	0.124956	0.122151	0.123093	0.126025	0.129075	0.321753	0.31755	0.131638
392	0.030396	0.059886	0.099215	0.102591	0.108793	0.11241	0.120935	0.113134	0.119486	0.108533	0.126842	0.124998	0.122089	0.12313	0.125956	0.12911	0.3224	0.31777	0.131656
393	0.030337	0.059713	0.099076	0.102436	0.108675	0.11204	0.120893	0.112864	0.119144	0.10811	0.126436	0.124824	0.122157	0.123092	0.125912	0.128764	0.322371	0.317868	0.13145
394	0.030484	0.059424	0.099029	0.102396	0.108369	0.111641	0.120495	0.112635	0.119005	0.107967	0.126251	0.124631	0.122005	0.122874	0.125736	0.128692	0.322801	0.31833	0.131077
395	0.030303	0.05898	0.098522	0.101992	0.107896	0.111323	0.120038	0.112168	0.118629	0.107691	0.125941	0.12421	0.121709	0.122547	0.125256	0.12841	0.32271	0.318175	0.130676
396	0.029735	0.058373	0.098131	0.101547	0.107562	0.110964	0.11962	0.111947	0.118264	0.107199	0.125598	0.123992	0.121936	0.122309	0.12496	0.12811	0.322799	0.317977	0.130163
397	0.02902	0.057633	0.097453	0.10075	0.10696	0.110088	0.118892	0.111217	0.11726	0.106605	0.124915	0.123093	0.121382	0.121583	0.124469	0.1276	0.322628	0.317897	0.129385
398	0.028349	0.056716	0.096635	0.09988	0.105899	0.109312	0.118039	0.110287	0.116594	0.105723	0.123967	0.12206	0.120566	0.120658	0.123763	0.126837	0.322166	0.317497	0.128718
399	0.027595	0.055616	0.095698	0.099013	0.105025	0.1085	0.117144	0.109585	0.11577	0.104791	0.12326	0.121288	0.11961	0.119915	0.122918	0.126008	0.32187	0.317641	0.127816
400	0.026708	0.05453	0.094696	0.098029	0.104125	0.107589	0.116202	0.108662	0.114873	0.10388	0.122296	0.120231	0.118926	0.119098	0.122144	0.124989	0.321422	0.316941	0.12663
401	0.025463	0.05306	0.09316	0.096552	0.10276	0.106256	0.114985	0.107351	0.113441	0.102547	0.120885	0.118847	0.117544	0.117762	0.120805	0.123661	0.320762	0.31589	0.125302
402	0.024323	0.051794	0.092132	0.095344	0.101676	0.105091	0.113714	0.106418	0.112542	0.101449	0.119938	0.117874	0.116652	0.116714	0.119899	0.122798	0.320162	0.315101	0.124208
403	0.023078	0.050349	0.090838	0.094214	0.100442	0.103795	0.112455	0.104923	0.111112	0.100119	0.11859	0.116549	0.115413	0.115665	0.118772	0.12174	0.319113	0.313979	0.122973
404	0.021663	0.048763	0.089502	0.092813	0.099166	0.102558	0.111251	0.103573	0.109931	0.098956	0.117354	0.115456	0.114159	0.114335	0.117541	0.120664	0.31859	0.312773	0.12154
405	0.020458	0.047519	0.088128	0.091619	0.098018	0.10112	0.110085	0.102212	0.108797	0.097793	0.116129	0.114125	0.113081	0.113196	0.116239	0.119373	0.317551	0.31189	0.120364
406	0.019485	0.046025	0.086874	0.09046	0.096615	0.099494	0.108805	0.101033	0.107405	0.096502	0.114807	0.113084	0.111689	0.112075	0.115155	0.118173	0.316867	0.31123	0.118972
407	0.018284	0.044785	0.085749	0.089162	0.095598	0.098405	0.107757	0.099924	0.106374	0.095392	0.11379	0.111965	0.110705	0.110939	0.114175	0.117214	0.316268	0.31046	0.11798
408	0.017367	0.043464	0.084626	0.088211	0.094475	0.097226	0.106787	0.098871	0.105166	0.094249	0.112769	0.11088	0.109681	0.109994	0.113071	0.116317	0.315552	0.310148	0.116876
409	0.016346	0.042428	0.083808	0.087391	0.093671	0.096422	0.105869	0.098105	0.104269	0.093363	0.111955	0.11009	0.108839	0.109141	0.112345	0.115371	0.314548	0.309584	0.116097
410	0.015597	0.041365	0.082931	0.086393	0.092747	0.095402	0.105008	0.097301	0.103455	0.092444	0.110982	0.109216	0.108095	0.108355	0.111555	0.114568	0.313942	0.30899	0.115144
411	0.014823	0.040706	0.082191	0.085697	0.092172	0.09506	0.104457	0.097074	0.102885	0.091791	0.110374	0.108668	0.107522	0.107767	0.110867	0.113989	0.313536	0.308689	0.114589
412	0.014254	0.039984	0.081677	0.085213	0.091589	0.094619	0.10387	0.096521	0.102509	0.091325	0.109856	0.10822	0.107013	0.107291	0.110275	0.113511	0.313628	0.308425	0.114207
413	0.013749	0.039391	0.080962	0.084318	0.091013	0.094341	0.103183	0.095891	0.101753	0.09073	0.109222	0.107568	0.106416	0.106717	0.109653	0.11288	0.313413	0.308389	0.113362
414	0.013458	0.038573	0.080573	0.083934	0.090553	0.09373	0.102758	0.095277	0.101278	0.090311	0.10868	0.10706	0.105884	0.106333	0.109186	0.112461	0.313318	0.308265	0.112969
415	0.013255	0.03809	0.080097	0.083528	0.090232	0.093546	0.10236	0.094948	0.100981	0.08998	0.108377	0.106719	0.10557	0.106048	0.108913	0.112045	0.313198	0.307817	0.112654
416	0.013094	0.037424	0.079852	0.083234	0.089888	0.093439	0.102247	0.094585	0.100639	0.089577	0.108035	0.106386	0.105361	0.105729	0.10833	0.111809	0.313048	0.307886	0.11236
417	0.012981	0.037235	0.079624	0.082983	0.0896	0.093119	0.101959	0.094546	0.100402	0.089382	0.107956	0.106168	0.105321	0.105559	0.10829	0.111727	0.313064	0.307903	0.112131
418	0.012996	0.03713	0.079589	0.082947	0.089589	0.09313	0.102019	0.094532	0.100427	0.089478	0.10778	0.106057	0.105169	0.105586	0.108581	0.111723	0.313212	0.307972	0.112034
419	0.013058	0.036955	0.079517	0.082749	0.089569	0.092953	0.10194	0.094338	0.100335	0.089233	0.107629	0.106023	0.104996	0.105461	0.108368	0.111514	0.313203	0.308005	0.11182
420	0.013032	0.036884	0.079422	0.082835	0.089774	0.09307	0.101953	0.094445	0.100509	0.089272	0.107708	0.106081	0.105204	0.1057	0.108494	0.111685	0.313389	0.308395	0.11189
421	0.01329	0.036709	0.079531	0.082574	0.089768	0.093049	0.101958	0.094304	0.100656	0.089291	0.107536	0.106025	0.105126	0.10563	0.108477	0.111693	0.313524	0.308452	0.11191
422	0.013414	0.036617	0.079491	0.082791	0.089919	0.093031	0.102017	0.094325	0.100607	0.089321	0.107584	0.106109	0.105108	0.105623	0.108572	0.111618	0.31365	0.308501	0.111809
423	0.013736	0.036973	0.079687	0.082984	0.090239	0.093236	0.102268	0.094407	0.10075	0.089482	0.107712	0.106171	0.105311	0.105925	0.108868	0.111876	0.313975	0.308915	0.111952
424	0.014039	0.037109	0.079832	0.083119	0.090497	0.093632	0.102396	0.094694	0.101018	0.089635	0.10787	0.106397	0.105668	0.106094	0.109209	0.112133	0.314418	0.309219	0.112111
425	0.014498	0.037283	0.080051	0.083372	0.090706	0.093796	0.102729	0.094884	0.10125	0.089926	0.107993	0.106514	0.105849	0.10638	0.109373	0.112138	0.314649	0.309616	0.112354
426	0.014732	0.037422	0.080297	0.083445	0.090882	0.094046	0.102872	0.095084	0.101475	0.089966	0.107949	0.106688	0.106021	0.106604	0.109649	0.112421	0.315011	0.309929	0.11259
427	0.015254	0.037633	0.080451	0.083754	0.091097	0.094268	0.103309	0.095257	0.101589	0.090359	0.108103	0.106913	0.106432	0.106974	0.109908	0.112613	0.315384	0.310357	0.112762
428	0.015966	0.037861	0.080675	0.084089	0.0915	0.094646	0.103708	0.095559	0.101887	0.090516	0.108371	0.107127	0.106781	0.107264	0.110279	0.112985	0.315985	0.310864	0.112991
429	0.01602	0.038091	0.08067	0.084158	0.091728	0.094867	0.103813	0.095694	0.102053	0.09074	0.108562	0.107464	0.107044	0.107517	0.110352	0.113073	0.316366	0.311139	0.113029
430	0.016436	0.038463	0.081104	0.084687	0.092131	0.095408	0.104348	0.095978	0.102656	0.091182	0.108992	0.107953	0.107465	0.107826	0.110801	0.113595	0.316984	0.311675	0.113601
431	0.016768	0.038816	0.081272	0.084978	0.092283	0.095653	0.10449	0.096268	0.102981	0.091423	0.109125	0.10819	0.107674	0.108283	0.111162	0.113901	0.317137	0.311782	0.11382
432	0.017264	0.03913	0.081885	0.085389	0.092738	0.096142	0.104922	0.09665	0.103285	0.091872	0.109547	0.108536	0.108099	0.10872	0.111609	0.114304	0.317514	0.312058	0.114091
433	0.017924	0.039657	0.082299	0.085615	0.093186	0.09671	0.105494	0.097159	0.103603	0.092311	0.10984	0.108995	0.108482	0.109101	0.112101	0.11463	0.317863	0.312551	0.114403
434	0.01841	0.040126	0.082742	0.085965	0.093846	0.097245	0.105959	0.097454	0.104245	0.092692	0.110267	0.1094	0.108967	0.109564	0.112528	0.115083	0.318379	0.313062	0.114952
435	0.018972	0.040223	0.082955	0.085859	0.093902	0.097417	0.106132	0.09767	0.10432	0.092978	0.110571	0.109515	0.109279	0.109684	0.112816	0.115206	0.318675	0.313442	0.115139
436	0.019672	0.040633	0.083487	0.086469	0.094537	0.09784	0.106215	0.098024	0.104768	0.093469	0.11094	0.110011	0.109767	0.110104	0.113122	0.115715	0.319101	0.313828	0.115405
437	0.020083	0.041218	0.084012	0.087169	0.095093	0.098496	0.107323	0.098647	0.105371	0.094214	0.111501	0.110593	0.110376	0.110739	0.113219	0.116382	0.319745	0.314446	0.116108
438	0.02081	0.041801	0.08446	0.087673	0.095682	0.099165	0.108005	0.099189	0.1059	0.094637	0.112145	0.11107	0.110755	0.111311	0.11378	0.116829	0.320367	0.314821	0.116562
439	0.021739	0.042325	0.084919	0.088307	0.096178	0.099823	0.108468	0.099584	0.106462	0.095171	0.11242	0.11145	0.111244	0.111682	0.114221	0.117402	0.32061	0.315189	0.117053
440	0.022281	0.042917	0.085784	0.089368	0.09662	0.100233	0.109076	0.100187	0.106961	0.09572	0.112852	0.111944	0.11186	0.112348	0.114762	0.117991	0.321035	0.315499	0.117518
441	0.023003	0.043523	0.086318	0.090032	0.097396	0.101002	0.109818	0.100751	0.107605	0.096279	0.113489	0.112604	0.112334	0.113067	0.11528	0.118554	0.321345	0.316184	0.118088
442	0.023667	0.044187	0.086917	0.090545	0.098001	0.101772	0.110464	0.101525	0.108243	0.097045	0.114303	0.113299	0.113072	0.113744	0.115827	0.119226	0.321947	0.316689	0.118701
443	0.024482	0.044779	0.087543	0.091217	0.098825	0.102354	0.111227	0.102036	0.108741	0.09773	0.114833	0.11388	0.113627	0.114312	0.116561	0.119713	0.322522	0.317027	0.119313
444	0.025168	0.045309	0.088176	0.091653	0.099235	0.102991	0.111584	0.102446	0.109313	0.098162	0.11535	0.114276	0.114347	0.114803	0.117073	0.12013	0.322587	0.317244	0.119759
445	0.025829	0.046212	0.08879	0.092318	0.0999	0.103616	0.112579	0.103163	0.110011	0.098925	0.116195	0.114849	0.114924	0.115589	0.117718	0.120739	0.323159	0.317287	0.120298
446	0.026486	0.046693	0.089414	0.093157	0.100568	0.104393	0.11332	0.103931	0.110673	0.09948	0.116982	0.115382	0.115641	0.116118	0.118426	0.121536	0.323544	0.317428	0.120809
447	0.027418	0.047477	0.090117	0.093821	0.101164	0.105033	0.113947	0.104653	0.111457	0.100144	0.117816	0.115953	0.116106	0.116869	0.11896	0.122069	0.323895	0.31787	0.121377
448	0.028295	0.048184	0.090997	0.094759	0.102197	0.106094	0.114781	0.105491	0.112218	0.101103	0.118762	0.116948	0.116502	0.117777	0.11989	0.122965	0.324688	0.318401	0.12234
449	0.028917	0.048799	0.091591	0.095125	0.102678	0.106597	0.11554	0.105857	0.112794	0.101569	0.119154	0.11756	0.11681	0.118349	0.120197	0.123292	0.324731	0.318729	0.122729
450	0.029404	0.048971	0.092252	0.095374	0.103026	0.106736	0.115812	0.106147	0.112918	0.101869	0.119389	0.117726	0.117248	0.118547	0.120412	0.123422	0.324609	0.318784	0.122919
451	0.031395	0.051061	0.094113	0.097052	0.104702	0.107903	0.117903	0.107208	0.114426	0.103582	0.120275	0.118825	0.119403	0.120939	0.122367	0.125572	0.326918	0.320696	0.124921
452	0.032481	0.051814	0.094909	0.09776	0.105504	0.10852	0.118489	0.107754	0.115078	0.104278	0.120939	0.119586	0.120183	0.121685	0.123122	0.126251	0.327205	0.321308	0.125446
453	0.033382	0.052839	0.095862	0.098578	0.106149	0.109496	0.119495	0.108756	0.116044	0.105105	0.122049	0.120462	0.121134	0.122522	0.124038	0.126961	0.328125	0.32199	0.126237
454	0.034117	0.05358	0.096531	0.098889	0.106508	0.11006	0.119889	0.109406	0.116526	0.105799	0.122438	0.120934	0.121699	0.122963	0.124712	0.127532	0.328463	0.322282	0.126877
455	0.035041	0.054367	0.097322	0.099391	0.107261	0.110861	0.120213	0.110054	0.117367	0.10651	0.123304	0.121745	0.122424	0.123679	0.125496	0.128414	0.329171	0.322876	0.127408
456	0.036049	0.055155	0.098107	0.100215	0.108066	0.111601	0.1208	0.110813	0.118041	0.107288	0.123862	0.122448	0.123143	0.124279	0.126099	0.128899	0.329301	0.323328	0.128225
457	0.03706	0.056144	0.098887	0.101149	0.108895	0.112506	0.121723	0.111714	0.118757	0.108206	0.124638	0.123721	0.124091	0.125151	0.127108	0.129916	0.330161	0.323888	0.129003
458	0.038107	0.056961	0.099607	0.101775	0.10961	0.113233	0.122342	0.112319	0.119437	0.108985	0.125382	0.124508	0.124676	0.125605	0.127625	0.130663	0.330453	0.324436	0.129217
459	0.038918	0.057796	0.100488	0.102567	0.110404	0.113904	0.123024	0.113031	0.120134	0.109622	0.126162	0.1254	0.125492	0.125961	0.128422	0.131371	0.331005	0.325038	0.129517
460	0.040118	0.058565	0.10118	0.103144	0.111253	0.114745	0.123634	0.113778	0.120693	0.110022	0.126718	0.125865	0.126113	0.12674	0.128907	0.132069	0.331519	0.325361	0.130284
461	0.041078	0.059755	0.102169	0.104108	0.112157	0.115552	0.124645	0.114704	0.121638	0.110586	0.127621	0.126804	0.127338	0.127562	0.129892	0.132869	0.332058	0.325887	0.131178
462	0.042066	0.060431	0.102792	0.104904	0.112859	0.116421	0.125433	0.11546	0.122307	0.11119	0.128286	0.127508	0.128059	0.128297	0.130523	0.133843	0.332694	0.326265	0.131974
463	0.043216	0.06145	0.103746	0.105741	0.113685	0.117277	0.126234	0.11645	0.123162	0.112072	0.129202	0.128337	0.128718	0.129202	0.131317	0.135093	0.333102	0.326878	0.132564
464	0.044165	0.062365	0.104717	0.106765	0.11451	0.118187	0.127108	0.117403	0.12399	0.113012	0.130165	0.128886	0.129566	0.1301	0.132219	0.135875	0.333736	0.327645	0.133406
465	0.045178	0.063244	0.105511	0.107469	0.115405	0.119143	0.127919	0.118156	0.12489	0.113771	0.130958	0.129302	0.13037	0.130958	0.13313	0.136768	0.334106	0.328074	0.134334
466	0.046231	0.064028	0.106163	0.108352	0.116289	0.119884	0.128752	0.118956	0.125638	0.11453	0.131647	0.130016	0.131178	0.131495	0.13391	0.137624	0.334479	0.328529	0.135007
467	0.047053	0.064941	0.106809	0.109188	0.117181	0.120619	0.129939	0.119793	0.1264	0.115394	0.132469	0.130776	0.132094	0.132322	0.134671	0.13843	0.334734	0.328999	0.135835
468	0.048181	0.06594	0.10764	0.110091	0.118027	0.121446	0.130956	0.120652	0.127198	0.11629	0.133347	0.131793	0.132988	0.133103	0.135413	0.139329	0.335078	0.329592	0.136525
469	0.049091	0.066972	0.108518	0.110916	0.118874	0.122313	0.131777	0.12154	0.128078	0.117153	0.134193	0.132498	0.133761	0.133998	0.136333	0.139983	0.335613	0.330116	0.137341
470	0.050339	0.067925	0.109326	0.111774	0.119686	0.123054	0.132453	0.12228	0.128994	0.117903	0.13509	0.133421	0.134505	0.134786	0.137144	0.14089	0.336043	0.330575	0.138249
471	0.051245	0.068979	0.110302	0.112609	0.120602	0.124153	0.133238	0.123132	0.129735	0.118756	0.136197	0.134169	0.135294	0.13555	0.137883	0.141482	0.336432	0.330999	0.138914
472	0.052261	0.06979	0.1111	0.113447	0.121492	0.124883	0.133861	0.123992	0.13043	0.119428	0.137072	0.134993	0.13592	0.13651	0.138702	0.142344	0.33709	0.331457	0.139907
473	0.053308	0.070874	0.11196	0.114299	0.122796	0.125856	0.13501	0.124834	0.131382	0.120257	0.137757	0.135834	0.136838	0.137293	0.139554	0.143331	0.337598	0.332012	0.141028
474	0.054529	0.071944	0.113109	0.115461	0.123783	0.126949	0.135947	0.125827	0.13244	0.12138	0.138961	0.136777	0.137846	0.138241	0.140517	0.144433	0.338224	0.332825	0.142064
475	0.05573	0.07293	0.113989	0.116358	0.124619	0.12797	0.13687	0.126724	0.133324	0.122177	0.13976	0.13761	0.138695	0.139118	0.141388	0.145066	0.338707	0.333093	0.142968
476	0.056844	0.073981	0.115033	0.117404	0.125668	0.128936	0.137837	0.127704	0.134187	0.122975	0.140467	0.138522	0.139664	0.140007	0.142412	0.145972	0.339301	0.333769	0.143857
477	0.057928	0.075067	0.116103	0.118798	0.126584	0.12989	0.138675	0.128621	0.135131	0.123992	0.141583	0.139512	0.140466	0.14108	0.143444	0.146924	0.340039	0.334387	0.144599
478	0.059218	0.076102	0.117087	0.119776	0.127579	0.130974	0.139716	0.129772	0.136083	0.125049	0.142534	0.140403	0.141368	0.141886	0.144289	0.147903	0.340598	0.335029	0.145644
479	0.060215	0.077284	0.118148	0.120823	0.12862	0.132117	0.140654	0.130692	0.137153	0.125983	0.143497	0.141351	0.142121	0.142933	0.145359	0.148795	0.34141	0.335649	0.146695
480	0.061461	0.078256	0.119036	0.121638	0.129443	0.132979	0.141463	0.131699	0.137974	0.126897	0.144274	0.142087	0.142868	0.143802	0.146122	0.149605	0.341821	0.336245	0.147444
481	0.062614	0.079266	0.120099	0.12264	0.130585	0.13421	0.142436	0.132738	0.139029	0.127841	0.14541	0.143045	0.143942	0.144754	0.147161	0.150611	0.342509	0.3369	0.148179
482	0.063522	0.080462	0.121233	0.123809	0.131703	0.135589	0.143523	0.133785	0.140177	0.128891	0.146536	0.143975	0.144874	0.145777	0.148217	0.151476	0.343215	0.337662	0.149338
483	0.064642	0.081482	0.122038	0.124676	0.132582	0.136706	0.144198	0.134543	0.141042	0.129803	0.147364	0.144846	0.145608	0.146598	0.148883	0.152406	0.343949	0.338202	0.150094
484	0.06559	0.082509	0.122738	0.125255	0.133097	0.137508	0.14486	0.135304	0.141695	0.130371	0.148083	0.14544	0.146397	0.147235	0.149575	0.152946	0.34457	0.338888	0.150659
485	0.066033	0.082954	0.123173	0.125658	0.133496	0.137933	0.145213	0.135648	0.142013	0.130826	0.148569	0.145833	0.146669	0.147598	0.149922	0.153401	0.344951	0.339178	0.151085
486	0.068188	0.084838	0.124974	0.127341	0.135323	0.13981	0.146534	0.13754	0.143754	0.132487	0.149999	0.147685	0.148664	0.149545	0.151394	0.155175	0.346224	0.340095	0.153019
487	0.069057	0.085739	0.126127	0.128418	0.136119	0.140681	0.147383	0.138319	0.144396	0.133228	0.150655	0.148279	0.149462	0.150421	0.152135	0.155956	0.34685	0.340636	0.153623
488	0.070234	0.086876	0.127095	0.129375	0.13712	0.141523	0.148255	0.139243	0.145313	0.134339	0.151532	0.149109	0.150181	0.151194	0.153056	0.156948	0.347651	0.341282	0.154634
489	0.071212	0.087661	0.127905	0.130199	0.13773	0.142377	0.148969	0.140188	0.146321	0.13493	0.152146	0.149854	0.150638	0.152034	0.153798	0.157768	0.347974	0.341701	0.155321
490	0.071795	0.088542	0.128538	0.131101	0.138588	0.142905	0.149476	0.14099	0.147091	0.135785	0.153118	0.150782	0.151185	0.15262	0.154511	0.158453	0.348413	0.342211	0.155961
491	0.072782	0.089214	0.129524	0.13182	0.139431	0.143787	0.150108	0.141639	0.147875	0.136589	0.153944	0.151436	0.151837	0.153566	0.155063	0.159171	0.348808	0.342433	0.156689
492	0.073815	0.090073	0.130042	0.132577	0.140089	0.144497	0.1507	0.142222	0.148508	0.137142	0.154783	0.151818	0.15243	0.153986	0.155743	0.159807	0.348995	0.342499	0.157353
493	0.074573	0.090868	0.130994	0.133104	0.14082	0.144931	0.151475	0.142865	0.149287	0.137833	0.155666	0.15282	0.153216	0.154836	0.156337	0.160441	0.349271	0.343027	0.15811
494	0.075325	0.091484	0.131649	0.133964	0.141535	0.145812	0.152011	0.143456	0.150009	0.138407	0.156216	0.153482	0.154025	0.155584	0.157137	0.16111	0.349581	0.34347	0.158885
495	0.075872	0.091965	0.13183	0.134299	0.141751	0.146066	0.152238	0.14372	0.150457	0.138739	0.15659	0.153761	0.154398	0.155739	0.157244	0.161371	0.349681	0.343496	0.159173
496	0.076692	0.092586	0.132481	0.134974	0.142415	0.146497	0.152691	0.144271	0.150994	0.139262	0.157104	0.154178	0.155093	0.156319	0.157838	0.161776	0.349861	0.343588	0.159404
497	0.077082	0.092991	0.13292	0.135479	0.142775	0.146935	0.15308	0.14473	0.151522	0.139748	0.157605	0.154653	0.155576	0.156758	0.158147	0.162285	0.350067	0.343776	0.160083
498	0.077824	0.093437	0.133135	0.13569	0.143216	0.147277	0.153445	0.145009	0.151833	0.140052	0.157793	0.155171	0.155688	0.157302	0.158524	0.16258	0.350042	0.343936	0.160406
499	0.078066	0.09393	0.133754	0.136254	0.143458	0.14766	0.153948	0.145601	0.152276	0.140333	0.158272	0.155429	0.15604	0.157507	0.15899	0.162932	0.350509	0.344582	0.160655
500	0.078442	0.094189	0.13391	0.136438	0.143816	0.147821	0.154012	0.145665	0.152594	0.140635	0.158562	0.155766	0.156396	0.157721	0.159188	0.163228	0.350441	0.344691	0.160917
501	0.078542	0.094512	0.134276	0.136687	0.144085	0.147977	0.154255	0.14587	0.152759	0.141	0.158707	0.155743	0.156597	0.157951	0.159458	0.163441	0.350465	0.344316	0.161018
502	0.079081	0.094603	0.134242	0.13644	0.144022	0.147999	0.154243	0.146065	0.152745	0.141168	0.158841	0.155761	0.156452	0.15793	0.159317	0.163408	0.350266	0.344567	0.161319
503	0.079397	0.094758	0.134452	0.136726	0.144294	0.148055	0.154183	0.146217	0.153024	0.141339	0.158803	0.15587	0.156483	0.158088	0.159477	0.163383	0.350308	0.344258	0.161445
504	0.079587	0.095069	0.13461	0.136997	0.144367	0.148385	0.154438	0.146468	0.15339	0.141861	0.159226	0.156022	0.15669	0.158451	0.159643	0.163775	0.350008	0.344166	0.16178
505	0.079905	0.095291	0.134817	0.13716	0.144441	0.148508	0.154482	0.146546	0.153502	0.14191	0.159241	0.156396	0.156887	0.158708	0.159927	0.164009	0.349937	0.344155	0.161964
506	0.080144	0.095253	0.134801	0.137175	0.144239	0.148521	0.154355	0.146649	0.153493	0.141788	0.159374	0.156215	0.15675	0.158402	0.160224	0.163813	0.349527	0.343876	0.161792
507	0.080357	0.095423	0.135399	0.137368	0.144606	0.148778	0.154713	0.146954	0.153808	0.142172	0.159628	0.156591	0.157103	0.158917	0.160631	0.164136	0.349758	0.344188	0.162112
508	0.080494	0.096033	0.135654	0.13792	0.144956	0.149058	0.154934	0.147368	0.154182	0.142506	0.159962	0.156777	0.157368	0.159166	0.160886	0.164272	0.349848	0.344242	0.162282
509	0.081055	0.096417	0.135778	0.138026	0.145251	0.14926	0.155172	0.147421	0.15424	0.142706	0.160115	0.156831	0.157558	0.159377	0.160978	0.164565	0.349689	0.34434	0.162139
510	0.08137	0.096516	0.136119	0.138349	0.145428	0.149489	0.155239	0.147734	0.154405	0.142991	0.160196	0.157131	0.157652	0.159379	0.161117	0.164599	0.349599	0.344243	0.162239
511	0.081575	0.096791	0.136356	0.138515	0.145602	0.149813	0.155661	0.14797	0.155056	0.143071	0.160632	0.157544	0.158048	0.15983	0.161511	0.164882	0.349875	0.344255	0.16263
512	0.081857	0.097122	0.13663	0.138916	0.145883	0.150117	0.155799	0.148219	0.155277	0.143478	0.160764	0.157972	0.15831	0.160005	0.161585	0.165182	0.350058	0.344288	0.162834
513	0.082585	0.097518	0.137023	0.139287	0.14654	0.150478	0.156088	0.14859	0.155702	0.143816	0.16129	0.158409	0.158673	0.160336	0.162131	0.16562	0.350211	0.344549	0.163118
514	0.083042	0.097957	0.137551	0.139606	0.146811	0.15082	0.156606	0.148876	0.156132	0.144358	0.161659	0.158818	0.158961	0.160578	0.162404	0.165969	0.35053	0.344762	0.163547
515	0.083283	0.098716	0.138171	0.140085	0.147643	0.151299	0.157434	0.149449	0.156557	0.144861	0.162178	0.15928	0.159354	0.161211	0.162781	0.166592	0.350695	0.345065	0.163895
516	0.084147	0.099333	0.138707	0.140797	0.14823	0.151844	0.157994	0.150082	0.157146	0.145536	0.162937	0.159824	0.159847	0.161899	0.163498	0.167083	0.351265	0.345602	0.164534
517	0.084975	0.100237	0.139379	0.141452	0.148982	0.152419	0.158549	0.150727	0.157723	0.146043	0.163456	0.160512	0.16036	0.162512	0.164163	0.167719	0.351834	0.345914	0.165267
518	0.085918	0.101015	0.140276	0.142222	0.149879	0.153186	0.159434	0.151755	0.158563	0.146871	0.164109	0.161292	0.161107	0.163409	0.164736	0.168348	0.352496	0.346434	0.165864
519	0.086862	0.102123	0.141097	0.143101	0.150751	0.153999	0.160246	0.152672	0.159506	0.147679	0.164928	0.162043	0.161928	0.164106	0.165517	0.169224	0.353245	0.347186	0.166701
520	0.087919	0.103024	0.142117	0.144019	0.15165	0.15475	0.161119	0.15341	0.160319	0.148583	0.165816	0.162873	0.162676	0.164935	0.166464	0.170078	0.353712	0.347895	0.167737
521	0.089251	0.10436	0.143238	0.145133	0.152696	0.15583	0.162457	0.154607	0.161344	0.149549	0.166751	0.163917	0.163606	0.165927	0.167339	0.170961	0.354673	0.348626	0.168729
522	0.090582	0.105838	0.14445	0.146662	0.154071	0.157134	0.163583	0.15573	0.162636	0.150842	0.167998	0.164983	0.164998	0.167172	0.168741	0.172187	0.355695	0.349748	0.169753
523	0.091988	0.107422	0.145804	0.14814	0.155362	0.158305	0.164919	0.156931	0.163784	0.152094	0.169235	0.166287	0.165938	0.16848	0.169899	0.173398	0.356672	0.350447	0.171023
524	0.09367	0.109034	0.147283	0.149536	0.156983	0.15982	0.166353	0.158358	0.165318	0.153643	0.170785	0.167656	0.167332	0.16985	0.171385	0.17476	0.357845	0.351664	0.172204
525	0.095354	0.110955	0.14898	0.150996	0.158515	0.161549	0.167953	0.159931	0.166691	0.155216	0.172294	0.169228	0.168922	0.171399	0.172822	0.176462	0.359305	0.353116	0.173786
526	0.097113	0.11266	0.15062	0.152766	0.160155	0.163004	0.169672	0.161496	0.168511	0.156674	0.173858	0.170654	0.170242	0.172919	0.174367	0.177901	0.360565	0.354418	0.175333
527	0.098972	0.114853	0.152501	0.154506	0.162096	0.164825	0.171528	0.163199	0.170422	0.158436	0.175631	0.172429	0.172262	0.17469	0.176056	0.179592	0.362173	0.355827	0.176989
528	0.101278	0.117223	0.154639	0.156588	0.164234	0.166919	0.173668	0.165117	0.172344	0.160436	0.177645	0.174392	0.174249	0.176703	0.178173	0.181697	0.363965	0.357563	0.179037
529	0.10354	0.119535	0.156573	0.158735	0.166272	0.168753	0.175699	0.166872	0.174389	0.162256	0.179681	0.17634	0.176142	0.178561	0.180113	0.183461	0.365437	0.359161	0.18101
530	0.105886	0.121914	0.158895	0.160905	0.168475	0.170961	0.177961	0.168959	0.176578	0.164418	0.181581	0.178426	0.178116	0.180577	0.182273	0.185676	0.367302	0.360929	0.183038
531	0.10853	0.124889	0.161235	0.163389	0.170949	0.173312	0.180071	0.171172	0.178844	0.16672	0.183842	0.180679	0.180419	0.182799	0.184519	0.187689	0.369352	0.362896	0.185082
532	0.111253	0.127818	0.163814	0.165928	0.173338	0.175641	0.182613	0.173821	0.181452	0.169006	0.186462	0.182931	0.182839	0.185117	0.186948	0.190223	0.371425	0.364949	0.187713
533	0.114164	0.13085	0.166536	0.16884	0.176273	0.178572	0.185411	0.17652	0.184094	0.171866	0.189	0.18551	0.185526	0.187815	0.189734	0.192872	0.373766	0.367372	0.190219
534	0.11719	0.134103	0.169578	0.171594	0.1793	0.18149	0.188406	0.179377	0.187132	0.174784	0.191939	0.18829	0.188324	0.190507	0.192423	0.195571	0.376262	0.369644	0.192963
535	0.12102	0.13765	0.172701	0.174867	0.18253	0.184621	0.191699	0.182554	0.190379	0.177878	0.195149	0.19124	0.191348	0.193834	0.19557	0.19851	0.378937	0.372405	0.195821
536	0.124529	0.141434	0.176078	0.178233	0.185843	0.188057	0.194926	0.185781	0.193647	0.180951	0.198136	0.19458	0.194547	0.197255	0.198646	0.201726	0.381812	0.375306	0.198895
537	0.128158	0.1453	0.179773	0.181879	0.189319	0.191543	0.198464	0.189325	0.197258	0.184072	0.201625	0.197969	0.197989	0.200547	0.202069	0.205101	0.384668	0.378108	0.202462
538	0.13215	0.149235	0.183361	0.185563	0.192991	0.195195	0.201923	0.193063	0.200547	0.187508	0.205066	0.201492	0.201334	0.203881	0.205369	0.208428	0.387563	0.380968	0.205748
539	0.136285	0.153562	0.187215	0.189273	0.196826	0.19883	0.205656	0.196735	0.204463	0.191062	0.208634	0.205218	0.204833	0.207375	0.209064	0.212039	0.390818	0.384204	0.209305
540	0.140571	0.157789	0.191182	0.193184	0.200839	0.202971	0.209621	0.20067	0.208363	0.195063	0.212653	0.208899	0.208613	0.211138	0.212764	0.215798	0.394119	0.387545	0.213031
541	0.144979	0.162561	0.195574	0.197538	0.205237	0.207147	0.213723	0.204945	0.21259	0.199121	0.216731	0.213147	0.212563	0.215152	0.216879	0.219689	0.39757	0.390968	0.217118
542	0.149871	0.167505	0.200021	0.201905	0.20968	0.211545	0.217942	0.209171	0.216988	0.203107	0.220935	0.217345	0.21684	0.219208	0.220927	0.223775	0.401323	0.394739	0.221158
543	0.154818	0.172683	0.20464	0.20669	0.214386	0.216127	0.222536	0.21379	0.22147	0.207507	0.225529	0.221792	0.221386	0.223647	0.225424	0.228243	0.405155	0.398626	0.22554
544	0.159891	0.177894	0.209432	0.211378	0.219116	0.220847	0.227251	0.218361	0.226163	0.212161	0.230059	0.226374	0.225837	0.228132	0.229898	0.23267	0.409226	0.402637	0.230105
545	0.165267	0.183461	0.214471	0.216639	0.224273	0.22601	0.232365	0.223421	0.231284	0.217118	0.235001	0.23124	0.230834	0.233042	0.234809	0.2373	0.413568	0.406836	0.235069
546	0.170967	0.189355	0.219962	0.222161	0.229803	0.231196	0.237691	0.228678	0.23664	0.2224	0.240403	0.236493	0.235963	0.238189	0.239956	0.242414	0.418365	0.41149	0.240214
547	0.176748	0.195566	0.225564	0.227615	0.23537	0.236748	0.243271	0.234081	0.242178	0.227483	0.245745	0.24186	0.241407	0.243374	0.245195	0.247683	0.423019	0.416057	0.245222
548	0.183062	0.201783	0.23141	0.233355	0.241116	0.242506	0.248873	0.239796	0.247963	0.233119	0.251279	0.247392	0.246844	0.248936	0.250552	0.253204	0.427866	0.420878	0.25085
549	0.18918	0.208263	0.237207	0.239159	0.246927	0.248191	0.254585	0.245282	0.253387	0.238487	0.257025	0.252877	0.252398	0.254137	0.255827	0.258547	0.432653	0.42558	0.256258
550	0.195468	0.21464	0.243289	0.245257	0.252966	0.254254	0.260414	0.251182	0.259343	0.24429	0.262714	0.258698	0.25806	0.259952	0.261553	0.264234	0.437922	0.430536	0.26201
551	0.202055	0.221367	0.249294	0.251374	0.259127	0.260421	0.266407	0.257223	0.265419	0.250199	0.268744	0.264634	0.26411	0.265752	0.26725	0.269926	0.442975	0.435812	0.267727
552	0.208857	0.228145	0.255612	0.257672	0.265389	0.266591	0.272483	0.263351	0.271498	0.256005	0.274787	0.270551	0.269935	0.271523	0.273045	0.275729	0.447903	0.440766	0.273465
553	0.215301	0.235125	0.262449	0.264027	0.27179	0.272959	0.278856	0.269579	0.277797	0.262306	0.281106	0.276847	0.276176	0.277679	0.279118	0.281861	0.453249	0.445982	0.279686
554	0.222119	0.242231	0.268804	0.270614	0.278208	0.279349	0.28528	0.275903	0.28416	0.268247	0.287265	0.282898	0.282125	0.283711	0.285279	0.287972	0.458624	0.451252	0.285767
555	0.229155	0.249411	0.27538	0.277172	0.284833	0.285961	0.29173	0.282391	0.290619	0.274506	0.293833	0.289332	0.288334	0.289931	0.291589	0.294243	0.463944	0.456792	0.292145
556	0.236361	0.256862	0.282193	0.283956	0.291433	0.292445	0.298369	0.289019	0.297187	0.280982	0.30022	0.295791	0.294647	0.296241	0.297828	0.300483	0.4695	0.461977	0.298463
557	0.2438	0.264548	0.289117	0.290984	0.2983	0.299489	0.305158	0.295692	0.303977	0.287565	0.307039	0.302406	0.301074	0.30272	0.304352	0.306974	0.474924	0.467454	0.304929
558	0.25135	0.272369	0.296128	0.298113	0.305276	0.306556	0.312098	0.302529	0.310993	0.294273	0.313725	0.309137	0.307734	0.30928	0.310849	0.313759	0.480814	0.473404	0.311686
559	0.259148	0.280165	0.303339	0.305257	0.312415	0.31358	0.319061	0.30956	0.317971	0.301052	0.320701	0.316108	0.314558	0.316102	0.317786	0.320331	0.486879	0.479293	0.318318
560	0.266842	0.288164	0.310923	0.312634	0.319961	0.320878	0.32626	0.31674	0.325265	0.308174	0.327889	0.323183	0.321641	0.323136	0.324829	0.327366	0.492858	0.485034	0.325493
561	0.274647	0.296386	0.318462	0.320201	0.327269	0.328378	0.333722	0.324038	0.332458	0.315228	0.335293	0.330484	0.328749	0.329926	0.331936	0.334238	0.498822	0.491053	0.332653
562	0.282294	0.304252	0.325658	0.327467	0.334663	0.335459	0.340599	0.331029	0.339769	0.322206	0.342067	0.337352	0.335555	0.336726	0.338945	0.34113	0.504652	0.496928	0.339366
563	0.290205	0.312686	0.333213	0.335096	0.342074	0.343046	0.34798	0.338352	0.347095	0.329384	0.349626	0.34443	0.342857	0.343951	0.346022	0.348374	0.510554	0.502923	0.346468
564	0.298434	0.320847	0.340807	0.342649	0.349648	0.350885	0.355555	0.345776	0.354707	0.336811	0.356803	0.351965	0.349945	0.351189	0.35319	0.355512	0.516298	0.508712	0.353773
565	0.306845	0.329356	0.348707	0.350583	0.357415	0.358372	0.363049	0.353346	0.362046	0.344037	0.364204	0.359174	0.356889	0.358243	0.360154	0.362475	0.522327	0.515029	0.360957
566	0.315563	0.338024	0.356737	0.358498	0.365303	0.366163	0.370725	0.361153	0.369794	0.351678	0.371865	0.366422	0.364287	0.365811	0.367594	0.369839	0.528544	0.521096	0.36834
567	0.324232	0.347179	0.36504	0.366925	0.373625	0.374564	0.37854	0.368922	0.377919	0.359499	0.37988	0.374337	0.371791	0.373296	0.375503	0.377701	0.534912	0.52765	0.376465
568	0.333548	0.356344	0.373513	0.375741	0.382207	0.383053	0.387048	0.377325	0.386237	0.36762	0.388037	0.382546	0.379714	0.381439	0.383288	0.385567	0.541384	0.534329	0.38451
569	0.343265	0.366381	0.382731	0.384742	0.391336	0.391912	0.39597	0.386137	0.395022	0.376297	0.396537	0.390909	0.388047	0.38946	0.391705	0.39377	0.54828	0.541165	0.393124
570	0.353327	0.376608	0.39232	0.393842	0.400696	0.401138	0.405115	0.39539	0.404037	0.385101	0.405523	0.400049	0.396933	0.39841	0.400548	0.402739	0.555659	0.548637	0.4017
571	0.364089	0.387415	0.402184	0.403815	0.410329	0.411062	0.414919	0.405117	0.413737	0.394588	0.415261	0.409606	0.406198	0.407635	0.41006	0.412048	0.563473	0.556761	0.411185
572	0.375422	0.398952	0.412348	0.414078	0.420587	0.421377	0.425124	0.414893	0.423984	0.404334	0.425109	0.419252	0.415838	0.417276	0.41983	0.421553	0.571584	0.564688	0.421035
573	0.386718	0.410874	0.423497	0.425096	0.431592	0.432097	0.435654	0.425379	0.434665	0.41475	0.435666	0.429736	0.425804	0.427425	0.430081	0.431583	0.58029	0.573119	0.431253
574	0.398398	0.422796	0.434508	0.435906	0.442389	0.442742	0.446262	0.435706	0.444828	0.425167	0.445761	0.439694	0.435866	0.437558	0.439823	0.441441	0.588827	0.581749	0.441269
575	0.410696	0.435291	0.445738	0.447291	0.453704	0.454133	0.457629	0.447103	0.455987	0.435834	0.456781	0.450694	0.446687	0.448358	0.450402	0.45232	0.597965	0.590903	0.452217
576	0.423461	0.448473	0.457947	0.459289	0.465629	0.46587	0.468961	0.458712	0.467664	0.447298	0.468325	0.462066	0.457691	0.459612	0.461754	0.463238	0.607549	0.600316	0.463172
577	0.43701	0.461907	0.470642	0.47155	0.477969	0.478164	0.481221	0.470434	0.479649	0.458992	0.479905	0.473569	0.468847	0.470879	0.472958	0.474661	0.617396	0.610307	0.474631
578	0.451115	0.475941	0.483202	0.484345	0.490476	0.490763	0.49335	0.482797	0.491955	0.471135	0.492056	0.485639	0.480833	0.482915	0.484553	0.486593	0.627414	0.620489	0.48679
579	0.46607	0.490887	0.496897	0.497576	0.503956	0.503978	0.506569	0.495829	0.505056	0.483716	0.50502	0.498349	0.493606	0.495386	0.497195	0.499083	0.638374	0.631608	0.499277
580	0.480933	0.50675	0.511172	0.512129	0.518153	0.518053	0.520633	0.50989	0.519136	0.497204	0.51854	0.51188	0.506727	0.50845	0.510395	0.512002	0.649554	0.642979	0.512731
581	0.497223	0.522994	0.526151	0.527121	0.533019	0.532955	0.534711	0.523976	0.533157	0.511459	0.53257	0.525765	0.520303	0.522377	0.524311	0.525567	0.661526	0.654868	0.526682
582	0.5143	0.540373	0.54252	0.542879	0.548916	0.548447	0.550264	0.539251	0.548708	0.526363	0.547753	0.540591	0.535058	0.537149	0.539496	0.540335	0.674657	0.667892	0.541371
583	0.53161	0.557605	0.557788	0.558416	0.564324	0.563989	0.565534	0.554417	0.563714	0.540948	0.562676	0.555496	0.549468	0.551899	0.554012	0.554787	0.687215	0.680603	0.556342
584	0.546481	0.573179	0.571807	0.572404	0.57811	0.577213	0.578988	0.567676	0.577348	0.554246	0.575836	0.568432	0.562193	0.564472	0.566443	0.567295	0.698389	0.691332	0.5692
585	0.554094	0.580573	0.578574	0.578955	0.584467	0.584151	0.585362	0.574044	0.583346	0.560233	0.582065	0.574458	0.568103	0.570546	0.572455	0.572921	0.703271	0.696196	0.575086
586	0.585662	0.614498	0.609905	0.610246	0.615995	0.615417	0.616782	0.605069	0.615254	0.590411	0.613137	0.605754	0.599267	0.60164	0.603202	0.603609	0.730903	0.724089	0.606074
587	0.605548	0.635	0.628868	0.629019	0.634516	0.633791	0.635205	0.623515	0.633557	0.608053	0.631405	0.623339	0.617095	0.619041	0.620872	0.620969	0.74632	0.739516	0.623821
588	0.626493	0.65652	0.648087	0.648243	0.654029	0.652939	0.653767	0.642063	0.652174	0.626248	0.649711	0.641689	0.634619	0.636938	0.638539	0.638544	0.761909	0.755109	0.641858
589	0.647872	0.678105	0.668057	0.668132	0.673671	0.672303	0.672537	0.660653	0.671028	0.644711	0.668083	0.659983	0.652695	0.655275	0.656939	0.656569	0.777983	0.771243	0.659861
590	0.669537	0.700124	0.687969	0.687962	0.693196	0.691942	0.692007	0.679974	0.690399	0.663454	0.68726	0.679082	0.671104	0.674024	0.675535	0.675202	0.7944	0.78766	0.678859
591	0.692195	0.722602	0.708547	0.708704	0.713731	0.712186	0.712209	0.700067	0.71061	0.682969	0.70703	0.698602	0.690389	0.692944	0.694638	0.693948	0.811002	0.804486	0.698371
592	0.71569	0.746443	0.729947	0.73015	0.735436	0.733389	0.732617	0.72019	0.73078	0.703134	0.727227	0.717966	0.709949	0.712431	0.714042	0.712876	0.828404	0.821744	0.717984
593	0.740209	0.770692	0.7523	0.751949	0.757247	0.755225	0.753883	0.741463	0.751972	0.723719	0.748055	0.73891	0.730139	0.733079	0.734853	0.733379	0.846252	0.839448	0.738374
594	0.765302	0.795338	0.774691	0.774611	0.779118	0.77749	0.775875	0.763058	0.77378	0.745095	0.769489	0.760277	0.751396	0.754103	0.755804	0.754242	0.86517	0.857724	0.759733
595	0.790915	0.820497	0.797863	0.797991	0.802626	0.800426	0.797958	0.785225	0.796204	0.766978	0.791448	0.782203	0.772236	0.775384	0.776678	0.774958	0.883808	0.876167	0.781206
596	0.816458	0.846461	0.821221	0.821003	0.825665	0.823059	0.820522	0.807836	0.818061	0.78895	0.813099	0.803576	0.793609	0.796942	0.797794	0.795889	0.902194	0.894972	0.802457
597	0.841895	0.871796	0.844188	0.843628	0.848294	0.845585	0.842526	0.82947	0.839794	0.810103	0.83509	0.824959	0.814381	0.817936	0.819059	0.816703	0.920415	0.913558	0.82358
598	0.866607	0.896091	0.866797	0.8661	0.870109	0.867319	0.863933	0.850814	0.861433	0.831425	0.855678	0.845696	0.83498	0.838517	0.839397	0.836906	0.93831	0.93145	0.843941
599	0.891308	0.919944	0.888362	0.888042	0.891824	0.889231	0.884987	0.871518	0.88247	0.851858	0.876325	0.86618	0.854857	0.858665	0.859112	0.856605	0.956107	0.948559	0.864674
600	0.915295	0.943447	0.910207	0.90916	0.913456	0.910166	0.905261	0.892093	0.902961	0.872005	0.896257	0.88589	0.874183	0.877988	0.878415	0.875654	0.973859	0.966016	0.884131
601	0.93844	0.965905	0.931184	0.929549	0.933784	0.929789	0.924702	0.911799	0.922173	0.890996	0.916052	0.905064	0.89264	0.896976	0.897024	0.894119	0.990206	0.982472	0.903067
602	0.960782	0.98739	0.95079	0.94937	0.952926	0.949007	0.943884	0.930295	0.940778	0.909401	0.933808	0.92314	0.910414	0.914949	0.914824	0.911554	1.00593	0.998031	0.921113
603	0.981972	1.00796	0.969744	0.968144	0.971446	0.96746	0.961526	0.948221	0.958811	0.92716	0.951727	0.940278	0.927529	0.931988	0.931759	0.928165	1.02041	1.01272	0.938326
604	1.00157	1.02664	0.987783	0.985449	0.989574	0.984975	0.978291	0.964712	0.975334	0.943824	0.968171	0.956637	0.943372	0.947794	0.94744	0.943884	1.03443	1.02652	0.954539
605	1.02035	1.0449	1.00408	1.00273	1.00513	1.00153	0.994264	0.980239	0.991189	0.959051	0.98358	0.971617	0.958228	0.962965	0.962475	0.959195	1.04779	1.04023	0.969288
606	1.03778	1.061	1.01943	1.01704	1.0204	1.01559	1.00821	0.994684	1.00544	0.973607	0.997998	0.985993	0.972178	0.977143	0.97601	0.972704	1.05949	1.05242	0.983628
607	1.0531	1.07527	1.03293	1.03047	1.03355	1.02882	1.02073	1.00751	1.01804	0.986613	1.0104	0.998558	0.984108	0.988963	0.987931	0.984374	1.06961	1.06279	0.995625
608	1.06567	1.08741	1.04499	1.04216	1.0448	1.04013	1.03178	1.01848	1.02852	0.997325	1.02127	1.00851	0.994603	0.999347	0.997982	0.995225	1.07909	1.07259	1.00656
609	1.07642	1.09777	1.0546	1.05086	1.05402	1.04982	1.0401	1.02755	1.03687	1.00581	1.02974	1.01725	1.0035	1.00795	1.00689	1.0037	1.0866	1.07953	1.01503
610	1.08562	1.10482	1.06253	1.05867	1.06199	1.05691	1.048	1.03518	1.0448	1.01324	1.03748	1.02419	1.01049	1.01486	1.01337	1.0111	1.09301	1.08565	1.02177
611	1.09211	1.11151	1.06796	1.06497	1.0675	1.06322	1.05349	1.04092	1.05054	1.01905	1.04339	1.02992	1.01568	1.0202	1.01892	1.01638	1.09712	1.09041	1.02737
612	1.09664	1.11572	1.07296	1.06915	1.0714	1.06722	1.05748	1.04503	1.05421	1.02322	1.04713	1.03388	1.02026	1.02437	1.02249	1.02014	1.1004	1.0936	1.03164
613	1.09972	1.11792	1.07647	1.07195	1.07441	1.07027	1.06042	1.04794	1.05682	1.02607	1.0502	1.03672	1.02247	1.02702	1.02542	1.02335	1.10257	1.09661	1.03482
614	1.10147	1.1196	1.07776	1.07328	1.07575	1.07168	1.06195	1.0491	1.05884	1.02832	1.05214	1.03822	1.02417	1.02877	1.02672	1.0249	1.10363	1.09837	1.03636
615	1.10273	1.1196	1.07858	1.07418	1.07591	1.07271	1.06314	1.05026	1.05934	1.02881	1.05241	1.03866	1.0255	1.02948	1.02735	1.02563	1.10478	1.09898	1.03744
616	1.10109	1.11856	1.07872	1.07382	1.0759	1.07215	1.06289	1.05011	1.05889	1.02864	1.05248	1.03877	1.0251	1.02958	1.02749	1.02538	1.10417	1.09845	1.03745
617	1.10026	1.11641	1.07757	1.07259	1.0747	1.07143	1.06191	1.04898	1.05828	1.02805	1.05218	1.03817	1.0243	1.02892	1.02622	1.02547	1.10346	1.09816	1.03693
618	1.09826	1.11455	1.0767	1.07142	1.07315	1.07065	1.06061	1.04781	1.05676	1.02751	1.0511	1.03671	1.02323	1.02767	1.02525	1.02442	1.10292	1.09708	1.03557
619	1.0963	1.11179	1.07482	1.06969	1.071	1.06881	1.05934	1.04689	1.0555	1.02637	1.04967	1.03542	1.02194	1.02663	1.024	1.02327	1.10117	1.09611	1.03447
620	1.09429	1.10906	1.07376	1.06801	1.06945	1.06759	1.05786	1.04491	1.05353	1.02487	1.04839	1.03404	1.02081	1.02497	1.02282	1.02205	1.09975	1.09532	1.03337
621	1.09285	1.10746	1.0722	1.0664	1.06822	1.06608	1.05646	1.04419	1.05249	1.02431	1.04762	1.0333	1.01991	1.0243	1.0217	1.02136	1.09878	1.09489	1.03256
622	1.09199	1.10545	1.0716	1.06554	1.0677	1.06527	1.05569	1.04315	1.05176	1.02346	1.04698	1.03296	1.01943	1.02368	1.02104	1.02136	1.09879	1.09443	1.03194
623	1.09143	1.10534	1.07151	1.0648	1.06717	1.06548	1.05589	1.04324	1.05148	1.02376	1.04763	1.03279	1.01927	1.0237	1.02086	1.02178	1.09844	1.09454	1.03183
624	1.09271	1.10497	1.07243	1.06596	1.06799	1.06626	1.05709	1.04425	1.0521	1.02483	1.04783	1.03383	1.02054	1.02458	1.02162	1.02288	1.09904	1.09518	1.03297
625	1.09512	1.10697	1.07458	1.06728	1.06936	1.06763	1.05902	1.04615	1.05384	1.02664	1.04981	1.03556	1.02203	1.02666	1.02377	1.02492	1.10083	1.09671	1.03513
626	1.098	1.1097	1.07754	1.07047	1.07237	1.07073	1.0618	1.04917	1.05649	1.0299	1.05304	1.03835	1.02487	1.02961	1.02636	1.02766	1.1038	1.09917	1.03785
627	1.10304	1.11378	1.08221	1.07482	1.07621	1.07486	1.06594	1.0535	1.06108	1.0342	1.0575	1.0424	1.02924	1.03345	1.03053	1.03162	1.10699	1.10316	1.04181
628	1.10914	1.11924	1.088	1.07987	1.08195	1.08025	1.07112	1.05877	1.06575	1.03957	1.06296	1.04753	1.03465	1.03914	1.03549	1.03777	1.11162	1.10785	1.0472
629	1.11755	1.12662	1.09477	1.08765	1.08843	1.08785	1.07828	1.06546	1.07229	1.04663	1.06931	1.05442	1.04159	1.04595	1.04172	1.04466	1.11774	1.11453	1.0539
630	1.1273	1.13563	1.10427	1.09616	1.09744	1.0964	1.08703	1.07408	1.08149	1.05531	1.07853	1.06233	1.0495	1.05366	1.04977	1.0527	1.12464	1.12175	1.06248
631	1.14013	1.14701	1.11572	1.10689	1.10799	1.10723	1.09688	1.08471	1.09096	1.0654	1.08745	1.07156	1.05924	1.06352	1.05939	1.06243	1.1336	1.13091	1.07238
632	1.15474	1.15918	1.12791	1.119	1.12041	1.11894	1.1084	1.0959	1.10272	1.07701	1.09977	1.08295	1.06942	1.07392	1.07023	1.07279	1.14348	1.14086	1.08362
633	1.17014	1.17382	1.1415	1.13228	1.13286	1.13211	1.12172	1.10907	1.11519	1.08971	1.11232	1.09574	1.08197	1.08656	1.08263	1.08526	1.15417	1.15247	1.09619
634	1.18751	1.18951	1.15695	1.14729	1.14798	1.14609	1.13642	1.12338	1.12894	1.1043	1.1264	1.10932	1.09533	1.10008	1.09634	1.09928	1.16553	1.16458	1.10999
635	1.2071	1.20681	1.17362	1.16303	1.16399	1.1633	1.15136	1.13904	1.14465	1.12029	1.14122	1.12432	1.10989	1.114	1.11039	1.11321	1.17917	1.17717	1.12476
636	1.22795	1.22638	1.19148	1.18151	1.18069	1.18081	1.16709	1.15588	1.16072	1.13676	1.15749	1.14044	1.12583	1.13028	1.12593	1.12943	1.19366	1.19279	1.14105
637	1.25038	1.24641	1.21111	1.20079	1.1999	1.19922	1.18632	1.17364	1.17859	1.15475	1.17552	1.15713	1.14254	1.14711	1.14256	1.14678	1.20902	1.20825	1.15885
638	1.27478	1.26924	1.23192	1.22097	1.22015	1.21926	1.20511	1.19344	1.19806	1.17355	1.19527	1.17557	1.16029	1.16518	1.16077	1.16451	1.22526	1.22411	1.17719
639	1.30196	1.29298	1.25429	1.24234	1.24126	1.24022	1.22521	1.21332	1.21767	1.19386	1.21463	1.19501	1.18018	1.18471	1.17922	1.18324	1.24254	1.24158	1.19719
640	1.32912	1.31718	1.27788	1.26605	1.26412	1.26336	1.24665	1.23566	1.23934	1.21541	1.23586	1.21607	1.20103	1.20541	1.1994	1.20329	1.26089	1.26105	1.21787
641	1.35895	1.34359	1.30234	1.28951	1.28812	1.28618	1.26978	1.25817	1.26208	1.23808	1.25815	1.23812	1.22168	1.22728	1.22134	1.22497	1.28073	1.27963	1.24002
642	1.39045	1.37143	1.32925	1.31667	1.31436	1.31216	1.29532	1.28258	1.28685	1.26359	1.28224	1.26104	1.2453	1.24874	1.24316	1.24669	1.30104	1.29986	1.26283
643	1.42567	1.40069	1.35644	1.34328	1.3398	1.33778	1.31965	1.30767	1.3108	1.28813	1.30531	1.28496	1.2681	1.27238	1.26585	1.27076	1.32162	1.32094	1.28688
644	1.45933	1.43069	1.38406	1.37019	1.36639	1.36423	1.34482	1.33343	1.33567	1.31333	1.33055	1.30888	1.29205	1.29673	1.29005	1.29355	1.34246	1.34267	1.31122
645	1.49336	1.4608	1.41203	1.39672	1.39258	1.39045	1.36907	1.35913	1.36012	1.33889	1.35554	1.3338	1.31559	1.32033	1.31278	1.31596	1.3626	1.3631	1.33572
646	1.52784	1.49099	1.43901	1.42364	1.4196	1.41689	1.39432	1.38528	1.38416	1.36498	1.37962	1.35627	1.3394	1.34318	1.335	1.33946	1.38263	1.38354	1.35945
647	1.5631	1.51984	1.46607	1.44983	1.44627	1.44194	1.41751	1.40917	1.40769	1.38812	1.40284	1.37881	1.36201	1.36622	1.35788	1.36098	1.40293	1.40397	1.38318
648	1.59874	1.5504	1.49478	1.47655	1.47158	1.46796	1.44152	1.43432	1.43197	1.41429	1.42646	1.40129	1.38431	1.38842	1.38069	1.38266	1.4241	1.42398	1.40494
649	1.63364	1.57766	1.51927	1.50301	1.49865	1.49361	1.46597	1.45741	1.4548	1.43746	1.44955	1.42379	1.40589	1.41049	1.40213	1.40449	1.44289	1.44275	1.42797
650	1.66944	1.60583	1.54696	1.52753	1.52208	1.51741	1.48997	1.48113	1.4778	1.46096	1.47011	1.44538	1.42662	1.43011	1.42232	1.42343	1.46128	1.46202	1.44955
651	1.70258	1.63341	1.57102	1.5509	1.54689	1.53925	1.51171	1.50249	1.49928	1.48371	1.49189	1.46596	1.44623	1.45151	1.44166	1.4444	1.47887	1.47987	1.46946
652	1.73576	1.65889	1.59745	1.57415	1.5687	1.56257	1.53239	1.52406	1.5185	1.50421	1.51455	1.48613	1.46575	1.46989	1.46085	1.46307	1.49715	1.49744	1.49099
653	1.76784	1.68575	1.62095	1.59741	1.59113	1.58269	1.55269	1.54383	1.53949	1.52524	1.53411	1.50448	1.4858	1.48799	1.47792	1.48226	1.51373	1.51505	1.50923
654	1.80241	1.71169	1.64455	1.62041	1.61267	1.60486	1.57173	1.56597	1.55709	1.54654	1.55234	1.52277	1.50306	1.50724	1.49578	1.49962	1.52943	1.53113	1.52921
655	1.83406	1.73417	1.6658	1.64309	1.63443	1.62504	1.59295	1.58329	1.57635	1.56425	1.57049	1.54164	1.52013	1.52302	1.51382	1.51611	1.54523	1.54648	1.5459
656	1.86533	1.75688	1.68594	1.6609	1.65234	1.64412	1.60819	1.60043	1.59327	1.58323	1.58681	1.5581	1.53551	1.53902	1.52933	1.53117	1.55931	1.55966	1.56162
657	1.89247	1.77624	1.70465	1.679	1.67053	1.66155	1.62376	1.61657	1.60867	1.59917	1.60174	1.57161	1.54904	1.55356	1.54314	1.54585	1.57148	1.5738	1.57686
658	1.91732	1.79282	1.71828	1.69508	1.68595	1.67479	1.63723	1.6302	1.62185	1.61258	1.61408	1.58603	1.56301	1.56726	1.5566	1.55779	1.58166	1.58402	1.59123
659	1.938	1.80901	1.73211	1.70863	1.70008	1.68887	1.65072	1.64278	1.63385	1.62607	1.62519	1.59513	1.57448	1.57666	1.56698	1.57099	1.59037	1.5923	1.60281
660	1.95796	1.82242	1.74618	1.72175	1.70982	1.70074	1.65966	1.65464	1.64201	1.63512	1.63622	1.60468	1.582	1.58531	1.5756	1.57788	1.59901	1.59872	1.61096
661	1.97095	1.8339	1.75548	1.72883	1.71747	1.70722	1.66753	1.66228	1.65073	1.64426	1.64302	1.61242	1.58921	1.59249	1.58187	1.58415	1.60489	1.60483	1.61731
662	1.98108	1.83773	1.76238	1.73289	1.7245	1.71369	1.67097	1.6672	1.65453	1.64991	1.64698	1.61681	1.59346	1.59713	1.58664	1.58905	1.60704	1.60968	1.62135
663	1.98492	1.83777	1.7617	1.73626	1.72608	1.71553	1.67291	1.66795	1.65664	1.65163	1.64876	1.61824	1.5944	1.59831	1.58687	1.58959	1.60844	1.61007	1.62347
664	1.97792	1.83378	1.75999	1.73588	1.72317	1.71294	1.67129	1.66781	1.65525	1.64858	1.64585	1.61687	1.59336	1.59694	1.58557	1.5874	1.60624	1.60899	1.61992
665	1.96321	1.82652	1.75146	1.72711	1.71672	1.70508	1.66479	1.65838	1.64872	1.64318	1.64272	1.61111	1.58891	1.59174	1.58091	1.58311	1.60172	1.60364	1.61657
666	1.94214	1.81195	1.73958	1.71248	1.70388	1.69294	1.65387	1.64836	1.6388	1.6313	1.63048	1.60037	1.57939	1.58232	1.56884	1.57241	1.59239	1.59476	1.60561
667	1.91018	1.78872	1.71606	1.69326	1.68475	1.676	1.63796	1.63125	1.62231	1.61353	1.61229	1.5837	1.56267	1.5668	1.55314	1.55683	1.57847	1.58028	1.59166
668	1.86928	1.75599	1.68925	1.66921	1.65873	1.65116	1.61395	1.60881	1.60002	1.59011	1.59352	1.56363	1.54266	1.54703	1.53373	1.53774	1.56129	1.56136	1.56946
669	1.81734	1.71901	1.65562	1.63717	1.62707	1.61933	1.5865	1.57921	1.57347	1.55915	1.56556	1.53565	1.51655	1.52041	1.50927	1.51382	1.53822	1.53783	1.5433
670	1.76151	1.67578	1.61548	1.59712	1.58817	1.58188	1.55198	1.54489	1.54058	1.52556	1.53476	1.50564	1.48587	1.49026	1.48078	1.48317	1.50975	1.51015	1.51019
671	1.69679	1.62346	1.5702	1.55231	1.54662	1.53958	1.51205	1.50602	1.50042	1.48494	1.49599	1.46825	1.44906	1.45328	1.44339	1.44749	1.47734	1.47657	1.47296
672	1.62798	1.56785	1.51936	1.50181	1.49717	1.49341	1.46857	1.45788	1.45618	1.43901	1.44982	1.42547	1.40617	1.41081	1.40232	1.40698	1.43889	1.43898	1.43028
673	1.55584	1.50629	1.46382	1.44747	1.44091	1.43942	1.41708	1.40803	1.4062	1.38741	1.4026	1.37814	1.36032	1.36521	1.35782	1.36152	1.39719	1.39615	1.38278
674	1.47631	1.43948	1.40204	1.38738	1.3836	1.38143	1.36294	1.35289	1.35231	1.33249	1.35037	1.32627	1.30943	1.31447	1.30578	1.31042	1.35054	1.34924	1.33088
675	1.39555	1.36998	1.33808	1.32501	1.31968	1.31997	1.30522	1.29344	1.29458	1.27369	1.29138	1.27016	1.25419	1.25865	1.25073	1.25702	1.30003	1.29964	1.27302
676	1.31454	1.2968	1.271	1.258	1.2547	1.25534	1.24244	1.23048	1.23318	1.21019	1.23108	1.2108	1.19497	1.19989	1.19335	1.19989	1.24781	1.24634	1.21292
677	1.23163	1.22082	1.19989	1.18782	1.18521	1.18677	1.17664	1.16359	1.16759	1.14494	1.16675	1.146	1.13341	1.13829	1.13185	1.13827	1.19059	1.18863	1.15094
678	1.14798	1.14289	1.12772	1.11609	1.11513	1.11688	1.11007	1.09652	1.10063	1.07798	1.10113	1.08074	1.06912	1.07402	1.06753	1.07407	1.13126	1.12922	1.08587
679	1.06507	1.06571	1.05567	1.04555	1.04512	1.04713	1.04073	1.02726	1.03254	1.01056	1.03248	1.01439	1.00296	1.00888	1.00281	1.00897	1.07063	1.06859	1.01871
680	0.98612	0.988868	0.984298	0.974735	0.975352	0.977309	0.972506	0.959249	0.964655	0.943611	0.965514	0.94858	0.938565	0.943644	0.938417	0.945634	1.0108	1.00919	0.952507
681	0.910343	0.915081	0.91523	0.905614	0.905506	0.909469	0.907015	0.893873	0.899599	0.878242	0.901643	0.885808	0.876154	0.881355	0.875724	0.883721	0.953239	0.951792	0.888872
682	0.837649	0.844774	0.849544	0.840649	0.840991	0.845559	0.844614	0.83221	0.837485	0.816714	0.84042	0.824123	0.815849	0.820155	0.81524	0.823176	0.897104	0.895032	0.828403
683	0.769225	0.779645	0.787713	0.779962	0.78115	0.785387	0.784636	0.772547	0.777909	0.758204	0.780734	0.766186	0.758266	0.763483	0.758441	0.765807	0.844133	0.842031	0.769859
684	0.705914	0.717708	0.729062	0.721756	0.72354	0.72742	0.727822	0.716058	0.72121	0.702332	0.725136	0.711003	0.704243	0.708255	0.704636	0.712113	0.793576	0.791596	0.714565
685	0.645789	0.658781	0.673679	0.666852	0.668841	0.672909	0.674385	0.662831	0.668519	0.649836	0.672492	0.659306	0.653129	0.657475	0.654012	0.660975	0.745786	0.743489	0.662942
686	0.588949	0.603814	0.621814	0.615423	0.618554	0.622088	0.624968	0.612824	0.618665	0.600966	0.623501	0.610597	0.605482	0.609222	0.605835	0.612923	0.700689	0.698362	0.614092
687	0.536435	0.552589	0.573915	0.567674	0.571262	0.574885	0.577917	0.566571	0.572252	0.55519	0.577255	0.56483	0.559908	0.564345	0.560818	0.567658	0.658593	0.655906	0.567891
688	0.4883	0.504685	0.528417	0.522742	0.526706	0.529932	0.533786	0.522568	0.52824	0.511966	0.533138	0.521506	0.517512	0.521704	0.518638	0.525814	0.619891	0.617103	0.524608
689	0.44369	0.459733	0.485962	0.480874	0.484659	0.488717	0.492963	0.481947	0.487497	0.47182	0.492505	0.481892	0.478143	0.482307	0.479692	0.486342	0.582658	0.579957	0.485108
690	0.401431	0.418101	0.44677	0.441977	0.446266	0.450212	0.454793	0.444072	0.449734	0.434623	0.455204	0.444321	0.441012	0.445136	0.442244	0.44887	0.547368	0.544445	0.448234
691	0.363153	0.380415	0.411491	0.406796	0.41137	0.41531	0.419813	0.409232	0.414703	0.400311	0.420102	0.410351	0.406972	0.411481	0.408771	0.41553	0.516458	0.513498	0.413502
692	0.329604	0.346423	0.378584	0.37437	0.379268	0.383104	0.388402	0.377847	0.383102	0.369585	0.38885	0.379799	0.376926	0.381132	0.378833	0.3853	0.488094	0.485336	0.383022
693	0.298832	0.315252	0.349058	0.34559	0.350766	0.354173	0.360296	0.349984	0.355675	0.342008	0.361332	0.352297	0.350001	0.353864	0.352026	0.358158	0.462528	0.459552	0.355644
694	0.271037	0.288001	0.323519	0.320294	0.325309	0.329244	0.335152	0.325198	0.330836	0.317605	0.336058	0.32758	0.32565	0.329543	0.327624	0.333714	0.439458	0.436659	0.330767
695	0.246625	0.263497	0.30008	0.297301	0.30225	0.306044	0.312306	0.302088	0.307844	0.295124	0.313226	0.304911	0.303305	0.307169	0.305513	0.311532	0.418767	0.415306	0.308111
696	0.224694	0.241234	0.278826	0.276544	0.281615	0.285704	0.291735	0.281857	0.287533	0.275058	0.292943	0.285084	0.283946	0.287539	0.286064	0.292102	0.400077	0.396721	0.288159
697	0.204405	0.221068	0.259964	0.257718	0.262958	0.267005	0.273396	0.263576	0.269277	0.256956	0.27481	0.267276	0.266097	0.269703	0.268318	0.273977	0.38336	0.379956	0.27039
698	0.186234	0.203395	0.242943	0.240802	0.246489	0.25046	0.256851	0.247297	0.252638	0.240891	0.258258	0.251001	0.250329	0.253662	0.252348	0.257802	0.368318	0.364726	0.25421
699	0.170151	0.186837	0.227435	0.225502	0.231224	0.235176	0.241652	0.231952	0.237629	0.226006	0.243194	0.236	0.235742	0.23894	0.237624	0.243198	0.354473	0.350828	0.239128
700	0.155598	0.171829	0.213284	0.21161	0.217281	0.221234	0.227686	0.218349	0.223809	0.212554	0.229517	0.222764	0.222432	0.225748	0.224591	0.229921	0.341925	0.338396	0.225769
701	0.14214	0.158112	0.200345	0.19899	0.204699	0.20867	0.215078	0.206033	0.211635	0.200432	0.217153	0.210699	0.210693	0.213862	0.212682	0.217851	0.330486	0.326895	0.213818
702	0.129811	0.145976	0.188828	0.18762	0.193509	0.197296	0.203851	0.195	0.200377	0.189652	0.205931	0.19943	0.199602	0.202566	0.201481	0.206778	0.320024	0.316261	0.202518
703	0.118916	0.134913	0.178206	0.177246	0.183223	0.186977	0.193566	0.184693	0.190216	0.17941	0.195563	0.189493	0.1897	0.192684	0.191735	0.196906	0.310572	0.306875	0.192324
704	0.109254	0.125053	0.168686	0.167991	0.174023	0.177752	0.184226	0.175532	0.180917	0.170479	0.186462	0.180589	0.180871	0.183876	0.183052	0.188135	0.302219	0.298393	0.183309
705	0.100567	0.116158	0.160254	0.159768	0.165713	0.169394	0.176188	0.167493	0.17277	0.162614	0.178426	0.17268	0.173085	0.176021	0.175182	0.180221	0.294682	0.290864	0.175522
706	0.092563	0.108211	0.152794	0.152588	0.15844	0.162199	0.169	0.160405	0.165446	0.155633	0.171253	0.165539	0.166055	0.168962	0.168101	0.173108	0.287875	0.283977	0.168234
707	0.08579	0.101167	0.146033	0.145927	0.151755	0.155537	0.162356	0.153812	0.158883	0.14921	0.164708	0.158917	0.159769	0.162591	0.161793	0.166715	0.281907	0.277721	0.161857
708	0.079516	0.094611	0.139834	0.139814	0.14576	0.149342	0.156405	0.14793	0.152934	0.143455	0.158662	0.153097	0.153917	0.156667	0.156037	0.161098	0.276378	0.272241	0.155955
709	0.073799	0.088803	0.134323	0.134456	0.140295	0.14396	0.151057	0.142626	0.14761	0.138263	0.153424	0.147998	0.148702	0.151581	0.150877	0.155919	0.271264	0.267214	0.150799
710	0.068783	0.083629	0.12942	0.129594	0.135431	0.139236	0.146284	0.137896	0.142828	0.133634	0.148647	0.143166	0.144154	0.146929	0.14622	0.151244	0.266643	0.2627	0.145951
711	0.064152	0.078802	0.124892	0.12531	0.131015	0.134869	0.141866	0.133425	0.13846	0.12927	0.144264	0.138817	0.139861	0.142545	0.141933	0.146966	0.262549	0.258544	0.14168
712	0.059976	0.074278	0.120712	0.12103	0.126964	0.130705	0.137779	0.129309	0.134357	0.125262	0.140236	0.134743	0.136046	0.138586	0.138	0.14307	0.258576	0.254606	0.137701
713	0.055902	0.070217	0.116778	0.117162	0.123344	0.126921	0.134009	0.125636	0.130595	0.121749	0.136535	0.130984	0.132459	0.134971	0.134312	0.139469	0.255082	0.251161	0.134017
714	0.05247	0.066494	0.113352	0.113675	0.119908	0.123425	0.130624	0.122305	0.127027	0.118412	0.133067	0.127726	0.129056	0.131581	0.130943	0.136186	0.25177	0.247938	0.130606
715	0.049197	0.063032	0.110083	0.110435	0.116623	0.1202	0.127298	0.11913	0.123794	0.115166	0.129854	0.124501	0.125922	0.128436	0.127838	0.133166	0.248661	0.24462	0.127462
716	0.046214	0.060056	0.107301	0.107746	0.113833	0.117433	0.124601	0.116409	0.121219	0.112517	0.12703	0.121783	0.123363	0.125732	0.125239	0.13072	0.245903	0.242062	0.124876
717	0.043515	0.057206	0.104662	0.105112	0.11115	0.114712	0.121994	0.113856	0.118613	0.109911	0.124539	0.119239	0.120778	0.12318	0.122622	0.128239	0.243361	0.239487	0.122323
718	0.040963	0.054616	0.102263	0.102661	0.108757	0.11235	0.119565	0.111494	0.11607	0.107691	0.122217	0.116792	0.118358	0.120803	0.120245	0.126078	0.241086	0.237128	0.119853
719	0.038896	0.052166	0.100037	0.100492	0.106624	0.110011	0.11725	0.109288	0.113799	0.10553	0.119857	0.114533	0.116204	0.118705	0.118048	0.123983	0.238838	0.234978	0.117693
720	0.036773	0.049873	0.098108	0.098414	0.104661	0.108042	0.115192	0.107308	0.111944	0.103725	0.117811	0.112429	0.114272	0.116708	0.116136	0.122146	0.236885	0.232957	0.115852
721	0.034922	0.047769	0.0962	0.096481	0.102777	0.106082	0.113204	0.105296	0.109931	0.101793	0.115836	0.110456	0.11241	0.114848	0.114199	0.120312	0.234798	0.231065	0.113899
722	0.033204	0.045917	0.094612	0.094769	0.101044	0.104431	0.111443	0.103742	0.108186	0.100094	0.114175	0.108801	0.110615	0.11315	0.112484	0.118697	0.233018	0.229218	0.112278
723	0.031353	0.044118	0.092924	0.093113	0.099412	0.102794	0.109773	0.102053	0.106588	0.098496	0.112533	0.107183	0.109017	0.111522	0.110858	0.117154	0.231302	0.227487	0.110694
724	0.02985	0.042457	0.091503	0.091585	0.097863	0.101315	0.108257	0.10057	0.104997	0.097083	0.111013	0.10569	0.107616	0.110114	0.109456	0.115722	0.22978	0.226004	0.109248
725	0.028366	0.040789	0.090069	0.089986	0.096372	0.09987	0.106791	0.099053	0.103468	0.095637	0.109533	0.10411	0.106117	0.108708	0.107985	0.11423	0.228233	0.224531	0.10774
726	0.027018	0.039334	0.088765	0.088661	0.095017	0.0985	0.105464	0.097819	0.102058	0.094341	0.108243	0.1028	0.104851	0.107422	0.106644	0.112989	0.226747	0.223189	0.10645
727	0.025786	0.037951	0.087517	0.087424	0.093725	0.097206	0.104115	0.096489	0.100767	0.092987	0.106825	0.101492	0.103537	0.106138	0.105404	0.111732	0.225361	0.221827	0.105212
728	0.024665	0.036606	0.086314	0.086312	0.092458	0.095961	0.102925	0.095404	0.099529	0.091987	0.105684	0.10037	0.102417	0.104898	0.104301	0.110492	0.224106	0.220641	0.104076
729	0.023396	0.03542	0.085192	0.085205	0.091348	0.094919	0.101938	0.094304	0.098518	0.090827	0.104502	0.099196	0.101266	0.103828	0.103177	0.109442	0.222873	0.219483	0.102927
730	0.022283	0.034251	0.084064	0.084098	0.090376	0.093673	0.100846	0.093205	0.097391	0.089839	0.103484	0.098112	0.100096	0.102702	0.102082	0.108302	0.221712	0.218381	0.101874
731	0.021512	0.033008	0.083044	0.083022	0.089334	0.092654	0.099742	0.092126	0.096305	0.088723	0.102322	0.097155	0.098961	0.101673	0.10116	0.107168	0.220588	0.217285	0.100851
732	0.020504	0.032094	0.082155	0.082144	0.08846	0.091752	0.098866	0.09129	0.095444	0.087918	0.101463	0.096226	0.097937	0.100716	0.100029	0.106312	0.219562	0.216334	0.100075
733	0.01958	0.031176	0.081347	0.081202	0.087552	0.090929	0.097981	0.090472	0.094605	0.08711	0.100459	0.095315	0.097165	0.099812	0.099159	0.105423	0.218508	0.215442	0.09911
734	0.018713	0.030189	0.080449	0.080347	0.08669	0.089991	0.097036	0.089519	0.093793	0.086242	0.099662	0.094406	0.096334	0.099011	0.098341	0.104538	0.217481	0.214541	0.098254
735	0.017979	0.02917	0.079709	0.079623	0.085991	0.08915	0.096298	0.088758	0.092909	0.085494	0.098825	0.093599	0.095501	0.098226	0.09755	0.103661	0.216681	0.213835	0.097456
736	0.017377	0.028282	0.078907	0.07873	0.085066	0.088394	0.095545	0.088005	0.092092	0.084645	0.098045	0.092908	0.094838	0.097386	0.096712	0.102777	0.2158	0.212855	0.096706
737	0.01658	0.02744	0.078121	0.077947	0.084315	0.087627	0.094769	0.087192	0.091397	0.083951	0.097323	0.092115	0.09404	0.096577	0.096052	0.101985	0.214892	0.212057	0.096014
738	0.015802	0.0266	0.077442	0.077238	0.083644	0.08692	0.093947	0.086549	0.090619	0.083356	0.096578	0.09142	0.09322	0.095965	0.095371	0.101315	0.214094	0.211212	0.095277
739	0.015214	0.025923	0.076825	0.076584	0.083036	0.086282	0.093322	0.086139	0.090184	0.082733	0.095848	0.090778	0.092685	0.095202	0.094687	0.1007	0.213392	0.210383	0.094733
740	0.014622	0.025333	0.076271	0.076001	0.082512	0.085716	0.092929	0.085667	0.089604	0.08227	0.095358	0.090281	0.092171	0.094682	0.094252	0.100195	0.212664	0.209652	0.094007
741	0.01418	0.024459	0.075459	0.075348	0.081769	0.085013	0.092125	0.084891	0.088897	0.081469	0.094641	0.08945	0.091295	0.093927	0.093468	0.099431	0.211729	0.20873	0.093379
742	0.013536	0.023908	0.074941	0.074749	0.081253	0.08445	0.091681	0.084374	0.088285	0.080997	0.094059	0.089	0.090835	0.093392	0.093038	0.098815	0.210913	0.208146	0.092881
743	0.012909	0.023352	0.074434	0.07416	0.080719	0.083954	0.091088	0.083841	0.087676	0.080525	0.09351	0.088457	0.090451	0.092891	0.092524	0.098278	0.210294	0.207479	0.092322
744	0.012399	0.022761	0.073971	0.073675	0.080309	0.08347	0.090695	0.083513	0.087311	0.080068	0.093055	0.088147	0.090114	0.092468	0.092066	0.097701	0.209793	0.206897	0.091858
745	0.011938	0.022207	0.07352	0.073177	0.07972	0.082921	0.090162	0.083006	0.086766	0.07958	0.092575	0.08765	0.089678	0.091976	0.091457	0.097258	0.209115	0.206236	0.091305
746	0.011542	0.021704	0.073104	0.072742	0.079316	0.08251	0.089744	0.082617	0.086343	0.079183	0.092096	0.087213	0.089244	0.091464	0.091134	0.096968	0.208577	0.205697	0.090909
747	0.011012	0.021089	0.072594	0.072309	0.078789	0.082066	0.089323	0.082172	0.085815	0.07877	0.091632	0.086835	0.088691	0.091025	0.090673	0.096332	0.208063	0.205116	0.090521
748	0.010607	0.020595	0.072184	0.071879	0.078486	0.081757	0.088934	0.081814	0.085407	0.078414	0.091295	0.086307	0.088353	0.090646	0.090317	0.095837	0.207502	0.204563	0.090179
749	0.010222	0.020146	0.071854	0.071421	0.078114	0.081234	0.088485	0.081606	0.08501	0.077947	0.090856	0.085945	0.087986	0.090196	0.089806	0.095307	0.207172	0.204016	0.08969
750	0.009737	0.019704	0.071468	0.070973	0.07758	0.080983	0.088238	0.081285	0.084717	0.077609	0.09047	0.085512	0.087548	0.089845	0.089537	0.094977	0.206805	0.203436	0.089347
751	0.009371	0.019363	0.071121	0.070783	0.077257	0.08061	0.08792	0.080951	0.084446	0.077245	0.090242	0.085148	0.087246	0.089562	0.089246	0.094596	0.206365	0.203027	0.088963
752	0.009103	0.018919	0.070709	0.070416	0.076948	0.080251	0.087553	0.080649	0.084045	0.076842	0.089824	0.084931	0.086986	0.089153	0.088945	0.09419	0.205736	0.202569	0.088616
753	0.008828	0.01845	0.070228	0.069921	0.076362	0.079907	0.087201	0.08025	0.083578	0.076495	0.089425	0.084539	0.086684	0.088769	0.088483	0.093757	0.205218	0.201894	0.088236
754	0.008597	0.018113	0.069931	0.069616	0.076172	0.07956	0.086933	0.080019	0.083238	0.076151	0.089102	0.084229	0.086292	0.088495	0.088096	0.093421	0.204715	0.201462	0.087816
755	0.008323	0.017816	0.069663	0.069325	0.075955	0.079353	0.086572	0.079785	0.082986	0.07598	0.088862	0.083997	0.086035	0.088122	0.08773	0.093163	0.204367	0.200889	0.087451
756	0.007818	0.017347	0.069471	0.069059	0.075718	0.079043	0.086349	0.079519	0.082738	0.075651	0.088472	0.083746	0.085835	0.087904	0.087384	0.092789	0.204075	0.200512	0.087101
757	0.007638	0.017045	0.069233	0.068723	0.075338	0.078703	0.085873	0.079275	0.082367	0.075542	0.088157	0.083469	0.085506	0.087613	0.087085	0.092451	0.203711	0.199928	0.086781
758	0.007485	0.016901	0.06911	0.068629	0.075317	0.07873	0.085627	0.079157	0.082386	0.075494	0.088151	0.083331	0.085391	0.087614	0.087189	0.092326	0.20354	0.199815	0.086633
759	0.007141	0.01647	0.068726	0.068138	0.074763	0.078271	0.085274	0.078769	0.08194	0.075121	0.087632	0.082954	0.085009	0.087182	0.086805	0.091913	0.202999	0.199094	0.086228
760	0.006873	0.016273	0.068684	0.06808	0.074662	0.078011	0.085129	0.078424	0.08183	0.074931	0.087438	0.082773	0.08489	0.087007	0.086483	0.091706	0.202685	0.198876	0.085956
761	0.006627	0.015828	0.068286	0.067747	0.074406	0.077631	0.084787	0.078198	0.08156	0.074623	0.087086	0.08254	0.084664	0.086641	0.086204	0.091464	0.20234	0.198423	0.085609
762	0.006354	0.015576	0.067994	0.067561	0.074188	0.077439	0.084684	0.077987	0.081417	0.074471	0.086925	0.082295	0.084382	0.086372	0.086053	0.091179	0.202015	0.19811	0.085404
763	0.006232	0.015369	0.067739	0.067156	0.073971	0.077154	0.084451	0.077686	0.081101	0.07417	0.086632	0.082092	0.084163	0.086136	0.085804	0.090817	0.201584	0.197664	0.085239
764	0.006079	0.014917	0.067474	0.066964	0.073912	0.0769	0.084045	0.07754	0.080796	0.073767	0.086375	0.081903	0.083986	0.085881	0.085517	0.090271	0.201243	0.197303	0.084998
765	0.005949	0.014687	0.067205	0.066716	0.073622	0.076596	0.083825	0.077344	0.080681	0.073767	0.086028	0.081613	0.083702	0.085775	0.085294	0.09008	0.20098	0.196947	0.084688
766	0.005693	0.014627	0.067054	0.066605	0.07345	0.076533	0.083705	0.077323	0.080446	0.073583	0.085912	0.081551	0.083615	0.085537	0.08527	0.089876	0.200763	0.196708	0.084524
767	0.00546	0.014475	0.066881	0.066346	0.073183	0.076276	0.083467	0.077047	0.080376	0.073373	0.08572	0.081196	0.08346	0.08519	0.085021	0.089597	0.20046	0.196356	0.084202
768	0.005232	0.014187	0.066576	0.066038	0.07293	0.076036	0.083503	0.076896	0.080042	0.073234	0.085503	0.080983	0.083226	0.085067	0.084815	0.089482	0.200231	0.19609	0.084054
769	0.005054	0.014106	0.066536	0.066041	0.072843	0.075965	0.083469	0.076858	0.079857	0.073152	0.085394	0.080903	0.083078	0.084926	0.08465	0.089255	0.200001	0.195878	0.083907
770	0.00489	0.013933	0.066373	0.066023	0.072628	0.075781	0.083292	0.076861	0.079697	0.073073	0.085352	0.080746	0.083	0.084828	0.084509	0.088983	0.199702	0.19542	0.083651
771	0.004731	0.013593	0.065945	0.06593	0.072262	0.075491	0.083053	0.076523	0.079503	0.07273	0.085093	0.080702	0.082714	0.084572	0.084262	0.088694	0.199427	0.195036	0.083481
772	0.004662	0.013507	0.065944	0.065869	0.072298	0.075536	0.083085	0.076494	0.0795	0.072769	0.084966	0.080502	0.082673	0.084354	0.084193	0.088679	0.199247	0.194832	0.083349
773	0.004412	0.013427	0.06583	0.065828	0.072288	0.075443	0.082872	0.076394	0.07936	0.072571	0.084928	0.08041	0.082681	0.084165	0.084128	0.088516	0.198967	0.194671	0.083217
774	0.004514	0.01306	0.065515	0.065515	0.071948	0.075196	0.082571	0.076237	0.079096	0.072258	0.084545	0.080172	0.082292	0.083806	0.083836	0.088259	0.198579	0.194306	0.082884
775	0.004278	0.012995	0.06548	0.065378	0.071888	0.075028	0.082577	0.075981	0.079105	0.072194	0.084497	0.080103	0.08229	0.083716	0.083722	0.088076	0.198281	0.194161	0.08274
776	0.004093	0.012711	0.065317	0.06521	0.071693	0.074834	0.082313	0.075899	0.078888	0.072134	0.084307	0.079852	0.082064	0.083521	0.083495	0.087849	0.198136	0.193831	0.0826
777	0.003949	0.012541	0.065243	0.065045	0.071678	0.074695	0.082236	0.075737	0.078815	0.071969	0.084174	0.07977	0.0819	0.083507	0.083297	0.087857	0.197855	0.193778	0.082405
778	0.004086	0.012458	0.065147	0.064905	0.071461	0.074611	0.08218	0.075543	0.07874	0.071859	0.084175	0.079697	0.081773	0.083207	0.0832	0.087736	0.197576	0.193545	0.082412
779	0.003958	0.012166	0.064867	0.064725	0.071302	0.074567	0.081922	0.075439	0.078705	0.071558	0.083905	0.07953	0.081596	0.083059	0.083003	0.087625	0.197352	0.193047	0.082204
780	0.003913	0.012032	0.06477	0.064551	0.071092	0.074292	0.081673	0.075289	0.078496	0.07118	0.083803	0.079296	0.081319	0.082822	0.082755	0.08744	0.196945	0.19261	0.081868
781	0.003727	0.012023	0.064581	0.064504	0.071081	0.074251	0.081648	0.075193	0.078537	0.071135	0.083793	0.079308	0.081284	0.082856	0.082704	0.087436	0.196841	0.192588	0.081803
782	0.003666	0.012025	0.064758	0.064567	0.071111	0.074225	0.081708	0.075198	0.078629	0.071036	0.083704	0.07924	0.081315	0.082842	0.082832	0.087463	0.196784	0.192504	0.081852
783	0.003299	0.01183	0.064477	0.064296	0.070817	0.074008	0.081406	0.075004	0.078387	0.070868	0.083554	0.079052	0.0812	0.08257	0.082565	0.087289	0.19661	0.19217	0.08161
784	0.003338	0.011551	0.064263	0.063948	0.070574	0.073766	0.081217	0.074748	0.078284	0.070723	0.083272	0.078842	0.08098	0.082407	0.082368	0.086928	0.19612	0.191917	0.081432
785	0.003236	0.011501	0.064115	0.064074	0.070662	0.073612	0.08112	0.074672	0.078251	0.070684	0.083246	0.078757	0.080932	0.08237	0.082327	0.086843	0.19604	0.191662	0.081411
786	0.003093	0.011504	0.064178	0.064038	0.070684	0.07371	0.081274	0.074787	0.078288	0.070842	0.083286	0.078835	0.080958	0.082428	0.082262	0.086909	0.195963	0.191457	0.081406
787	0.003067	0.011143	0.063951	0.06379	0.07049	0.073477	0.080972	0.074594	0.078049	0.070462	0.082902	0.078458	0.080649	0.082167	0.082073	0.086643	0.195648	0.191159	0.08103
788	0.003182	0.011177	0.063862	0.063797	0.070525	0.073503	0.080999	0.074489	0.078029	0.070543	0.083042	0.078485	0.080757	0.082119	0.082039	0.086581	0.195477	0.191142	0.081158
789	0.003048	0.010955	0.063689	0.063657	0.070294	0.073253	0.080864	0.074349	0.077899	0.070387	0.082951	0.078361	0.080594	0.081967	0.081797	0.0864	0.195131	0.190959	0.080974
790	0.003146	0.010853	0.063612	0.063607	0.070224	0.073252	0.08067	0.074201	0.07766	0.070162	0.082819	0.078223	0.080407	0.081806	0.081703	0.086391	0.194697	0.190802	0.080885
791	0.003004	0.010613	0.063408	0.063336	0.070135	0.073007	0.080573	0.073973	0.077493	0.070036	0.082537	0.07798	0.080274	0.081532	0.081431	0.086258	0.194511	0.190334	0.080777
792	0.00296	0.010528	0.063312	0.063234	0.070078	0.072865	0.080536	0.073873	0.077493	0.069868	0.082469	0.077686	0.080229	0.081511	0.081424	0.086154	0.194327	0.190089	0.080677
793	0.002945	0.01057	0.063353	0.063322	0.070315	0.072814	0.080517	0.073974	0.077541	0.069865	0.082545	0.077811	0.080209	0.081453	0.081503	0.086042	0.194334	0.189963	0.080718
794	0.002888	0.010398	0.063269	0.063164	0.070242	0.072863	0.080505	0.073847	0.077423	0.069823	0.082443	0.077847	0.080185	0.081345	0.081339	0.085885	0.194317	0.189688	0.080607
795	0.002717	0.010286	0.063208	0.063095	0.06992	0.072715	0.080269	0.073766	0.077198	0.069674	0.08227	0.0779	0.079958	0.081195	0.081266	0.085869	0.193972	0.189395	0.080587
796	0.00263	0.010208	0.062938	0.062895	0.069745	0.072477	0.080151	0.073542	0.077108	0.069591	0.082217	0.077748	0.079847	0.081123	0.081048	0.085756	0.193759	0.189139	0.080445
797	0.002526	0.010243	0.062978	0.063049	0.069764	0.072552	0.080289	0.073599	0.0771	0.069613	0.082171	0.077591	0.079998	0.081067	0.081061	0.085902	0.193613	0.188878	0.080451
798	0.002629	0.010148	0.062765	0.062924	0.069669	0.072515	0.0802	0.073553	0.076903	0.069456	0.08202	0.077332	0.079923	0.08093	0.080976	0.08578	0.193283	0.188691	0.080234
799	0.002504	0.010082	0.062692	0.062871	0.069677	0.072577	0.080092	0.073437	0.076879	0.069409	0.082047	0.077195	0.079764	0.080824	0.080827	0.085707	0.193	0.188365	0.080228
800	0.002521	0.010095	0.06267	0.06279	0.069651	0.072672	0.080164	0.073521	0.076927	0.069427	0.081954	0.077286	0.079745	0.080866	0.080855	0.085892	0.193228	0.188341	0.080153

## Sheet: MB dye FeNPs
Mb dye removal by FeNPs
W.nm	0min	10min	20min	30min	40min	50min	60min	70min	80min	90min	100min	110min	120min	130min	140min	150min	160min	170min	180min
300	3.39474	0.772167	0.833245	0.850879	0.845647	0.853747	0.8523	0.863709	0.843208	0.854388	0.85506	0.840956	0.841356	0.84422	0.832974	0.832044	0.700166	0.702898	0.693902
301	1.48638	0.716123	0.783569	0.802868	0.799077	0.807486	0.807208	0.819111	0.798236	0.811806	0.812935	0.799075	0.800275	0.804366	0.793876	0.793122	0.658007	0.661058	0.651932
302	0.990041	0.662931	0.736168	0.756914	0.755169	0.763674	0.764707	0.776439	0.757665	0.771528	0.772172	0.759621	0.761443	0.764982	0.755369	0.7557	0.617171	0.620565	0.611551
303	0.783536	0.612929	0.691659	0.713279	0.713386	0.721796	0.723547	0.736037	0.718466	0.731984	0.733183	0.721576	0.722929	0.727103	0.71788	0.718986	0.577175	0.580484	0.571931
304	0.653343	0.565762	0.649438	0.671905	0.672828	0.681722	0.683478	0.69662	0.680359	0.694041	0.69511	0.684099	0.686316	0.691466	0.681658	0.683995	0.539569	0.54284	0.535057
305	0.562023	0.520356	0.609654	0.632746	0.635334	0.643976	0.646472	0.659403	0.643788	0.657675	0.659633	0.649063	0.651993	0.657482	0.648307	0.651871	0.503869	0.507084	0.499362
306	0.489966	0.478919	0.572835	0.596005	0.600398	0.609836	0.612355	0.625759	0.611109	0.624789	0.627269	0.617051	0.620086	0.62584	0.616844	0.621562	0.470421	0.473049	0.466424
307	0.434697	0.442716	0.540836	0.564716	0.569659	0.579485	0.581876	0.596308	0.582161	0.595497	0.598263	0.588929	0.591951	0.597068	0.588783	0.594335	0.440329	0.443124	0.43705
308	0.392597	0.412687	0.514096	0.538243	0.543716	0.553568	0.556412	0.570853	0.557399	0.57087	0.573647	0.564155	0.56787	0.573786	0.565427	0.571071	0.415527	0.418513	0.412387
309	0.359476	0.387143	0.491477	0.516163	0.522362	0.531888	0.53534	0.549962	0.536538	0.550316	0.55281	0.543717	0.547824	0.554265	0.546537	0.552201	0.394838	0.397455	0.391663
310	0.334114	0.366826	0.473623	0.498262	0.504788	0.515011	0.51857	0.533333	0.52005	0.533583	0.536265	0.527143	0.531715	0.538536	0.530154	0.536878	0.378103	0.380445	0.374681
311	0.31355	0.350153	0.459612	0.484286	0.4915	0.50159	0.505291	0.519605	0.506929	0.52022	0.523194	0.514415	0.519098	0.525449	0.517883	0.524306	0.364275	0.366712	0.361451
312	0.297775	0.337378	0.448105	0.473031	0.480425	0.490514	0.494343	0.508127	0.49597	0.509408	0.512615	0.503629	0.508685	0.515538	0.507706	0.514415	0.353325	0.355853	0.350495
313	0.285111	0.326536	0.438593	0.463768	0.471508	0.481657	0.485518	0.499605	0.487467	0.500519	0.503959	0.495212	0.500187	0.507046	0.499672	0.506185	0.34434	0.346788	0.341635
314	0.274797	0.31793	0.431343	0.456068	0.464362	0.474644	0.478427	0.492275	0.480481	0.493543	0.497323	0.488349	0.493492	0.50063	0.492957	0.500254	0.337161	0.339317	0.334293
315	0.266621	0.310241	0.424453	0.448878	0.458079	0.467981	0.472078	0.485665	0.474194	0.487494	0.490553	0.481965	0.486867	0.494233	0.486584	0.493833	0.330826	0.332122	0.327494
316	0.259125	0.303505	0.418862	0.443158	0.452527	0.462943	0.466396	0.480271	0.468664	0.48205	0.484793	0.476652	0.481714	0.488889	0.48148	0.488541	0.325067	0.326003	0.321599
317	0.252157	0.297302	0.413519	0.437831	0.44752	0.457594	0.461205	0.474868	0.463504	0.477043	0.480209	0.471574	0.476901	0.483487	0.476324	0.483668	0.319591	0.320684	0.316691
318	0.246454	0.291768	0.408484	0.432948	0.443009	0.452984	0.457023	0.470286	0.459044	0.472093	0.475629	0.466898	0.472121	0.4793	0.471794	0.479255	0.314254	0.315512	0.312164
319	0.241697	0.286563	0.40419	0.428594	0.438825	0.448338	0.452472	0.466161	0.454881	0.46755	0.470792	0.462636	0.4679	0.475064	0.467748	0.474783	0.309332	0.31078	0.307455
320	0.237068	0.282315	0.400576	0.425028	0.434866	0.444619	0.448951	0.462486	0.451006	0.463926	0.467228	0.45904	0.464598	0.472473	0.464317	0.471392	0.305455	0.306717	0.303739
321	0.233468	0.278116	0.397244	0.421252	0.431432	0.441311	0.445409	0.459059	0.447336	0.460631	0.463658	0.455863	0.46153	0.469231	0.461167	0.468498	0.301988	0.302903	0.300267
322	0.229658	0.275097	0.394363	0.418784	0.428754	0.438825	0.442438	0.456285	0.444697	0.457266	0.460857	0.4532	0.459659	0.466917	0.458272	0.465654	0.298902	0.299209	0.297556
323	0.226915	0.271784	0.39132	0.415707	0.426176	0.436276	0.439605	0.453493	0.441894	0.454804	0.458142	0.450265	0.45687	0.463876	0.455263	0.462973	0.295827	0.296323	0.294692
324	0.223502	0.268597	0.388646	0.412715	0.423208	0.433536	0.437004	0.450735	0.438976	0.451715	0.455099	0.44728	0.454166	0.46095	0.452555	0.459876	0.293172	0.293469	0.291624
325	0.220199	0.265434	0.38535	0.409627	0.420231	0.430476	0.433787	0.447659	0.435982	0.448603	0.452014	0.445569	0.451154	0.457621	0.449265	0.456625	0.290025	0.290513	0.288587
326	0.216161	0.261365	0.381822	0.406185	0.416691	0.427243	0.430607	0.444016	0.432352	0.445448	0.448827	0.44213	0.448372	0.453292	0.445318	0.453676	0.286442	0.287161	0.285227
327	0.211757	0.256945	0.377713	0.40192	0.412388	0.422929	0.426165	0.439818	0.427944	0.441604	0.444847	0.437764	0.443969	0.449144	0.441243	0.449635	0.282201	0.283029	0.281069
328	0.206313	0.25119	0.37281	0.397183	0.407806	0.418375	0.421176	0.434716	0.422329	0.436981	0.440226	0.432883	0.439389	0.444556	0.436736	0.445097	0.277742	0.278375	0.276528
329	0.199317	0.244251	0.366696	0.391186	0.401747	0.412569	0.415508	0.428798	0.416591	0.431179	0.434529	0.427216	0.43402	0.439193	0.431273	0.439973	0.272349	0.272528	0.271015
330	0.192694	0.237648	0.360893	0.385276	0.396091	0.407117	0.409823	0.423274	0.411375	0.425564	0.429025	0.421854	0.428374	0.43374	0.426337	0.434149	0.266916	0.267259	0.265248
331	0.189353	0.234182	0.357295	0.382376	0.393112	0.403948	0.40684	0.420304	0.408139	0.422757	0.425696	0.418715	0.42533	0.430845	0.423476	0.431215	0.263671	0.264245	0.261784
332	0.169529	0.214491	0.339447	0.364726	0.376298	0.386793	0.390014	0.403593	0.391967	0.405901	0.40876	0.402267	0.409194	0.414551	0.409362	0.417364	0.247747	0.248326	0.24711
333	0.15817	0.203086	0.32953	0.354706	0.366591	0.377422	0.380552	0.39361	0.383174	0.396713	0.399302	0.392968	0.400287	0.405695	0.400763	0.408727	0.239313	0.239393	0.238313
334	0.147265	0.192063	0.319375	0.344977	0.356987	0.367952	0.371208	0.384409	0.374047	0.387186	0.390237	0.383594	0.391535	0.396882	0.392018	0.40023	0.230303	0.230654	0.229964
335	0.136262	0.181113	0.309408	0.335067	0.347778	0.358134	0.361727	0.374865	0.364989	0.377792	0.381072	0.374735	0.382635	0.38809	0.383061	0.391957	0.221511	0.221499	0.221125
336	0.12569	0.170764	0.3002	0.325732	0.338729	0.348961	0.352614	0.365727	0.356571	0.369243	0.372797	0.364967	0.374166	0.379979	0.374782	0.384223	0.213441	0.213042	0.212675
337	0.116818	0.161283	0.291635	0.317548	0.330542	0.340829	0.344667	0.357676	0.348438	0.361329	0.364413	0.35727	0.366302	0.372603	0.367262	0.377101	0.205883	0.206372	0.205443
338	0.109323	0.153799	0.284872	0.310929	0.324453	0.33469	0.338401	0.351364	0.342284	0.355598	0.358462	0.350902	0.360382	0.366767	0.36169	0.371235	0.199876	0.200452	0.199894
339	0.105876	0.150348	0.282036	0.308041	0.32169	0.331831	0.33534	0.348554	0.339279	0.352437	0.355442	0.347988	0.357693	0.363522	0.358772	0.368574	0.197047	0.197621	0.197268
340	0.096541	0.135203	0.272798	0.299649	0.310483	0.318215	0.321947	0.333123	0.325214	0.332462	0.337748	0.326903	0.339663	0.342801	0.338959	0.348161	0.180758	0.184443	0.184446
341	0.08853	0.127838	0.266528	0.293029	0.304541	0.311257	0.315775	0.327559	0.319296	0.327456	0.332211	0.321131	0.334422	0.336856	0.333202	0.343834	0.17518	0.17973	0.178914
342	0.081063	0.120862	0.259905	0.286516	0.298375	0.305839	0.310352	0.321945	0.314603	0.322067	0.327297	0.316255	0.329974	0.332193	0.328766	0.339345	0.170817	0.174266	0.174082
343	0.075262	0.115412	0.254357	0.28138	0.293699	0.300731	0.305928	0.317468	0.310078	0.318037	0.323686	0.3127	0.325348	0.329183	0.325268	0.335421	0.167937	0.169603	0.170366
344	0.070105	0.110002	0.248184	0.27639	0.289045	0.296728	0.301608	0.312622	0.305833	0.314053	0.319673	0.309086	0.32038	0.325648	0.322192	0.332323	0.166051	0.166133	0.166642
345	0.065704	0.105577	0.2442	0.273038	0.2853	0.293144	0.298423	0.309541	0.302008	0.311132	0.316537	0.306472	0.316886	0.32426	0.319673	0.329594	0.162694	0.163377	0.163517
346	0.061255	0.102098	0.240613	0.269328	0.282317	0.290363	0.295157	0.307091	0.299423	0.308504	0.314478	0.304347	0.314855	0.322822	0.31789	0.327653	0.160223	0.161218	0.161164
347	0.058045	0.100164	0.239223	0.268091	0.280896	0.288952	0.294957	0.306254	0.298578	0.307922	0.313455	0.304154	0.314517	0.32261	0.317572	0.327459	0.159536	0.160221	0.160442
348	0.054585	0.096737	0.235927	0.264709	0.277587	0.286104	0.291519	0.30313	0.295934	0.305252	0.31054	0.301373	0.312071	0.320524	0.315259	0.324656	0.15678	0.157296	0.157762
349	0.051305	0.093848	0.233439	0.262104	0.274524	0.28343	0.290134	0.300996	0.293726	0.303135	0.308847	0.29954	0.310107	0.318511	0.313585	0.322918	0.15484	0.154581	0.155658
350	0.048671	0.090926	0.231109	0.259672	0.272031	0.281464	0.287705	0.298961	0.291001	0.301257	0.306272	0.297573	0.308204	0.316594	0.311675	0.321332	0.152465	0.152458	0.153766
351	0.046006	0.088077	0.228639	0.256956	0.269557	0.279063	0.285432	0.297122	0.28909	0.299092	0.304726	0.295725	0.30623	0.314641	0.309596	0.319413	0.150202	0.150643	0.15169
352	0.044004	0.085572	0.226548	0.254369	0.267451	0.277464	0.284281	0.295076	0.287683	0.297358	0.30318	0.294011	0.304989	0.313428	0.308081	0.318375	0.148556	0.149029	0.149931
353	0.042119	0.083051	0.224488	0.251835	0.26573	0.275159	0.28387	0.293	0.285947	0.296211	0.301633	0.292403	0.303551	0.311969	0.306564	0.317009	0.146717	0.147303	0.14827
354	0.040932	0.080271	0.222166	0.249692	0.264124	0.273881	0.282202	0.291369	0.284352	0.294704	0.299848	0.290719	0.301653	0.310428	0.305271	0.315636	0.144951	0.145385	0.146131
355	0.038947	0.078261	0.220196	0.248106	0.262548	0.272327	0.280262	0.290125	0.282778	0.29306	0.29841	0.289585	0.30056	0.309231	0.303603	0.314767	0.143407	0.143978	0.144663
356	0.037138	0.075832	0.218205	0.246279	0.261333	0.270484	0.278542	0.288701	0.281361	0.291647	0.296735	0.288622	0.299558	0.307683	0.302612	0.313468	0.141545	0.141974	0.14259
357	0.035596	0.074187	0.216498	0.244681	0.260169	0.269077	0.277396	0.287138	0.27999	0.290053	0.295111	0.287574	0.29824	0.306472	0.30178	0.312725	0.140112	0.140616	0.141438
358	0.033871	0.07227	0.215389	0.243263	0.259174	0.267989	0.275942	0.285415	0.278966	0.288972	0.294183	0.28665	0.297113	0.305289	0.300575	0.311765	0.139058	0.139162	0.140127
359	0.032684	0.070358	0.214422	0.24172	0.258823	0.266241	0.274426	0.283834	0.277566	0.287415	0.292845	0.285039	0.296352	0.304317	0.299221	0.310514	0.137631	0.137819	0.138585
360	0.032478	0.069162	0.214545	0.240829	0.258269	0.265393	0.273779	0.281814	0.276917	0.286745	0.292018	0.284422	0.29624	0.303628	0.298778	0.309855	0.137056	0.13663	0.137863
361	0.031623	0.067972	0.214304	0.240615	0.257834	0.264745	0.273532	0.280748	0.276674	0.286163	0.291207	0.284221	0.296835	0.303354	0.298231	0.309394	0.136453	0.13627	0.137457
362	0.03042	0.066701	0.213561	0.240081	0.257741	0.264164	0.272959	0.280355	0.276318	0.285787	0.290436	0.283674	0.296298	0.302959	0.297898	0.308146	0.135711	0.135161	0.137058
363	0.029876	0.065539	0.213037	0.239536	0.256971	0.263698	0.272407	0.28	0.274876	0.285147	0.290104	0.282973	0.295747	0.302805	0.297069	0.306969	0.135251	0.134897	0.136331
364	0.029436	0.064361	0.212232	0.238382	0.256096	0.262944	0.27199	0.279065	0.272874	0.285021	0.289589	0.282053	0.294619	0.302234	0.296605	0.306319	0.134256	0.134226	0.135437
365	0.028717	0.063659	0.211994	0.238017	0.256147	0.262682	0.271616	0.278598	0.272271	0.28609	0.289057	0.281521	0.294137	0.301105	0.296711	0.305982	0.133587	0.133685	0.134938
366	0.028487	0.062419	0.211501	0.23774	0.255644	0.261884	0.270761	0.278477	0.271827	0.28601	0.288641	0.281043	0.29406	0.300286	0.296262	0.305488	0.132789	0.132931	0.134004
367	0.028591	0.062236	0.211652	0.237895	0.255959	0.262677	0.2714	0.278349	0.272717	0.286656	0.288687	0.281225	0.294337	0.300504	0.296267	0.306067	0.133088	0.133392	0.134422
368	0.028311	0.061765	0.211186	0.237837	0.256195	0.262614	0.271561	0.278634	0.272097	0.286434	0.288604	0.281182	0.294622	0.300371	0.295793	0.306207	0.13286	0.133244	0.134152
369	0.028163	0.061179	0.211187	0.237563	0.255666	0.262248	0.271281	0.278366	0.272173	0.286197	0.288265	0.281285	0.294159	0.300187	0.295661	0.305731	0.132117	0.132853	0.134373
370	0.028545	0.061127	0.211155	0.237661	0.255691	0.262664	0.27127	0.278403	0.271938	0.285694	0.288112	0.281518	0.293277	0.300119	0.295981	0.306127	0.131981	0.132627	0.134028
371	0.025073	0.059584	0.207826	0.234611	0.253337	0.260589	0.268463	0.277605	0.2726	0.283944	0.287261	0.282795	0.294728	0.3014	0.297173	0.309632	0.128959	0.128999	0.130676
372	0.02507	0.059214	0.207474	0.234829	0.253584	0.260626	0.268678	0.277835	0.272608	0.283974	0.287397	0.283137	0.294995	0.30184	0.29762	0.310032	0.128889	0.128479	0.130249
373	0.025089	0.058823	0.207274	0.234385	0.253248	0.260642	0.268694	0.277725	0.272361	0.283721	0.287498	0.283096	0.294842	0.302193	0.29753	0.310035	0.128458	0.128189	0.12986
374	0.025263	0.058622	0.207192	0.234463	0.25303	0.260495	0.268925	0.277839	0.272835	0.283826	0.287929	0.283284	0.294302	0.302681	0.297959	0.310418	0.128189	0.128139	0.130024
375	0.025211	0.058583	0.207553	0.234698	0.253453	0.26116	0.26906	0.277962	0.273024	0.284333	0.28853	0.284014	0.295093	0.303365	0.298671	0.311017	0.128336	0.128452	0.130095
376	0.025442	0.058487	0.207675	0.234942	0.253588	0.261294	0.269528	0.278286	0.273411	0.284757	0.288591	0.284731	0.295468	0.30375	0.298979	0.311815	0.128268	0.12858	0.130245
377	0.025414	0.057954	0.207145	0.234836	0.253347	0.261329	0.269552	0.278731	0.27307	0.284862	0.28861	0.284613	0.296039	0.303721	0.29929	0.312128	0.128288	0.128532	0.129881
378	0.025767	0.058226	0.207111	0.234846	0.253635	0.261877	0.270209	0.279271	0.272692	0.285373	0.289172	0.285447	0.297166	0.304575	0.299774	0.312798	0.128489	0.12884	0.130062
379	0.025872	0.058197	0.207343	0.235293	0.254016	0.262112	0.270473	0.279654	0.273345	0.285811	0.289824	0.286259	0.298422	0.305018	0.300501	0.313355	0.128508	0.128884	0.130201
380	0.026213	0.058276	0.20707	0.235577	0.254171	0.2625	0.270673	0.279522	0.273673	0.285866	0.290123	0.286614	0.298754	0.305332	0.300825	0.313912	0.128362	0.12873	0.130014
381	0.026209	0.058191	0.207638	0.235727	0.254292	0.26261	0.270915	0.279896	0.274001	0.286171	0.290166	0.28697	0.299255	0.305672	0.301186	0.314215	0.128493	0.128907	0.130298
382	0.026678	0.058362	0.208555	0.235923	0.254817	0.263124	0.271456	0.280545	0.274242	0.286622	0.290856	0.28774	0.299734	0.305969	0.301846	0.314885	0.128827	0.129061	0.130496
383	0.026895	0.058476	0.20892	0.236311	0.255044	0.263312	0.271967	0.281012	0.274842	0.286774	0.2912	0.288385	0.300508	0.306587	0.302106	0.315513	0.12898	0.12935	0.130639
384	0.027358	0.058454	0.208989	0.236684	0.255207	0.263553	0.272141	0.281345	0.275093	0.286926	0.29147	0.288718	0.300516	0.30708	0.302572	0.315668	0.12905	0.129185	0.130875
385	0.027593	0.058529	0.209347	0.236748	0.255314	0.264181	0.272199	0.281407	0.275323	0.287131	0.291521	0.288961	0.300835	0.307344	0.302777	0.315996	0.129115	0.129257	0.131041
386	0.028384	0.059698	0.21031	0.237646	0.256205	0.266334	0.272863	0.283552	0.276342	0.288217	0.29221	0.289797	0.302006	0.308707	0.304153	0.317288	0.129783	0.129602	0.131639
387	0.028699	0.059835	0.210362	0.238275	0.256547	0.266572	0.273212	0.283626	0.276784	0.288389	0.292605	0.290362	0.302509	0.309202	0.304334	0.317713	0.129807	0.1301	0.131934
388	0.029141	0.059972	0.210758	0.238808	0.257277	0.267122	0.274079	0.284173	0.277231	0.288607	0.293269	0.291004	0.303081	0.309874	0.304959	0.318666	0.130263	0.130431	0.13223
389	0.029512	0.060392	0.21111	0.239034	0.257515	0.267605	0.274415	0.284837	0.277925	0.289076	0.293836	0.29158	0.303689	0.310426	0.305759	0.319517	0.13098	0.130568	0.132715
390	0.029692	0.060342	0.211451	0.239694	0.258087	0.268023	0.274633	0.285189	0.278243	0.289741	0.294211	0.292268	0.303969	0.311133	0.306203	0.320087	0.131109	0.130739	0.132848
391	0.029999	0.06017	0.211592	0.240243	0.258234	0.268137	0.274631	0.285154	0.278417	0.289494	0.294136	0.292366	0.304149	0.311255	0.306492	0.320278	0.130914	0.130551	0.132833
392	0.030396	0.059886	0.211521	0.240473	0.258047	0.268353	0.274951	0.28536	0.278804	0.289814	0.294431	0.292509	0.304624	0.311615	0.306886	0.320422	0.130926	0.130192	0.132884
393	0.030337	0.059713	0.211646	0.240629	0.258212	0.268434	0.275061	0.285733	0.278805	0.290105	0.294884	0.292659	0.305007	0.311606	0.307199	0.320304	0.130852	0.129566	0.132869
394	0.030484	0.059424	0.211403	0.240356	0.258155	0.268355	0.275048	0.285457	0.278603	0.289936	0.294894	0.292733	0.305046	0.311429	0.307608	0.320127	0.130854	0.129467	0.132875
395	0.030303	0.05898	0.211058	0.2401	0.258067	0.267803	0.274934	0.285087	0.278768	0.289892	0.294754	0.292634	0.305327	0.311092	0.307586	0.319926	0.130335	0.129087	0.132451
396	0.029735	0.058373	0.211024	0.239667	0.257869	0.267432	0.274969	0.284886	0.278923	0.28968	0.294852	0.292576	0.304992	0.31128	0.307425	0.320021	0.130046	0.12886	0.132208
397	0.02902	0.057633	0.210383	0.23923	0.257223	0.266719	0.274487	0.283749	0.278919	0.288868	0.294447	0.29245	0.305052	0.310739	0.307251	0.320165	0.129395	0.128152	0.131662
398	0.028349	0.056716	0.209705	0.238541	0.256607	0.266298	0.273873	0.283223	0.278364	0.288337	0.29414	0.291723	0.304746	0.310156	0.307077	0.319486	0.128592	0.127533	0.130975
399	0.027595	0.055616	0.208898	0.237841	0.255864	0.265486	0.273203	0.282562	0.277718	0.287919	0.293348	0.291422	0.304816	0.309726	0.306612	0.319128	0.127802	0.12678	0.130161
400	0.026708	0.05453	0.208085	0.237223	0.255189	0.264746	0.27271	0.282075	0.277071	0.287276	0.292855	0.29096	0.304166	0.30918	0.305935	0.318795	0.126999	0.126132	0.129263
401	0.025463	0.05306	0.206712	0.235801	0.254015	0.263628	0.271384	0.280785	0.276071	0.286231	0.291723	0.289775	0.303121	0.308246	0.304953	0.317669	0.125962	0.124857	0.127485
402	0.024323	0.051794	0.205849	0.234753	0.253111	0.262698	0.270593	0.280034	0.275214	0.285261	0.291237	0.289456	0.302538	0.307663	0.304379	0.317114	0.125018	0.123895	0.126638
403	0.023078	0.050349	0.204719	0.233687	0.252089	0.261679	0.269484	0.278974	0.27415	0.284301	0.290139	0.288115	0.301748	0.306803	0.303805	0.31644	0.123839	0.122685	0.125607
404	0.021663	0.048763	0.203537	0.23264	0.250868	0.260527	0.268613	0.278119	0.273049	0.283264	0.288921	0.287043	0.300695	0.306112	0.302789	0.31548	0.122636	0.121662	0.12446
405	0.020458	0.047519	0.202329	0.231317	0.250017	0.259469	0.267497	0.276801	0.272119	0.282188	0.288285	0.28625	0.29976	0.305317	0.301897	0.314721	0.12143	0.120475	0.12322
406	0.019485	0.046025	0.201198	0.230274	0.248842	0.258612	0.2665	0.275936	0.271214	0.281184	0.287254	0.285302	0.298993	0.304927	0.300868	0.314016	0.120035	0.119374	0.122196
407	0.018284	0.044785	0.200206	0.22923	0.247796	0.257703	0.26586	0.274994	0.270591	0.28036	0.286456	0.284622	0.298144	0.304116	0.300264	0.313297	0.119164	0.118532	0.121361
408	0.017367	0.043464	0.199151	0.228383	0.246889	0.25671	0.264797	0.274058	0.269746	0.279516	0.285581	0.283815	0.297354	0.303334	0.29958	0.312698	0.118267	0.117636	0.120381
409	0.016346	0.042428	0.198603	0.227758	0.24618	0.256067	0.264264	0.27334	0.268933	0.278743	0.284985	0.283207	0.29673	0.302807	0.299205	0.312297	0.117483	0.116808	0.119786
410	0.015597	0.041365	0.197661	0.226723	0.24536	0.255268	0.263611	0.272709	0.268186	0.277968	0.284203	0.282407	0.295952	0.301998	0.298977	0.311792	0.116699	0.115948	0.118781
411	0.014823	0.040706	0.197083	0.226344	0.245019	0.254907	0.263162	0.272376	0.267709	0.277655	0.283833	0.282029	0.295241	0.301782	0.298779	0.311855	0.116221	0.115559	0.118265
412	0.014254	0.039984	0.196631	0.225945	0.244721	0.254624	0.262728	0.271927	0.267109	0.277086	0.283392	0.281795	0.294928	0.301484	0.298424	0.311799	0.115748	0.11501	0.11798
413	0.013749	0.039391	0.196044	0.225364	0.244256	0.254636	0.262438	0.271472	0.266666	0.276675	0.282458	0.28144	0.29469	0.301393	0.298119	0.311392	0.115189	0.114462	0.117469
414	0.013458	0.038573	0.195508	0.224925	0.243841	0.254218	0.262206	0.271108	0.266457	0.276438	0.282187	0.281334	0.294333	0.301298	0.297969	0.311368	0.114859	0.113998	0.117123
415	0.013255	0.03809	0.195173	0.224569	0.243427	0.254119	0.261944	0.271012	0.266178	0.276169	0.281806	0.281052	0.294264	0.30116	0.297882	0.311193	0.11438	0.113656	0.117058
416	0.013094	0.037424	0.194999	0.224471	0.242903	0.253996	0.261946	0.270718	0.266138	0.27608	0.281509	0.281101	0.294277	0.301309	0.29794	0.311228	0.114427	0.113524	0.11682
417	0.012981	0.037235	0.194866	0.224458	0.242861	0.254038	0.261858	0.270584	0.266238	0.27621	0.281562	0.281149	0.294495	0.301388	0.29789	0.31121	0.114334	0.113336	0.116577
418	0.012996	0.03713	0.194877	0.224545	0.243096	0.254083	0.261966	0.270739	0.266218	0.276206	0.281757	0.281827	0.294369	0.301271	0.298274	0.311564	0.114149	0.113273	0.116665
419	0.013058	0.036955	0.194823	0.224609	0.243225	0.253842	0.262338	0.270657	0.266507	0.27598	0.281722	0.281843	0.294425	0.301499	0.298307	0.311618	0.114109	0.113281	0.116579
420	0.013032	0.036884	0.194921	0.224744	0.243485	0.25409	0.262452	0.270853	0.266785	0.276425	0.281825	0.282034	0.294528	0.301611	0.298667	0.31201	0.114335	0.113333	0.116685
421	0.01329	0.036709	0.194863	0.224779	0.243456	0.254106	0.262445	0.271176	0.26695	0.276448	0.282032	0.282215	0.294763	0.301607	0.299086	0.312069	0.11424	0.113337	0.116838
422	0.013414	0.036617	0.194902	0.22503	0.243626	0.254283	0.262585	0.271386	0.267045	0.276503	0.282101	0.282231	0.294875	0.301818	0.299253	0.312382	0.114113	0.113112	0.117055
423	0.013736	0.036973	0.195206	0.225146	0.24393	0.254544	0.263012	0.271656	0.267542	0.27684	0.282333	0.282513	0.295399	0.302297	0.29963	0.312756	0.114334	0.113395	0.117487
424	0.014039	0.037109	0.195646	0.225455	0.244379	0.25486	0.263248	0.271862	0.267865	0.276964	0.282645	0.282355	0.295757	0.302593	0.29994	0.312975	0.114639	0.113659	0.117616
425	0.014498	0.037283	0.195912	0.225787	0.244682	0.255227	0.26349	0.272278	0.268503	0.277338	0.282799	0.282626	0.296083	0.303085	0.300199	0.313479	0.114799	0.113921	0.117985
426	0.014732	0.037422	0.196187	0.225974	0.245016	0.25549	0.263912	0.272575	0.269113	0.277676	0.283029	0.282934	0.296405	0.303405	0.300499	0.31374	0.11507	0.114089	0.118134
427	0.015254	0.037633	0.196289	0.226472	0.245355	0.255844	0.264362	0.27299	0.269503	0.278089	0.283158	0.283154	0.296697	0.30377	0.301094	0.314088	0.115272	0.114366	0.118389
428	0.015966	0.037861	0.196671	0.226844	0.245892	0.256226	0.264648	0.273349	0.269799	0.278389	0.283505	0.283658	0.297238	0.304225	0.301668	0.314721	0.115649	0.114783	0.118755
429	0.01602	0.038091	0.197017	0.227081	0.246047	0.256612	0.264542	0.273475	0.269956	0.27876	0.283588	0.283667	0.297332	0.304459	0.301815	0.314991	0.115696	0.114917	0.118998
430	0.016436	0.038463	0.197459	0.227467	0.24645	0.256976	0.264786	0.274005	0.270622	0.279373	0.283738	0.284076	0.297945	0.304787	0.30241	0.315383	0.11629	0.115292	0.11936
431	0.016768	0.038816	0.19777	0.22786	0.24682	0.257395	0.265266	0.274257	0.271	0.279571	0.283904	0.284321	0.298205	0.305094	0.302901	0.315737	0.116436	0.115594	0.119634
432	0.017264	0.03913	0.198161	0.228488	0.247319	0.257874	0.265705	0.274805	0.271425	0.28002	0.284201	0.284759	0.298701	0.305624	0.303452	0.316166	0.116799	0.115979	0.120037
433	0.017924	0.039657	0.198727	0.228987	0.247841	0.258245	0.266151	0.275267	0.271788	0.280438	0.284543	0.285094	0.299129	0.306031	0.303954	0.316742	0.117296	0.116408	0.120455
434	0.01841	0.040126	0.199196	0.22947	0.248524	0.258612	0.266704	0.275754	0.272443	0.280865	0.28474	0.285842	0.299491	0.306495	0.30452	0.317197	0.117716	0.11686	0.120896
435	0.018972	0.040223	0.199219	0.22965	0.248665	0.258989	0.266956	0.275925	0.272569	0.281015	0.285	0.286113	0.299799	0.306866	0.304482	0.31752	0.117972	0.116921	0.121132
436	0.019672	0.040633	0.199661	0.230239	0.249115	0.259563	0.267432	0.276471	0.272958	0.281462	0.285274	0.28633	0.300102	0.307118	0.304875	0.317881	0.118468	0.117342	0.121634
437	0.020083	0.041218	0.200354	0.230977	0.249834	0.260121	0.267921	0.277118	0.273678	0.28215	0.28567	0.28697	0.300803	0.307878	0.305562	0.318565	0.118993	0.117893	0.122271
438	0.02081	0.041801	0.200808	0.231447	0.250261	0.260556	0.268638	0.277564	0.274271	0.282513	0.286194	0.287256	0.301214	0.308326	0.306177	0.319032	0.119482	0.118511	0.122771
439	0.021739	0.042325	0.201186	0.231943	0.250738	0.26098	0.269202	0.278094	0.274654	0.283027	0.286456	0.287791	0.301622	0.308677	0.306473	0.319566	0.120132	0.11901	0.123174
440	0.022281	0.042917	0.201879	0.232376	0.251187	0.261214	0.269544	0.278531	0.275189	0.283545	0.286921	0.288224	0.302029	0.309217	0.30693	0.319978	0.120466	0.119602	0.123728
441	0.023003	0.043523	0.202297	0.23292	0.251731	0.261472	0.270088	0.278993	0.275644	0.283778	0.287515	0.288702	0.302573	0.309745	0.307203	0.320462	0.121193	0.120219	0.124343
442	0.023667	0.044187	0.202804	0.233529	0.252446	0.262157	0.270721	0.279778	0.276326	0.284449	0.288351	0.289136	0.303186	0.310314	0.307619	0.320934	0.121717	0.120788	0.124953
443	0.024482	0.044779	0.203597	0.23407	0.252942	0.262515	0.271368	0.280308	0.277086	0.28498	0.288553	0.289792	0.303602	0.310888	0.307956	0.321481	0.122439	0.121428	0.125623
444	0.025168	0.045309	0.204252	0.234377	0.253271	0.262869	0.271862	0.280464	0.277243	0.285376	0.288785	0.290064	0.303937	0.311139	0.308649	0.321655	0.122932	0.122047	0.12605
445	0.025829	0.046212	0.204572	0.235065	0.254052	0.263532	0.27248	0.28114	0.278133	0.285961	0.289329	0.290632	0.304532	0.311525	0.309137	0.322207	0.123654	0.122817	0.126809
446	0.026486	0.046693	0.205165	0.235663	0.25429	0.264111	0.272659	0.281486	0.278388	0.28635	0.289636	0.291068	0.305069	0.311888	0.309404	0.32229	0.124328	0.123235	0.127256
447	0.027418	0.047477	0.205614	0.236313	0.254853	0.264529	0.273439	0.281985	0.27901	0.286892	0.289833	0.291358	0.305545	0.312335	0.309697	0.322812	0.124891	0.124151	0.12788
448	0.028295	0.048184	0.206383	0.237072	0.255497	0.265082	0.274045	0.282616	0.279442	0.287554	0.290494	0.292115	0.306185	0.3132	0.310495	0.323209	0.125959	0.125379	0.128803
449	0.028917	0.048799	0.206844	0.23757	0.255949	0.26552	0.274381	0.282778	0.279561	0.288072	0.29055	0.29215	0.306311	0.313391	0.310544	0.323263	0.126487	0.126015	0.129159
450	0.029404	0.048971	0.206919	0.237853	0.256203	0.265768	0.274732	0.283065	0.279466	0.288127	0.290732	0.292411	0.306484	0.313312	0.310661	0.323391	0.126735	0.126078	0.129148
451	0.031395	0.051061	0.207531	0.239147	0.258031	0.267461	0.276283	0.284643	0.281067	0.290051	0.292575	0.295153	0.307791	0.314734	0.312473	0.324854	0.128849	0.128228	0.130646
452	0.032481	0.051814	0.208068	0.239601	0.258685	0.268233	0.276759	0.28511	0.281376	0.29024	0.29311	0.295808	0.308373	0.315245	0.312665	0.325278	0.129552	0.128871	0.131198
453	0.033382	0.052839	0.208934	0.240299	0.259403	0.268966	0.277451	0.285713	0.282359	0.290952	0.29391	0.296591	0.309674	0.315872	0.313576	0.325905	0.130408	0.129635	0.132239
454	0.034117	0.05358	0.209382	0.240893	0.259921	0.269403	0.277701	0.285901	0.282602	0.291313	0.294092	0.297241	0.310175	0.316308	0.313847	0.326263	0.130959	0.130151	0.132948
455	0.035041	0.054367	0.209963	0.241354	0.260511	0.269742	0.278183	0.286592	0.283345	0.291806	0.294692	0.297569	0.310764	0.316794	0.314437	0.326698	0.131564	0.130769	0.133707
456	0.036049	0.055155	0.210559	0.241865	0.260883	0.270359	0.278884	0.28706	0.283763	0.292223	0.295145	0.297853	0.311175	0.317371	0.314839	0.327061	0.132368	0.131424	0.134302
457	0.03706	0.056144	0.211297	0.242473	0.261568	0.270989	0.279418	0.287648	0.284282	0.292777	0.295785	0.298532	0.311631	0.318119	0.315353	0.327603	0.133217	0.13215	0.135068
458	0.038107	0.056961	0.211668	0.242844	0.261934	0.271401	0.27977	0.288394	0.284957	0.2933	0.296105	0.298875	0.312076	0.318633	0.31574	0.327958	0.133841	0.132785	0.135746
459	0.038918	0.057796	0.212405	0.243502	0.262518	0.271818	0.280458	0.288862	0.285453	0.293967	0.296859	0.299369	0.31261	0.319061	0.316305	0.328593	0.134521	0.133532	0.136383
460	0.040118	0.058565	0.213035	0.24405	0.263091	0.272285	0.280977	0.289109	0.285867	0.294096	0.2971	0.299857	0.312873	0.31928	0.316741	0.328939	0.134998	0.134121	0.137073
461	0.041078	0.059755	0.213608	0.244643	0.263752	0.272994	0.281767	0.290022	0.286734	0.294749	0.297776	0.300555	0.3135	0.320116	0.317488	0.329612	0.135905	0.134916	0.137959
462	0.042066	0.060431	0.214061	0.245274	0.264064	0.273484	0.282323	0.2904	0.287636	0.295204	0.298116	0.300937	0.314162	0.320679	0.317701	0.330058	0.136556	0.13561	0.138667
463	0.043216	0.06145	0.214739	0.245996	0.264709	0.274103	0.282939	0.291029	0.288217	0.295762	0.298784	0.301543	0.314672	0.321187	0.318229	0.330275	0.136743	0.13647	0.139398
464	0.044165	0.062365	0.215503	0.24664	0.265497	0.274757	0.28353	0.291654	0.288816	0.296296	0.29937	0.302252	0.315137	0.321616	0.318803	0.330825	0.137596	0.137211	0.140284
465	0.045178	0.063244	0.216197	0.247006	0.266034	0.275299	0.284159	0.292374	0.28897	0.296779	0.299826	0.302463	0.315753	0.322261	0.319231	0.33147	0.138294	0.137845	0.141111
466	0.046231	0.064028	0.216662	0.247705	0.266467	0.275711	0.284546	0.292919	0.289602	0.297363	0.299721	0.302849	0.31605	0.322823	0.319815	0.332054	0.13909	0.138651	0.141925
467	0.047053	0.064941	0.217341	0.248222	0.266966	0.276477	0.285178	0.293602	0.290458	0.297935	0.300397	0.303626	0.316682	0.323452	0.32017	0.332412	0.139928	0.139412	0.142697
468	0.048181	0.06594	0.218091	0.248919	0.26748	0.277045	0.285913	0.29405	0.291438	0.298656	0.300941	0.304258	0.31716	0.323968	0.320656	0.333116	0.140833	0.140209	0.143419
469	0.049091	0.066972	0.218752	0.249406	0.26756	0.277576	0.286759	0.294627	0.292033	0.299161	0.301485	0.30485	0.317879	0.324641	0.320978	0.33364	0.141696	0.140974	0.144344
470	0.050339	0.067925	0.219415	0.250203	0.268299	0.27822	0.287762	0.295101	0.292324	0.299398	0.302113	0.305405	0.318512	0.325119	0.321492	0.334268	0.142771	0.141688	0.145178
471	0.051245	0.068979	0.219994	0.250869	0.268737	0.278925	0.288457	0.295888	0.293086	0.300016	0.302715	0.305793	0.319038	0.325654	0.321808	0.335039	0.143485	0.142425	0.14601
472	0.052261	0.06979	0.220676	0.251427	0.269387	0.279656	0.289081	0.296415	0.293748	0.300349	0.303149	0.306324	0.319335	0.326315	0.322299	0.335503	0.144312	0.143218	0.146921
473	0.053308	0.070874	0.221551	0.251934	0.270119	0.280154	0.289583	0.296776	0.294283	0.300935	0.303728	0.307075	0.319996	0.327107	0.322745	0.336021	0.145173	0.144057	0.1477
474	0.054529	0.071944	0.222281	0.252717	0.271409	0.280899	0.290451	0.297599	0.295133	0.30191	0.304302	0.307777	0.320663	0.327953	0.323209	0.336741	0.14606	0.145061	0.148764
475	0.05573	0.07293	0.222891	0.253353	0.271946	0.281534	0.29094	0.298204	0.295749	0.302404	0.305185	0.308434	0.321284	0.32841	0.323751	0.337252	0.146815	0.145877	0.149466
476	0.056844	0.073981	0.223734	0.254089	0.272642	0.282336	0.291864	0.299027	0.296491	0.30309	0.305909	0.309074	0.321899	0.328984	0.324384	0.337886	0.147569	0.146693	0.150397
477	0.057928	0.075067	0.224441	0.254904	0.273376	0.283033	0.292447	0.299729	0.29721	0.303674	0.306621	0.309677	0.322572	0.329256	0.324927	0.338587	0.148506	0.147721	0.151208
478	0.059218	0.076102	0.225316	0.255637	0.274035	0.283664	0.293413	0.300559	0.298155	0.304485	0.307252	0.310349	0.323078	0.329533	0.32555	0.339376	0.149512	0.148546	0.152099
479	0.060215	0.077284	0.226129	0.256454	0.274789	0.284542	0.294249	0.301381	0.298766	0.305138	0.308063	0.311144	0.323817	0.330261	0.32636	0.340008	0.15047	0.149547	0.153057
480	0.061461	0.078256	0.226758	0.257058	0.2753	0.285176	0.294865	0.301892	0.299387	0.305627	0.308797	0.311815	0.32433	0.330809	0.32699	0.340511	0.151183	0.150183	0.153586
481	0.062614	0.079266	0.227644	0.257895	0.276032	0.286043	0.295523	0.302885	0.300302	0.30629	0.309554	0.312489	0.325144	0.331502	0.32777	0.341111	0.152221	0.151253	0.154142
482	0.063522	0.080462	0.228608	0.258825	0.277009	0.286752	0.296404	0.303577	0.30095	0.306857	0.310389	0.31336	0.325952	0.332214	0.328647	0.341956	0.153197	0.15235	0.155178
483	0.064642	0.081482	0.229379	0.259524	0.277542	0.287596	0.297103	0.304279	0.301619	0.30756	0.31105	0.313892	0.326417	0.332805	0.328904	0.342451	0.154103	0.153168	0.155949
484	0.06559	0.082509	0.229909	0.260025	0.277993	0.288091	0.297688	0.304659	0.30203	0.307978	0.311532	0.314342	0.326671	0.333385	0.329538	0.34292	0.154725	0.153723	0.156565
485	0.066033	0.082954	0.23021	0.260285	0.278267	0.288397	0.298014	0.305097	0.302336	0.308063	0.312135	0.314683	0.32693	0.333629	0.329714	0.343225	0.155051	0.154084	0.156778
486	0.068188	0.084838	0.232073	0.261754	0.279488	0.289392	0.299663	0.306929	0.30386	0.309059	0.313566	0.315422	0.328149	0.334846	0.331124	0.344401	0.156672	0.156004	0.15847
487	0.069057	0.085739	0.232708	0.262322	0.280117	0.290184	0.30053	0.307611	0.304574	0.309708	0.314014	0.316012	0.328781	0.335542	0.331769	0.344818	0.157489	0.156741	0.159252
488	0.070234	0.086876	0.233342	0.263223	0.280856	0.290915	0.301323	0.308243	0.305165	0.310266	0.314989	0.316803	0.329386	0.336141	0.332524	0.345665	0.158264	0.15759	0.159914
489	0.071212	0.087661	0.233998	0.263554	0.281325	0.291515	0.301995	0.308943	0.305823	0.310833	0.315602	0.317335	0.329611	0.336655	0.332902	0.345855	0.15922	0.158261	0.160635
490	0.071795	0.088542	0.234644	0.264317	0.282158	0.292084	0.302607	0.309596	0.306398	0.311343	0.315908	0.317818	0.330118	0.337066	0.333291	0.346435	0.159618	0.158829	0.161342
491	0.072782	0.089214	0.235099	0.265033	0.282649	0.292542	0.303264	0.31021	0.306909	0.311702	0.316376	0.318319	0.330632	0.337469	0.333876	0.346832	0.160474	0.159632	0.162264
492	0.073815	0.090073	0.235674	0.265596	0.282712	0.292928	0.303497	0.310335	0.306973	0.312064	0.316722	0.318722	0.331038	0.337933	0.334304	0.347193	0.161172	0.160013	0.162711
493	0.074573	0.090868	0.236117	0.266123	0.283302	0.293503	0.304115	0.311117	0.307887	0.312423	0.317189	0.319129	0.331162	0.338505	0.334719	0.347749	0.161762	0.160683	0.163471
494	0.075325	0.091484	0.236583	0.26631	0.283646	0.293948	0.304639	0.31155	0.308298	0.312834	0.317483	0.319641	0.331761	0.338773	0.33511	0.348049	0.162405	0.16135	0.163991
495	0.075872	0.091965	0.236725	0.266646	0.283903	0.29409	0.304801	0.311757	0.308268	0.312934	0.317517	0.319584	0.331648	0.338835	0.335239	0.348175	0.162661	0.161621	0.164244
496	0.076692	0.092586	0.237152	0.266992	0.284019	0.294353	0.305066	0.312078	0.308637	0.313169	0.317825	0.319987	0.331787	0.339069	0.335448	0.348435	0.163092	0.162035	0.164804
497	0.077082	0.092991	0.23739	0.267191	0.284207	0.294511	0.305347	0.312281	0.30886	0.313536	0.318057	0.319891	0.331816	0.339285	0.33563	0.348383	0.163548	0.162448	0.165419
498	0.077824	0.093437	0.237594	0.267205	0.284058	0.294691	0.305341	0.312493	0.308819	0.313542	0.318179	0.319946	0.331981	0.3392	0.33563	0.348511	0.163811	0.162622	0.165634
499	0.078066	0.09393	0.237675	0.267434	0.284381	0.295123	0.305724	0.312652	0.309197	0.313709	0.31834	0.320171	0.332005	0.339467	0.335832	0.348602	0.164339	0.163114	0.165834
500	0.078442	0.094189	0.237899	0.267484	0.284303	0.294857	0.305764	0.312682	0.309104	0.313637	0.318366	0.320225	0.332074	0.339373	0.335894	0.34824	0.164563	0.163385	0.166216
501	0.078542	0.094512	0.237901	0.267519	0.284095	0.294899	0.305782	0.312601	0.309163	0.313438	0.318404	0.32037	0.33198	0.339082	0.33572	0.348435	0.164587	0.163582	0.166323
502	0.079081	0.094603	0.237939	0.267187	0.28374	0.29465	0.305629	0.312595	0.308898	0.313327	0.318221	0.320438	0.331691	0.338881	0.335532	0.347993	0.164732	0.163593	0.166461
503	0.079397	0.094758	0.237876	0.267207	0.283914	0.294626	0.305754	0.312612	0.30879	0.313353	0.318159	0.320519	0.331656	0.338834	0.335425	0.348021	0.164885	0.163691	0.166499
504	0.079587	0.095069	0.238072	0.26734	0.28392	0.294721	0.306	0.312643	0.309063	0.313311	0.318104	0.32051	0.331677	0.338781	0.335437	0.34787	0.165141	0.164052	0.166708
505	0.079905	0.095291	0.238143	0.267417	0.283889	0.294636	0.305874	0.312782	0.309005	0.313287	0.318267	0.320453	0.331455	0.338579	0.335614	0.347889	0.165122	0.164151	0.166984
506	0.080144	0.095253	0.237969	0.267197	0.283492	0.294403	0.305689	0.312575	0.308792	0.313043	0.318052	0.32016	0.33106	0.338634	0.335321	0.347405	0.165158	0.164204	0.166883
507	0.080357	0.095423	0.237969	0.267487	0.283565	0.294406	0.305743	0.312815	0.308952	0.313283	0.318165	0.320335	0.331105	0.33856	0.335578	0.347622	0.165407	0.164478	0.167365
508	0.080494	0.096033	0.238145	0.267374	0.283696	0.294766	0.305881	0.312901	0.308993	0.313355	0.318364	0.32062	0.331195	0.338805	0.335654	0.34777	0.166021	0.164574	0.16767
509	0.081055	0.096417	0.238281	0.267088	0.283738	0.29466	0.306303	0.313066	0.309021	0.313143	0.318385	0.320552	0.330966	0.338814	0.335573	0.347544	0.165915	0.164804	0.167834
510	0.08137	0.096516	0.238368	0.267237	0.283565	0.294778	0.306149	0.313192	0.308932	0.313188	0.3183	0.320611	0.330918	0.338626	0.335715	0.347489	0.166102	0.164969	0.16798
511	0.081575	0.096791	0.238465	0.267406	0.283596	0.295035	0.306392	0.313226	0.309091	0.313196	0.318542	0.320641	0.331075	0.338912	0.335744	0.347636	0.166256	0.165277	0.168137
512	0.081857	0.097122	0.238605	0.267711	0.28366	0.295261	0.306556	0.313279	0.309256	0.313359	0.318654	0.320811	0.331057	0.339095	0.335872	0.347889	0.166558	0.165429	0.168579
513	0.082585	0.097518	0.238968	0.267904	0.283878	0.295507	0.306762	0.313609	0.309395	0.313416	0.318503	0.32111	0.331299	0.339197	0.336229	0.348065	0.166921	0.165397	0.169138
514	0.083042	0.097957	0.23948	0.268138	0.283961	0.295812	0.307013	0.313818	0.309717	0.31365	0.318721	0.3214	0.331418	0.33959	0.336625	0.34836	0.167295	0.165938	0.169613
515	0.083283	0.098716	0.239709	0.268463	0.284477	0.296118	0.307156	0.314416	0.309968	0.313994	0.319112	0.321829	0.331794	0.339932	0.336696	0.34875	0.167661	0.166355	0.169935
516	0.084147	0.099333	0.240196	0.268956	0.284896	0.296604	0.30759	0.314831	0.310397	0.314271	0.319476	0.322369	0.332282	0.34033	0.337241	0.349038	0.16825	0.167067	0.170589
517	0.084975	0.100237	0.240704	0.269508	0.285117	0.297075	0.308044	0.315532	0.310834	0.314581	0.319824	0.322737	0.33286	0.34075	0.337659	0.34912	0.168934	0.167519	0.171058
518	0.085918	0.101015	0.241475	0.270101	0.285876	0.297742	0.308734	0.316014	0.311281	0.315358	0.320579	0.323518	0.333538	0.341253	0.338305	0.349955	0.169684	0.168235	0.171775
519	0.086862	0.102123	0.242405	0.27089	0.286548	0.298644	0.309744	0.316866	0.31186	0.316224	0.321258	0.324072	0.334248	0.342179	0.338996	0.350451	0.170509	0.169204	0.172625
520	0.087919	0.103024	0.243165	0.271787	0.28735	0.299329	0.310862	0.317498	0.312442	0.316905	0.32204	0.324843	0.334955	0.343022	0.339717	0.350868	0.171232	0.169921	0.173442
521	0.089251	0.10436	0.244223	0.272656	0.288102	0.30033	0.311754	0.318649	0.313509	0.317672	0.32291	0.325813	0.336	0.344121	0.340405	0.351663	0.172293	0.170999	0.174321
522	0.090582	0.105838	0.245143	0.273924	0.288991	0.301417	0.312924	0.319846	0.314489	0.318671	0.323828	0.326951	0.337045	0.345295	0.341503	0.352697	0.173636	0.172226	0.175468
523	0.091988	0.107422	0.246184	0.274828	0.290184	0.302468	0.313896	0.320899	0.315596	0.319926	0.325121	0.328052	0.338027	0.346341	0.342431	0.353658	0.174671	0.173498	0.176748
524	0.09367	0.109034	0.247577	0.276166	0.2914	0.303729	0.315343	0.32225	0.316811	0.321125	0.326731	0.329308	0.339364	0.347531	0.343579	0.354893	0.176109	0.175246	0.178136
525	0.095354	0.110955	0.249061	0.277671	0.293048	0.305275	0.316781	0.323896	0.31846	0.322572	0.32815	0.330974	0.340709	0.348781	0.344988	0.356157	0.177659	0.176686	0.179457
526	0.097113	0.11266	0.250666	0.279105	0.294346	0.306723	0.318191	0.32545	0.320059	0.323889	0.329593	0.332401	0.342157	0.350313	0.346225	0.357416	0.178968	0.178326	0.180896
527	0.098972	0.114853	0.252377	0.280898	0.295832	0.308398	0.320007	0.327358	0.32175	0.325853	0.331133	0.33405	0.34374	0.351861	0.347829	0.358743	0.180311	0.180053	0.182677
528	0.101278	0.117223	0.254308	0.282953	0.297698	0.310333	0.321915	0.329386	0.323555	0.327579	0.332882	0.335947	0.345672	0.353741	0.349755	0.360628	0.182491	0.182157	0.184665
529	0.10354	0.119535	0.25621	0.284695	0.299522	0.3122	0.323764	0.331407	0.325322	0.32934	0.33467	0.33767	0.347441	0.3553	0.351378	0.362124	0.184262	0.183948	0.186422
530	0.105886	0.121914	0.258381	0.286732	0.301543	0.314033	0.325628	0.333511	0.327253	0.331152	0.33648	0.339636	0.349414	0.357246	0.353371	0.363859	0.186377	0.185986	0.188405
531	0.10853	0.124889	0.260485	0.289076	0.303516	0.316412	0.327624	0.335489	0.329277	0.333289	0.338465	0.341646	0.35146	0.35909	0.355386	0.365726	0.188656	0.188242	0.190589
532	0.111253	0.127818	0.262964	0.291522	0.305875	0.31863	0.330187	0.338055	0.331679	0.335527	0.340774	0.344006	0.353856	0.361166	0.357682	0.367989	0.19091	0.190632	0.193065
533	0.114164	0.13085	0.265649	0.294255	0.308195	0.321277	0.332556	0.340873	0.334217	0.338085	0.343467	0.346774	0.356364	0.363377	0.359888	0.370211	0.193544	0.193271	0.195754
534	0.11719	0.134103	0.268388	0.296971	0.310869	0.324099	0.335322	0.34362	0.336854	0.340578	0.345774	0.349252	0.358709	0.366074	0.362436	0.372665	0.196394	0.196133	0.198436
535	0.12102	0.13765	0.271305	0.299959	0.313732	0.327019	0.338196	0.346613	0.339725	0.343406	0.3488	0.352154	0.361559	0.369084	0.365361	0.375302	0.199399	0.19913	0.201445
536	0.124529	0.141434	0.274483	0.302994	0.316797	0.330142	0.341343	0.34982	0.342772	0.346262	0.351649	0.355217	0.364385	0.371942	0.368363	0.378208	0.202399	0.202305	0.204346
537	0.128158	0.1453	0.277796	0.306446	0.319864	0.33356	0.344692	0.353149	0.345999	0.349411	0.35486	0.358289	0.36765	0.375143	0.371441	0.381289	0.205824	0.205609	0.207673
538	0.13215	0.149235	0.281424	0.309778	0.323208	0.33678	0.347791	0.35657	0.349193	0.352776	0.357867	0.361563	0.370847	0.378218	0.374404	0.384292	0.209118	0.208982	0.211075
539	0.136285	0.153562	0.285019	0.31336	0.326635	0.340314	0.351611	0.360074	0.352735	0.355869	0.361183	0.364853	0.374271	0.381444	0.377589	0.387353	0.212757	0.212524	0.214558
540	0.140571	0.157789	0.288726	0.316999	0.330087	0.343996	0.355114	0.363914	0.356339	0.359325	0.364611	0.368447	0.377875	0.384847	0.381048	0.390809	0.216358	0.216157	0.21798
541	0.144979	0.162561	0.292929	0.320972	0.334048	0.347831	0.359375	0.367981	0.360145	0.363074	0.368362	0.372225	0.381395	0.388481	0.384718	0.394428	0.220399	0.220114	0.221891
542	0.149871	0.167505	0.296932	0.325197	0.338092	0.351845	0.363237	0.371842	0.363887	0.367041	0.372188	0.376091	0.385252	0.392298	0.388641	0.397981	0.22428	0.224408	0.226044
543	0.154818	0.172683	0.301342	0.329539	0.342065	0.356119	0.367547	0.376167	0.368087	0.371251	0.376215	0.380339	0.389361	0.396213	0.392783	0.40187	0.228721	0.228555	0.230257
544	0.159891	0.177894	0.305859	0.333858	0.346338	0.360591	0.371845	0.380596	0.372459	0.375368	0.380374	0.384667	0.393593	0.400356	0.396813	0.40594	0.23327	0.233264	0.234872
545	0.165267	0.183461	0.310841	0.338835	0.35071	0.365299	0.376699	0.385437	0.377109	0.380273	0.385006	0.389326	0.398306	0.404716	0.40124	0.41029	0.238114	0.238169	0.239554
546	0.170967	0.189355	0.315946	0.343835	0.355731	0.370281	0.381714	0.39036	0.382084	0.385193	0.389625	0.394022	0.403001	0.40931	0.405769	0.414802	0.243093	0.24328	0.244631
547	0.176748	0.195566	0.321147	0.348917	0.360531	0.37521	0.386715	0.395589	0.386935	0.389931	0.394472	0.398921	0.407739	0.414099	0.410633	0.419648	0.248219	0.248454	0.249702
548	0.183062	0.201783	0.32661	0.354278	0.365779	0.380486	0.391908	0.401022	0.39219	0.39503	0.399477	0.404107	0.412862	0.419021	0.415566	0.424331	0.253919	0.25375	0.255109
549	0.18918	0.208263	0.331899	0.359679	0.37091	0.385636	0.397066	0.406147	0.397251	0.400159	0.404417	0.409182	0.417856	0.42374	0.420231	0.429101	0.2591	0.259164	0.260414
550	0.195468	0.21464	0.337518	0.365579	0.376478	0.391407	0.402552	0.411651	0.402677	0.405344	0.409549	0.414564	0.423083	0.428679	0.42548	0.433957	0.264724	0.26485	0.265936
551	0.202055	0.221367	0.343339	0.371119	0.381882	0.396921	0.408168	0.417136	0.407942	0.410692	0.414716	0.420032	0.428493	0.434096	0.4307	0.438933	0.270312	0.270686	0.271641
552	0.208857	0.228145	0.349057	0.376881	0.387292	0.402357	0.413792	0.422856	0.413522	0.416165	0.420079	0.425366	0.433793	0.439262	0.435819	0.444077	0.276159	0.276426	0.27725
553	0.215301	0.235125	0.355255	0.383002	0.393096	0.408265	0.419822	0.428555	0.419452	0.421828	0.425663	0.430969	0.43931	0.44476	0.441325	0.449344	0.282325	0.282485	0.283331
554	0.222119	0.242231	0.361291	0.389122	0.398969	0.413951	0.425631	0.434547	0.424979	0.427373	0.431288	0.436405	0.44487	0.450163	0.446593	0.454713	0.288154	0.28853	0.289083
555	0.229155	0.249411	0.367478	0.395144	0.404976	0.419771	0.431661	0.440403	0.43072	0.43307	0.436854	0.442012	0.450741	0.455701	0.452222	0.459941	0.294362	0.294701	0.295293
556	0.236361	0.256862	0.373799	0.401302	0.41099	0.425809	0.437528	0.446579	0.436682	0.438952	0.442726	0.447937	0.456466	0.461283	0.457691	0.465372	0.300463	0.300945	0.301426
557	0.2438	0.264548	0.380389	0.407754	0.417176	0.432167	0.443743	0.452836	0.442803	0.444973	0.448586	0.453802	0.462235	0.467212	0.463403	0.470981	0.306743	0.307303	0.307701
558	0.25135	0.272369	0.386843	0.414356	0.423383	0.438647	0.450221	0.459106	0.448933	0.451016	0.45461	0.459977	0.468236	0.4732	0.469331	0.476791	0.313493	0.313947	0.314209
559	0.259148	0.280165	0.393457	0.42099	0.429653	0.445186	0.456657	0.465608	0.455171	0.457054	0.460637	0.466062	0.474355	0.479105	0.475266	0.482663	0.320068	0.320729	0.320955
560	0.266842	0.288164	0.400234	0.42776	0.436087	0.451586	0.46323	0.472261	0.461448	0.463668	0.466871	0.472352	0.480676	0.48542	0.481381	0.488734	0.326914	0.32777	0.327667
561	0.274647	0.296386	0.407114	0.434902	0.442948	0.458116	0.469779	0.47875	0.468082	0.469914	0.47333	0.478984	0.48689	0.491379	0.48746	0.494436	0.334025	0.33455	0.334347
562	0.282294	0.304252	0.414002	0.441459	0.449246	0.464552	0.476188	0.485057	0.474348	0.47624	0.47976	0.485102	0.493155	0.497414	0.493477	0.50023	0.340654	0.341345	0.341042
563	0.290205	0.312686	0.421076	0.448538	0.455972	0.471274	0.483139	0.49212	0.480883	0.482736	0.486327	0.491794	0.499419	0.503584	0.499823	0.506289	0.3477	0.348182	0.348076
564	0.298434	0.320847	0.428287	0.455523	0.46276	0.477885	0.489942	0.49901	0.487751	0.489303	0.49284	0.498203	0.505898	0.509726	0.505894	0.512325	0.35479	0.35551	0.354781
565	0.306845	0.329356	0.435471	0.462311	0.469545	0.484485	0.496451	0.505713	0.494195	0.495495	0.498961	0.504338	0.512122	0.516055	0.511895	0.518335	0.361827	0.362526	0.36175
566	0.315563	0.338024	0.442684	0.469897	0.47647	0.491109	0.50337	0.512573	0.500936	0.502218	0.505644	0.511223	0.51849	0.522401	0.518239	0.524391	0.368981	0.36985	0.368885
567	0.324232	0.347179	0.450288	0.47727	0.483978	0.498602	0.510498	0.51989	0.508069	0.508928	0.512479	0.51807	0.525297	0.529153	0.524979	0.531057	0.376433	0.377642	0.376274
568	0.333548	0.356344	0.458376	0.485183	0.491613	0.506276	0.518057	0.52734	0.515418	0.516185	0.519812	0.52526	0.532732	0.535881	0.531608	0.537715	0.384352	0.385386	0.383934
569	0.343265	0.366381	0.466859	0.493317	0.499763	0.514234	0.526183	0.535112	0.52309	0.5239	0.527077	0.532617	0.539824	0.543067	0.538889	0.544529	0.392422	0.393806	0.392188
570	0.353327	0.376608	0.475629	0.502091	0.507767	0.522705	0.534567	0.543393	0.531129	0.531778	0.534823	0.540556	0.547819	0.550771	0.546676	0.552063	0.401366	0.402543	0.400658
571	0.364089	0.387415	0.484828	0.510877	0.516428	0.531334	0.543416	0.551986	0.539745	0.540506	0.543419	0.548972	0.556162	0.558748	0.554507	0.560508	0.410451	0.411681	0.409773
572	0.375422	0.398952	0.494139	0.520421	0.525684	0.540295	0.552616	0.561082	0.548932	0.549196	0.551832	0.55774	0.564594	0.567365	0.5629	0.568422	0.419608	0.421118	0.418924
573	0.386718	0.410874	0.504394	0.530318	0.535248	0.549899	0.561841	0.570941	0.557987	0.558482	0.561035	0.566805	0.573595	0.575793	0.571696	0.577067	0.429564	0.431102	0.428776
574	0.398398	0.422796	0.514401	0.540019	0.544774	0.559689	0.571462	0.579958	0.567398	0.56772	0.570186	0.575953	0.582629	0.584561	0.580532	0.585886	0.439383	0.440907	0.438525
575	0.410696	0.435291	0.524832	0.550516	0.555045	0.569947	0.581887	0.590157	0.577577	0.577146	0.580271	0.585936	0.592327	0.593788	0.589936	0.59481	0.450257	0.451423	0.448965
576	0.423461	0.448473	0.536197	0.561572	0.565681	0.580652	0.592507	0.601062	0.587952	0.587149	0.590271	0.595991	0.602143	0.603914	0.599631	0.604629	0.46095	0.462468	0.459652
577	0.43701	0.461907	0.547721	0.572871	0.576742	0.591461	0.603465	0.612023	0.598662	0.598034	0.600865	0.606397	0.612585	0.61396	0.609805	0.614513	0.472348	0.473862	0.470706
578	0.451115	0.475941	0.559369	0.584371	0.587988	0.602873	0.614968	0.623164	0.609342	0.608928	0.611779	0.617232	0.623348	0.624523	0.620222	0.624553	0.483811	0.485497	0.482017
579	0.46607	0.490887	0.572207	0.59694	0.600338	0.615176	0.62714	0.634998	0.621277	0.620928	0.623453	0.628855	0.635054	0.635654	0.631423	0.635835	0.49637	0.497915	0.494116
580	0.480933	0.50675	0.585919	0.610415	0.613055	0.627688	0.639872	0.647634	0.633761	0.632962	0.635555	0.641187	0.64686	0.647531	0.643123	0.646864	0.508925	0.510762	0.50674
581	0.497223	0.522994	0.599592	0.624289	0.626759	0.641075	0.653201	0.660747	0.646496	0.645761	0.648306	0.653687	0.659287	0.659976	0.655783	0.659409	0.522629	0.524656	0.52028
582	0.5143	0.540373	0.614794	0.638858	0.641135	0.655265	0.667615	0.675245	0.660739	0.660079	0.66205	0.667717	0.672443	0.673553	0.668696	0.67226	0.537223	0.539039	0.534409
583	0.53161	0.557605	0.629507	0.653371	0.655062	0.669619	0.681496	0.689393	0.674504	0.673496	0.675547	0.680996	0.68533	0.686157	0.681505	0.68473	0.551623	0.553044	0.548122
584	0.546481	0.573179	0.642614	0.666209	0.667684	0.681935	0.69403	0.701617	0.686613	0.685248	0.687546	0.692467	0.696778	0.698093	0.692531	0.695381	0.564014	0.565646	0.560456
585	0.554094	0.580573	0.648684	0.672142	0.673671	0.687763	0.699644	0.707462	0.692306	0.690798	0.692968	0.698235	0.702638	0.702866	0.697893	0.700845	0.569715	0.571592	0.566426
586	0.585662	0.614498	0.677955	0.701029	0.702023	0.715968	0.728911	0.736378	0.721191	0.71958	0.721634	0.727078	0.73088	0.73142	0.725777	0.72849	0.600466	0.602677	0.597057
587	0.605548	0.635	0.695486	0.71868	0.718966	0.733084	0.746072	0.753574	0.737721	0.736127	0.738004	0.743376	0.74707	0.747759	0.741503	0.743867	0.61762	0.619716	0.614166
588	0.626493	0.65652	0.714007	0.736749	0.736877	0.750957	0.763279	0.770514	0.754784	0.753075	0.754466	0.760019	0.76331	0.76372	0.757711	0.759484	0.635226	0.637401	0.631466
589	0.647872	0.678105	0.732642	0.755313	0.754515	0.768616	0.781076	0.788175	0.771981	0.76976	0.771396	0.776683	0.780063	0.780521	0.77407	0.775547	0.653407	0.65508	0.648728
590	0.669537	0.700124	0.751631	0.77397	0.772475	0.786505	0.799211	0.806028	0.78971	0.787409	0.788908	0.794158	0.797082	0.797585	0.790947	0.792095	0.671413	0.673659	0.666855
591	0.692195	0.722602	0.771186	0.793374	0.791288	0.805424	0.818052	0.824666	0.80796	0.80561	0.807142	0.811952	0.81462	0.814631	0.808212	0.808597	0.689974	0.692411	0.685218
592	0.71569	0.746443	0.79179	0.813395	0.81077	0.825172	0.837615	0.844101	0.826698	0.824008	0.825713	0.830202	0.832979	0.832676	0.825551	0.825776	0.709285	0.711781	0.70413
593	0.740209	0.770692	0.812917	0.834074	0.830922	0.844765	0.857306	0.863177	0.846107	0.842915	0.844714	0.849471	0.851499	0.85129	0.844168	0.843703	0.729436	0.731857	0.723791
594	0.765302	0.795338	0.834209	0.854856	0.851761	0.865245	0.87785	0.883952	0.86583	0.862759	0.864494	0.869159	0.87095	0.870676	0.862863	0.862515	0.749747	0.752483	0.743581
595	0.790915	0.820497	0.856288	0.876867	0.872832	0.886162	0.899074	0.904764	0.886625	0.883441	0.884482	0.888664	0.890967	0.889725	0.882208	0.880932	0.770878	0.773002	0.764083
596	0.816458	0.846461	0.878469	0.898542	0.894043	0.90708	0.92037	0.925433	0.906822	0.902981	0.90422	0.908343	0.910671	0.909181	0.901347	0.899378	0.791213	0.79416	0.784608
597	0.841895	0.871796	0.900366	0.919868	0.914549	0.927552	0.940683	0.945669	0.926862	0.923415	0.923998	0.927674	0.929382	0.928075	0.920357	0.917869	0.812175	0.814697	0.80478
598	0.866607	0.896091	0.92102	0.94069	0.934642	0.947537	0.960893	0.965749	0.946156	0.942283	0.943293	0.946868	0.948541	0.946603	0.938937	0.9356	0.832365	0.834717	0.82408
599	0.891308	0.919944	0.942334	0.96122	0.954707	0.96726	0.980582	0.985443	0.965278	0.961652	0.962175	0.965543	0.966741	0.96504	0.956709	0.953454	0.851769	0.854194	0.843452
600	0.915295	0.943447	0.962939	0.981271	0.973968	0.987191	0.999792	1.00411	0.984481	0.980179	0.980272	0.983239	0.984419	0.982602	0.973882	0.970631	0.871002	0.873504	0.862427
601	0.93844	0.965905	0.98248	1.00021	0.992723	1.00562	1.01797	1.02195	1.002	0.997935	0.998003	1.00089	1.00154	0.999609	0.990832	0.986509	0.889112	0.891482	0.880031
602	0.960782	0.98739	1.00088	1.01817	1.01048	1.02312	1.03582	1.03932	1.01887	1.01471	1.01443	1.01774	1.01833	1.01559	1.00709	1.00282	0.906672	0.90884	0.897164
603	0.981972	1.00796	1.01872	1.03583	1.02748	1.03995	1.05236	1.05605	1.03493	1.03058	1.03072	1.03317	1.03342	1.03103	1.02258	1.01734	0.923056	0.925238	0.913097
604	1.00157	1.02664	1.03512	1.0526	1.04357	1.05593	1.06787	1.07198	1.05019	1.04576	1.04527	1.04779	1.04793	1.04512	1.03719	1.03116	0.93827	0.940946	0.928982
605	1.02035	1.0449	1.05108	1.06732	1.05846	1.07083	1.08272	1.08659	1.06431	1.05964	1.05933	1.06197	1.06192	1.05924	1.05075	1.04403	0.953233	0.955426	0.943077
606	1.03778	1.061	1.06511	1.08167	1.07199	1.08429	1.09559	1.10022	1.07769	1.07305	1.07254	1.07494	1.07462	1.07156	1.06323	1.05616	0.966493	0.968752	0.956711
607	1.0531	1.07527	1.07777	1.09398	1.08401	1.09635	1.10834	1.11212	1.08979	1.08439	1.08335	1.08526	1.0855	1.08287	1.07376	1.0661	0.978392	0.980592	0.968204
608	1.06567	1.08741	1.08872	1.10461	1.09465	1.10616	1.11835	1.12193	1.09915	1.09444	1.0934	1.09478	1.09446	1.09165	1.08342	1.07491	0.988356	0.991059	0.978312
609	1.07642	1.09777	1.09769	1.11334	1.10305	1.11515	1.12645	1.12969	1.10737	1.10226	1.10127	1.10299	1.10218	1.0989	1.0905	1.0832	0.997157	0.999102	0.985859
610	1.08562	1.10482	1.10475	1.12045	1.11055	1.12178	1.13397	1.13681	1.11448	1.10882	1.10786	1.1086	1.10841	1.10502	1.09621	1.08853	1.00411	1.00609	0.992936
611	1.09211	1.11151	1.11038	1.12563	1.11583	1.12675	1.13937	1.14187	1.11984	1.11457	1.1124	1.11391	1.11345	1.11031	1.10098	1.09331	1.00909	1.01127	0.998506
612	1.09664	1.11572	1.11418	1.12941	1.11993	1.13055	1.14255	1.14534	1.12276	1.1183	1.11639	1.11703	1.11692	1.11356	1.10475	1.09675	1.01337	1.01466	1.00237
613	1.09972	1.11792	1.11671	1.13194	1.12256	1.13307	1.145	1.14768	1.12566	1.12053	1.1193	1.12017	1.11919	1.11575	1.10639	1.09937	1.01607	1.01712	1.00479
614	1.10147	1.1196	1.11816	1.1336	1.12346	1.13457	1.14586	1.14983	1.12658	1.12225	1.12037	1.12152	1.12072	1.11702	1.10781	1.10099	1.01744	1.01901	1.0065
615	1.10273	1.1196	1.11846	1.13383	1.12415	1.13427	1.14629	1.14922	1.12723	1.1226	1.12097	1.12176	1.12041	1.11696	1.10837	1.10126	1.01788	1.02023	1.00739
616	1.10109	1.11856	1.11804	1.13325	1.12434	1.13392	1.14611	1.14886	1.12694	1.12242	1.12054	1.12111	1.12076	1.11693	1.10779	1.10113	1.01775	1.01906	1.00714
617	1.10026	1.11641	1.1169	1.13212	1.12322	1.13302	1.14469	1.14796	1.1255	1.12155	1.11945	1.12037	1.11945	1.11628	1.10719	1.10038	1.0172	1.01899	1.00666
618	1.09826	1.11455	1.11471	1.13035	1.12203	1.13105	1.14346	1.14637	1.12457	1.12065	1.11823	1.11937	1.1182	1.11474	1.10614	1.09937	1.01628	1.01767	1.00552
619	1.0963	1.11179	1.11292	1.12857	1.12074	1.12954	1.14206	1.14498	1.12336	1.11879	1.11663	1.11799	1.11706	1.11379	1.10429	1.09786	1.01493	1.01659	1.00463
620	1.09429	1.10906	1.11093	1.12692	1.11919	1.12765	1.1407	1.1432	1.12224	1.11791	1.11499	1.1162	1.11536	1.11165	1.10254	1.09655	1.01381	1.01512	1.00372
621	1.09285	1.10746	1.10995	1.1256	1.118	1.12668	1.13942	1.1414	1.12047	1.11717	1.11453	1.11495	1.11382	1.11075	1.10138	1.09584	1.01293	1.01401	1.00284
622	1.09199	1.10545	1.10922	1.12466	1.11754	1.12546	1.138	1.14085	1.11982	1.11643	1.11363	1.11441	1.11342	1.1098	1.10097	1.09546	1.01246	1.01359	1.00274
623	1.09143	1.10534	1.10855	1.12453	1.1176	1.12521	1.13781	1.14113	1.11954	1.11656	1.11359	1.11404	1.11322	1.11001	1.10063	1.09512	1.01271	1.01393	1.00249
624	1.09271	1.10497	1.10906	1.12585	1.11826	1.12616	1.13832	1.14104	1.12078	1.11761	1.11445	1.11445	1.11397	1.11035	1.10147	1.09614	1.01336	1.0145	1.00317
625	1.09512	1.10697	1.11018	1.12686	1.11939	1.1277	1.13996	1.14274	1.12233	1.11881	1.1158	1.11596	1.11479	1.11167	1.10296	1.09737	1.01515	1.01634	1.00552
626	1.098	1.1097	1.11292	1.12936	1.1227	1.12996	1.14257	1.14472	1.12507	1.12206	1.11867	1.11856	1.11749	1.11379	1.10523	1.10035	1.01822	1.01883	1.00816
627	1.10304	1.11378	1.11708	1.13282	1.12664	1.13403	1.14606	1.14877	1.12887	1.1256	1.12258	1.12199	1.12178	1.11725	1.10886	1.10337	1.02188	1.02224	1.01217
628	1.10914	1.11924	1.12243	1.13819	1.13201	1.13922	1.15019	1.15415	1.13358	1.13071	1.12723	1.12733	1.12609	1.12219	1.11333	1.10844	1.02664	1.02789	1.01701
629	1.11755	1.12662	1.12912	1.14433	1.13827	1.14571	1.15752	1.15986	1.13973	1.13721	1.13412	1.13339	1.13271	1.12844	1.11965	1.11523	1.03364	1.03386	1.02356
630	1.1273	1.13563	1.13743	1.15195	1.14683	1.15367	1.16496	1.16866	1.14818	1.14515	1.14128	1.14175	1.13979	1.13563	1.1271	1.1224	1.04173	1.04168	1.03164
631	1.14013	1.14701	1.14708	1.16301	1.15624	1.16321	1.17414	1.17761	1.15697	1.15399	1.15067	1.14983	1.14832	1.14435	1.13563	1.13032	1.05075	1.05081	1.04137
632	1.15474	1.15918	1.15939	1.17412	1.16741	1.17361	1.18529	1.18866	1.16735	1.1655	1.16129	1.16032	1.15862	1.15457	1.1456	1.14114	1.06224	1.06187	1.05167
633	1.17014	1.17382	1.17169	1.18727	1.18058	1.18694	1.19858	1.20032	1.1792	1.17719	1.17256	1.17224	1.17044	1.16589	1.15641	1.15139	1.07381	1.07416	1.06368
634	1.18751	1.18951	1.18638	1.20138	1.19443	1.20032	1.21205	1.21335	1.19199	1.19043	1.18577	1.18453	1.18289	1.17786	1.16895	1.16316	1.0866	1.08714	1.07678
635	1.2071	1.20681	1.20202	1.21704	1.20954	1.21491	1.22632	1.22804	1.2068	1.20437	1.20009	1.19833	1.19694	1.19071	1.18208	1.1765	1.10041	1.101	1.09077
636	1.22795	1.22638	1.21874	1.23361	1.22601	1.2317	1.24263	1.24403	1.22212	1.21975	1.21466	1.21365	1.21197	1.20575	1.197	1.19059	1.11645	1.11681	1.10623
637	1.25038	1.24641	1.23708	1.25179	1.24323	1.24871	1.25937	1.26074	1.23872	1.23596	1.23143	1.23005	1.22839	1.22189	1.21249	1.20621	1.13341	1.13315	1.12253
638	1.27478	1.26924	1.2565	1.27012	1.26197	1.26732	1.27762	1.27843	1.25672	1.25317	1.24857	1.24754	1.24414	1.23846	1.2288	1.22263	1.15086	1.15076	1.1396
639	1.30196	1.29298	1.27736	1.29185	1.28217	1.28692	1.29695	1.29773	1.27504	1.27275	1.26711	1.26506	1.26226	1.25563	1.24631	1.23971	1.16879	1.16906	1.15775
640	1.32912	1.31718	1.30004	1.31238	1.30442	1.30844	1.31792	1.31795	1.29544	1.29211	1.28756	1.28406	1.28136	1.27506	1.26528	1.25829	1.18919	1.18929	1.17726
641	1.35895	1.34359	1.32308	1.33533	1.32673	1.33107	1.34056	1.3403	1.31705	1.31301	1.30728	1.30572	1.30176	1.29489	1.28407	1.27733	1.21057	1.20978	1.19835
642	1.39045	1.37143	1.34847	1.3595	1.35031	1.35441	1.36418	1.36347	1.33953	1.33557	1.32862	1.32673	1.32264	1.31582	1.3049	1.29792	1.23223	1.23168	1.21986
643	1.42567	1.40069	1.37378	1.38479	1.37474	1.37956	1.38675	1.38633	1.36238	1.35799	1.35149	1.3489	1.34536	1.33692	1.32559	1.31836	1.25468	1.25361	1.24169
644	1.45933	1.43069	1.40043	1.41063	1.39999	1.40299	1.4112	1.40998	1.38494	1.37997	1.37402	1.37132	1.36668	1.3591	1.34818	1.34006	1.27828	1.2764	1.26434
645	1.49336	1.4608	1.42688	1.43614	1.42483	1.42807	1.43503	1.43308	1.40887	1.40271	1.39739	1.39324	1.38847	1.38046	1.37047	1.36042	1.30074	1.30095	1.28683
646	1.52784	1.49099	1.45276	1.46094	1.45067	1.45161	1.45743	1.45761	1.43208	1.42507	1.41877	1.41431	1.41021	1.40193	1.39122	1.38111	1.32263	1.32182	1.3088
647	1.5631	1.51984	1.47776	1.488	1.47423	1.47591	1.48152	1.47958	1.45441	1.44746	1.44071	1.43661	1.43208	1.42391	1.41172	1.40143	1.34453	1.34389	1.33143
648	1.59874	1.5504	1.50247	1.51198	1.49875	1.49954	1.50449	1.5019	1.47579	1.47104	1.46243	1.45749	1.45273	1.4452	1.43289	1.42208	1.36728	1.36639	1.35158
649	1.63364	1.57766	1.5282	1.53566	1.52137	1.52111	1.52712	1.52486	1.49842	1.49273	1.48337	1.47833	1.47283	1.46534	1.45199	1.44111	1.38715	1.38553	1.37303
650	1.66944	1.60583	1.55208	1.55836	1.54509	1.54399	1.54941	1.5458	1.51837	1.51247	1.50326	1.49883	1.49243	1.48242	1.4712	1.46	1.40766	1.40579	1.39283
651	1.70258	1.63341	1.57473	1.58242	1.56616	1.56634	1.57011	1.56678	1.53802	1.53175	1.52296	1.517	1.51055	1.5018	1.48987	1.47747	1.42726	1.42409	1.41135
652	1.73576	1.65889	1.5982	1.60213	1.58754	1.58554	1.59085	1.58563	1.55728	1.55275	1.54081	1.5346	1.52935	1.52024	1.50763	1.49477	1.44492	1.44358	1.43008
653	1.76784	1.68575	1.6218	1.6257	1.60827	1.60739	1.6107	1.60457	1.57525	1.56944	1.55903	1.55257	1.54695	1.53849	1.52429	1.51131	1.46412	1.46135	1.44789
654	1.80241	1.71169	1.64059	1.648	1.62962	1.62726	1.62958	1.62379	1.59563	1.58747	1.57486	1.56865	1.56369	1.55521	1.54217	1.52838	1.48202	1.47918	1.46431
655	1.83406	1.73417	1.66159	1.66678	1.64884	1.64746	1.64822	1.64346	1.61188	1.60491	1.59081	1.58619	1.579	1.57039	1.55673	1.54219	1.49705	1.49585	1.48102
656	1.86533	1.75688	1.68049	1.68444	1.66605	1.66378	1.66357	1.65823	1.62615	1.6182	1.60654	1.60094	1.59361	1.58514	1.5695	1.55588	1.51264	1.51051	1.49586
657	1.89247	1.77624	1.69855	1.69954	1.67948	1.67744	1.6781	1.67432	1.64138	1.63388	1.61985	1.6145	1.60613	1.5974	1.58218	1.56954	1.52504	1.52422	1.50852
658	1.91732	1.79282	1.71269	1.7155	1.6958	1.6945	1.69176	1.68898	1.65396	1.64655	1.63233	1.62497	1.61693	1.60829	1.59385	1.58027	1.53857	1.53494	1.52124
659	1.938	1.80901	1.72746	1.72738	1.70836	1.70456	1.70502	1.69868	1.66429	1.6558	1.64354	1.63603	1.6262	1.61977	1.60466	1.59038	1.54788	1.54552	1.52956
660	1.95796	1.82242	1.73736	1.73937	1.71755	1.71309	1.71283	1.70723	1.67457	1.66551	1.65254	1.64543	1.63348	1.62581	1.61172	1.59855	1.55651	1.55346	1.53955
661	1.97095	1.8339	1.74723	1.74409	1.72713	1.72141	1.72057	1.71437	1.68004	1.67272	1.65732	1.65163	1.64067	1.63344	1.61797	1.6023	1.56366	1.56002	1.54571
662	1.98108	1.83773	1.75243	1.75144	1.72905	1.7262	1.72644	1.71764	1.68608	1.67589	1.66109	1.65414	1.64493	1.63719	1.62168	1.60715	1.5675	1.56463	1.55023
663	1.98492	1.83777	1.75434	1.75194	1.73079	1.72693	1.72747	1.71963	1.68683	1.67602	1.66497	1.65614	1.64611	1.63806	1.62342	1.60901	1.57021	1.56726	1.55139
664	1.97792	1.83378	1.75181	1.75124	1.72727	1.7244	1.7236	1.71651	1.68447	1.67393	1.66222	1.6558	1.64475	1.63696	1.62012	1.6069	1.56836	1.56521	1.54823
665	1.96321	1.82652	1.74377	1.74326	1.72236	1.71693	1.71628	1.71151	1.6794	1.66775	1.65773	1.64883	1.63834	1.63135	1.61733	1.60063	1.56214	1.56123	1.5446
666	1.94214	1.81195	1.72978	1.73076	1.71136	1.70613	1.70636	1.70073	1.6671	1.65892	1.64613	1.63971	1.63056	1.62275	1.6082	1.59256	1.55205	1.54903	1.53455
667	1.91018	1.78872	1.71203	1.71346	1.6934	1.68872	1.69002	1.68398	1.65272	1.64367	1.63138	1.62312	1.61555	1.60909	1.59358	1.57835	1.53827	1.53541	1.52005
668	1.86928	1.75599	1.68588	1.6887	1.67042	1.66556	1.66765	1.66351	1.63183	1.62186	1.61018	1.60436	1.59503	1.59027	1.57498	1.56124	1.51892	1.51526	1.50211
669	1.81734	1.71901	1.65619	1.65901	1.63924	1.63641	1.6392	1.63403	1.60383	1.59601	1.58429	1.57958	1.57302	1.56604	1.55068	1.53838	1.49457	1.49117	1.47793
670	1.76151	1.67578	1.6174	1.62113	1.60489	1.601	1.60608	1.60237	1.57351	1.56564	1.55418	1.55097	1.54279	1.53673	1.52143	1.5077	1.46478	1.46286	1.44825
671	1.69679	1.62346	1.57286	1.58107	1.56525	1.5627	1.56937	1.56463	1.53631	1.5301	1.51817	1.51536	1.50844	1.50405	1.48801	1.47572	1.42801	1.42729	1.41413
672	1.62798	1.56785	1.52443	1.53407	1.51912	1.51686	1.52413	1.52154	1.49346	1.48824	1.47779	1.47453	1.46836	1.46349	1.44951	1.4379	1.38891	1.38711	1.37421
673	1.55584	1.50629	1.47017	1.48047	1.46857	1.46703	1.47649	1.47347	1.44708	1.4417	1.43153	1.42959	1.42283	1.41956	1.4065	1.39584	1.3451	1.34223	1.33043
674	1.47631	1.43948	1.41182	1.42338	1.41381	1.41193	1.42331	1.42128	1.39591	1.39066	1.38219	1.37974	1.37469	1.37168	1.35776	1.34828	1.29406	1.29273	1.28086
675	1.39555	1.36998	1.35089	1.36249	1.3537	1.35506	1.36464	1.36472	1.33978	1.33746	1.32846	1.32552	1.32181	1.31909	1.30667	1.29841	1.24107	1.23978	1.229
676	1.31454	1.2968	1.28539	1.29855	1.2916	1.2929	1.30426	1.30518	1.28083	1.27771	1.27066	1.269	1.26597	1.26521	1.25196	1.24496	1.18493	1.18341	1.17233
677	1.23163	1.22082	1.21733	1.23237	1.22646	1.22897	1.24126	1.24212	1.2194	1.21785	1.21141	1.21009	1.20773	1.20654	1.1949	1.1871	1.12429	1.12272	1.11372
678	1.14798	1.14289	1.14781	1.16417	1.15927	1.16342	1.17663	1.17856	1.15632	1.1542	1.14822	1.14752	1.1466	1.14525	1.1343	1.12748	1.06092	1.05914	1.05114
679	1.06507	1.06571	1.0781	1.09486	1.09339	1.09681	1.10997	1.11266	1.09122	1.09004	1.08408	1.08371	1.08397	1.08293	1.07206	1.06706	0.996509	0.994833	0.987974
680	0.98612	0.988868	1.00945	1.02691	1.02608	1.02996	1.04391	1.04547	1.0259	1.02525	1.02016	1.02039	1.02043	1.02091	1.01109	1.00699	0.933631	0.932199	0.92566
681	0.910343	0.915081	0.941814	0.960071	0.961259	0.966117	0.980586	0.982956	0.964347	0.963679	0.959875	0.960875	0.96142	0.962149	0.952347	0.949651	0.872185	0.871021	0.865092
682	0.837649	0.844774	0.879525	0.897781	0.900176	0.90497	0.91979	0.923704	0.90557	0.905419	0.901728	0.902646	0.903424	0.904789	0.895505	0.893676	0.812763	0.811148	0.806128
683	0.769225	0.779645	0.819493	0.837931	0.842648	0.846804	0.862266	0.86644	0.847777	0.848859	0.845761	0.847237	0.848797	0.850868	0.840943	0.84034	0.756271	0.755066	0.751313
684	0.705914	0.717708	0.76232	0.782354	0.787457	0.792018	0.80685	0.811148	0.794362	0.794886	0.79246	0.794159	0.796843	0.799435	0.790707	0.790589	0.703308	0.701596	0.698839
685	0.645789	0.658781	0.709095	0.729032	0.735186	0.739911	0.755725	0.759729	0.74385	0.744955	0.742755	0.744844	0.747602	0.750506	0.742078	0.743094	0.65269	0.651457	0.649004
686	0.588949	0.603814	0.658895	0.679406	0.686293	0.691661	0.707145	0.712244	0.696576	0.697296	0.695691	0.698087	0.701399	0.704563	0.695832	0.697689	0.605446	0.603765	0.602175
687	0.536435	0.552589	0.612691	0.633544	0.640726	0.646222	0.662547	0.666796	0.651378	0.652608	0.651185	0.65469	0.657944	0.661753	0.653648	0.655669	0.560504	0.55967	0.558278
688	0.4883	0.504685	0.568651	0.590006	0.5979	0.603839	0.620214	0.624301	0.609993	0.610903	0.610135	0.6138	0.617586	0.621368	0.613566	0.616799	0.519277	0.518021	0.517206
689	0.44369	0.459733	0.527544	0.549532	0.558483	0.563857	0.580312	0.58528	0.570893	0.572103	0.571781	0.575405	0.579664	0.584031	0.576202	0.579926	0.480436	0.479212	0.478499
690	0.401431	0.418101	0.489752	0.512312	0.521397	0.526633	0.543238	0.548775	0.534896	0.535997	0.535471	0.539267	0.543653	0.548271	0.540744	0.545091	0.443467	0.442492	0.442466
691	0.363153	0.380415	0.45539	0.477884	0.487692	0.492836	0.509699	0.514569	0.501472	0.50254	0.502548	0.50671	0.511237	0.516317	0.509396	0.514104	0.410689	0.409601	0.410438
692	0.329604	0.346423	0.423737	0.446115	0.456821	0.462433	0.479538	0.484437	0.471492	0.472677	0.473165	0.47749	0.482366	0.487727	0.480744	0.486135	0.380897	0.380193	0.380636
693	0.298832	0.315252	0.395581	0.41813	0.428878	0.434889	0.452342	0.457623	0.444867	0.446151	0.446516	0.451114	0.455834	0.461954	0.454978	0.460527	0.353864	0.353278	0.354316
694	0.271037	0.288001	0.370554	0.393503	0.404683	0.410703	0.427688	0.433248	0.42081	0.421895	0.422556	0.427678	0.432301	0.438782	0.431827	0.437661	0.33004	0.329396	0.330844
695	0.246625	0.263497	0.347813	0.370888	0.382376	0.388234	0.405308	0.411	0.398645	0.399724	0.400644	0.405859	0.410656	0.417473	0.410196	0.416915	0.308237	0.307758	0.309325
696	0.224694	0.241234	0.327293	0.350748	0.36242	0.368263	0.385751	0.391042	0.378989	0.380233	0.381506	0.386801	0.391986	0.398632	0.391797	0.398573	0.288941	0.288231	0.290092
697	0.204405	0.221068	0.308872	0.332423	0.344276	0.350304	0.36786	0.373476	0.361408	0.36246	0.364133	0.369422	0.374658	0.381579	0.374808	0.381834	0.271195	0.270667	0.272645
698	0.186234	0.203395	0.292315	0.316186	0.328238	0.334304	0.351661	0.357546	0.345683	0.346733	0.348366	0.353879	0.359173	0.366088	0.359283	0.366557	0.255553	0.254759	0.257027
699	0.170151	0.186837	0.277399	0.301233	0.313489	0.31933	0.336946	0.342924	0.331146	0.332175	0.333803	0.339277	0.34494	0.352191	0.345535	0.35302	0.241196	0.240336	0.24286
700	0.155598	0.171829	0.263518	0.287379	0.300081	0.305726	0.323594	0.329528	0.318138	0.318653	0.320694	0.326446	0.33225	0.339489	0.332934	0.340642	0.22841	0.227364	0.229878
701	0.14214	0.158112	0.251046	0.275015	0.288029	0.293689	0.311557	0.317591	0.306105	0.306805	0.308873	0.314909	0.320489	0.327827	0.321199	0.329153	0.216578	0.215447	0.218281
702	0.129811	0.145976	0.240024	0.263954	0.276934	0.28268	0.300619	0.306501	0.29497	0.295887	0.298022	0.303975	0.309721	0.317262	0.310924	0.318793	0.205735	0.20474	0.207592
703	0.118916	0.134913	0.229911	0.253703	0.266886	0.27257	0.290471	0.2965	0.284933	0.285729	0.288231	0.294253	0.299992	0.307744	0.301546	0.309489	0.195919	0.194993	0.197947
704	0.109254	0.125053	0.220626	0.244567	0.257853	0.263457	0.281588	0.287576	0.276166	0.276907	0.279528	0.285501	0.291393	0.299237	0.292947	0.301137	0.187282	0.186304	0.189283
705	0.100567	0.116158	0.212541	0.236194	0.249865	0.255612	0.273673	0.279848	0.268446	0.268933	0.271888	0.277752	0.283705	0.291538	0.285172	0.293499	0.179512	0.178387	0.18155
706	0.092563	0.108211	0.205275	0.229122	0.242835	0.248338	0.266548	0.272813	0.261298	0.261875	0.264913	0.270815	0.276697	0.284748	0.278282	0.286789	0.172541	0.17139	0.17476
707	0.08579	0.101167	0.198748	0.222471	0.236282	0.24172	0.260181	0.266396	0.2548	0.255343	0.258501	0.264355	0.27044	0.27838	0.272158	0.280786	0.166354	0.165313	0.168597
708	0.079516	0.094611	0.192671	0.216404	0.230313	0.235712	0.254136	0.260467	0.248965	0.249585	0.252742	0.258636	0.264681	0.272717	0.26643	0.275293	0.160519	0.159496	0.163033
709	0.073799	0.088803	0.187315	0.211014	0.225049	0.230383	0.248857	0.255158	0.24367	0.244352	0.247563	0.253484	0.25968	0.267646	0.261246	0.270273	0.155457	0.154353	0.158101
710	0.068783	0.083629	0.182436	0.20609	0.22031	0.225502	0.24421	0.250446	0.239024	0.239588	0.242862	0.248685	0.254796	0.263132	0.25681	0.265731	0.150761	0.149755	0.153538
711	0.064152	0.078802	0.177903	0.201603	0.215771	0.221135	0.239773	0.246037	0.234591	0.235139	0.238404	0.24436	0.250515	0.258801	0.252567	0.261638	0.146636	0.145462	0.149353
712	0.059976	0.074278	0.173794	0.197375	0.211792	0.216917	0.235625	0.242035	0.230446	0.231049	0.23455	0.240388	0.246429	0.254859	0.248523	0.257686	0.142627	0.141495	0.145482
713	0.055902	0.070217	0.170055	0.193528	0.207893	0.213161	0.231862	0.238244	0.226699	0.227254	0.230761	0.236615	0.242703	0.251176	0.244925	0.254068	0.139087	0.137934	0.141881
714	0.05247	0.066494	0.166552	0.190023	0.204471	0.209906	0.228407	0.234824	0.223218	0.223908	0.227273	0.233281	0.23932	0.247771	0.24168	0.250581	0.135759	0.134696	0.138713
715	0.049197	0.063032	0.163236	0.186724	0.201141	0.206546	0.225234	0.231619	0.219976	0.220675	0.224029	0.23	0.23611	0.244676	0.238524	0.247453	0.132603	0.131549	0.135736
716	0.046214	0.060056	0.160415	0.183845	0.198381	0.2039	0.222466	0.228722	0.217267	0.217957	0.221343	0.227314	0.233371	0.241976	0.235941	0.244791	0.129962	0.128942	0.133177
717	0.043515	0.057206	0.157618	0.181195	0.195715	0.201302	0.219969	0.226155	0.214618	0.215331	0.218714	0.22463	0.230745	0.239294	0.233376	0.242082	0.127413	0.126456	0.130692
718	0.040963	0.054616	0.155306	0.178688	0.193293	0.198902	0.21751	0.22372	0.212144	0.212931	0.216393	0.222055	0.228358	0.236812	0.231037	0.239742	0.125195	0.124049	0.12838
719	0.038896	0.052166	0.15296	0.176362	0.190987	0.196597	0.215244	0.221423	0.209737	0.210656	0.214189	0.219841	0.225975	0.234686	0.228746	0.237615	0.123074	0.121893	0.126299
720	0.036773	0.049873	0.15092	0.174187	0.188894	0.194367	0.213141	0.219281	0.207757	0.208529	0.212149	0.217625	0.223887	0.232642	0.226804	0.235651	0.121129	0.119976	0.124435
721	0.034922	0.047769	0.148893	0.172064	0.187008	0.192354	0.211129	0.217164	0.205718	0.206521	0.210041	0.215483	0.221914	0.230723	0.224898	0.233682	0.119163	0.117974	0.122494
722	0.033204	0.045917	0.147078	0.170257	0.185229	0.190582	0.20947	0.215453	0.203876	0.204783	0.2083	0.21375	0.220137	0.229007	0.223148	0.231978	0.117494	0.116291	0.120928
723	0.031353	0.044118	0.145371	0.168508	0.18356	0.18876	0.207732	0.213715	0.202088	0.203043	0.206509	0.212015	0.218369	0.227197	0.221301	0.230315	0.115973	0.114723	0.119319
724	0.02985	0.042457	0.14383	0.166859	0.181971	0.18711	0.2061	0.212086	0.200593	0.201565	0.204881	0.210443	0.216876	0.225835	0.21982	0.228745	0.114445	0.113278	0.117857
725	0.028366	0.040789	0.142132	0.165315	0.180318	0.185559	0.204592	0.210452	0.198985	0.199928	0.203337	0.208782	0.215451	0.224225	0.218287	0.227156	0.112976	0.111832	0.116435
726	0.027018	0.039334	0.140683	0.163878	0.178995	0.184067	0.203166	0.208955	0.197479	0.198541	0.201797	0.207357	0.213852	0.22272	0.21677	0.225781	0.111744	0.110507	0.115236
727	0.025786	0.037951	0.139308	0.16246	0.177524	0.182562	0.201661	0.207472	0.195956	0.197155	0.200389	0.205991	0.212427	0.221382	0.215438	0.224377	0.110544	0.109247	0.113958
728	0.024665	0.036606	0.138025	0.161192	0.176227	0.181341	0.20043	0.206266	0.194649	0.195856	0.198968	0.204679	0.211155	0.220131	0.214177	0.223221	0.109264	0.108142	0.112736
729	0.023396	0.03542	0.136804	0.159887	0.175137	0.180139	0.199198	0.204903	0.193498	0.194616	0.197663	0.203369	0.20996	0.218818	0.21284	0.221868	0.10816	0.106975	0.111552
730	0.022283	0.034251	0.135597	0.158568	0.173897	0.178959	0.197847	0.20374	0.192241	0.193443	0.196447	0.20217	0.208653	0.217643	0.211704	0.22069	0.107088	0.10592	0.110536
731	0.021512	0.033008	0.134459	0.157411	0.172751	0.177746	0.196765	0.202622	0.190956	0.192253	0.195253	0.201123	0.207531	0.216496	0.210508	0.219549	0.105891	0.104941	0.109594
732	0.020504	0.032094	0.133421	0.156502	0.171753	0.176728	0.1958	0.201534	0.189936	0.191192	0.194185	0.199997	0.206383	0.215399	0.209484	0.218581	0.105101	0.103979	0.108738
733	0.01958	0.031176	0.132523	0.155411	0.170817	0.175778	0.194748	0.20056	0.188969	0.190227	0.19314	0.199018	0.205451	0.214369	0.208581	0.217559	0.104177	0.10311	0.107894
734	0.018713	0.030189	0.131429	0.15436	0.169798	0.174742	0.193737	0.199525	0.188042	0.189122	0.192031	0.197945	0.20439	0.213552	0.207422	0.216609	0.103296	0.102157	0.107065
735	0.017979	0.02917	0.130585	0.153449	0.168866	0.173781	0.192773	0.198606	0.187065	0.188106	0.191007	0.196959	0.203527	0.21249	0.206399	0.215708	0.102561	0.101377	0.106271
736	0.017377	0.028282	0.129624	0.152575	0.167995	0.17296	0.191893	0.197658	0.186246	0.187134	0.190005	0.196108	0.202616	0.211669	0.205457	0.214836	0.101925	0.100591	0.105532
737	0.01658	0.02744	0.128846	0.151673	0.167031	0.172023	0.191046	0.196882	0.185469	0.18628	0.189238	0.195296	0.201686	0.21075	0.20441	0.213938	0.101133	0.099826	0.104844
738	0.015802	0.0266	0.128027	0.150765	0.166329	0.17122	0.190141	0.195976	0.184553	0.185391	0.188289	0.19458	0.200768	0.209931	0.203547	0.213197	0.10049	0.099105	0.104118
739	0.015214	0.025923	0.127334	0.149992	0.165559	0.170473	0.189389	0.195309	0.183852	0.184732	0.187566	0.193886	0.200062	0.209122	0.202858	0.212373	0.099906	0.098526	0.1036
740	0.014622	0.025333	0.126759	0.149402	0.164993	0.169922	0.18869	0.194641	0.183249	0.184334	0.186869	0.193306	0.199374	0.208503	0.202182	0.211731	0.099414	0.097948	0.103039
741	0.01418	0.024459	0.125795	0.148543	0.16405	0.168785	0.187811	0.193756	0.182315	0.183383	0.186052	0.192264	0.198535	0.207714	0.201364	0.210775	0.098573	0.097201	0.102288
742	0.013536	0.023908	0.125077	0.147872	0.163321	0.168063	0.187132	0.193107	0.181595	0.182549	0.185392	0.191594	0.197894	0.207051	0.20073	0.210024	0.098065	0.096679	0.101795
743	0.012909	0.023352	0.1243	0.147134	0.162688	0.167365	0.186393	0.192411	0.180874	0.181894	0.184738	0.190803	0.197085	0.206303	0.200095	0.209393	0.097522	0.096134	0.101154
744	0.012399	0.022761	0.123624	0.146526	0.162151	0.166767	0.185871	0.191893	0.180188	0.181397	0.184168	0.190149	0.196173	0.205716	0.199565	0.208848	0.097124	0.09571	0.10073
745	0.011938	0.022207	0.123149	0.145872	0.16163	0.166077	0.185266	0.191237	0.179535	0.18064	0.183438	0.189594	0.195614	0.205039	0.198907	0.208198	0.096726	0.095241	0.100244
746	0.011542	0.021704	0.122663	0.145328	0.160987	0.165511	0.184673	0.190674	0.179022	0.180057	0.18285	0.189058	0.195016	0.204362	0.198351	0.207629	0.096228	0.094788	0.09974
747	0.011012	0.021089	0.122029	0.144832	0.160364	0.164808	0.184054	0.190187	0.178327	0.179444	0.182195	0.188522	0.194384	0.203812	0.197712	0.207055	0.0959	0.094286	0.099307
748	0.010607	0.020595	0.121476	0.144223	0.159837	0.164319	0.183565	0.189669	0.177807	0.179014	0.181726	0.187918	0.193983	0.203319	0.19708	0.206529	0.095452	0.093907	0.098873
749	0.010222	0.020146	0.120884	0.143662	0.159361	0.163892	0.183081	0.189176	0.177252	0.178495	0.181193	0.18752	0.193428	0.202448	0.196512	0.205991	0.094956	0.093596	0.098595
750	0.009737	0.019704	0.120457	0.143173	0.158838	0.163399	0.182596	0.188644	0.176724	0.177911	0.180595	0.187088	0.192934	0.201967	0.196008	0.205512	0.094697	0.09319	0.098228
751	0.009371	0.019363	0.120033	0.142739	0.15842	0.1629	0.182222	0.188214	0.176299	0.177351	0.180081	0.18658	0.192446	0.201517	0.195603	0.205077	0.094313	0.092811	0.09796
752	0.009103	0.018919	0.119564	0.142314	0.157961	0.162443	0.181766	0.187728	0.175881	0.176798	0.179553	0.186099	0.191952	0.201081	0.19514	0.204627	0.094038	0.09244	0.097577
753	0.008828	0.01845	0.1191	0.141672	0.157368	0.161783	0.181205	0.187164	0.175345	0.176141	0.179023	0.185421	0.191348	0.200462	0.194451	0.204008	0.093514	0.092009	0.097193
754	0.008597	0.018113	0.118607	0.14124	0.156978	0.161348	0.180769	0.186765	0.174967	0.175805	0.178667	0.185021	0.19106	0.20009	0.194141	0.203505	0.093299	0.091752	0.096827
755	0.008323	0.017816	0.118292	0.14093	0.156652	0.160937	0.180355	0.186294	0.174438	0.175244	0.17823	0.184587	0.190661	0.199662	0.19365	0.203155	0.092994	0.091366	0.096579
756	0.007818	0.017347	0.117931	0.14065	0.156235	0.16059	0.179935	0.185935	0.174063	0.174756	0.177717	0.184155	0.190262	0.199152	0.193179	0.203015	0.092648	0.091108	0.096185
757	0.007638	0.017045	0.117453	0.140228	0.155932	0.160101	0.179459	0.18546	0.173565	0.174365	0.177148	0.183795	0.189803	0.198792	0.192831	0.202598	0.092417	0.090742	0.095951
758	0.007485	0.016901	0.117375	0.140037	0.15568	0.159982	0.179268	0.185139	0.173305	0.174205	0.176919	0.183558	0.189636	0.198681	0.192517	0.202515	0.092459	0.09075	0.095825
759	0.007141	0.01647	0.116807	0.139418	0.155065	0.159342	0.178742	0.184763	0.172834	0.173621	0.176333	0.183127	0.189096	0.198084	0.192016	0.201949	0.092275	0.090443	0.095469
760	0.006873	0.016273	0.116536	0.139258	0.15479	0.159115	0.178411	0.184474	0.172526	0.173283	0.176215	0.182784	0.188858	0.197818	0.191778	0.201626	0.092098	0.090154	0.095273
761	0.006627	0.015828	0.116139	0.13874	0.154449	0.158641	0.177981	0.184137	0.172079	0.172888	0.175674	0.182451	0.188365	0.197444	0.191264	0.201156	0.091769	0.089964	0.095042
762	0.006354	0.015576	0.115824	0.138318	0.15402	0.158321	0.177446	0.184009	0.171783	0.17259	0.175229	0.182356	0.188076	0.196993	0.190943	0.200783	0.091573	0.089676	0.094818
763	0.006232	0.015369	0.115498	0.137922	0.153669	0.157861	0.177126	0.183702	0.171336	0.172213	0.174856	0.182088	0.187804	0.196784	0.190632	0.200481	0.091242	0.08934	0.094451
764	0.006079	0.014917	0.115091	0.137582	0.153246	0.157455	0.176698	0.183214	0.170915	0.171679	0.17448	0.181636	0.187324	0.196267	0.19016	0.199998	0.090909	0.089082	0.094215
765	0.005949	0.014687	0.114752	0.137227	0.152862	0.157067	0.176354	0.18308	0.170579	0.171474	0.174134	0.181275	0.186987	0.195912	0.189777	0.199556	0.090561	0.08885	0.093968
766	0.005693	0.014627	0.114518	0.137083	0.15266	0.156805	0.176154	0.18262	0.17038	0.171262	0.173798	0.181012	0.186696	0.195492	0.18957	0.199283	0.090486	0.088645	0.093809
767	0.00546	0.014475	0.114192	0.136765	0.15229	0.156447	0.175723	0.182319	0.169868	0.17092	0.173395	0.180649	0.186293	0.195244	0.189174	0.198909	0.090214	0.088552	0.093593
768	0.005232	0.014187	0.113874	0.136395	0.152031	0.156114	0.175376	0.182159	0.169595	0.170524	0.172906	0.180414	0.186081	0.194988	0.188937	0.198824	0.090063	0.088358	0.093383
769	0.005054	0.014106	0.113795	0.136201	0.151799	0.155924	0.17516	0.182008	0.169272	0.170389	0.172655	0.180225	0.185863	0.194715	0.188815	0.198436	0.089978	0.088308	0.09329
770	0.00489	0.013933	0.113464	0.13594	0.151693	0.155633	0.174866	0.181617	0.169019	0.170087	0.172354	0.179882	0.185693	0.194417	0.188525	0.198135	0.089708	0.088069	0.093245
771	0.004731	0.013593	0.113141	0.135635	0.15134	0.155317	0.174527	0.181345	0.168716	0.169808	0.171972	0.179511	0.185304	0.194064	0.18812	0.19785	0.089571	0.087851	0.09297
772	0.004662	0.013507	0.1132	0.135548	0.151104	0.155082	0.174397	0.181061	0.168404	0.169667	0.171695	0.179406	0.185119	0.193843	0.187931	0.197609	0.0895	0.087827	0.092943
773	0.004412	0.013427	0.112945	0.135259	0.150944	0.154768	0.174205	0.180856	0.168098	0.169385	0.171536	0.179117	0.18485	0.193718	0.187578	0.19742	0.089374	0.08769	0.092697
774	0.004514	0.01306	0.112553	0.134868	0.150664	0.154295	0.173795	0.180468	0.167843	0.169035	0.171069	0.178727	0.184526	0.193213	0.187206	0.197096	0.08905	0.087433	0.092286
775	0.004278	0.012995	0.112356	0.134785	0.150458	0.154021	0.17348	0.180362	0.167648	0.168848	0.170844	0.178565	0.184223	0.192999	0.186971	0.196822	0.088961	0.087398	0.092105
776	0.004093	0.012711	0.112041	0.134508	0.15008	0.153763	0.173337	0.1801	0.167286	0.168647	0.17049	0.178237	0.183974	0.192705	0.186636	0.196493	0.088689	0.08715	0.091902
777	0.003949	0.012541	0.111924	0.134216	0.149946	0.153507	0.173041	0.17987	0.167055	0.168517	0.170119	0.177957	0.183772	0.192477	0.186333	0.196212	0.088679	0.087084	0.09175
778	0.004086	0.012458	0.111753	0.134082	0.14961	0.153305	0.17282	0.179764	0.166738	0.168388	0.169969	0.177822	0.183474	0.192238	0.186166	0.195765	0.088637	0.08685	0.091604
779	0.003958	0.012166	0.111519	0.133696	0.149325	0.153021	0.172553	0.179453	0.166421	0.168179	0.169607	0.177575	0.183066	0.191927	0.185769	0.195413	0.088447	0.086686	0.091372
780	0.003913	0.012032	0.111257	0.133487	0.148972	0.152608	0.172202	0.179042	0.166082	0.167847	0.169234	0.177164	0.18269	0.191628	0.185547	0.1951	0.088218	0.086479	0.091209
781	0.003727	0.012023	0.111033	0.133367	0.148865	0.152356	0.172067	0.179019	0.166005	0.168047	0.168945	0.177139	0.182635	0.191613	0.185338	0.195058	0.088131	0.086374	0.091208
782	0.003666	0.012025	0.110919	0.133356	0.148756	0.152156	0.17193	0.178903	0.16566	0.168145	0.168796	0.17701	0.182407	0.191418	0.185176	0.194929	0.088171	0.086377	0.091228
783	0.003299	0.01183	0.110637	0.133017	0.148432	0.151775	0.171621	0.178766	0.165438	0.167897	0.168557	0.176621	0.182261	0.19106	0.184815	0.194576	0.087965	0.085878	0.090818
784	0.003338	0.011551	0.11035	0.132613	0.148098	0.151518	0.171124	0.178439	0.164952	0.167583	0.168174	0.176328	0.1819	0.190745	0.184615	0.19415	0.087899	0.085629	0.090761
785	0.003236	0.011501	0.11014	0.132532	0.148019	0.151366	0.171045	0.178398	0.164742	0.167529	0.167945	0.176188	0.181766	0.190601	0.184532	0.193877	0.087804	0.085554	0.090661
786	0.003093	0.011504	0.110172	0.132459	0.147822	0.151343	0.170989	0.178538	0.164642	0.167417	0.16797	0.176107	0.181651	0.190562	0.184464	0.193908	0.087995	0.085572	0.090646
787	0.003067	0.011143	0.109718	0.132129	0.147268	0.150943	0.170559	0.17811	0.164393	0.167121	0.167576	0.175759	0.181265	0.190125	0.183975	0.193509	0.087773	0.085251	0.090435
788	0.003182	0.011177	0.109687	0.132043	0.147218	0.150743	0.170415	0.177976	0.164221	0.166997	0.167389	0.17558	0.181119	0.190001	0.18384	0.193359	0.087778	0.085302	0.090392
789	0.003048	0.010955	0.109381	0.131826	0.146963	0.150464	0.170066	0.177699	0.163986	0.1668	0.166995	0.175274	0.180909	0.189608	0.183509	0.193033	0.087619	0.085105	0.09027
790	0.003146	0.010853	0.109206	0.131586	0.146783	0.15029	0.169934	0.177395	0.163758	0.166587	0.166947	0.175028	0.180676	0.18956	0.1832	0.192829	0.087534	0.085045	0.090145
791	0.003004	0.010613	0.108945	0.131337	0.146477	0.149971	0.169567	0.177261	0.163394	0.166324	0.166624	0.174752	0.18032	0.18916	0.182765	0.192453	0.087275	0.085027	0.08991
792	0.00296	0.010528	0.108707	0.131214	0.146185	0.149595	0.169375	0.177022	0.16314	0.166162	0.166296	0.174579	0.180227	0.188916	0.182465	0.192346	0.087159	0.084864	0.089916
793	0.002945	0.01057	0.108627	0.131149	0.14614	0.149531	0.1695	0.176996	0.163101	0.166103	0.166234	0.174572	0.180048	0.188832	0.182241	0.192217	0.087109	0.08496	0.089827
794	0.002888	0.010398	0.108607	0.130922	0.145954	0.149278	0.16925	0.176823	0.162846	0.166086	0.165974	0.174318	0.179772	0.188643	0.182075	0.191896	0.087158	0.08489	0.089891
795	0.002717	0.010286	0.108296	0.130644	0.14567	0.149199	0.169007	0.176516	0.162718	0.165776	0.165636	0.173957	0.179489	0.188354	0.181753	0.191772	0.08691	0.084771	0.089694
796	0.00263	0.010208	0.108147	0.130419	0.145395	0.148901	0.168719	0.176427	0.162533	0.165535	0.165417	0.173784	0.17924	0.188008	0.181407	0.191506	0.086806	0.084592	0.089594
797	0.002526	0.010243	0.108036	0.130345	0.145431	0.148672	0.168281	0.17631	0.162292	0.165458	0.165195	0.173589	0.179	0.187781	0.181343	0.19143	0.086827	0.084519	0.089589
798	0.002629	0.010148	0.10792	0.13011	0.145029	0.148412	0.168056	0.17622	0.161998	0.165273	0.165006	0.173267	0.178864	0.187346	0.180986	0.1911	0.086679	0.084396	0.089519
799	0.002504	0.010082	0.107639	0.129995	0.144848	0.148278	0.167814	0.176097	0.161859	0.165058	0.164734	0.173113	0.178676	0.187274	0.180966	0.19098	0.086636	0.084213	0.089381
800	0.002521	0.010095	0.107657	0.129958	0.144894	0.148169	0.16793	0.176176	0.161836	0.165055	0.164884	0.172985	0.178815	0.187086	0.181191	0.191048	0.086685	0.084267	0.08955

## Sheet: % dye removal
	MB dye %	MB dye%	MB dye%
Time (minutes)	Ag NPs	Fe NPs	Ag-Fe NPs
0	0	0	0
10	7	7	15
20	11	12	29
30	13	12	36
40	13	13	38
50	14	13	39
60	16	13	40
70	16	13	41
80	17	15	48
90	17	16	62
100	17	16	64
110	18	17	67
120	20	17	70
130	19	17	72
140	20	18	76
150	20	19	88
160	19	21	89
170	19	21	89
180	18	22	89
